# Supplementary material
Source: publisher site journal article supplement (https://www.dovepress.com/article/106196)
Supplement: Supplementary file 1 [file get_supplementary_file.php]

**Supplementary Figure 1.** Genetic alteration analysis of all the 85 cytoskeleton regulators from 291 patients analyzed in this study.

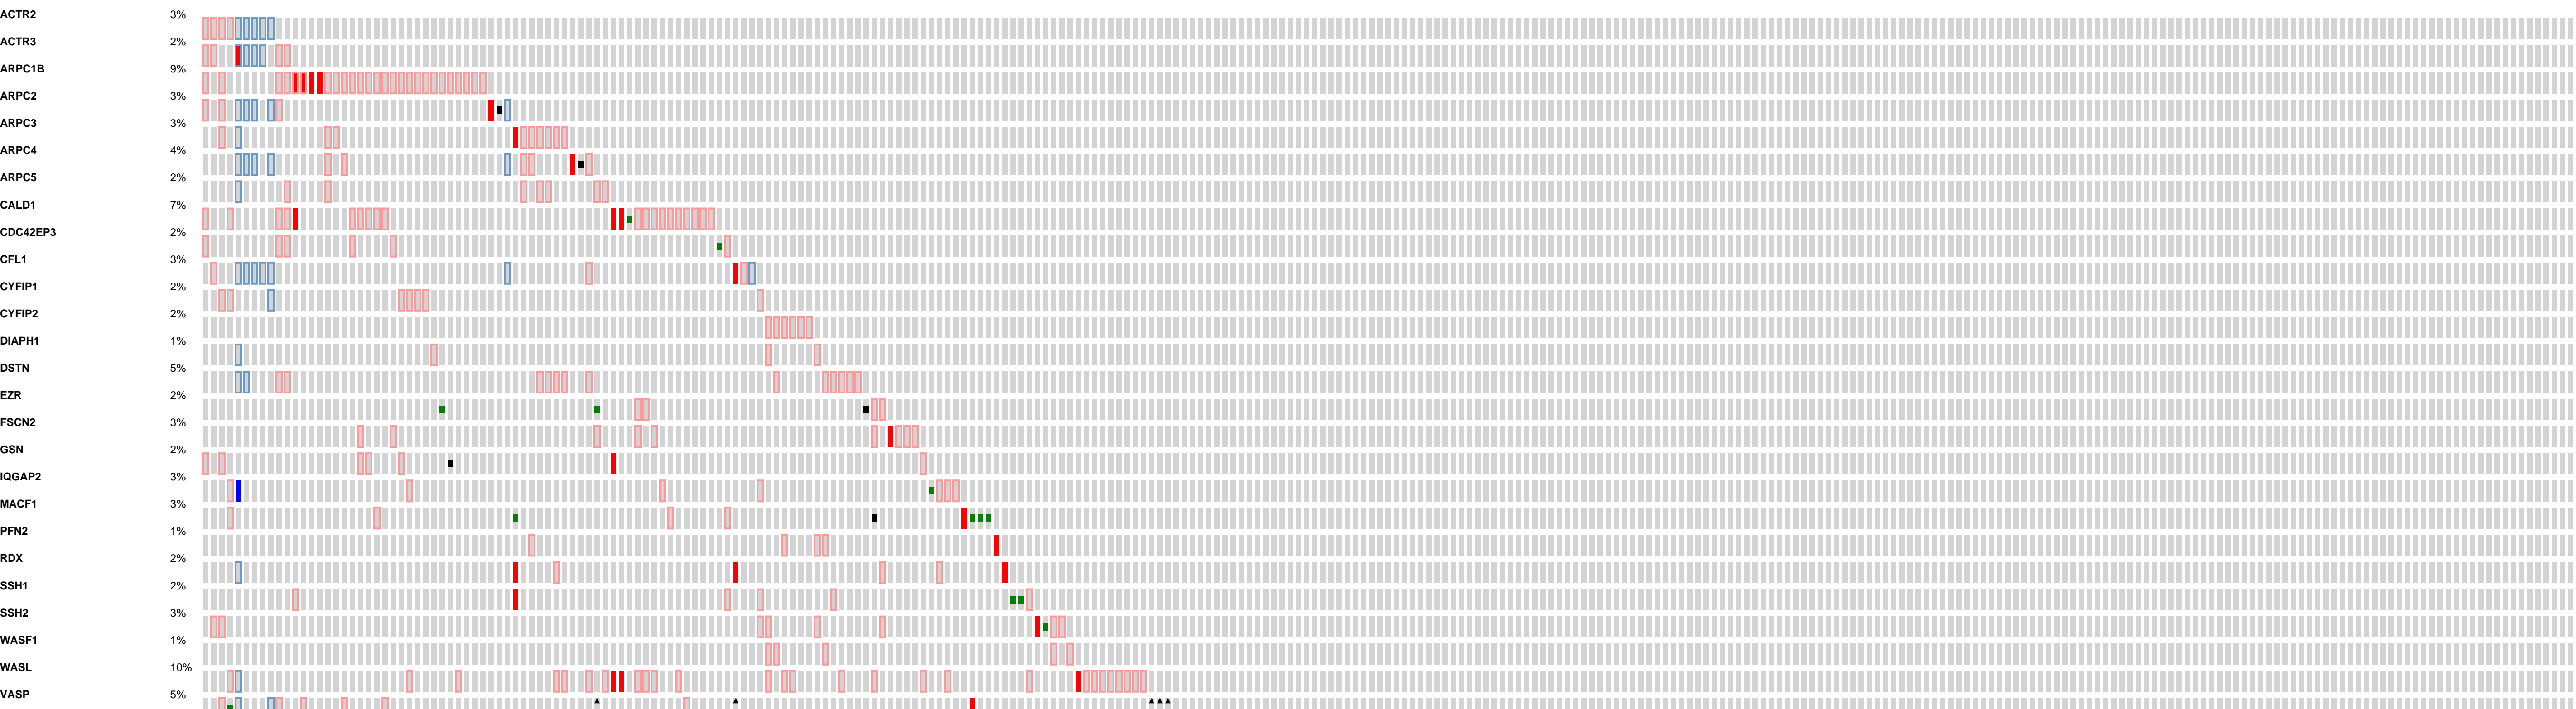

**Genetic Alteration**

- Amplification
- Deep Deletion
- Missense Mutation
- Truncating Mutation
- Protein Upregulation
- mRNA Upregulation
- mRNA Downregulation

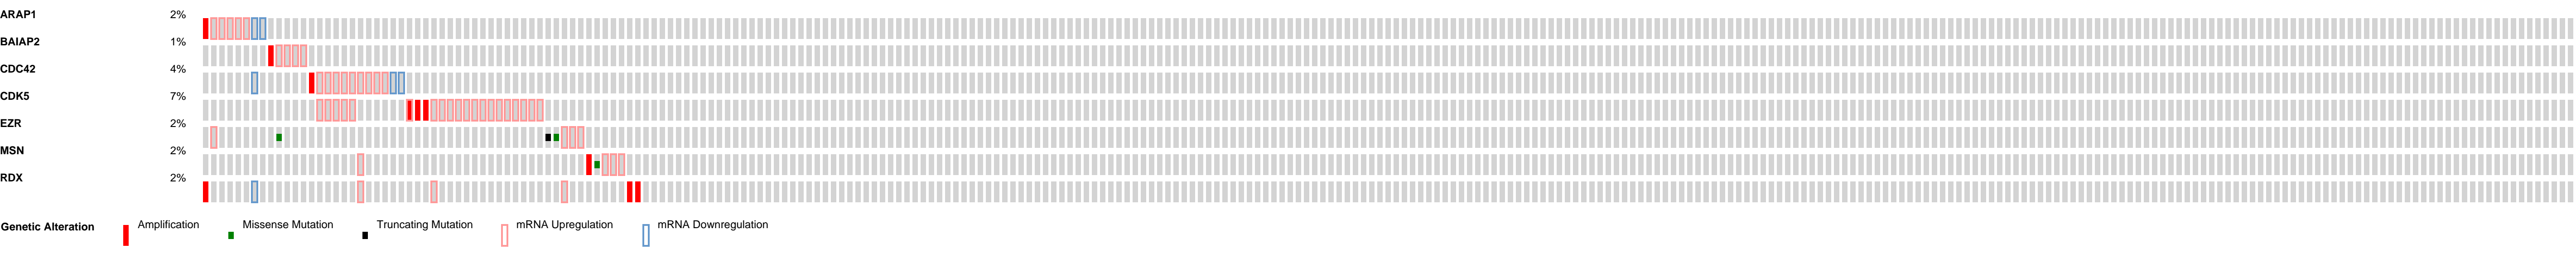

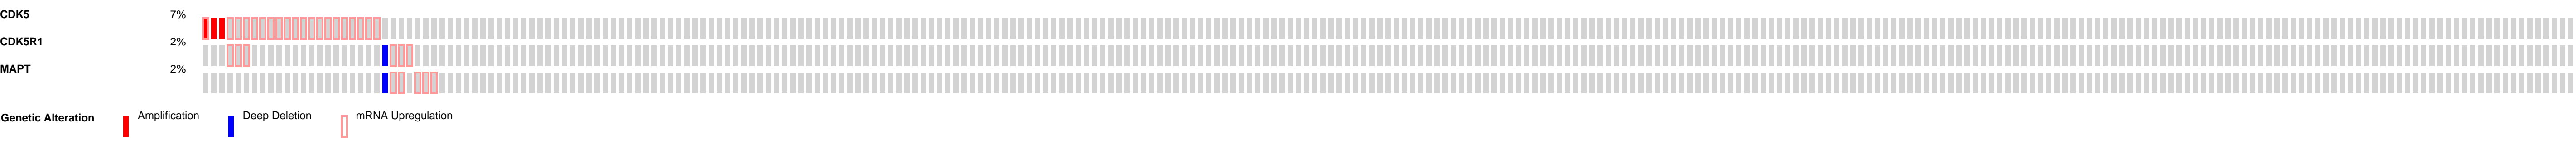



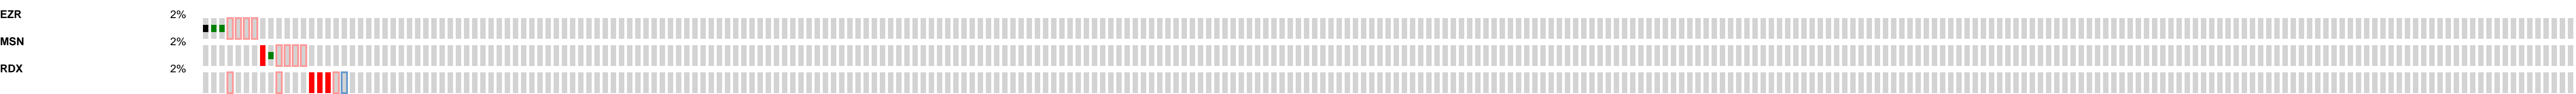

**Genetic Alteration**

- █ Amplification
- █ Missense Mutation
- █ Truncating Mutation
- mRNA Upregulation
- mRNA Downregulation

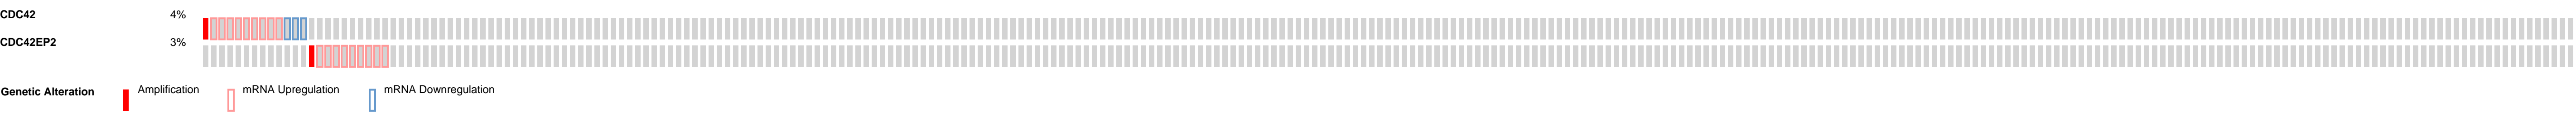





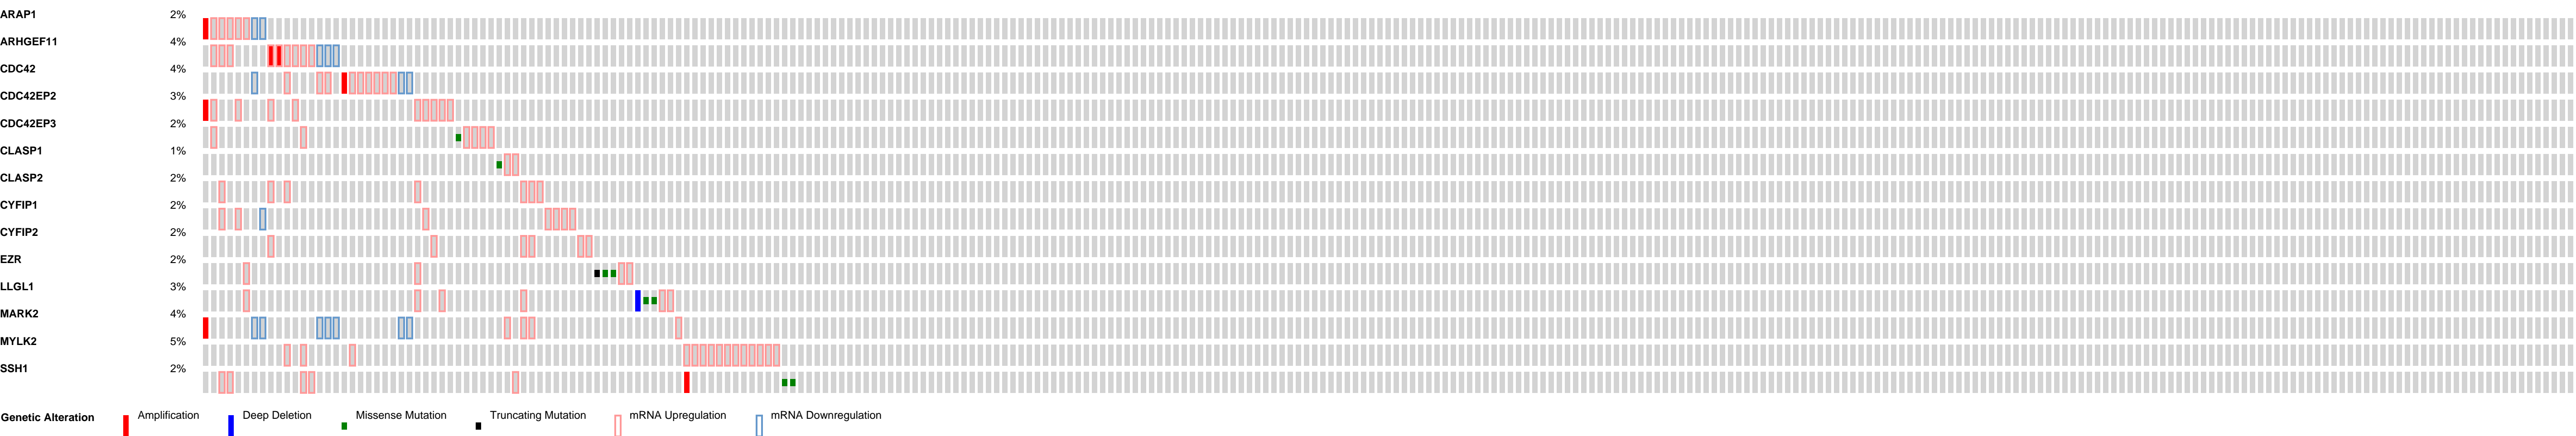

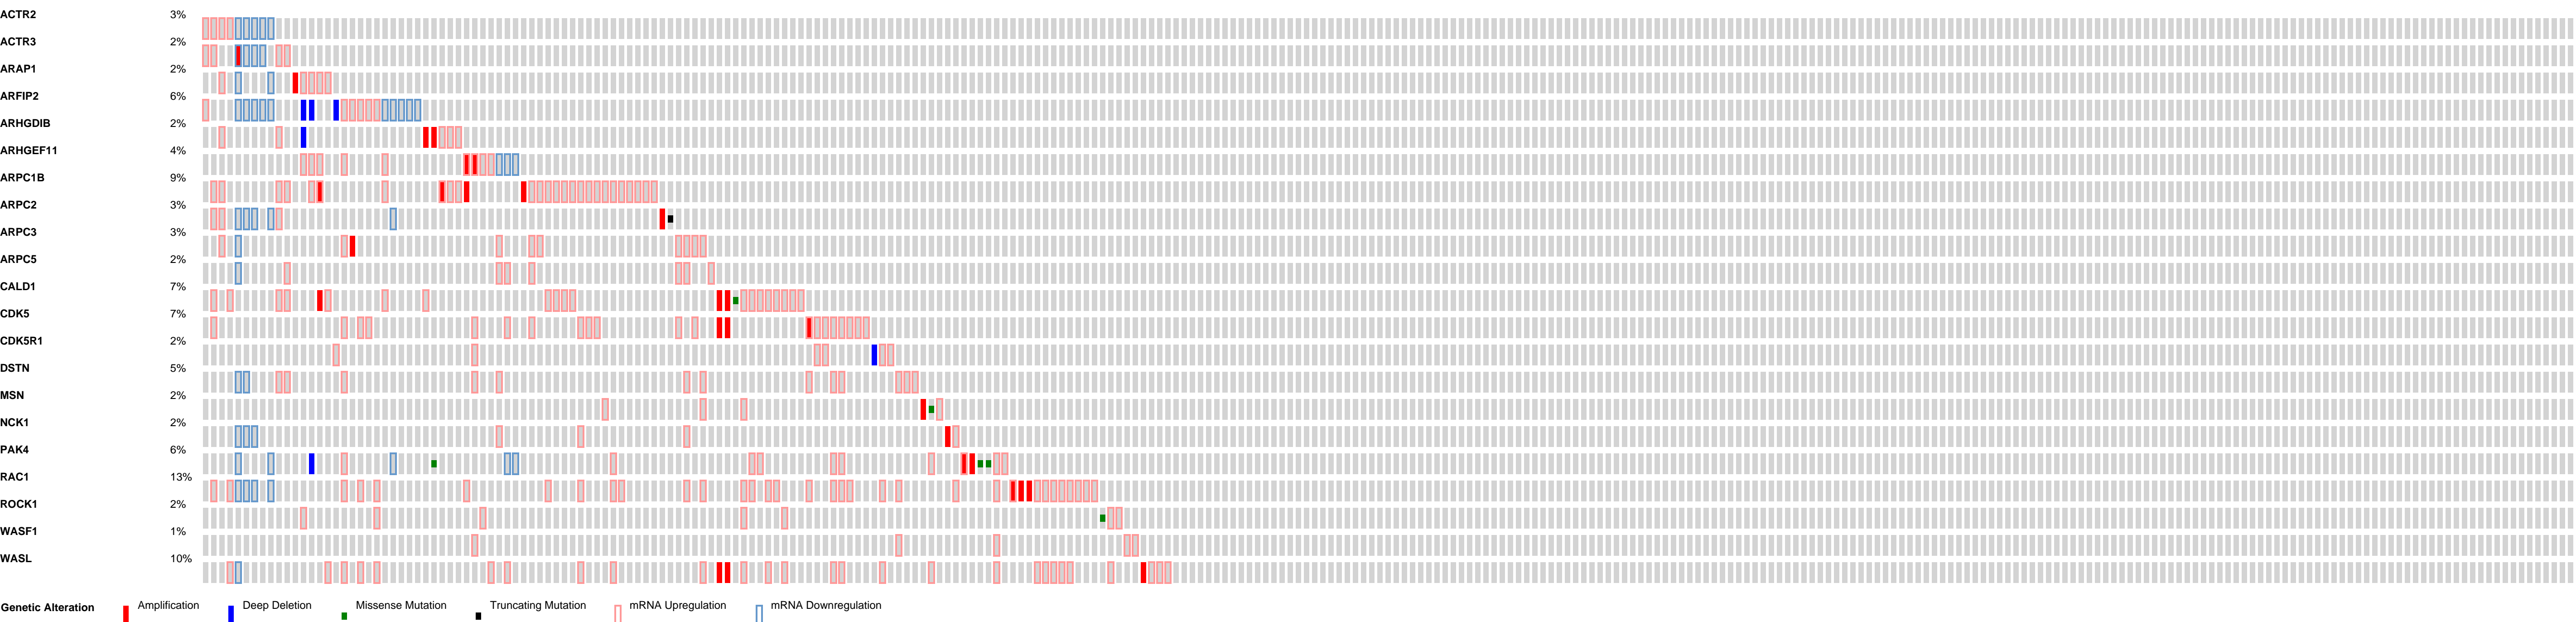

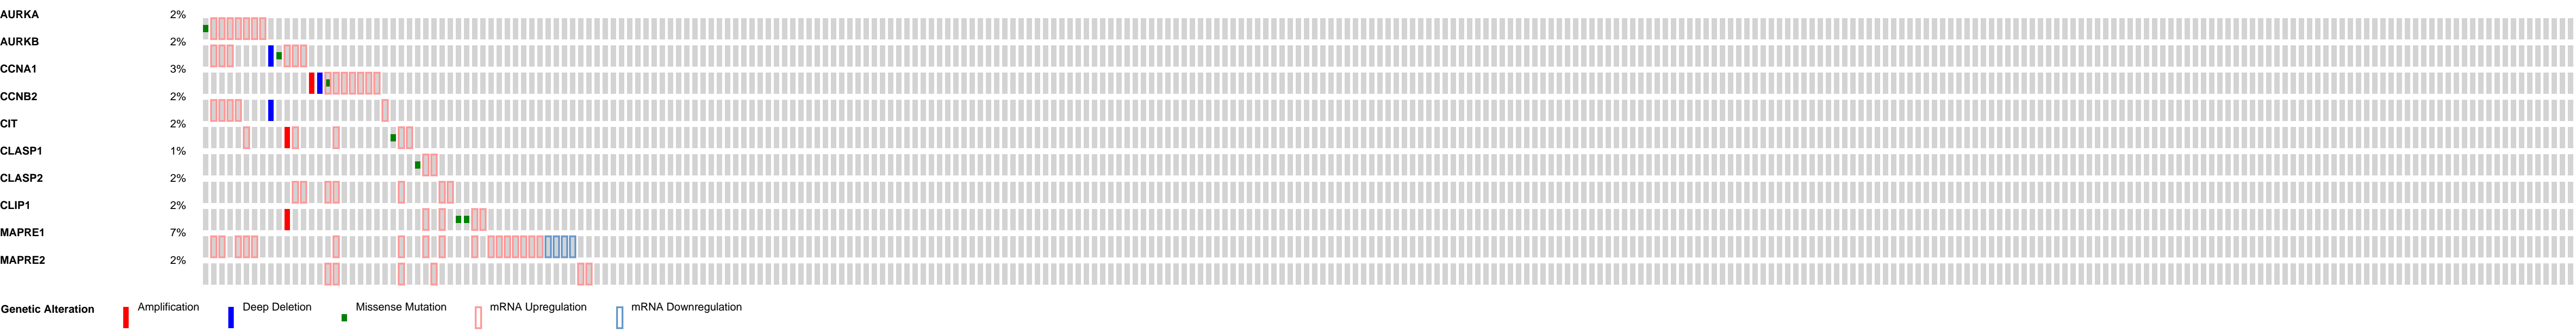

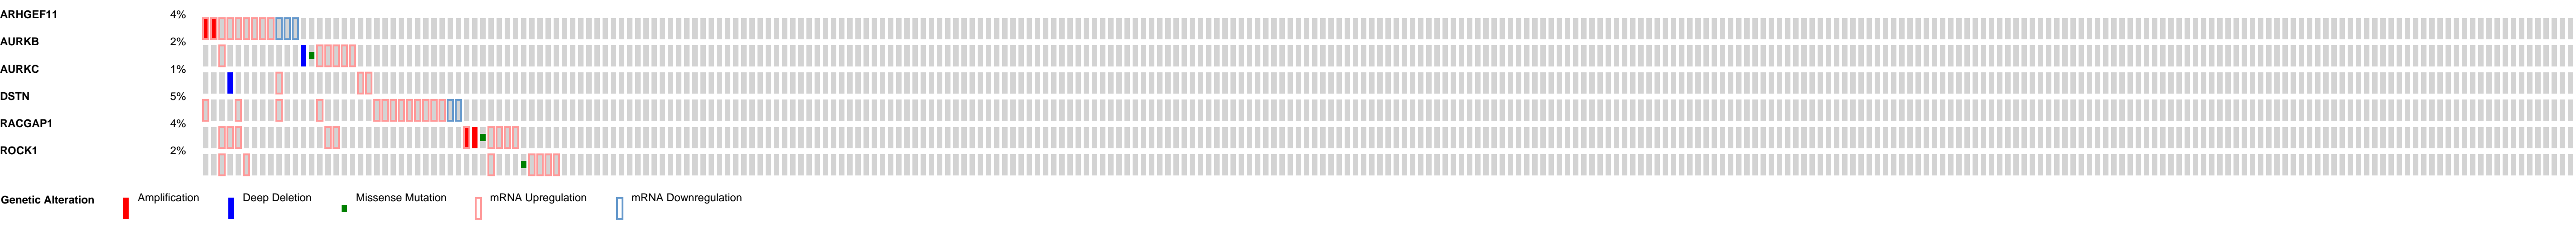

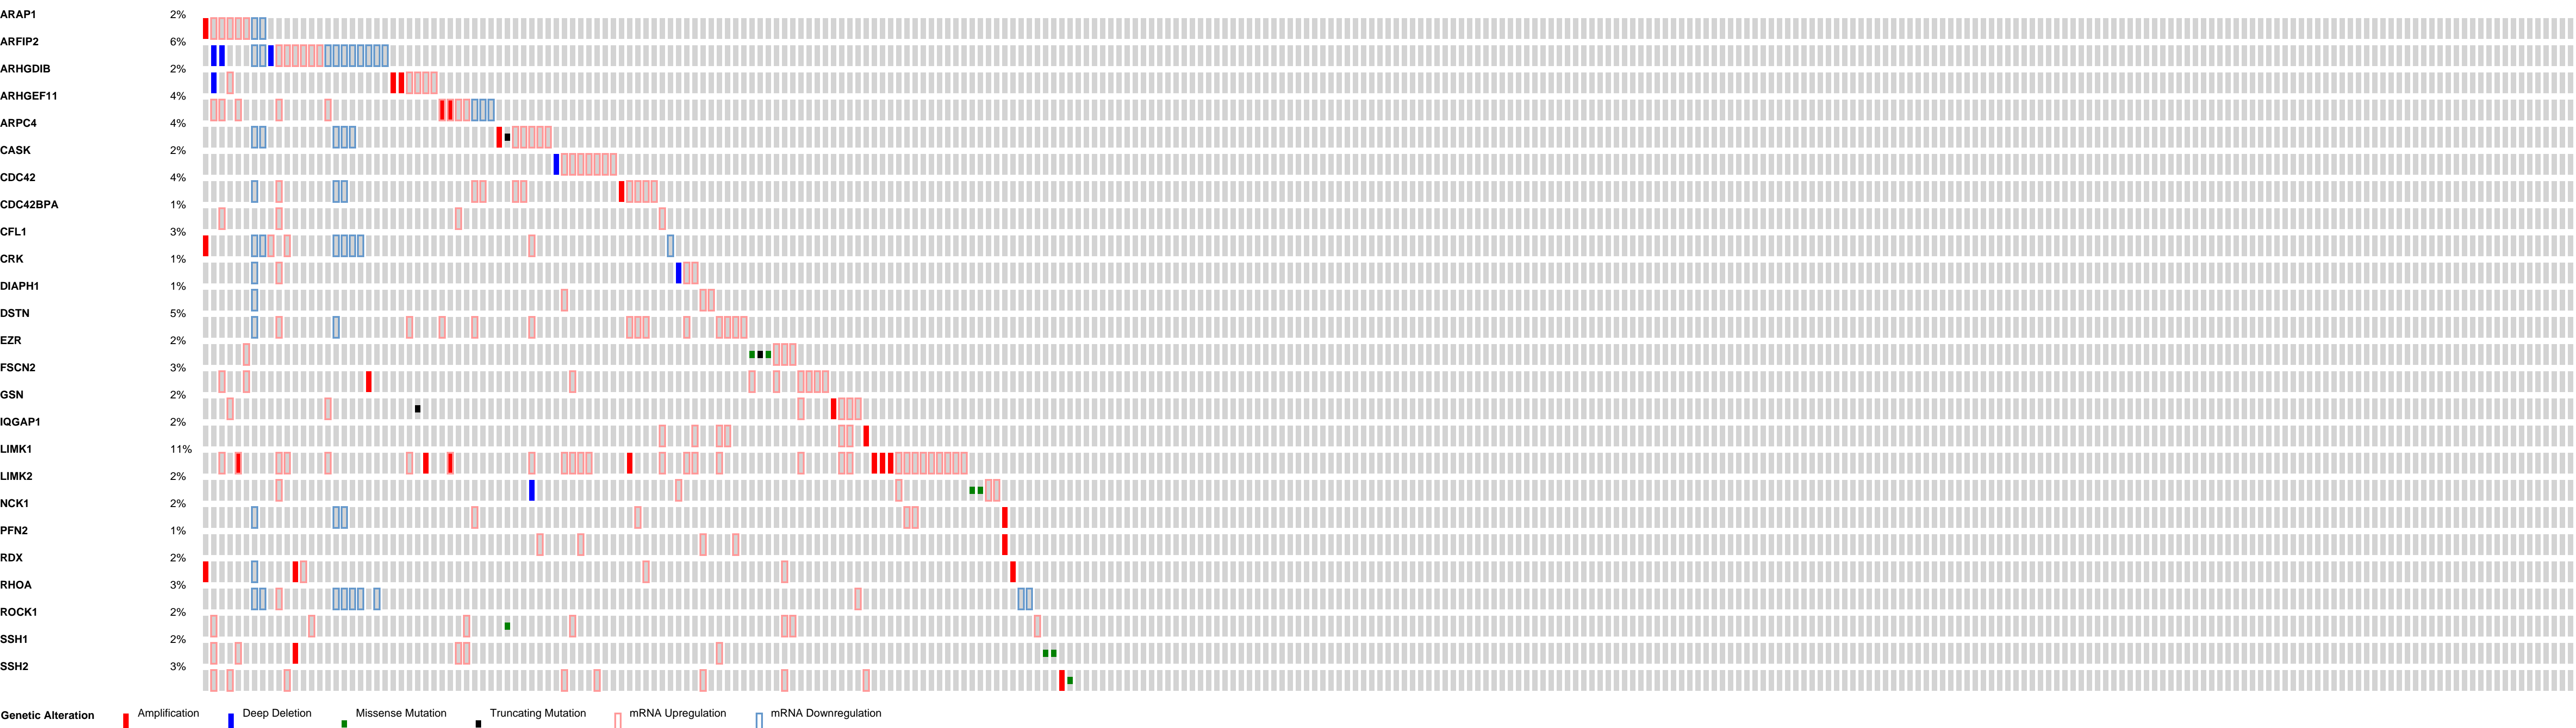

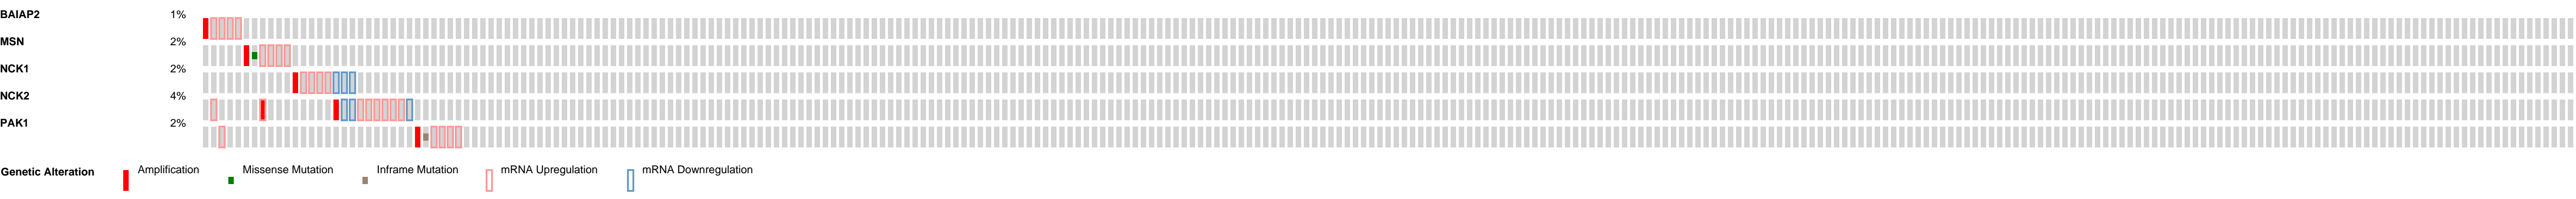

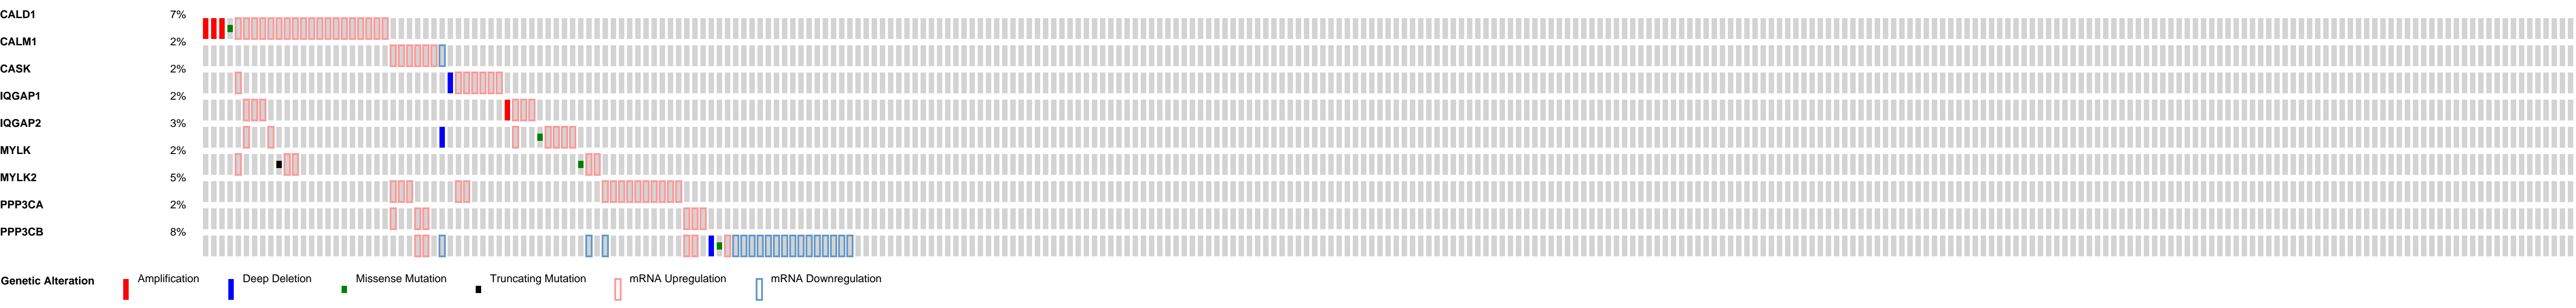





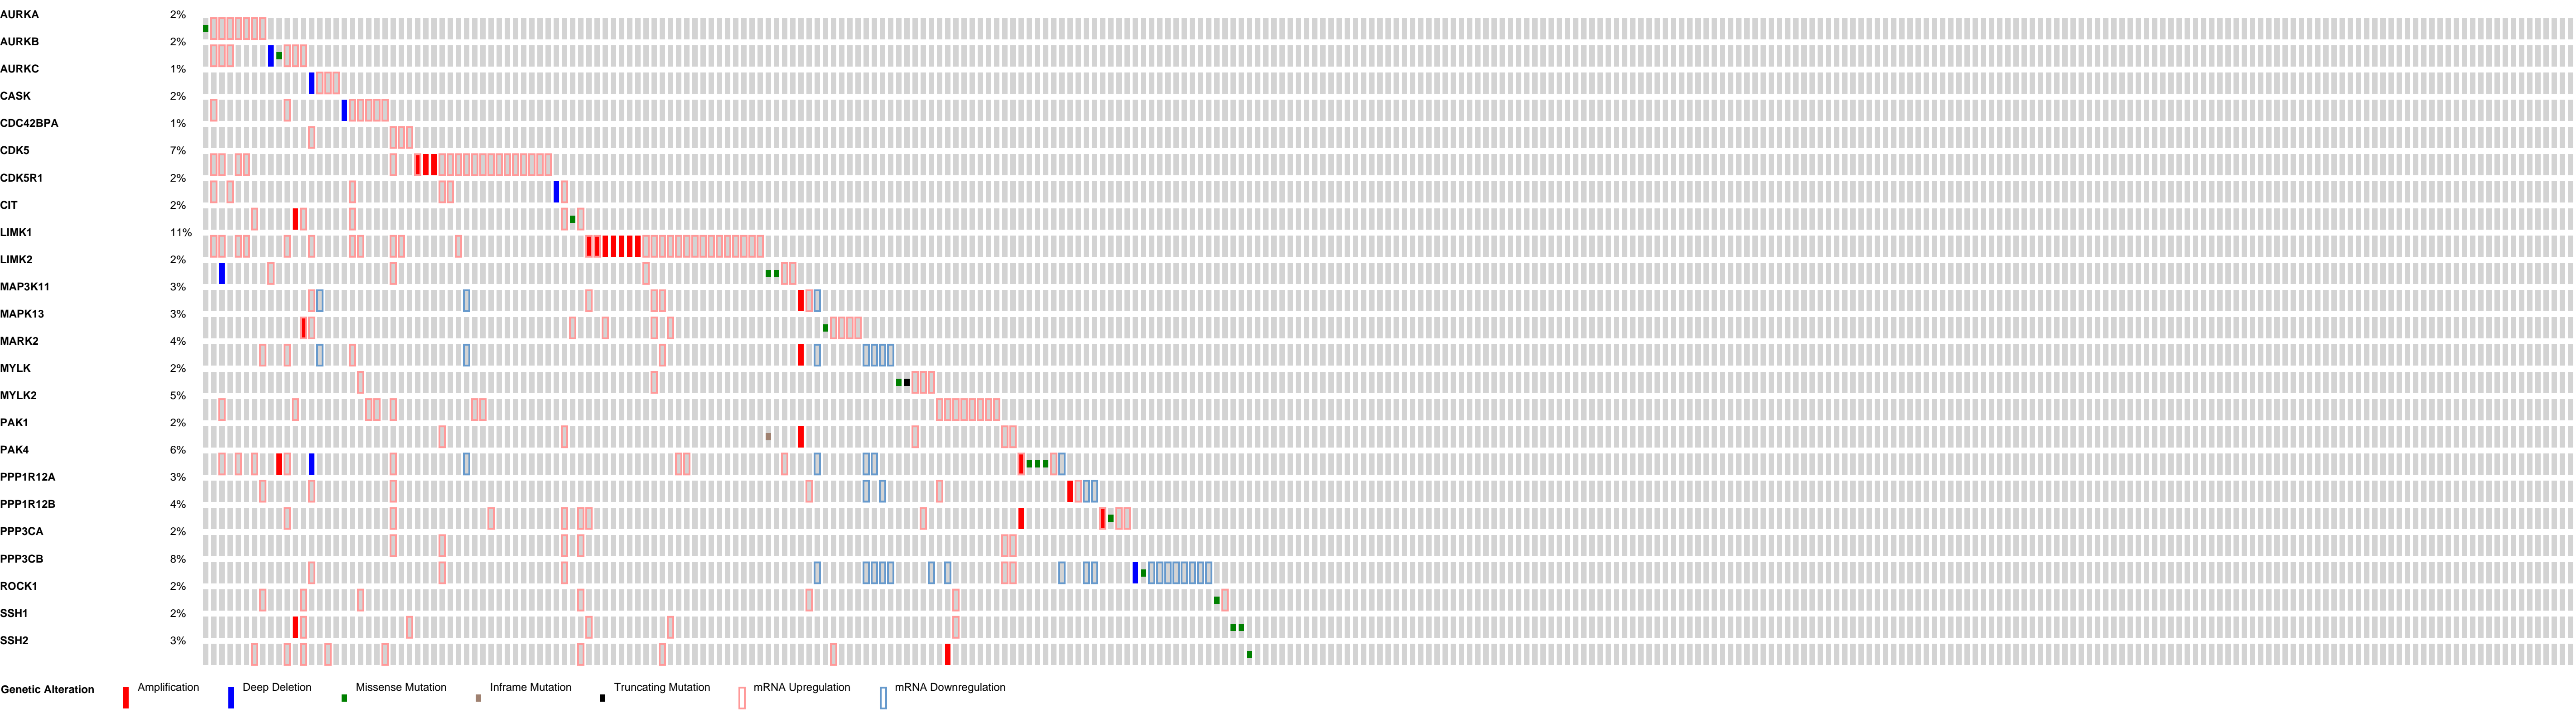



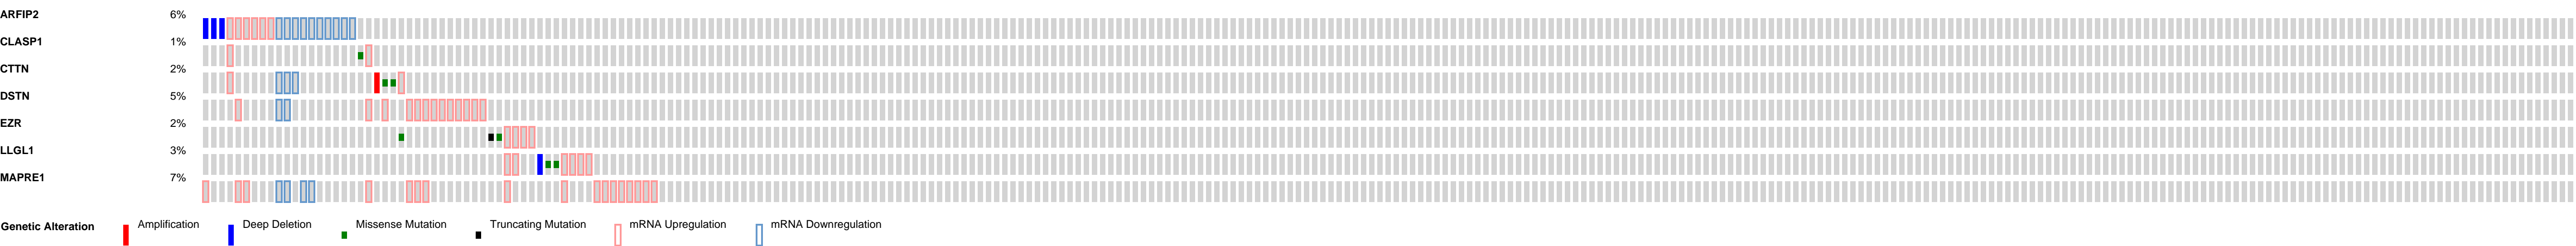



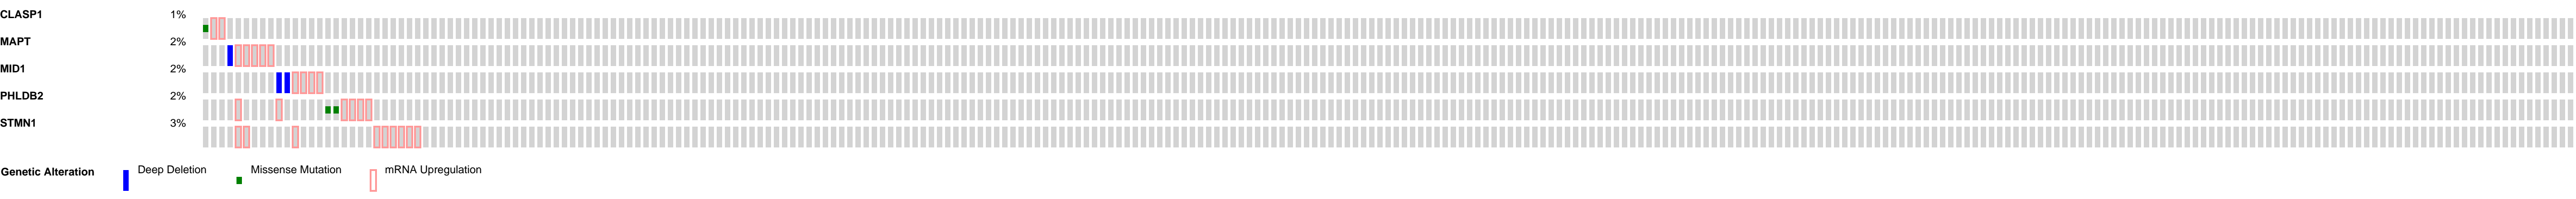

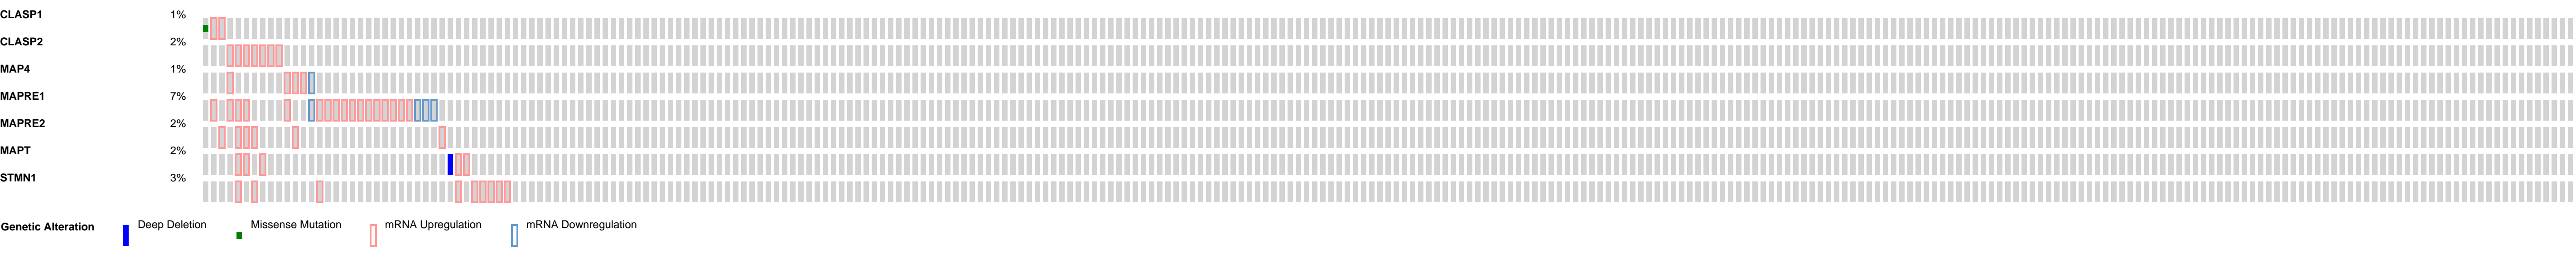

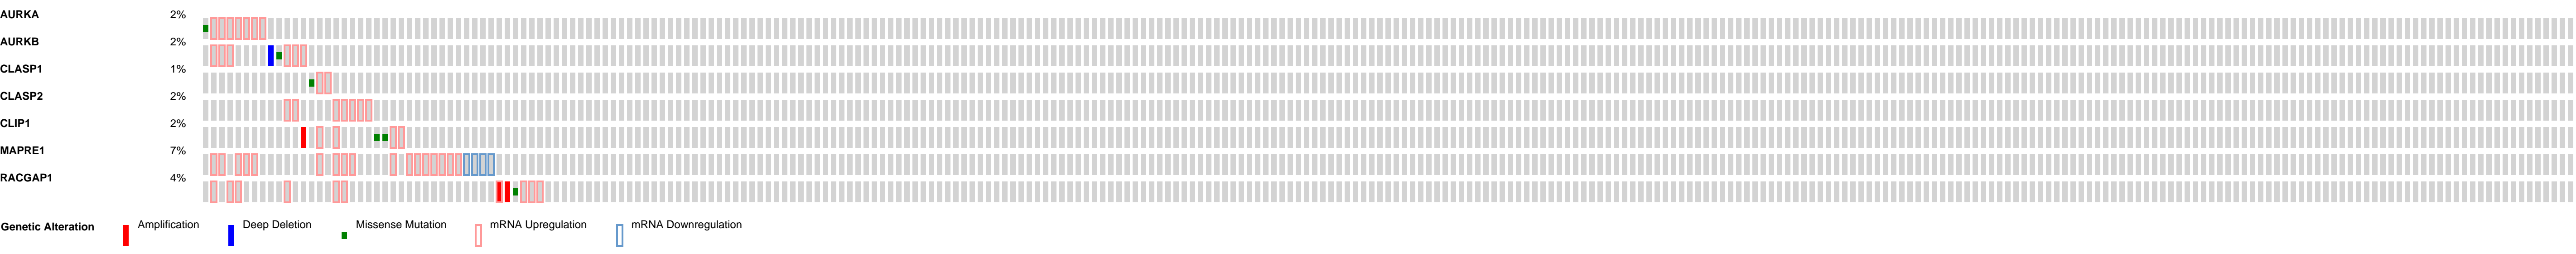

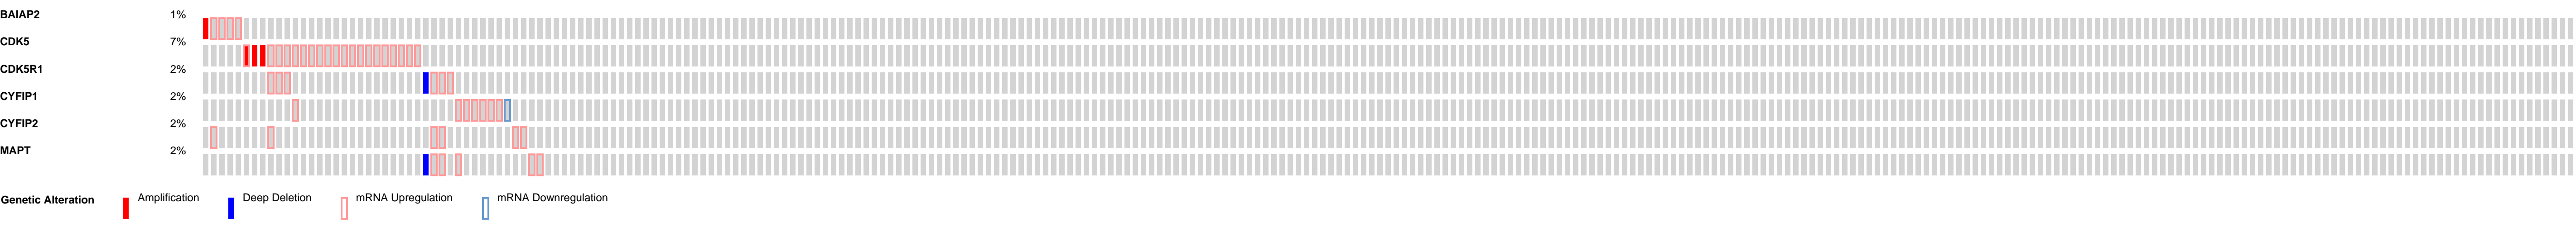



**Supplementary Figure 2.** Survival plots of patients with high or low expression of cytoskeleton regulators analyzed in this study.

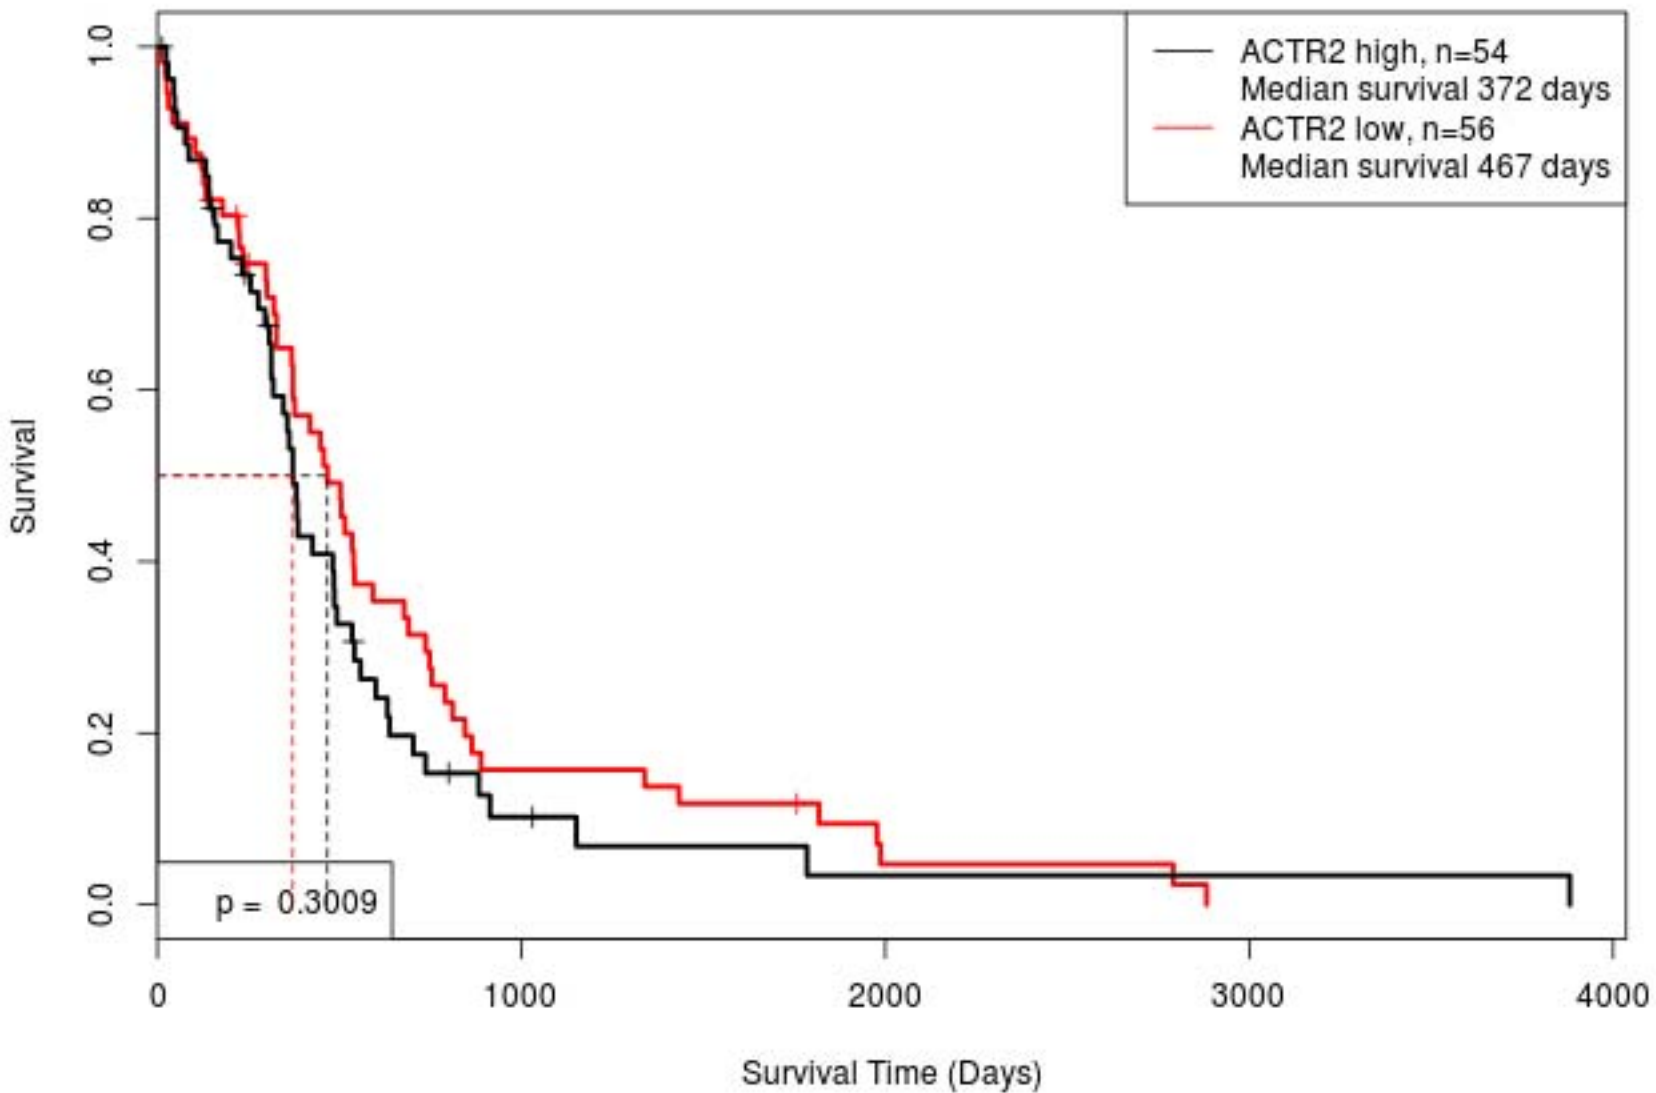

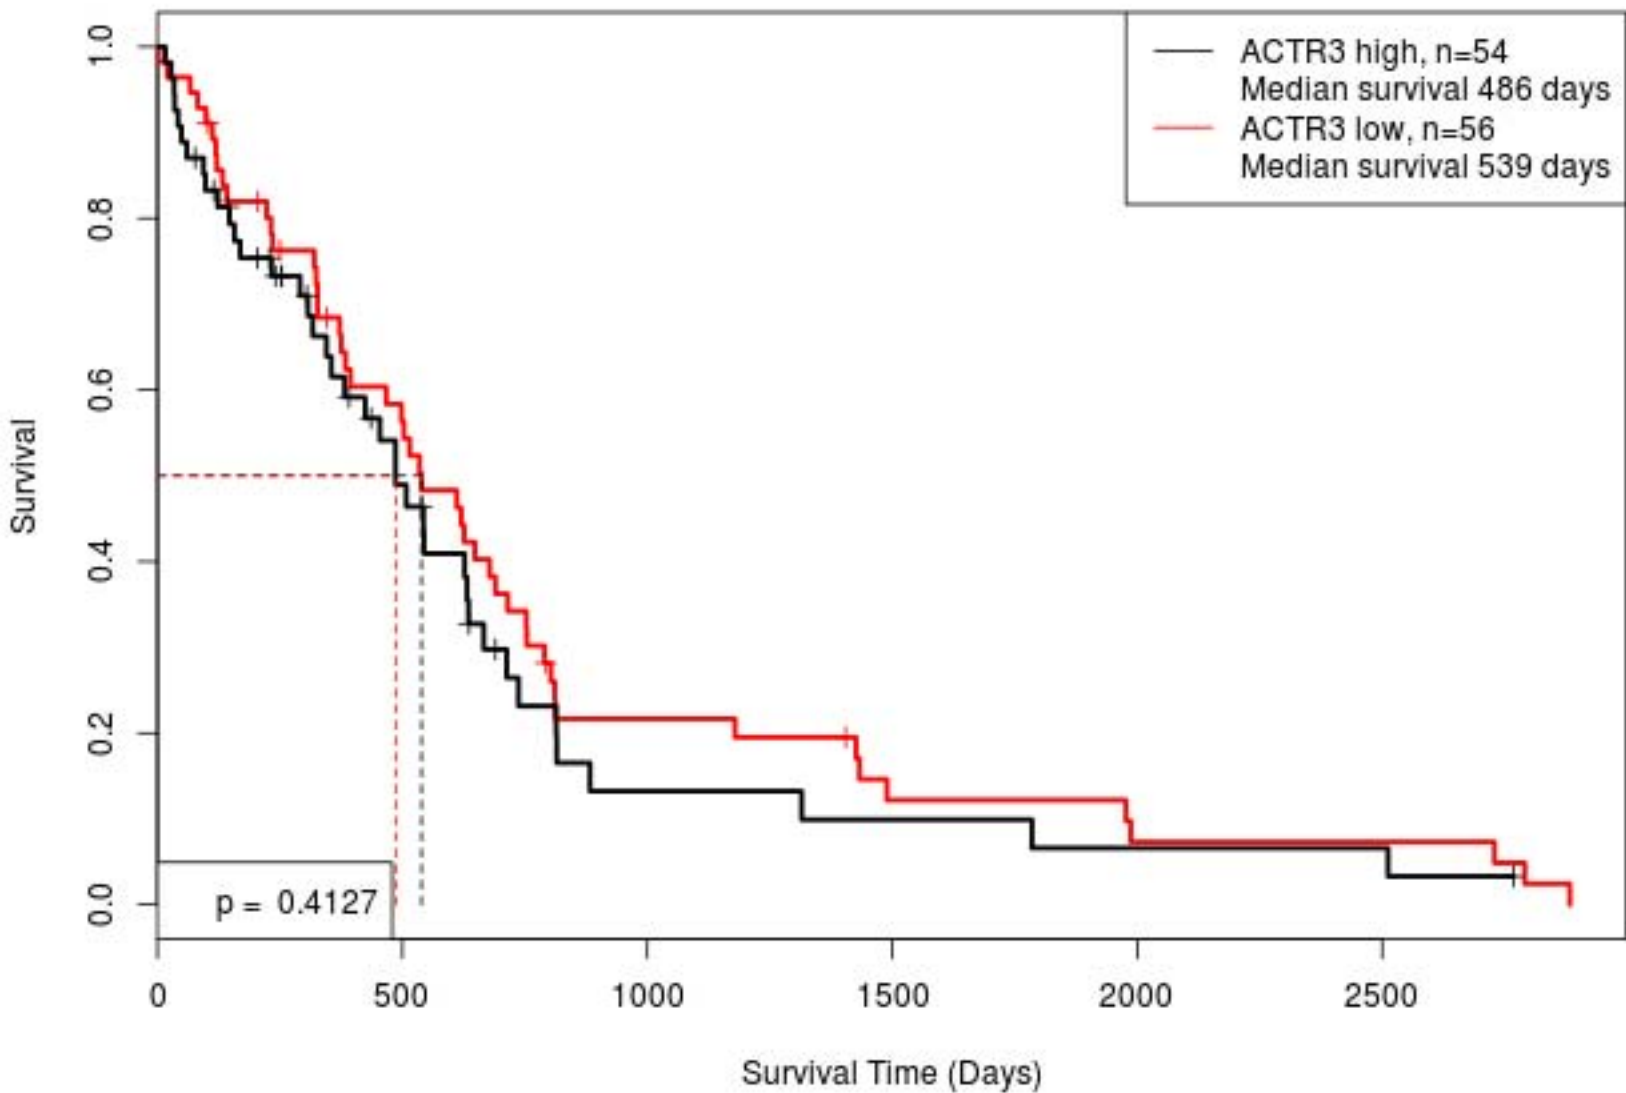

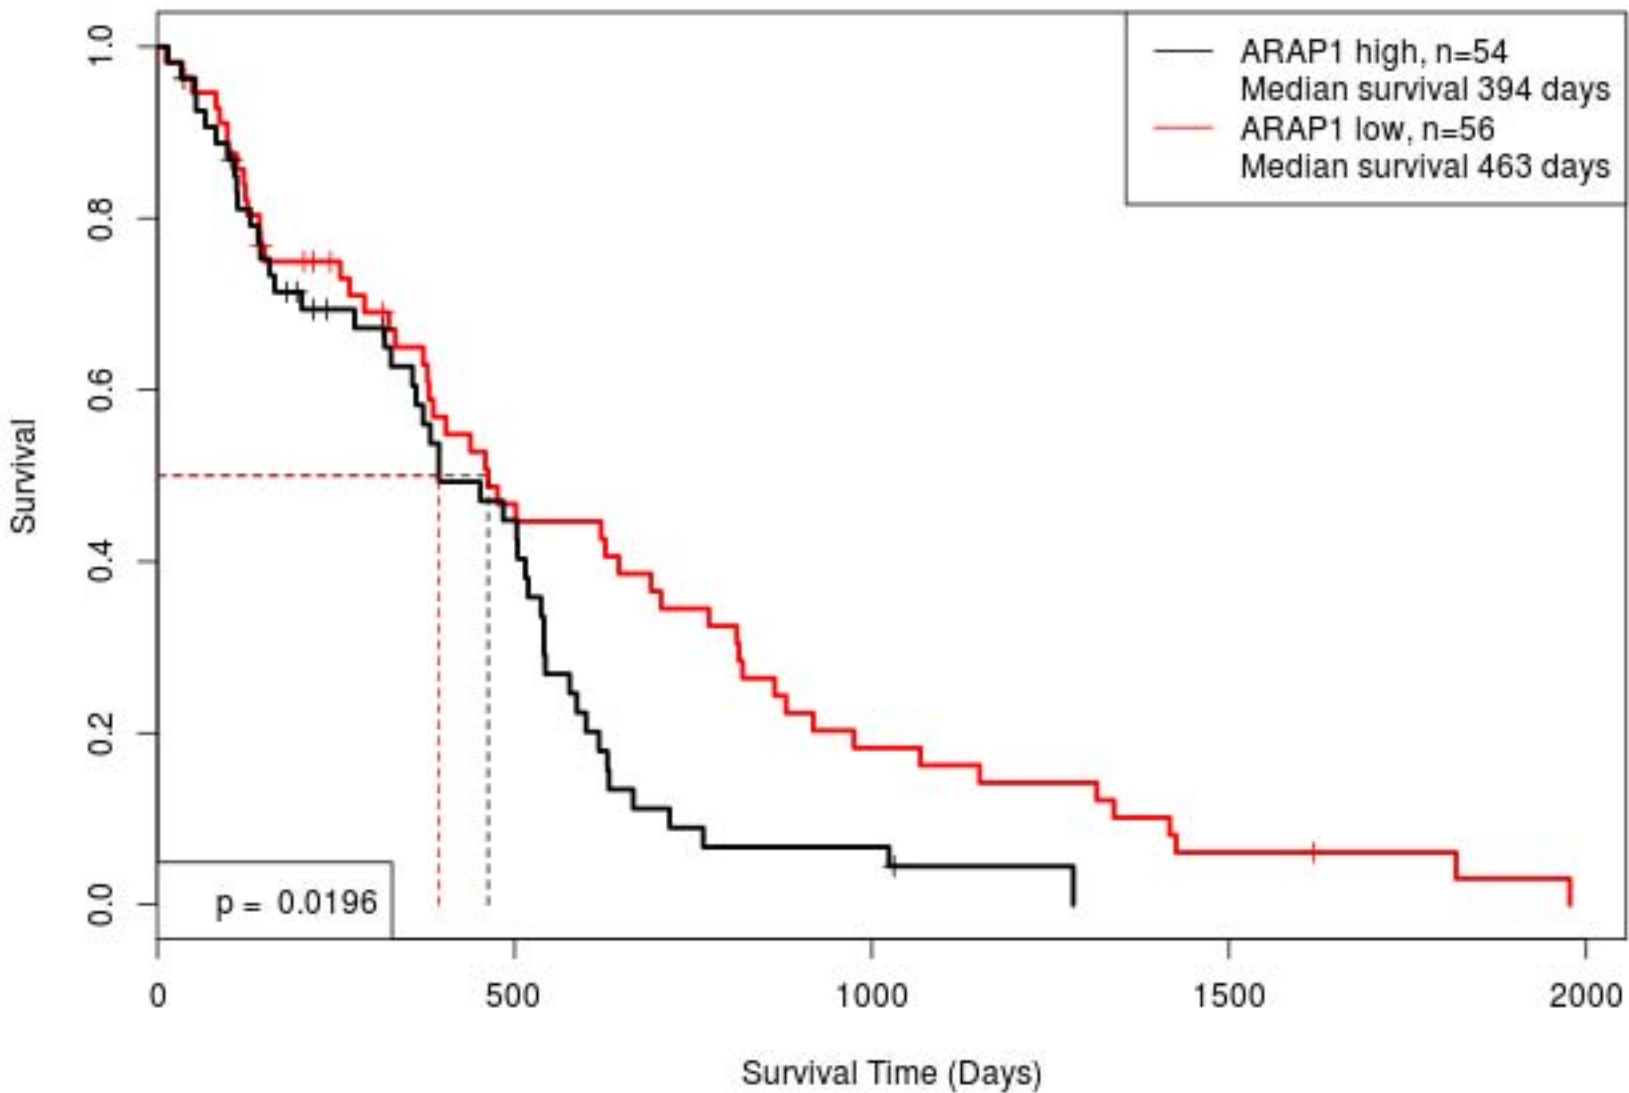

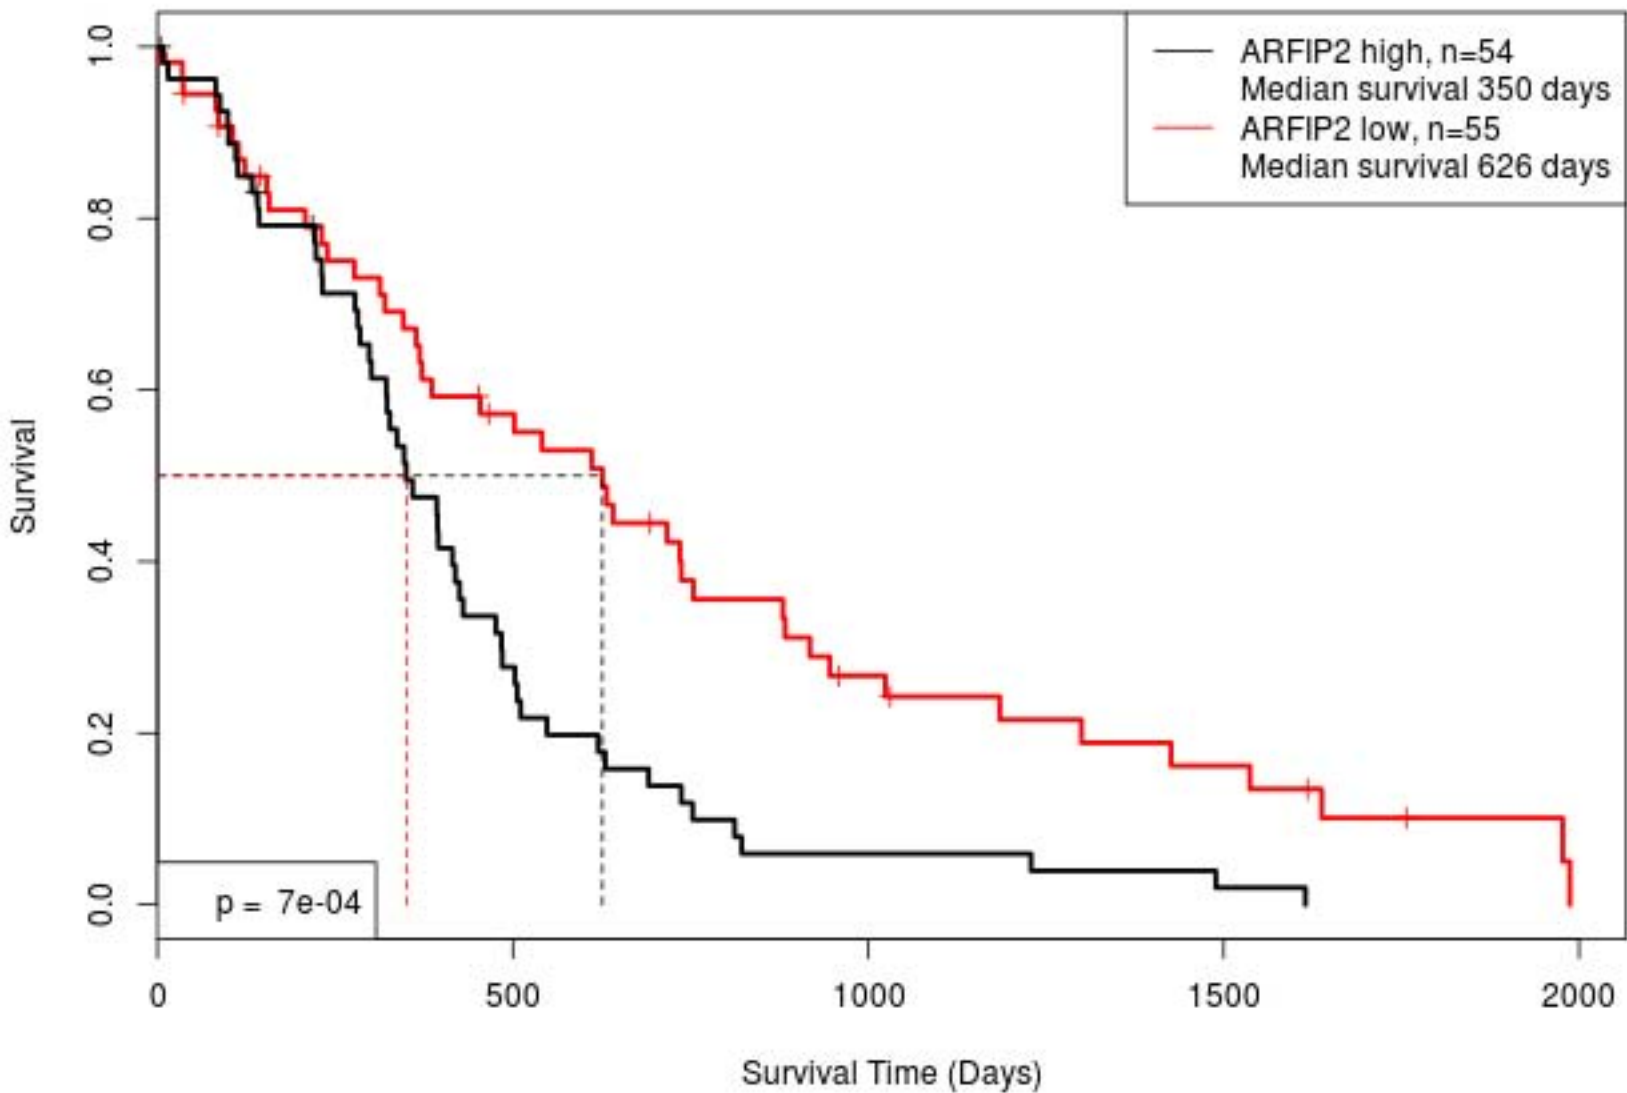

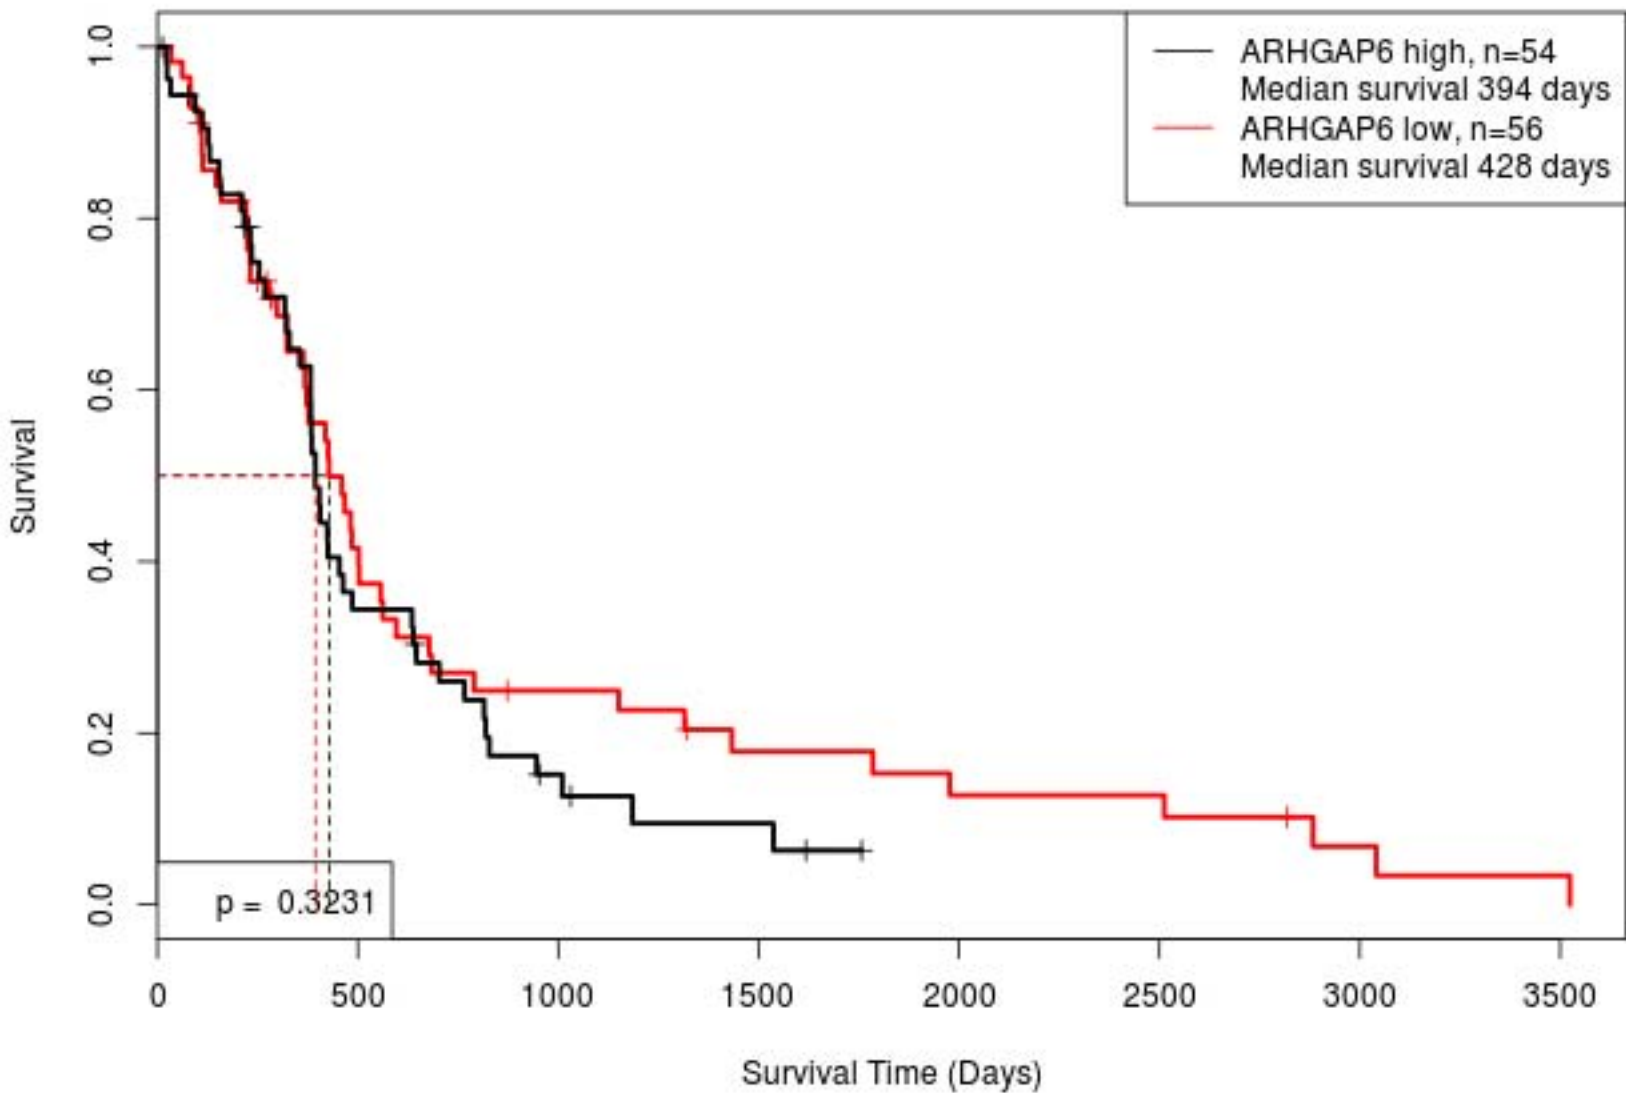

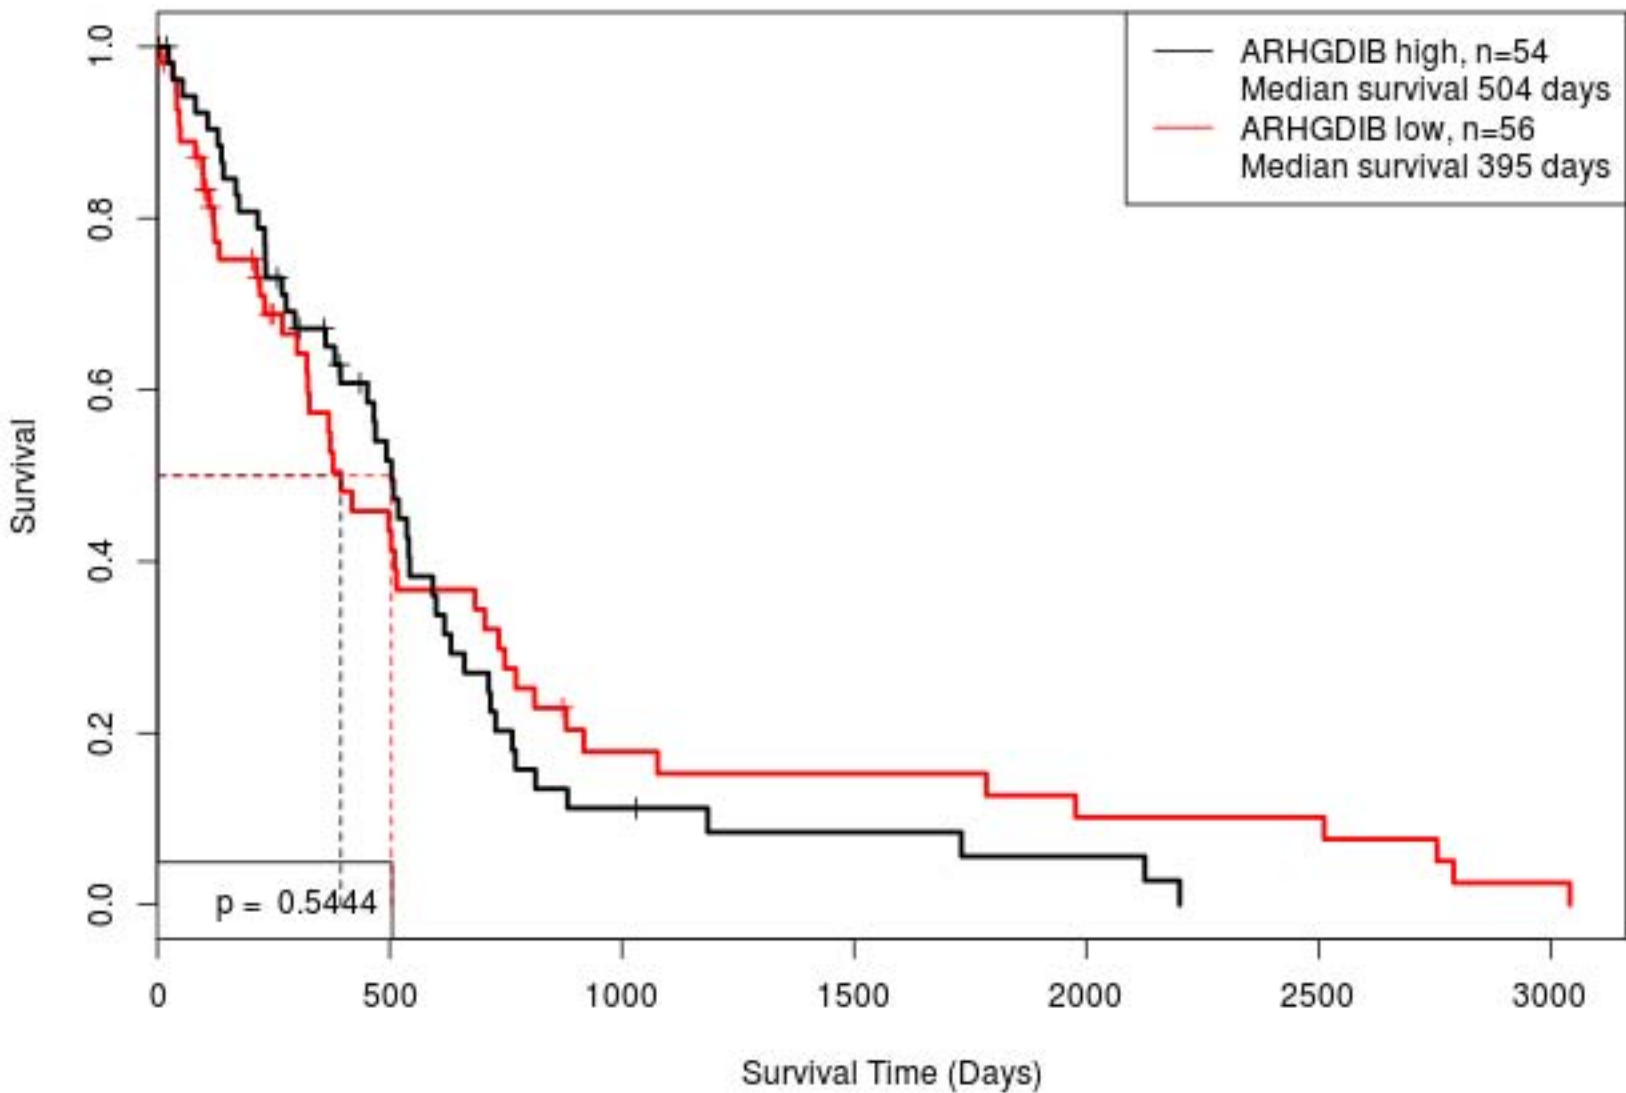

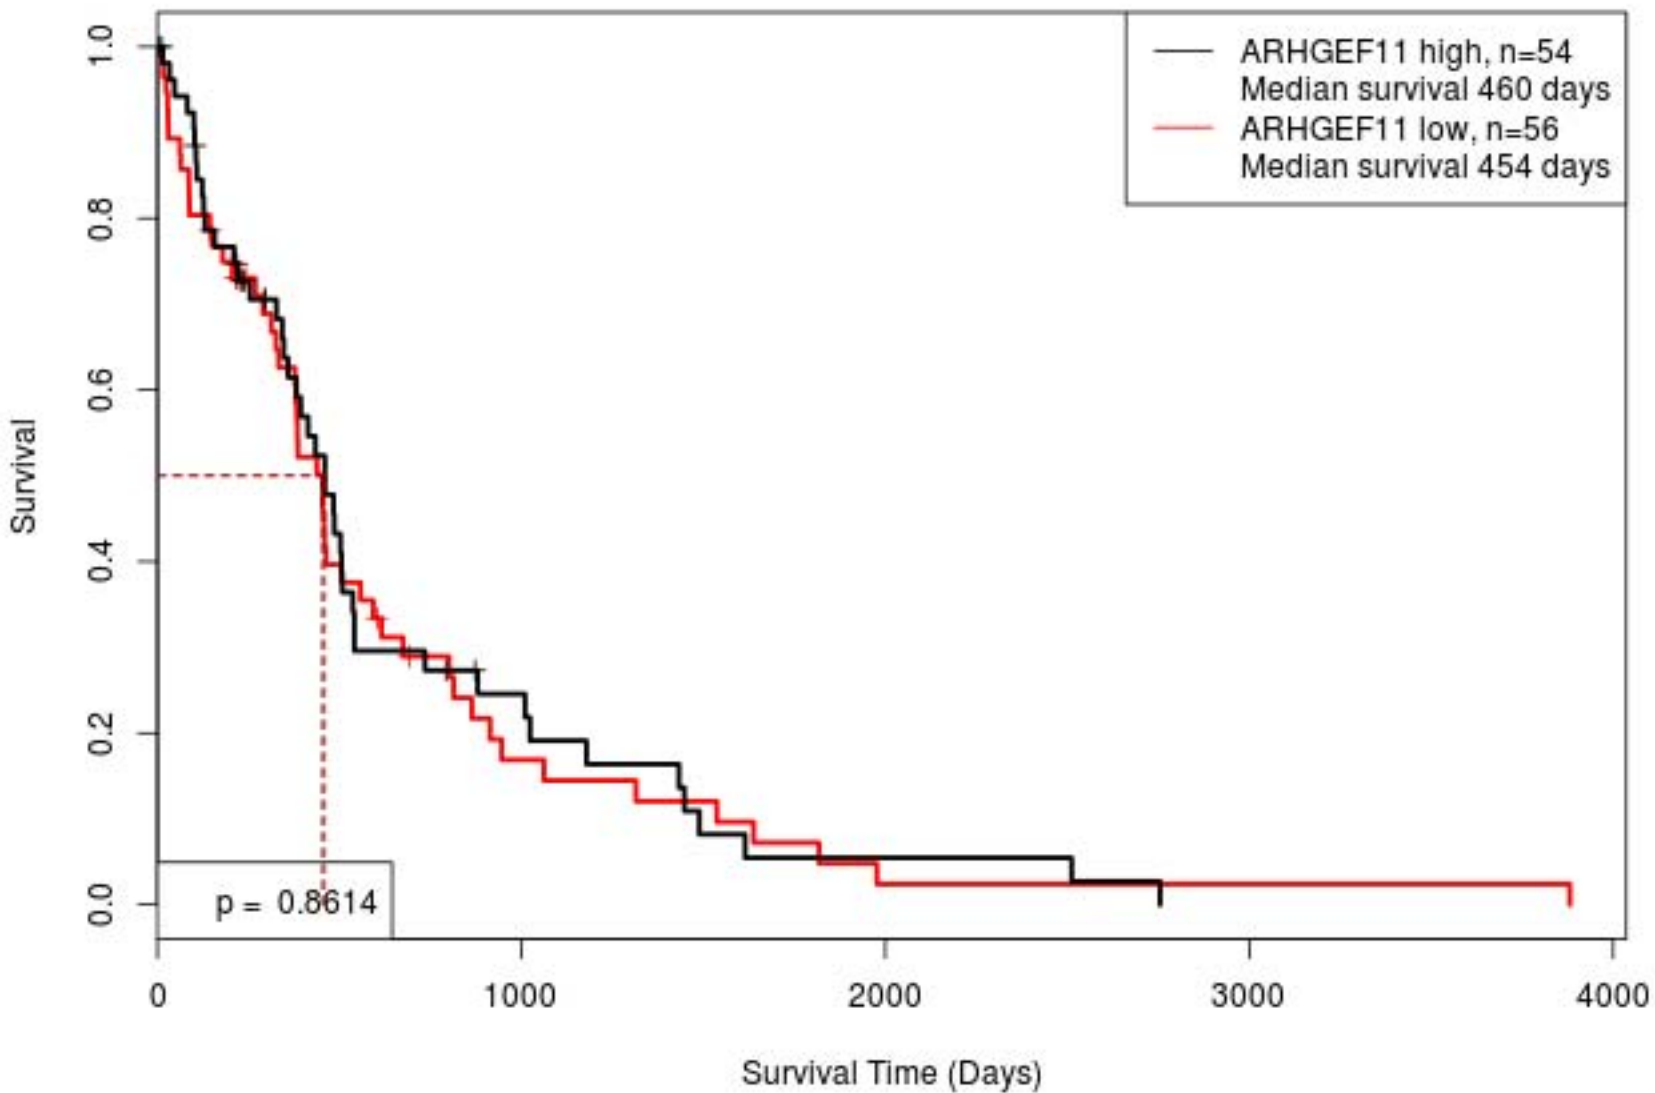



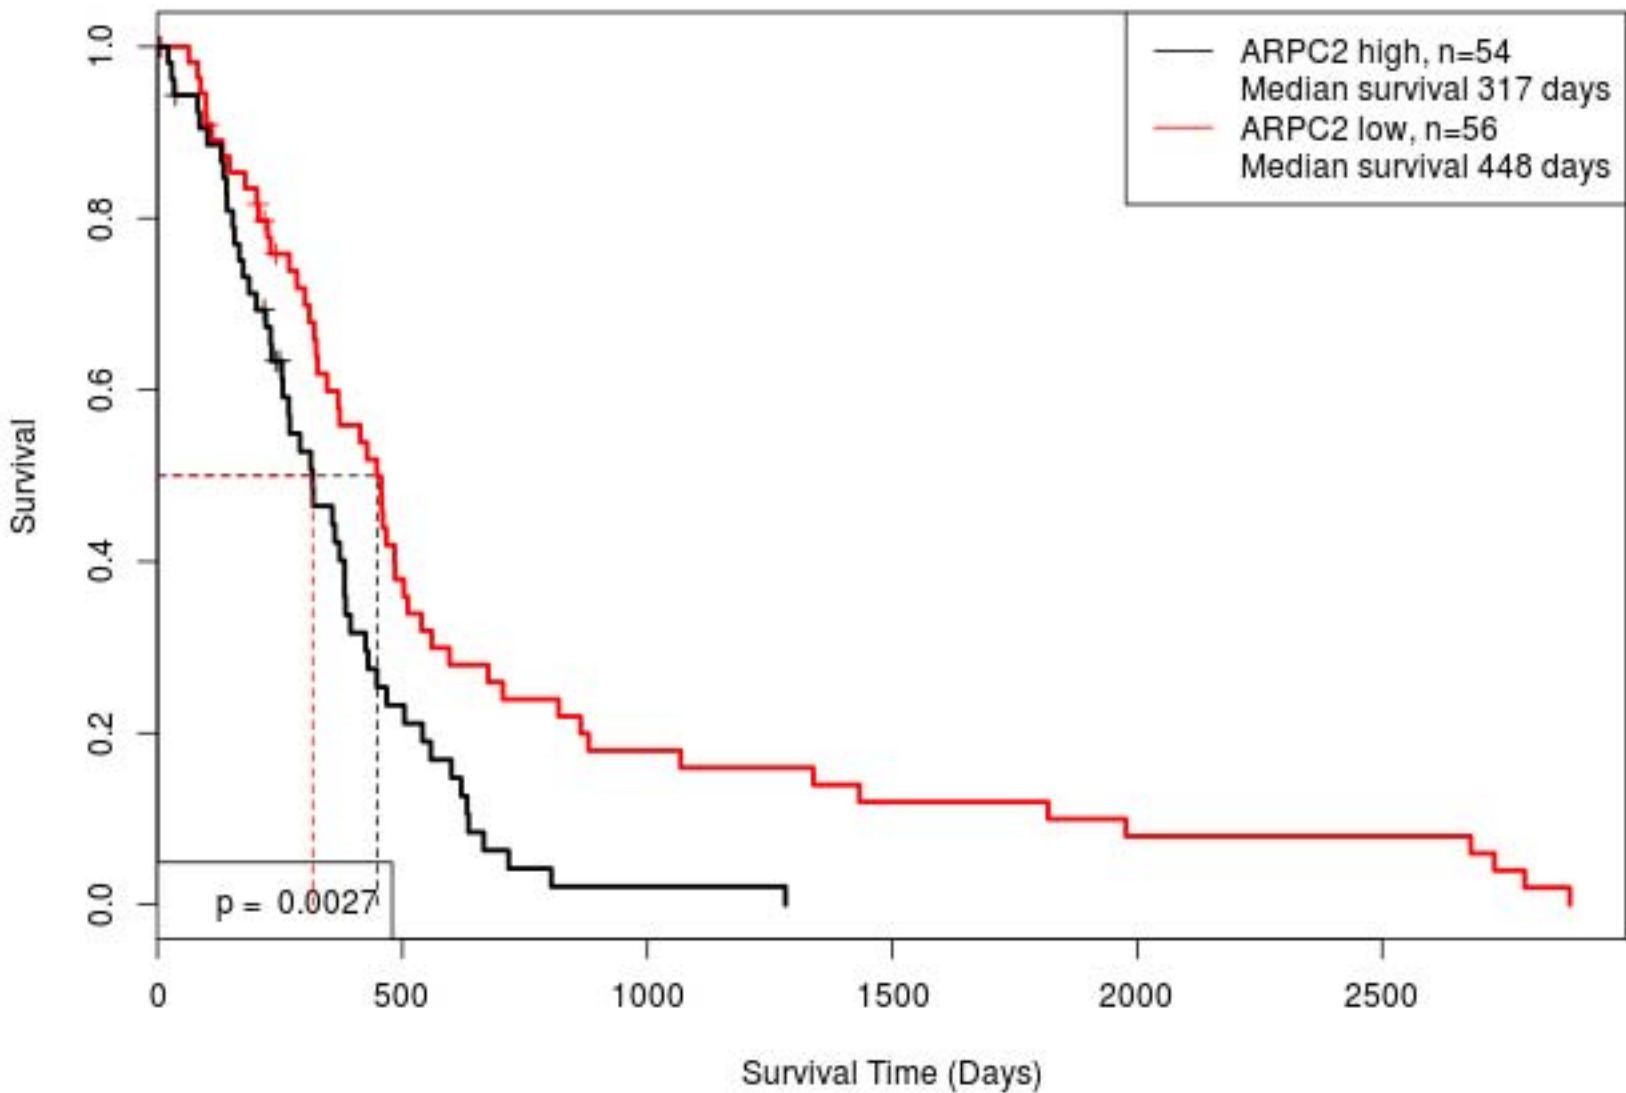

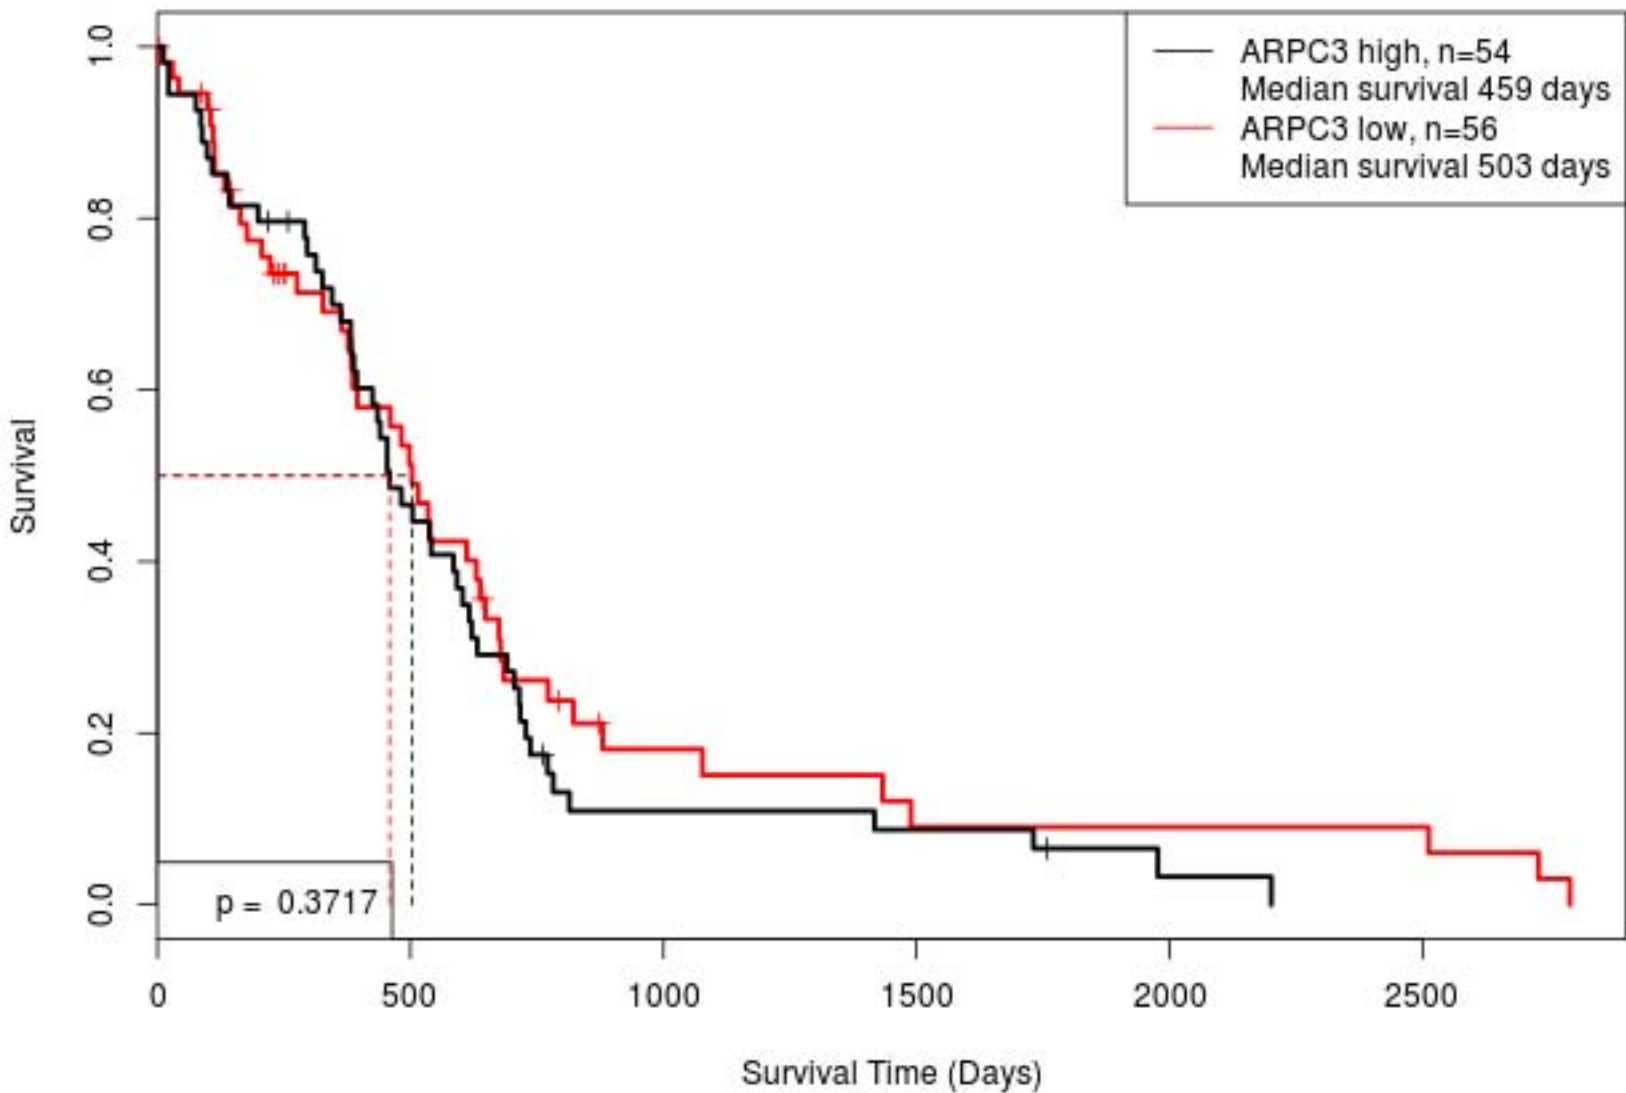

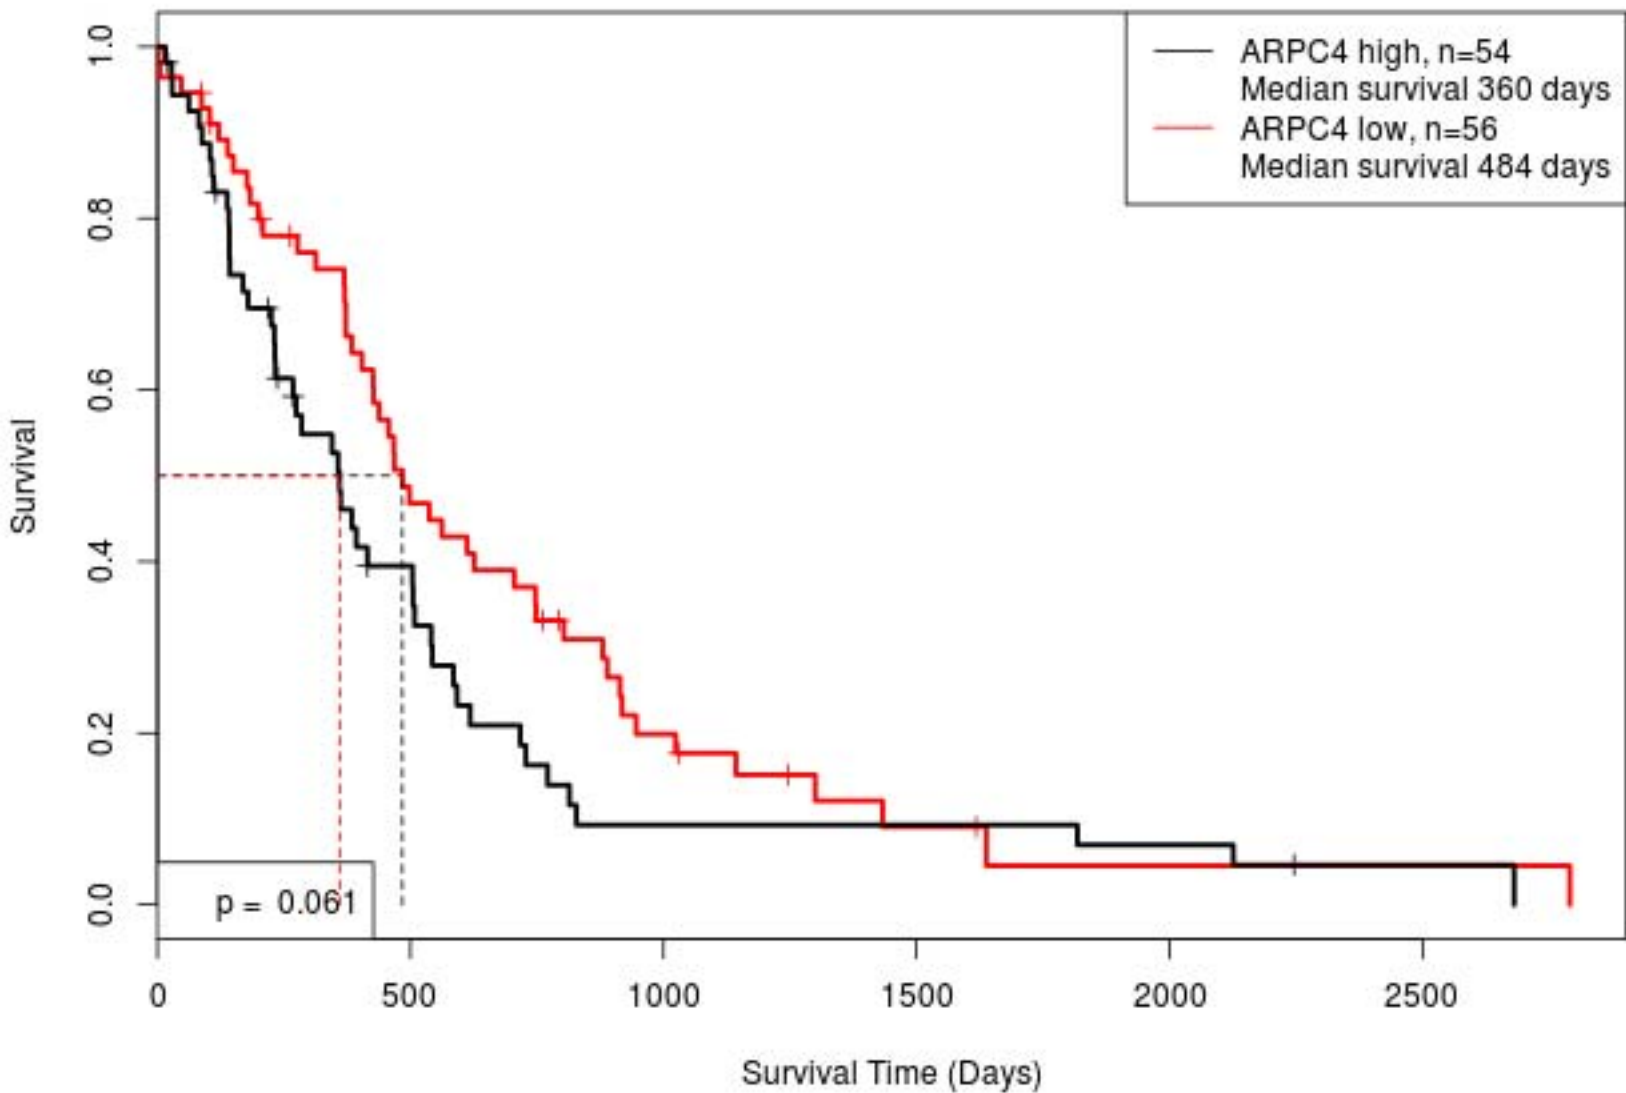

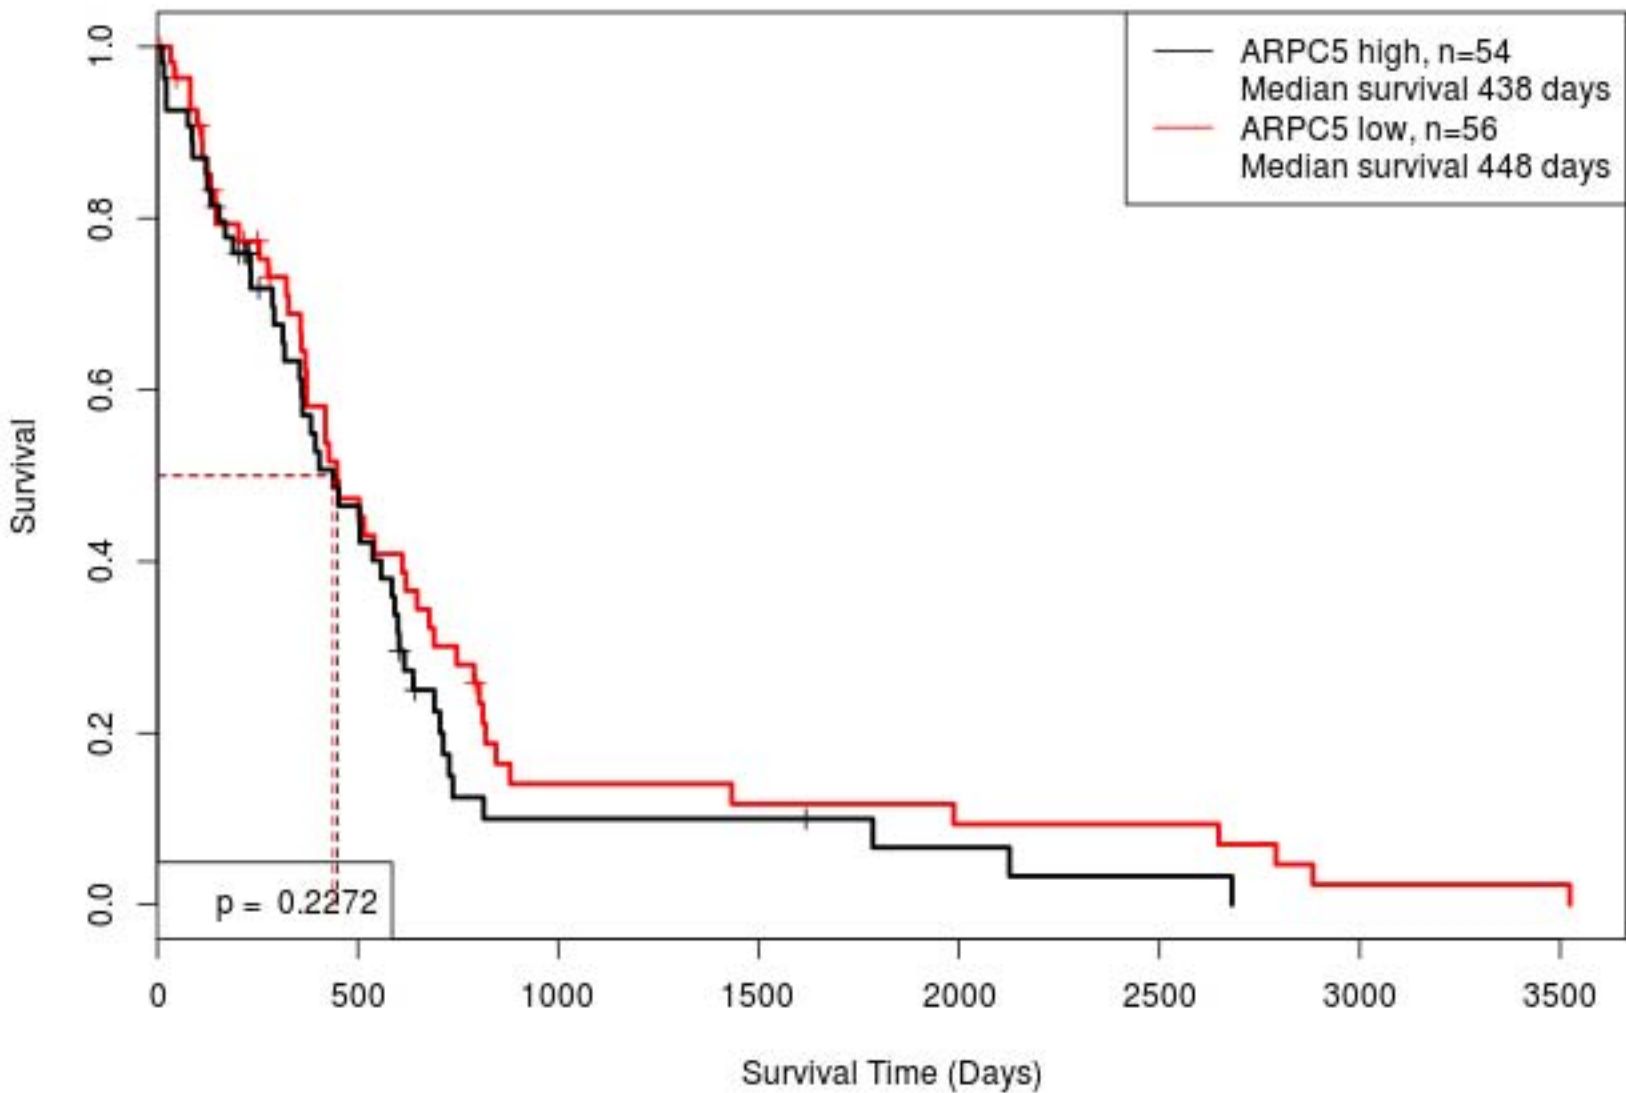

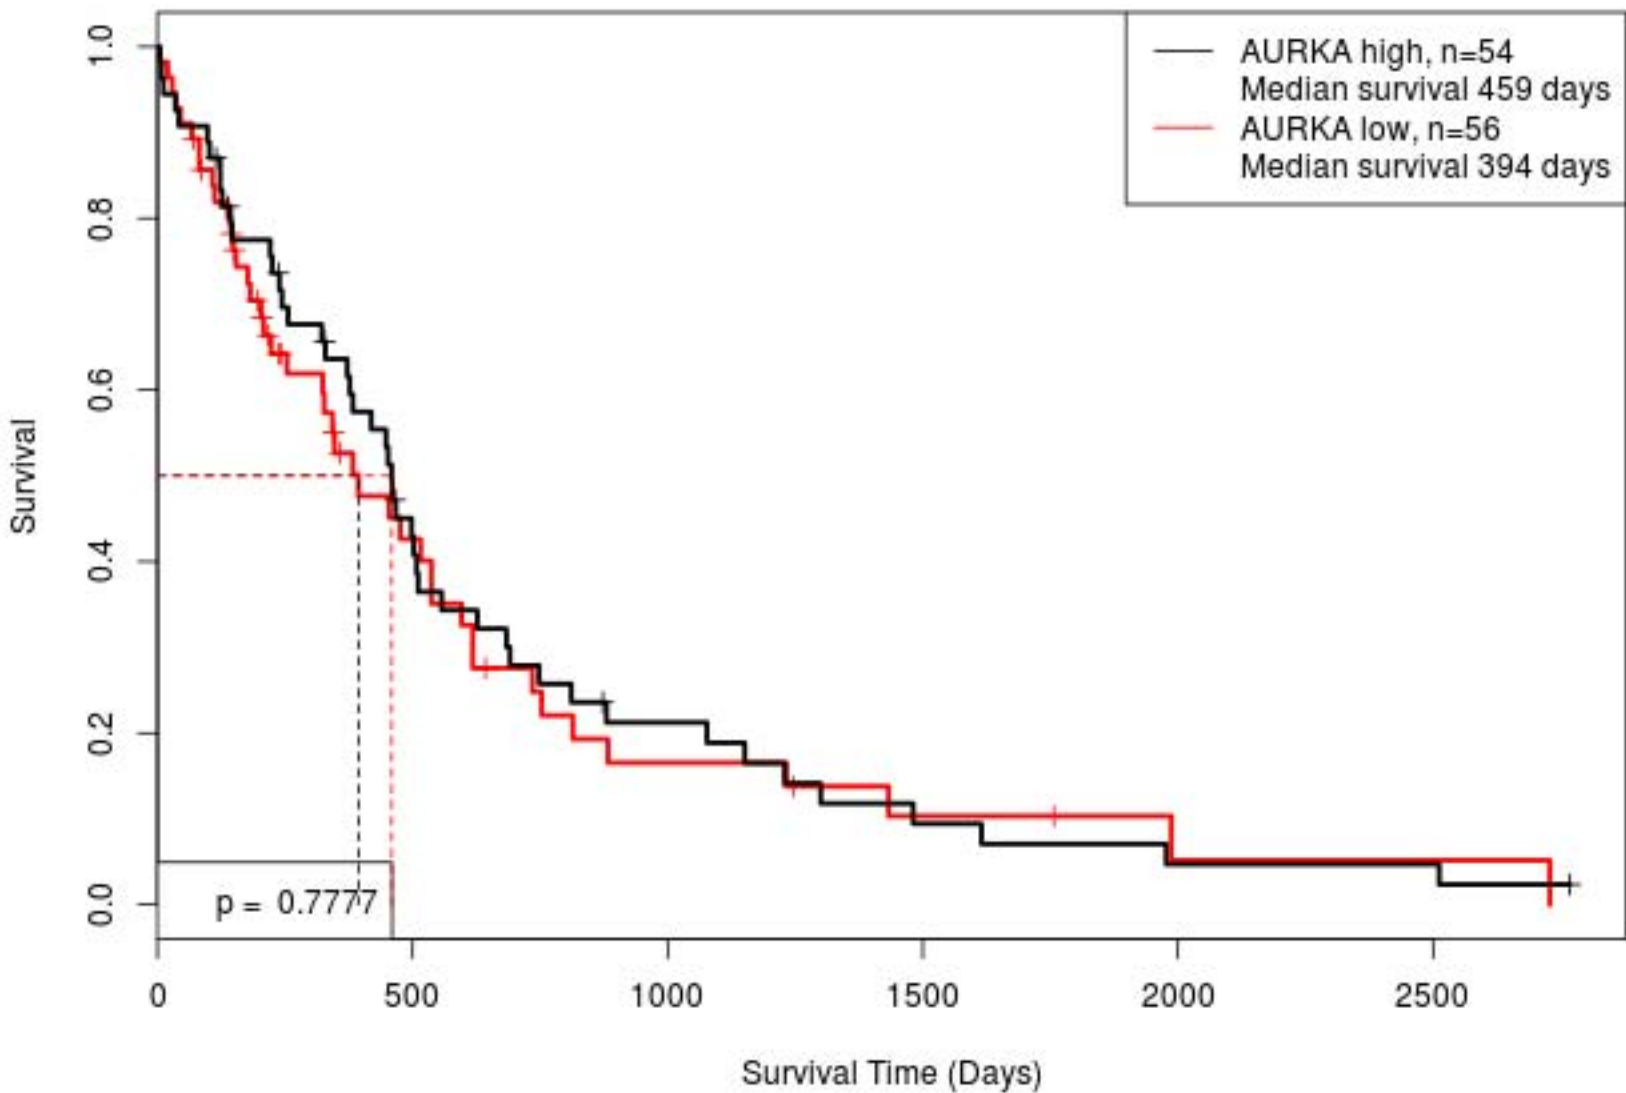

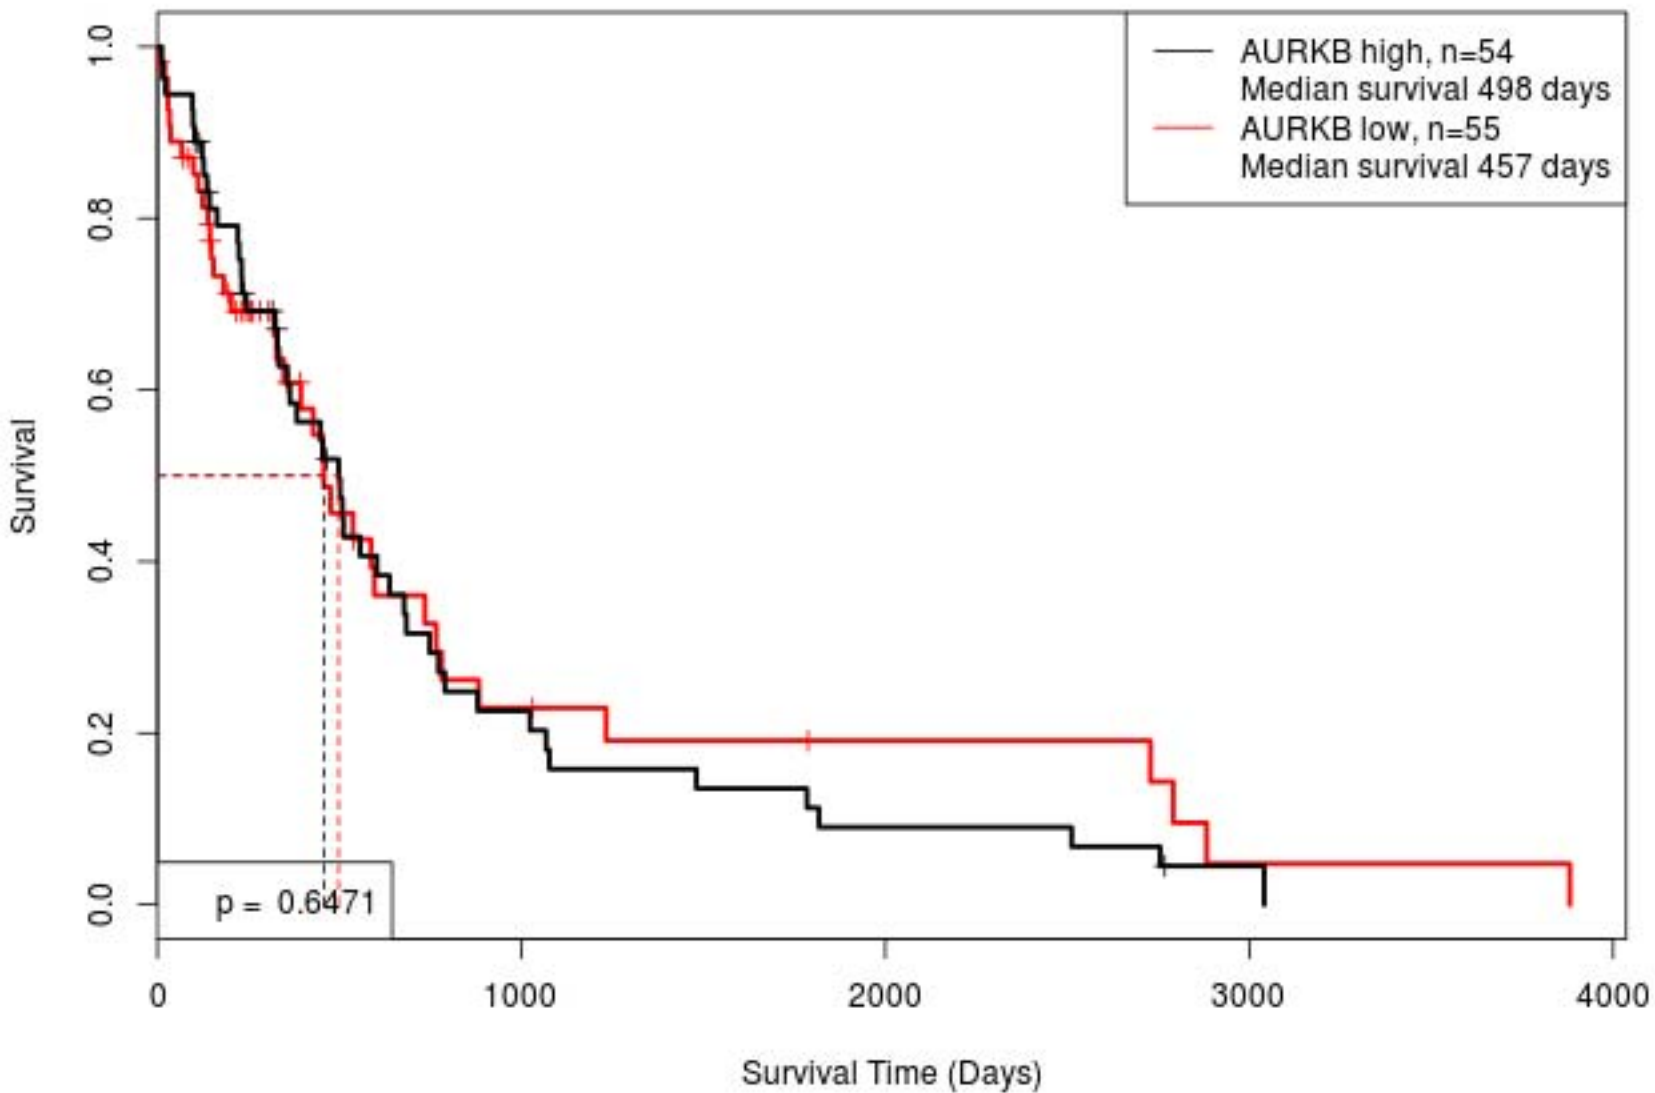

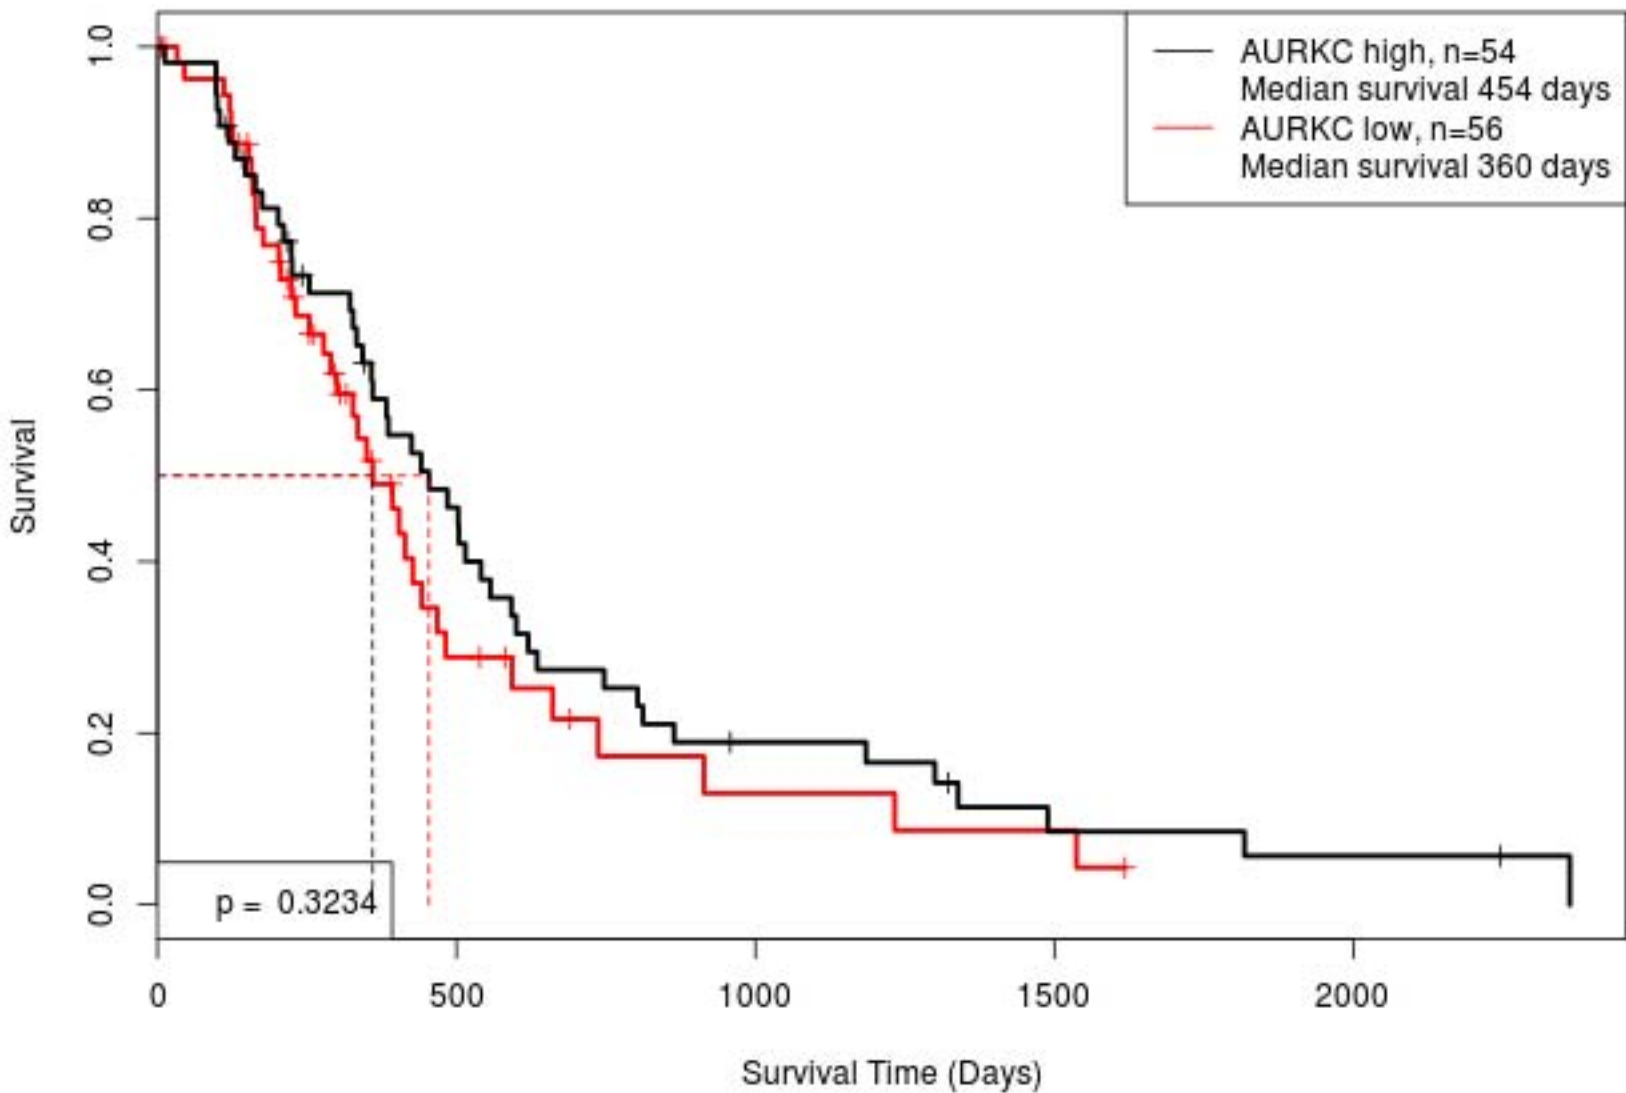

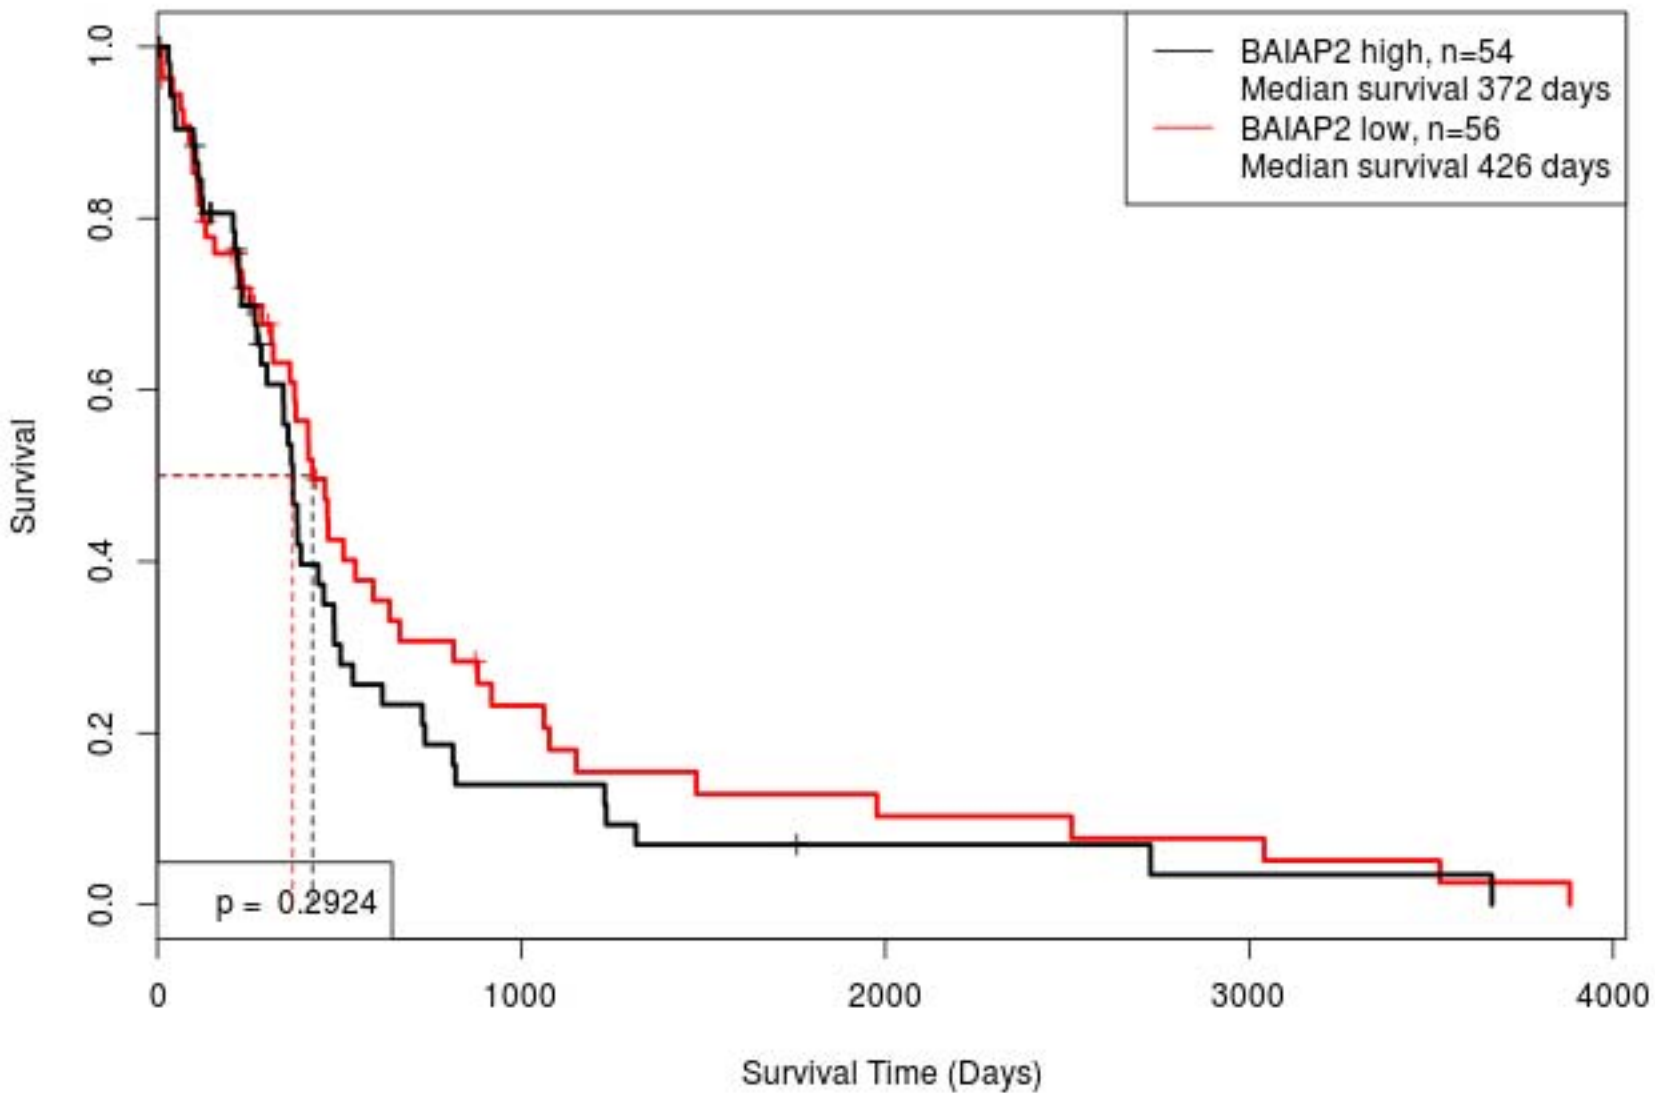



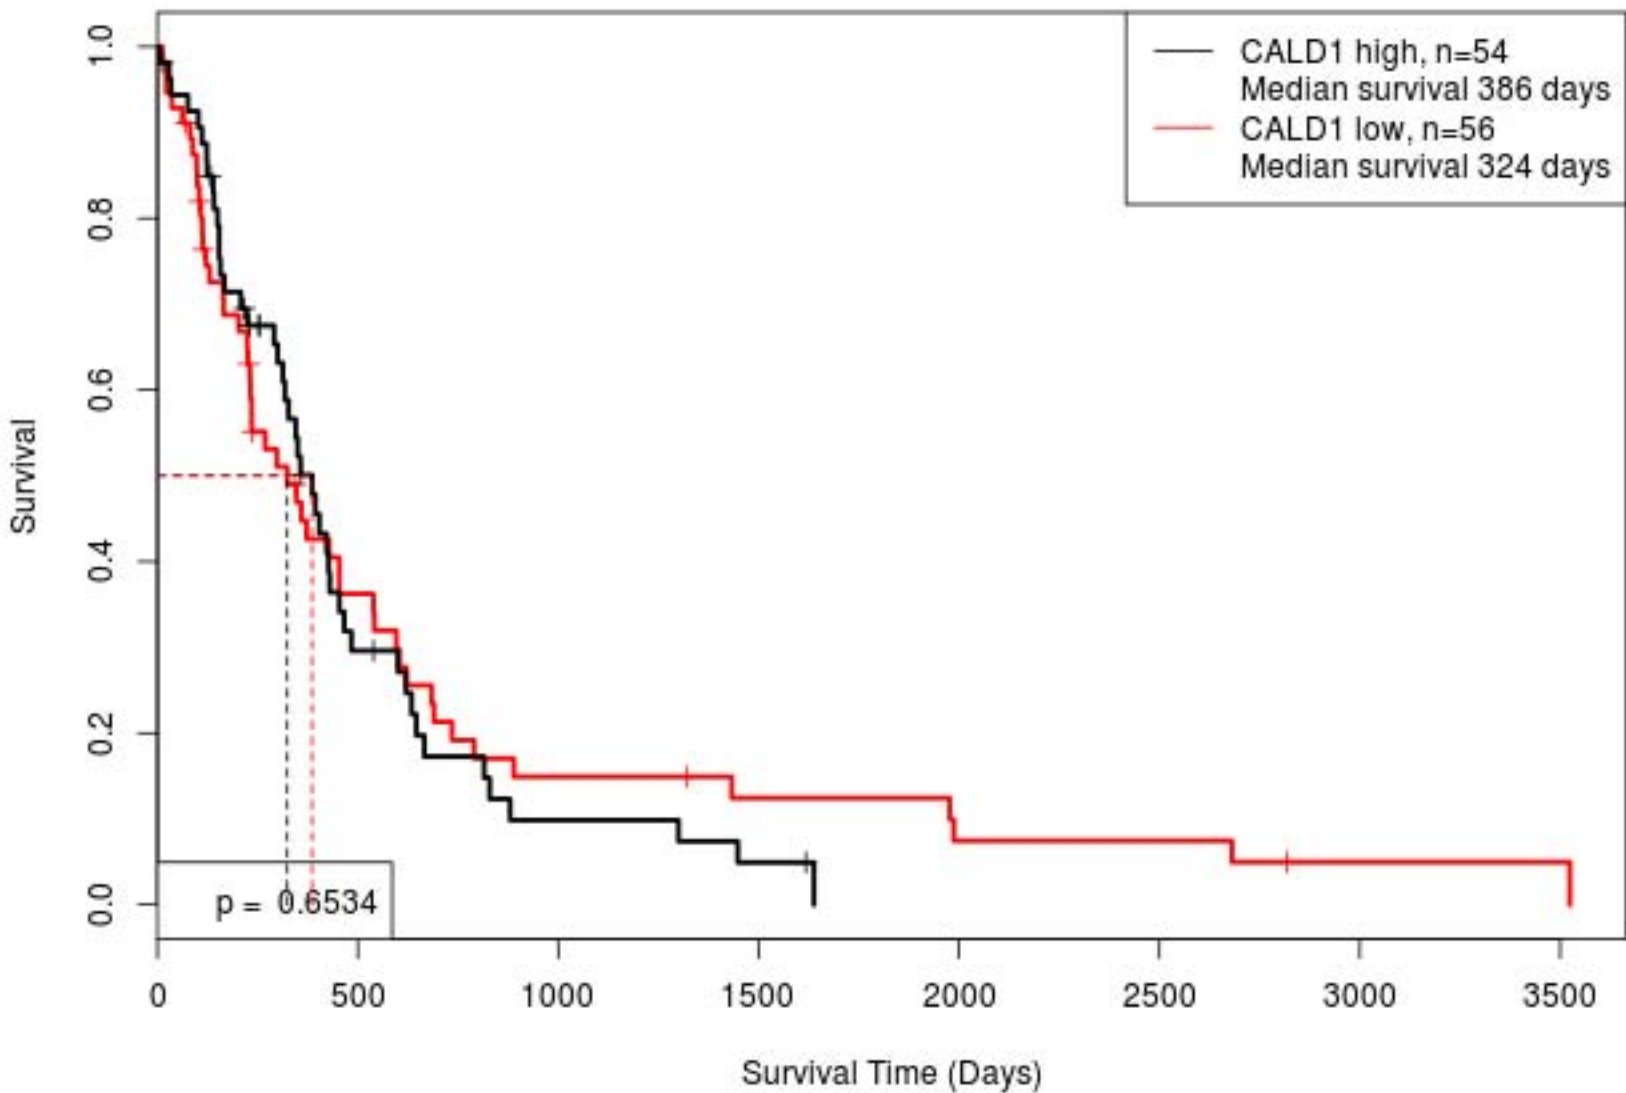

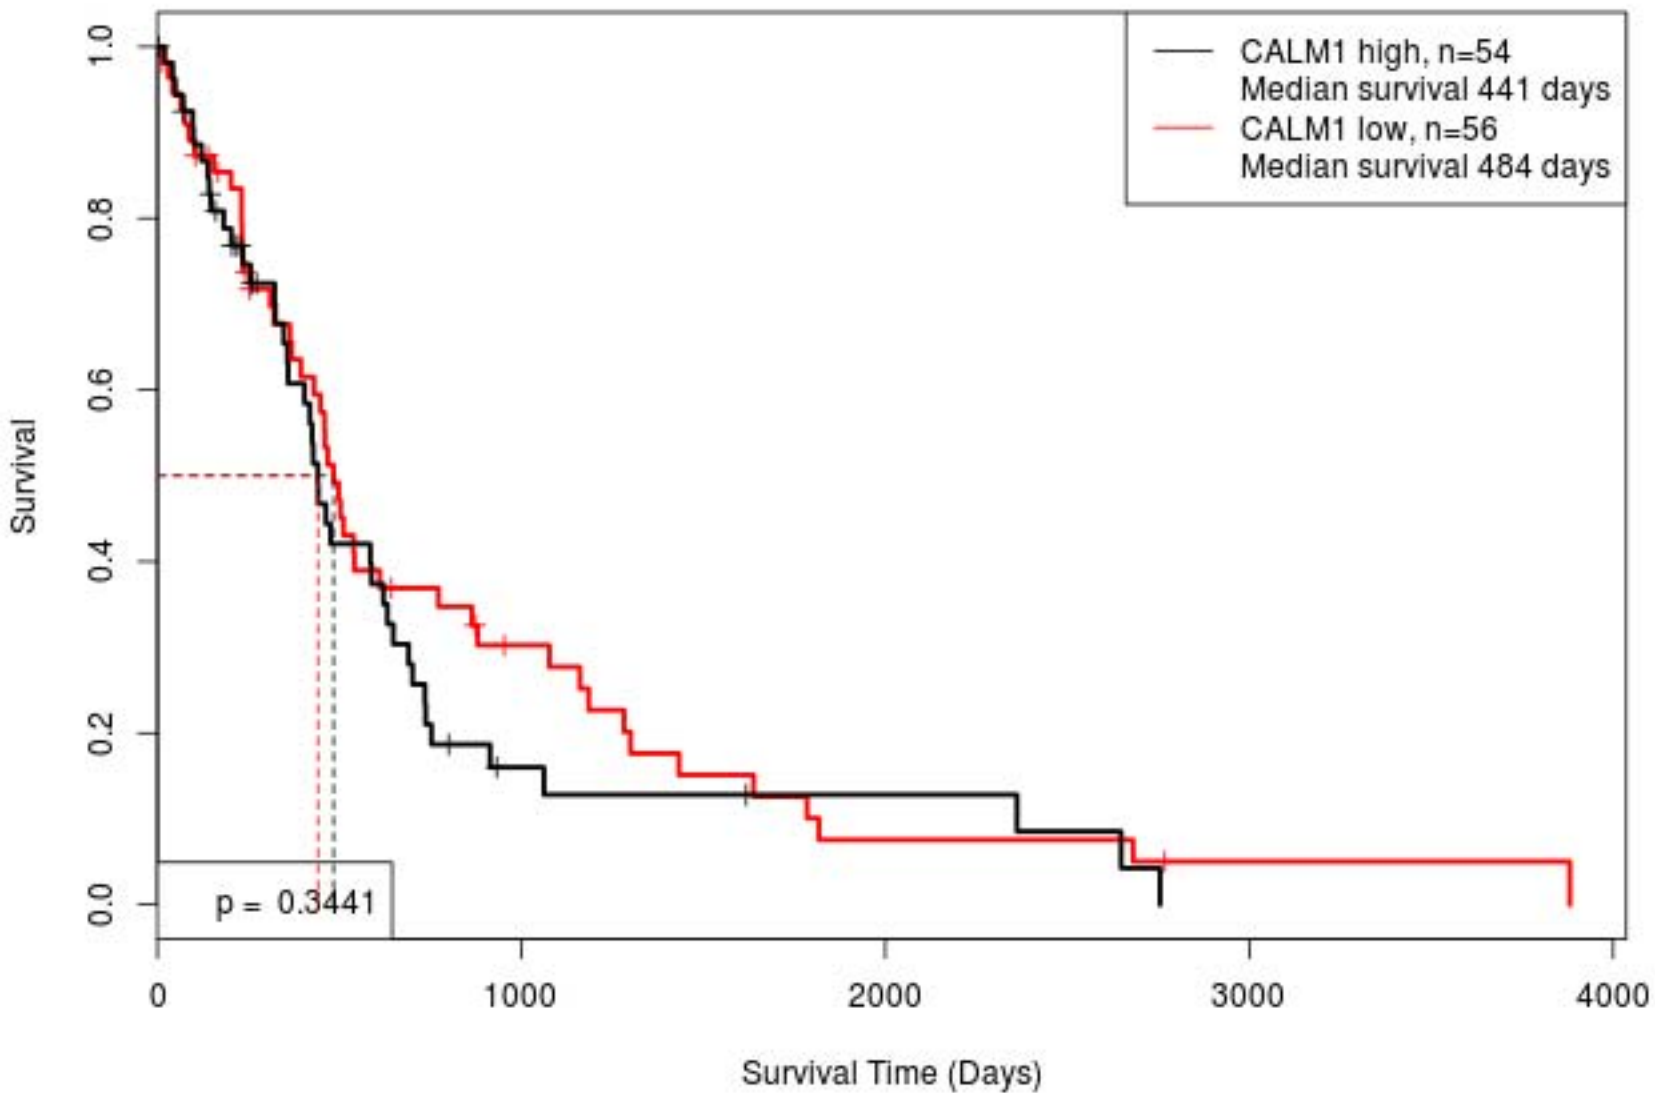

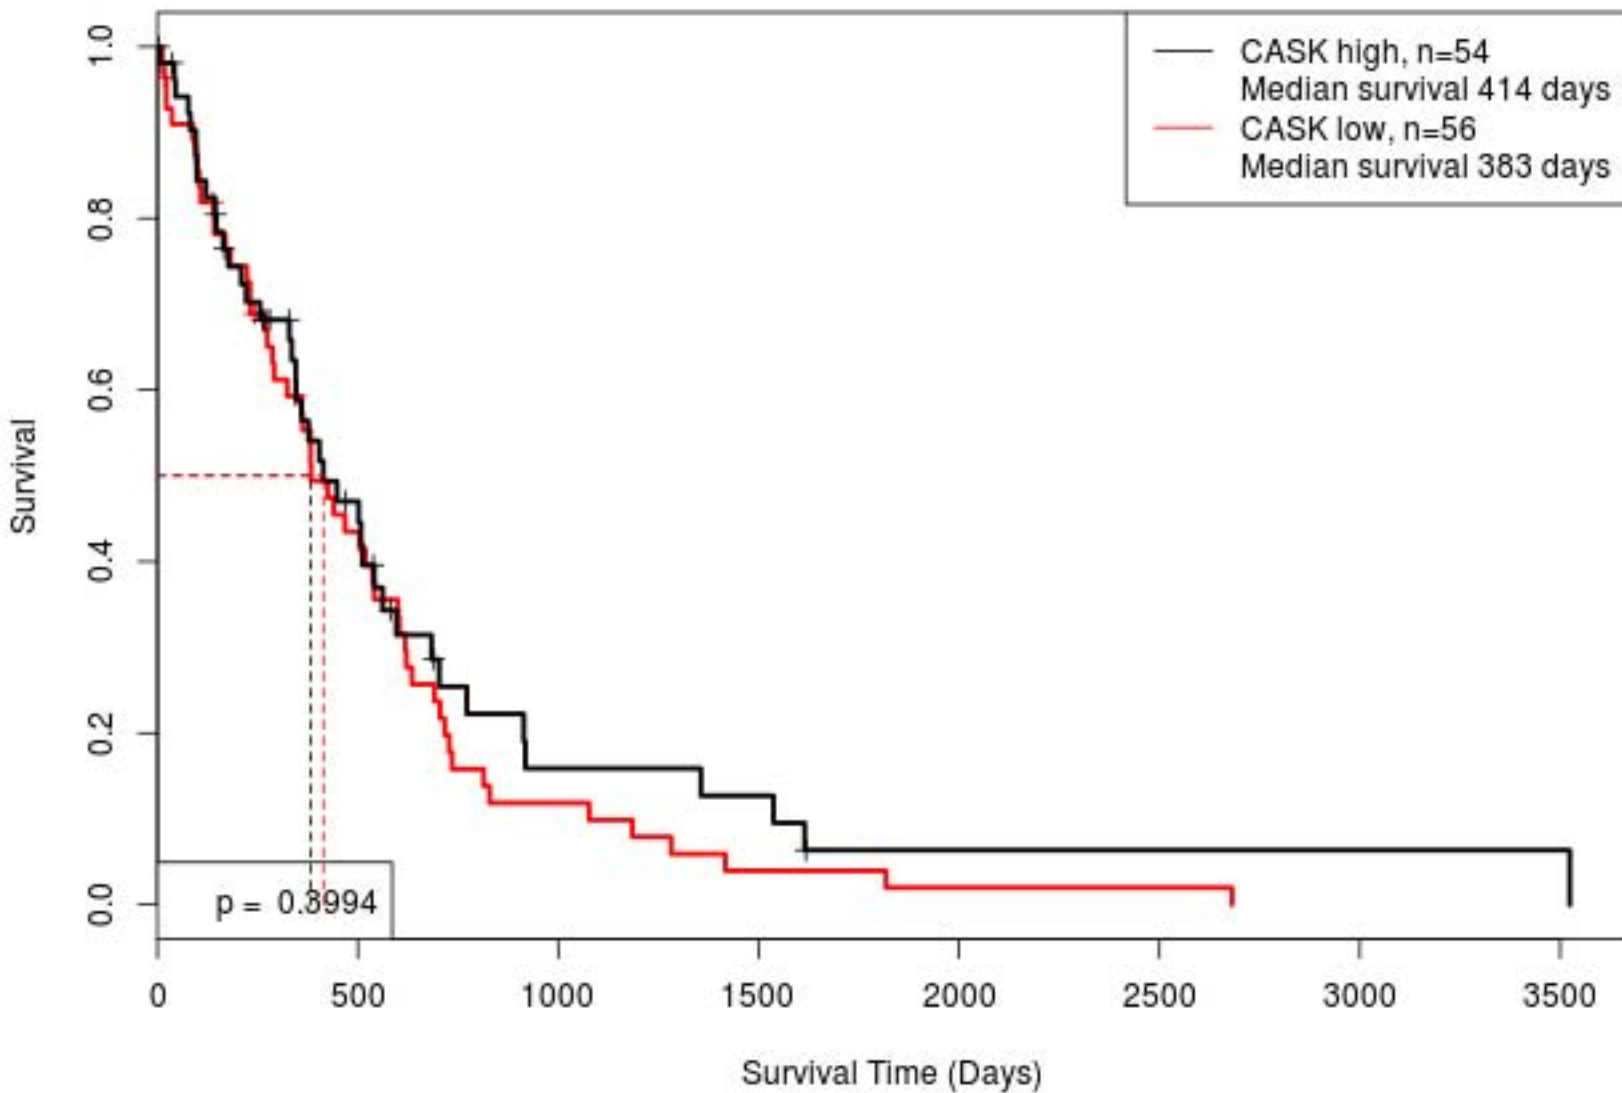

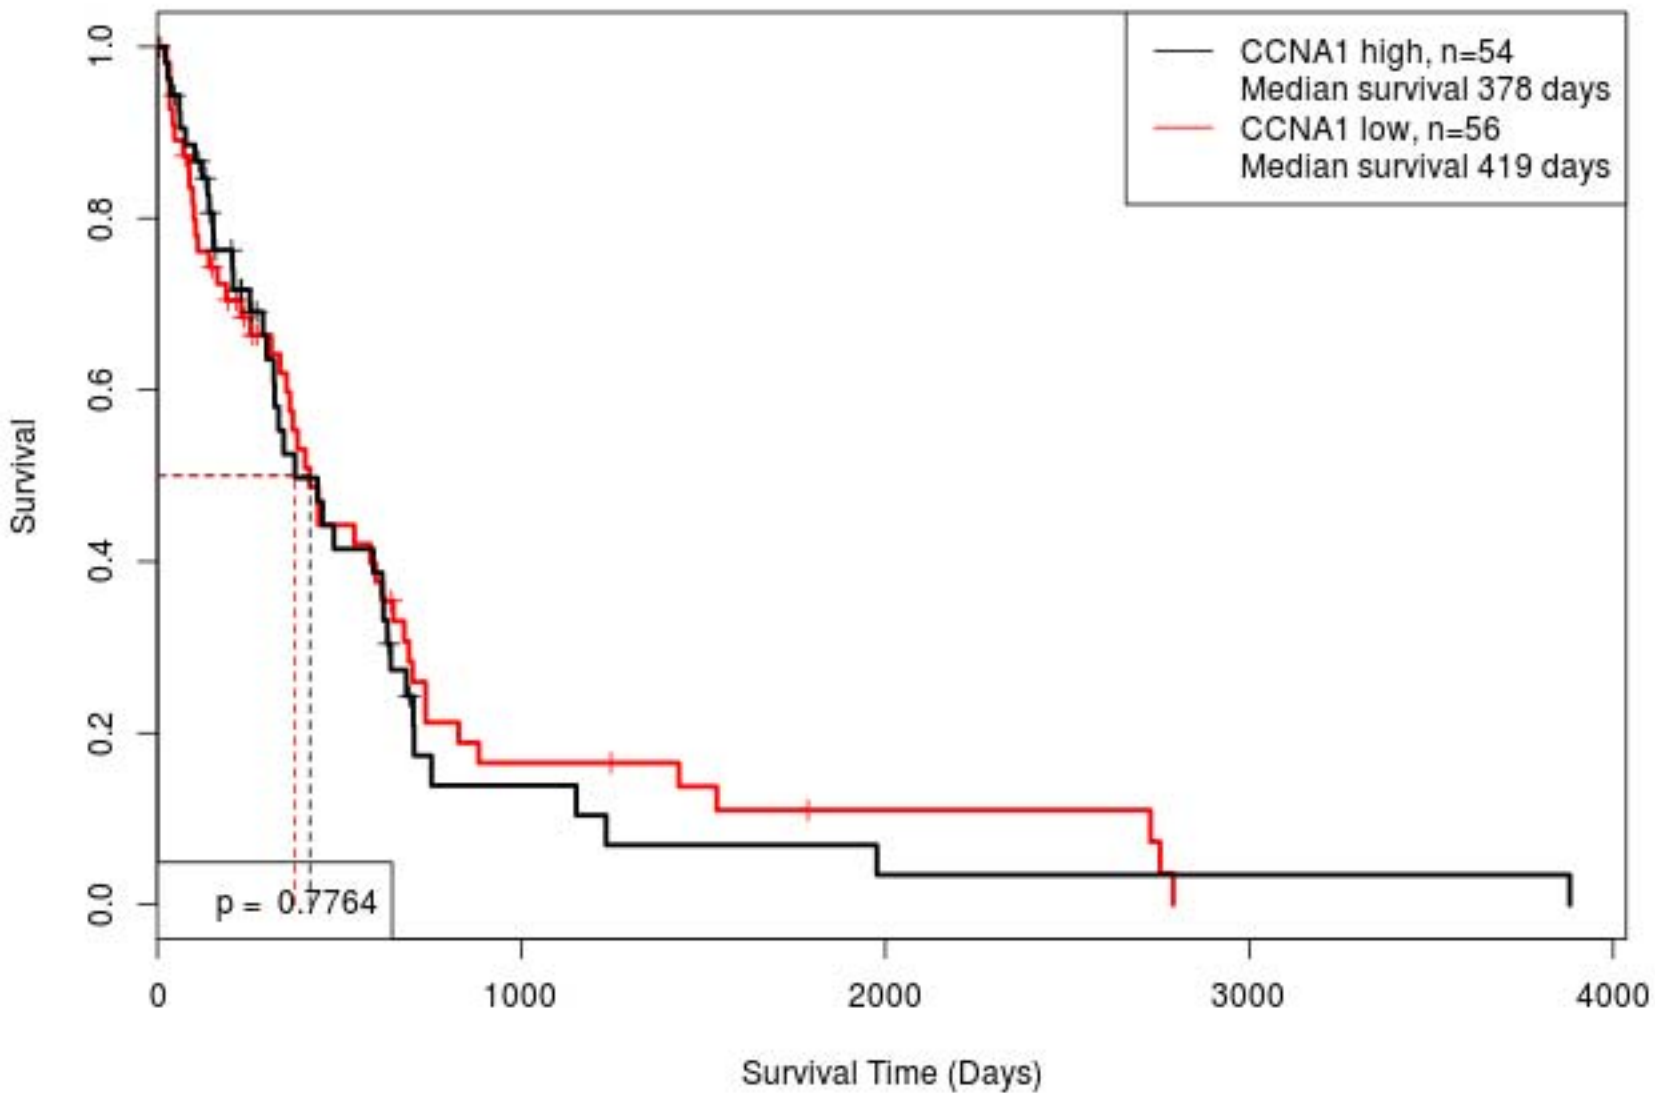

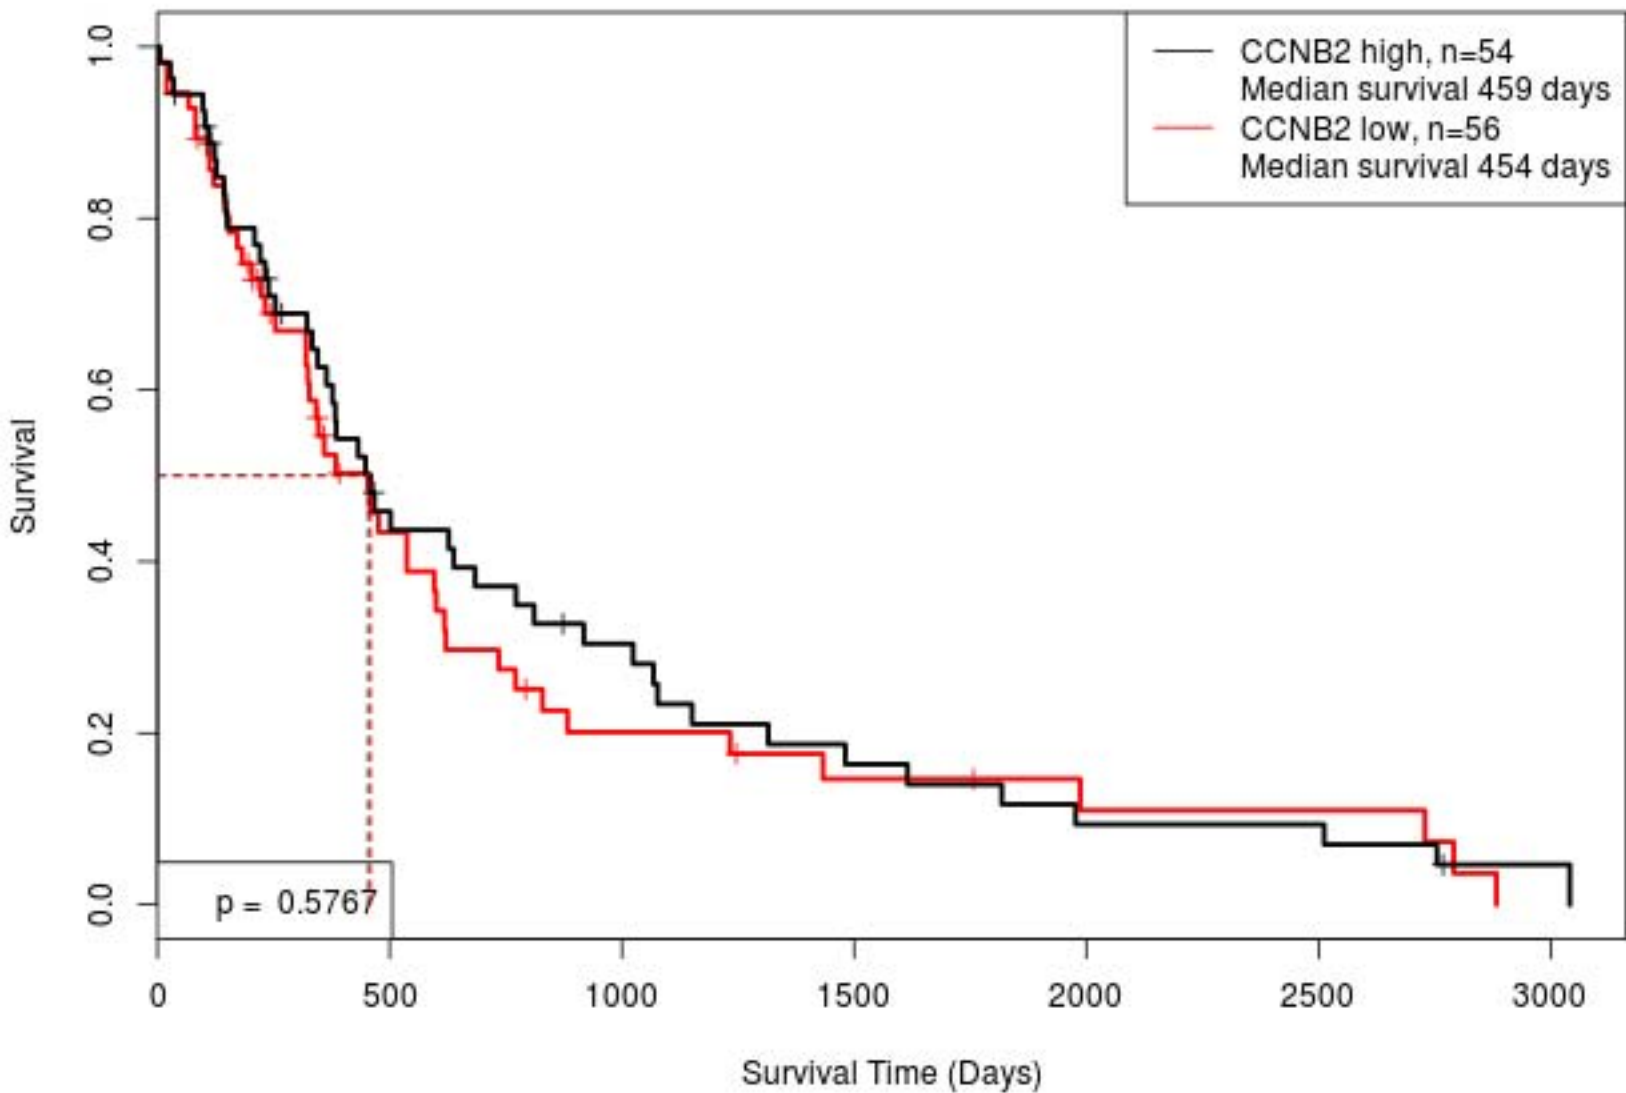

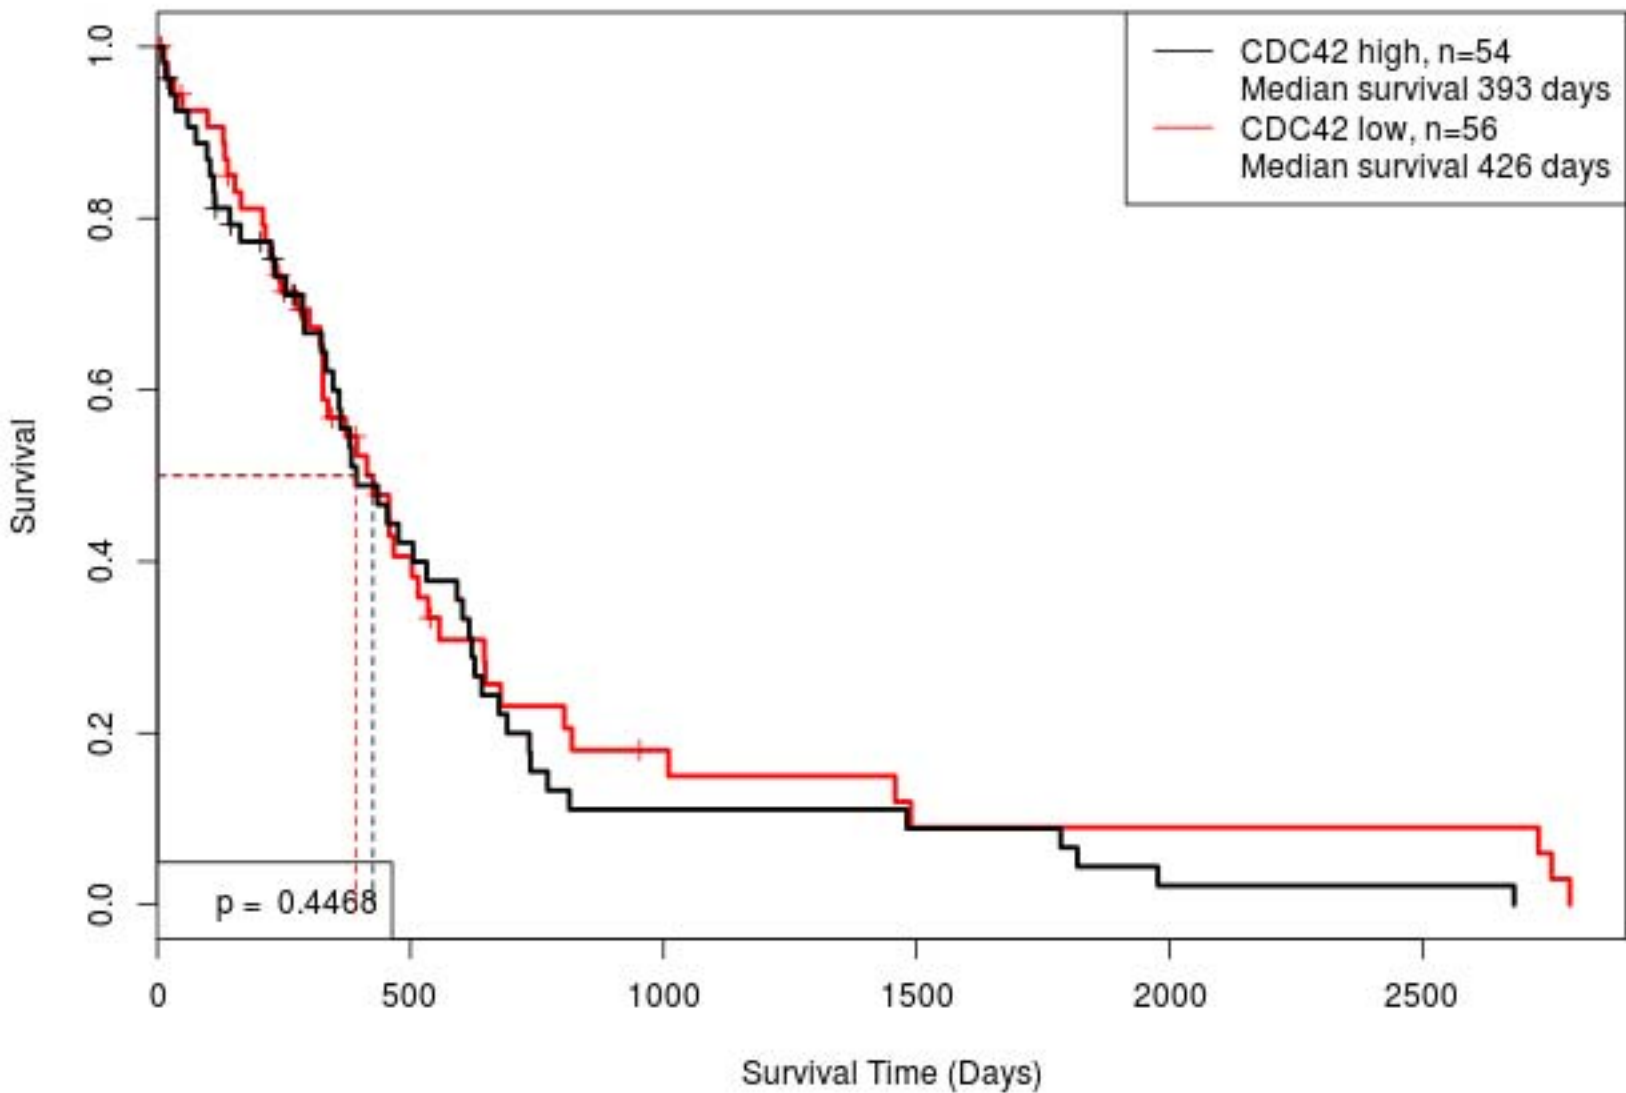

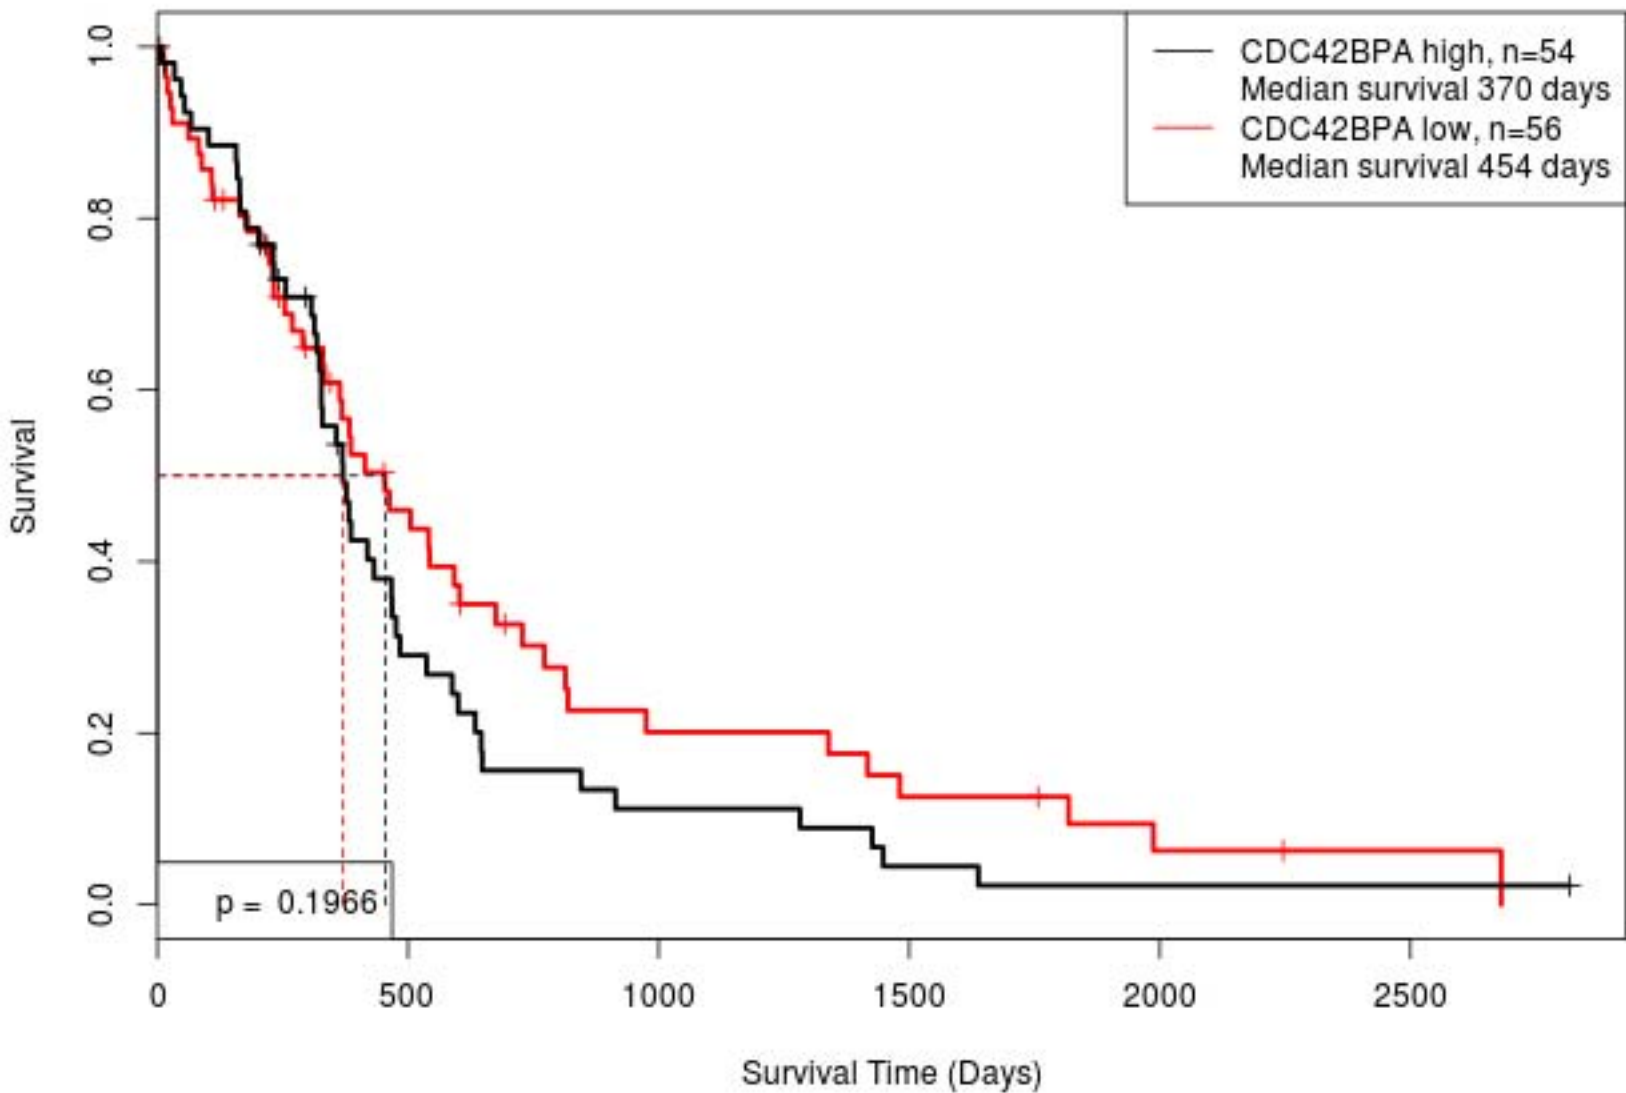

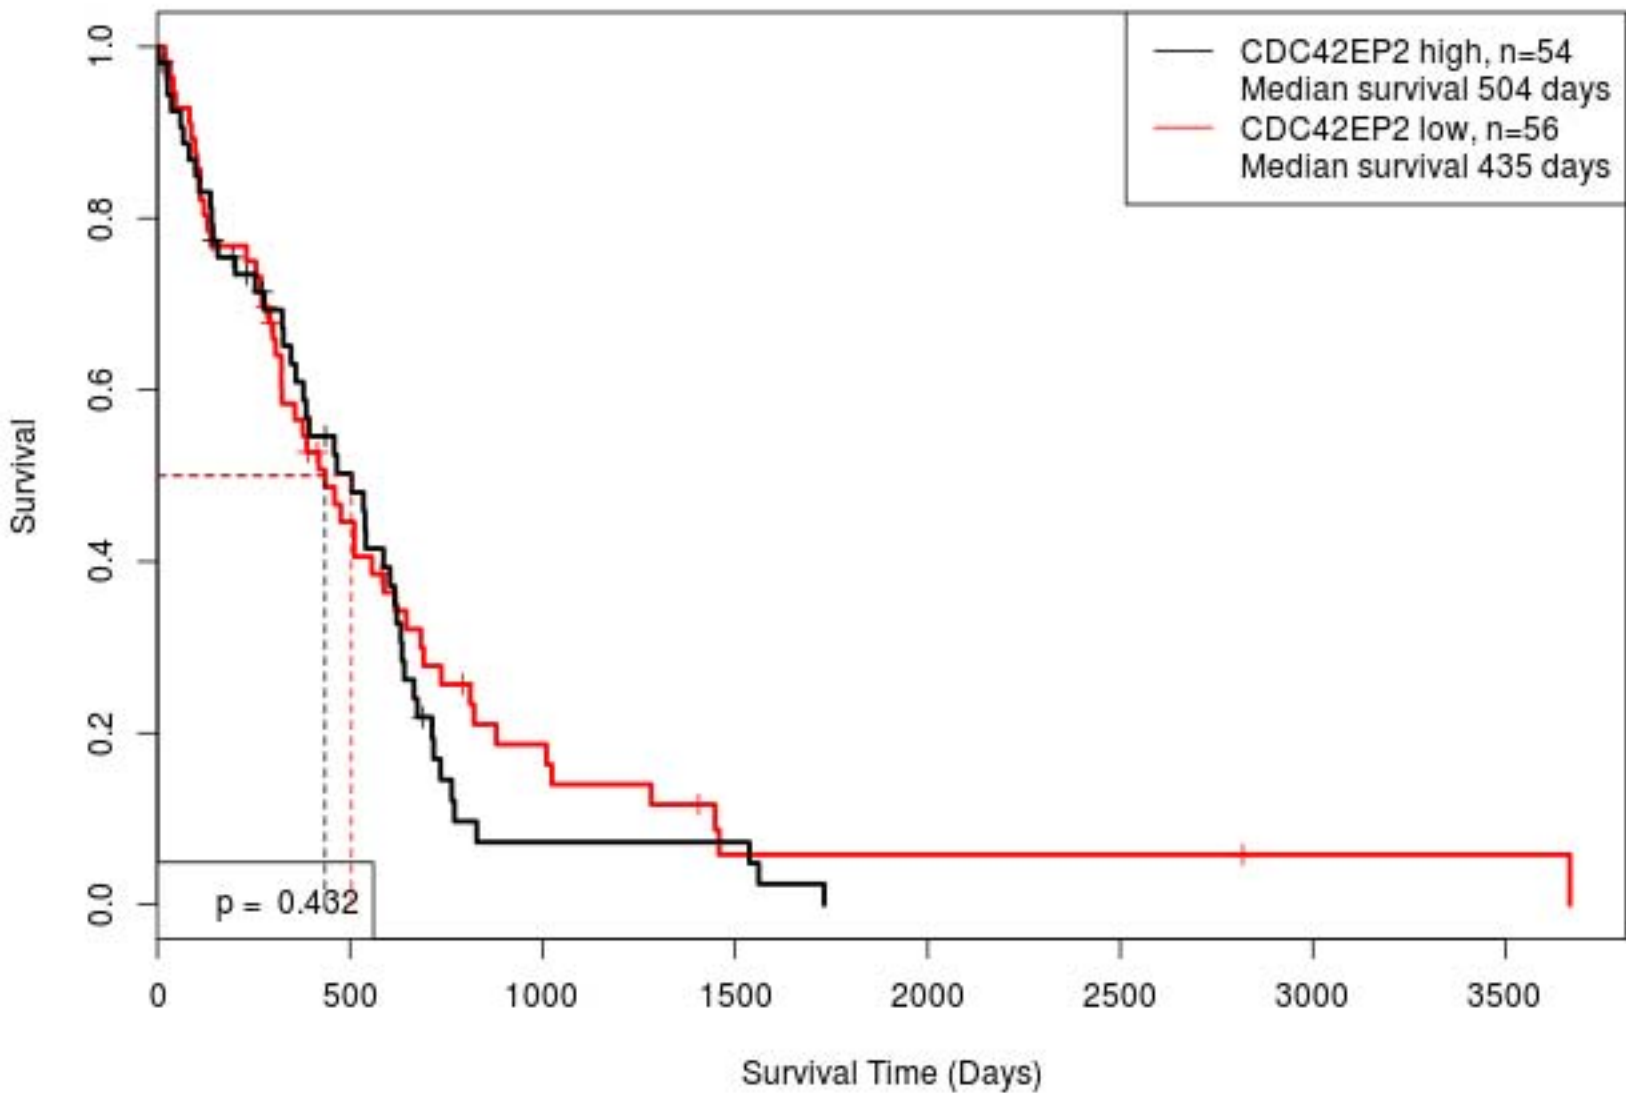



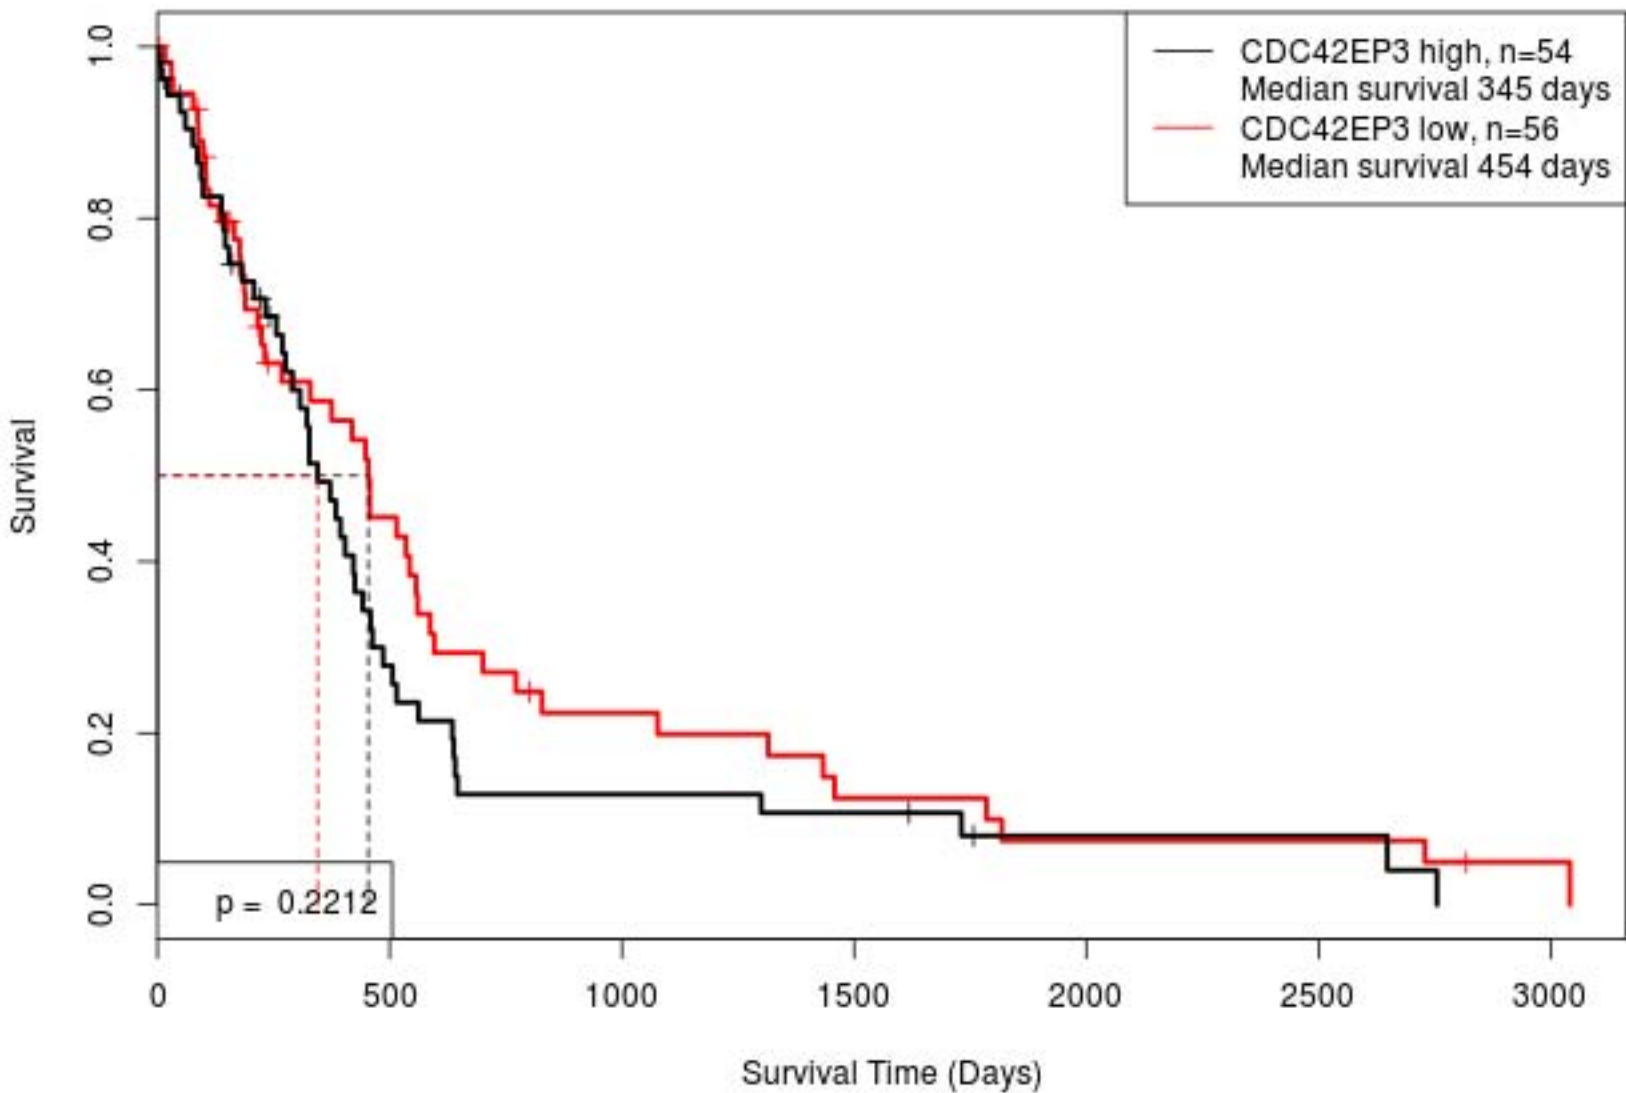

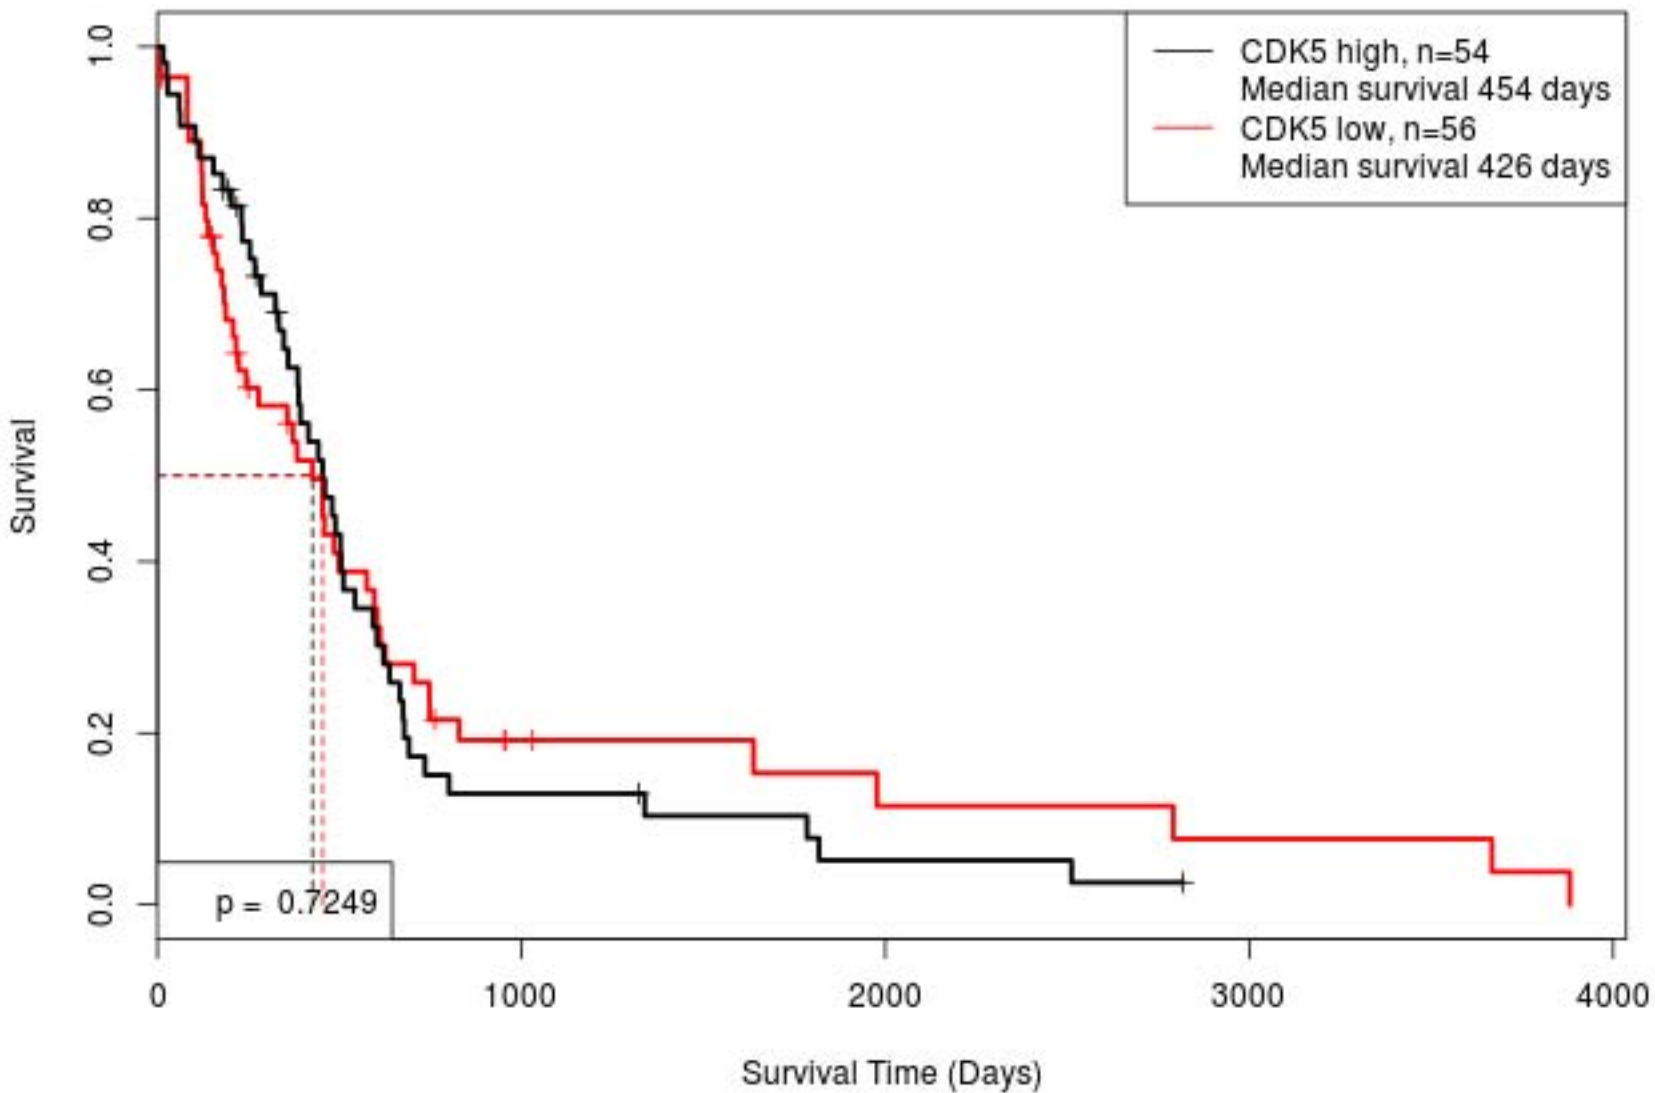

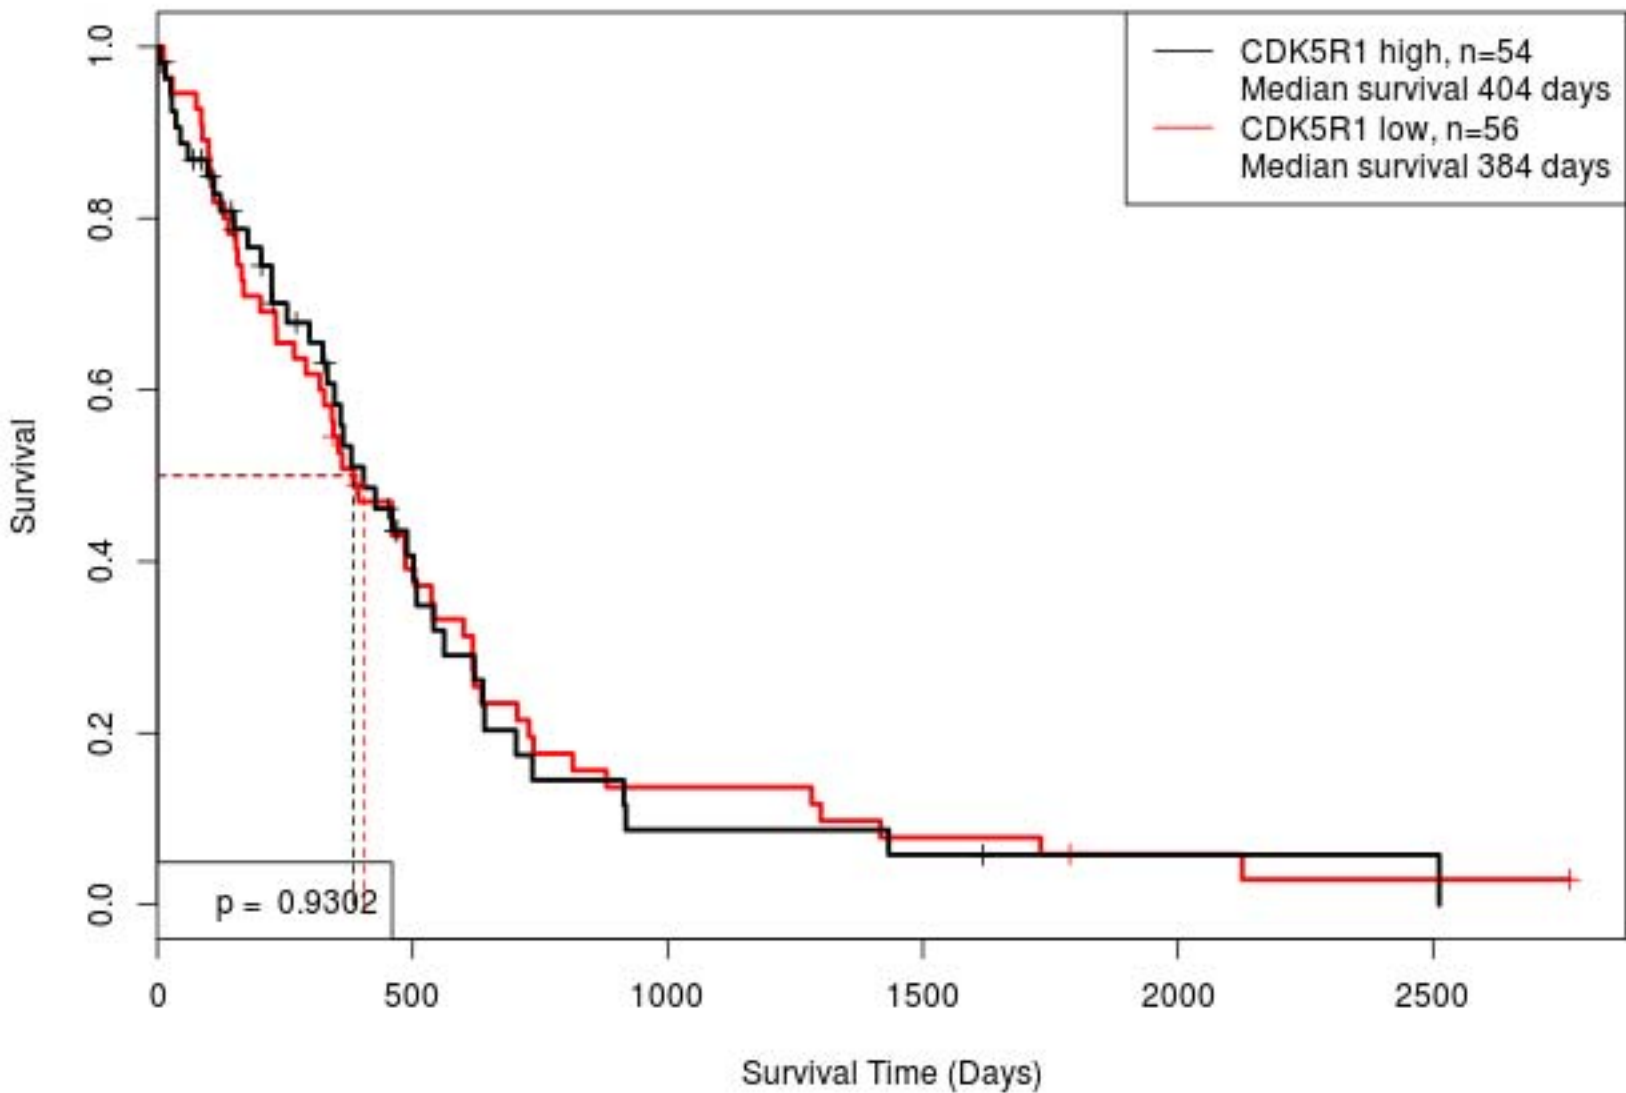

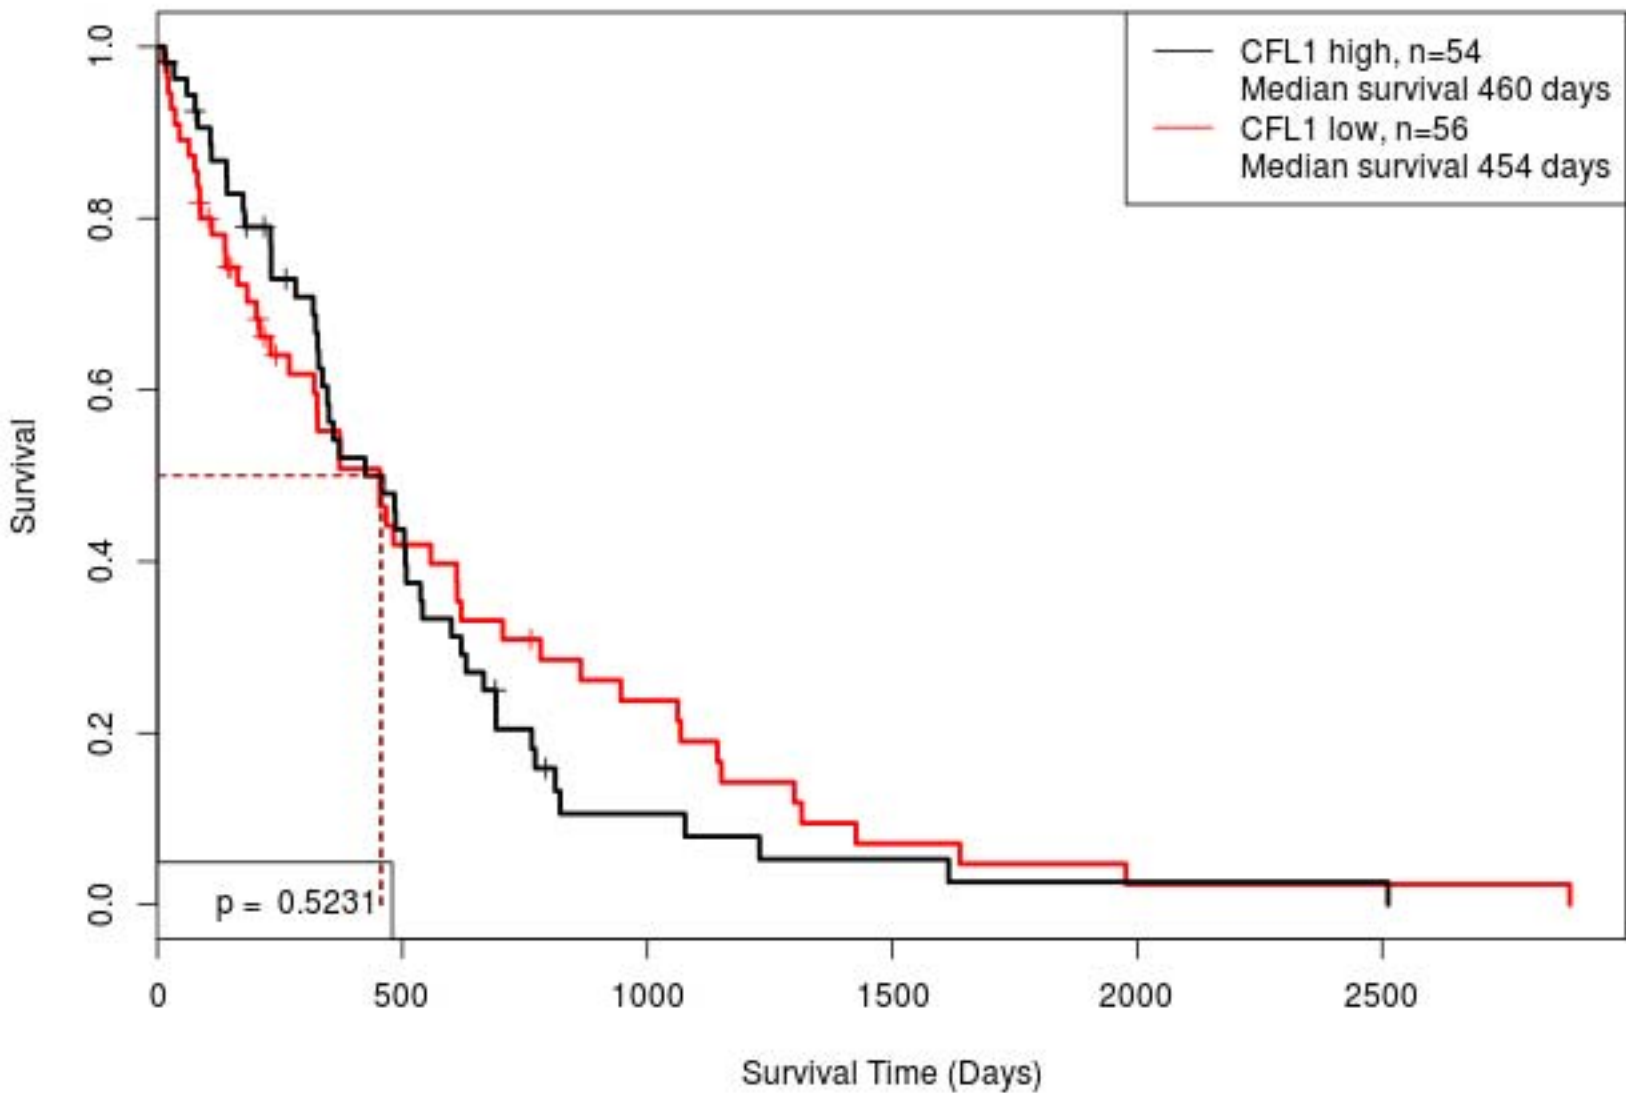

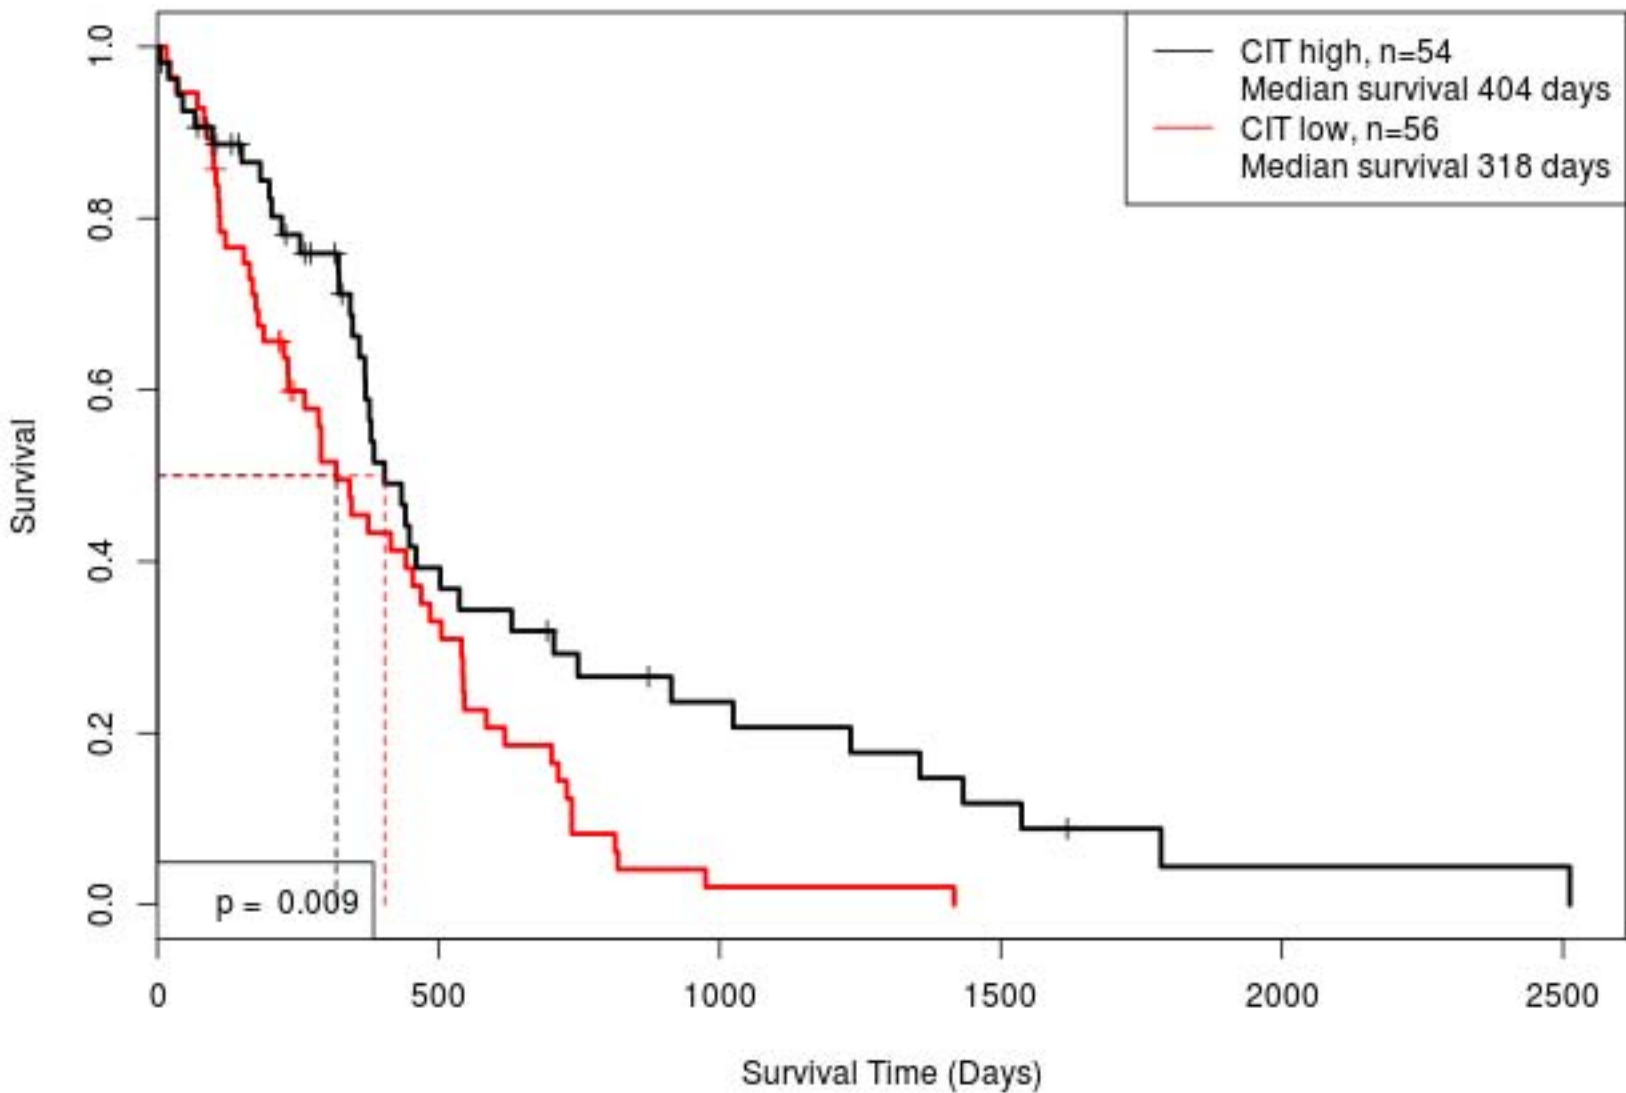

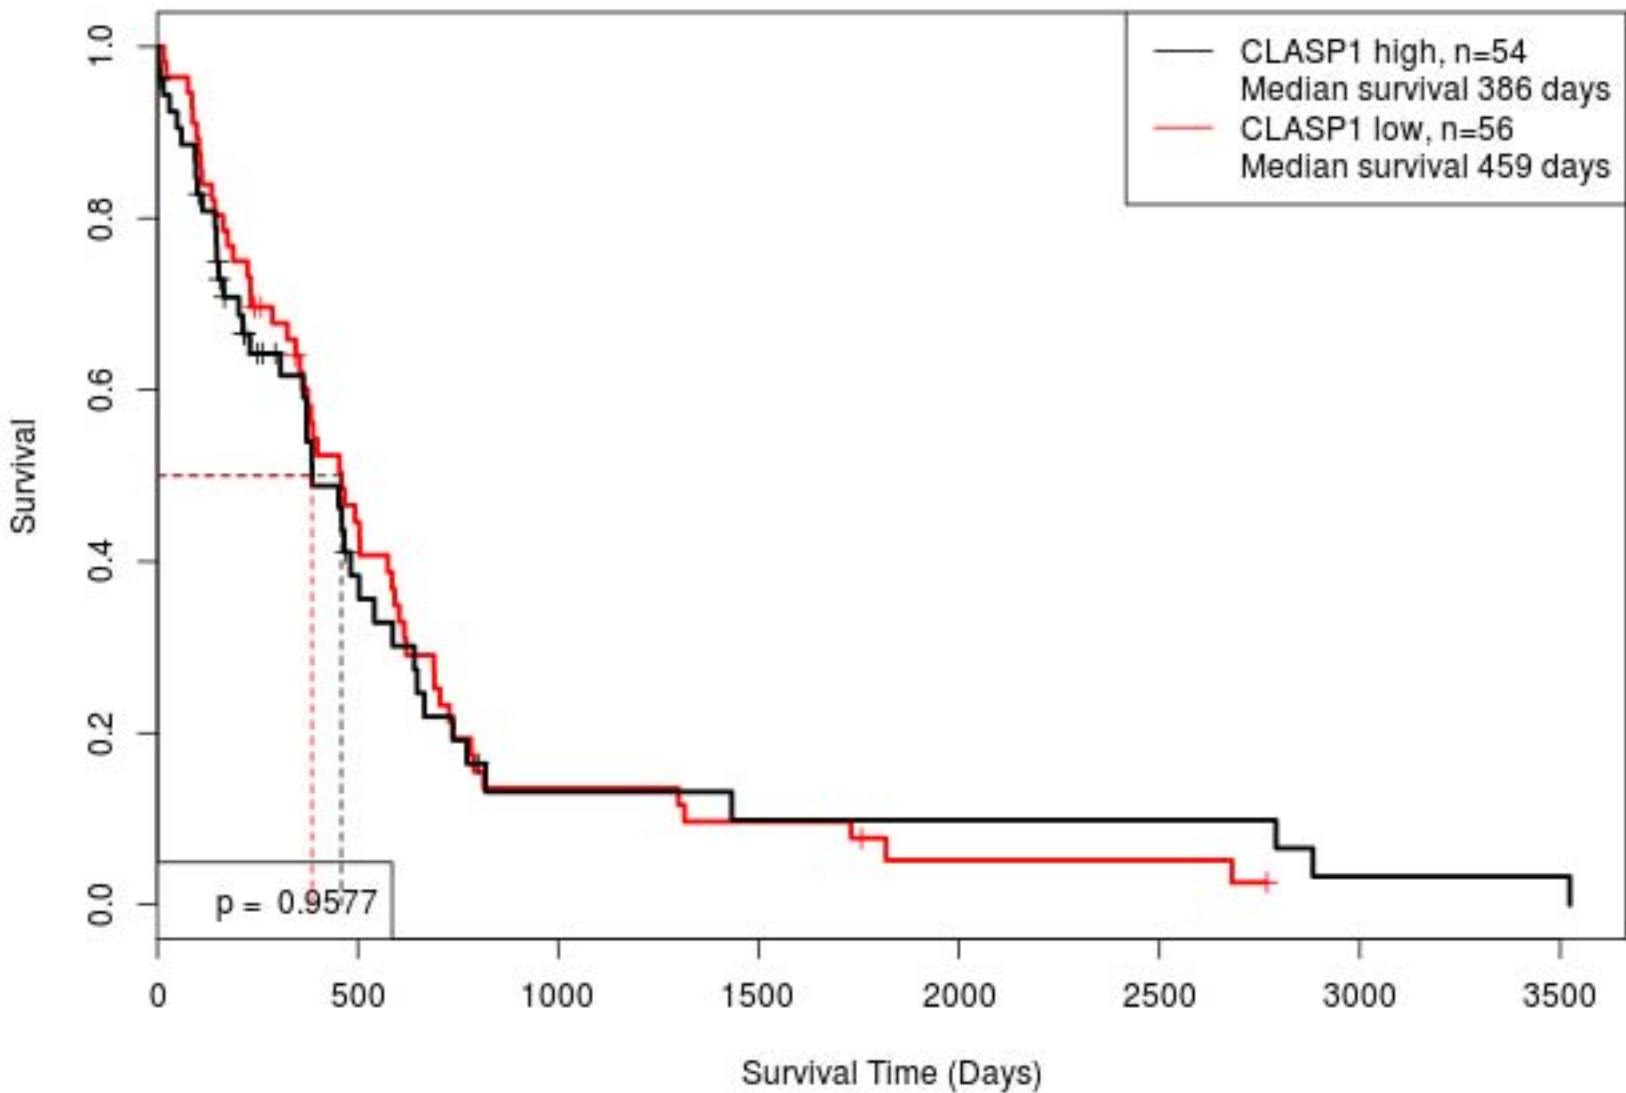

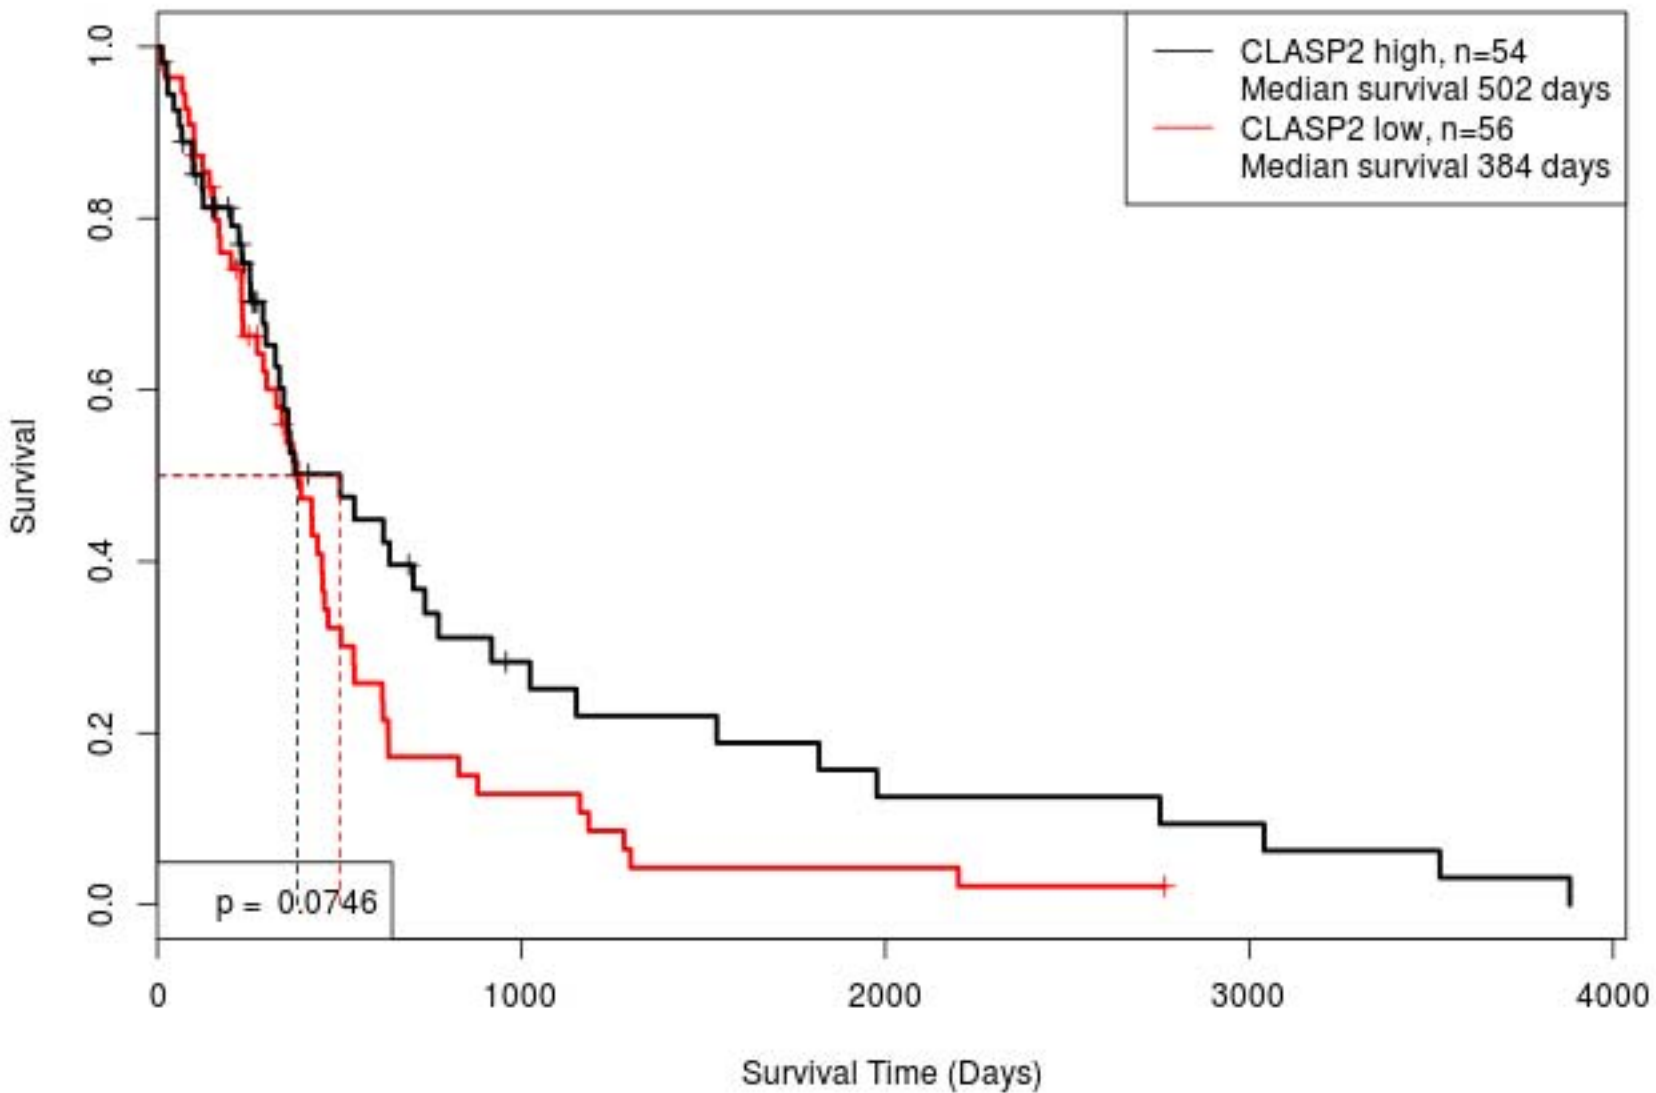

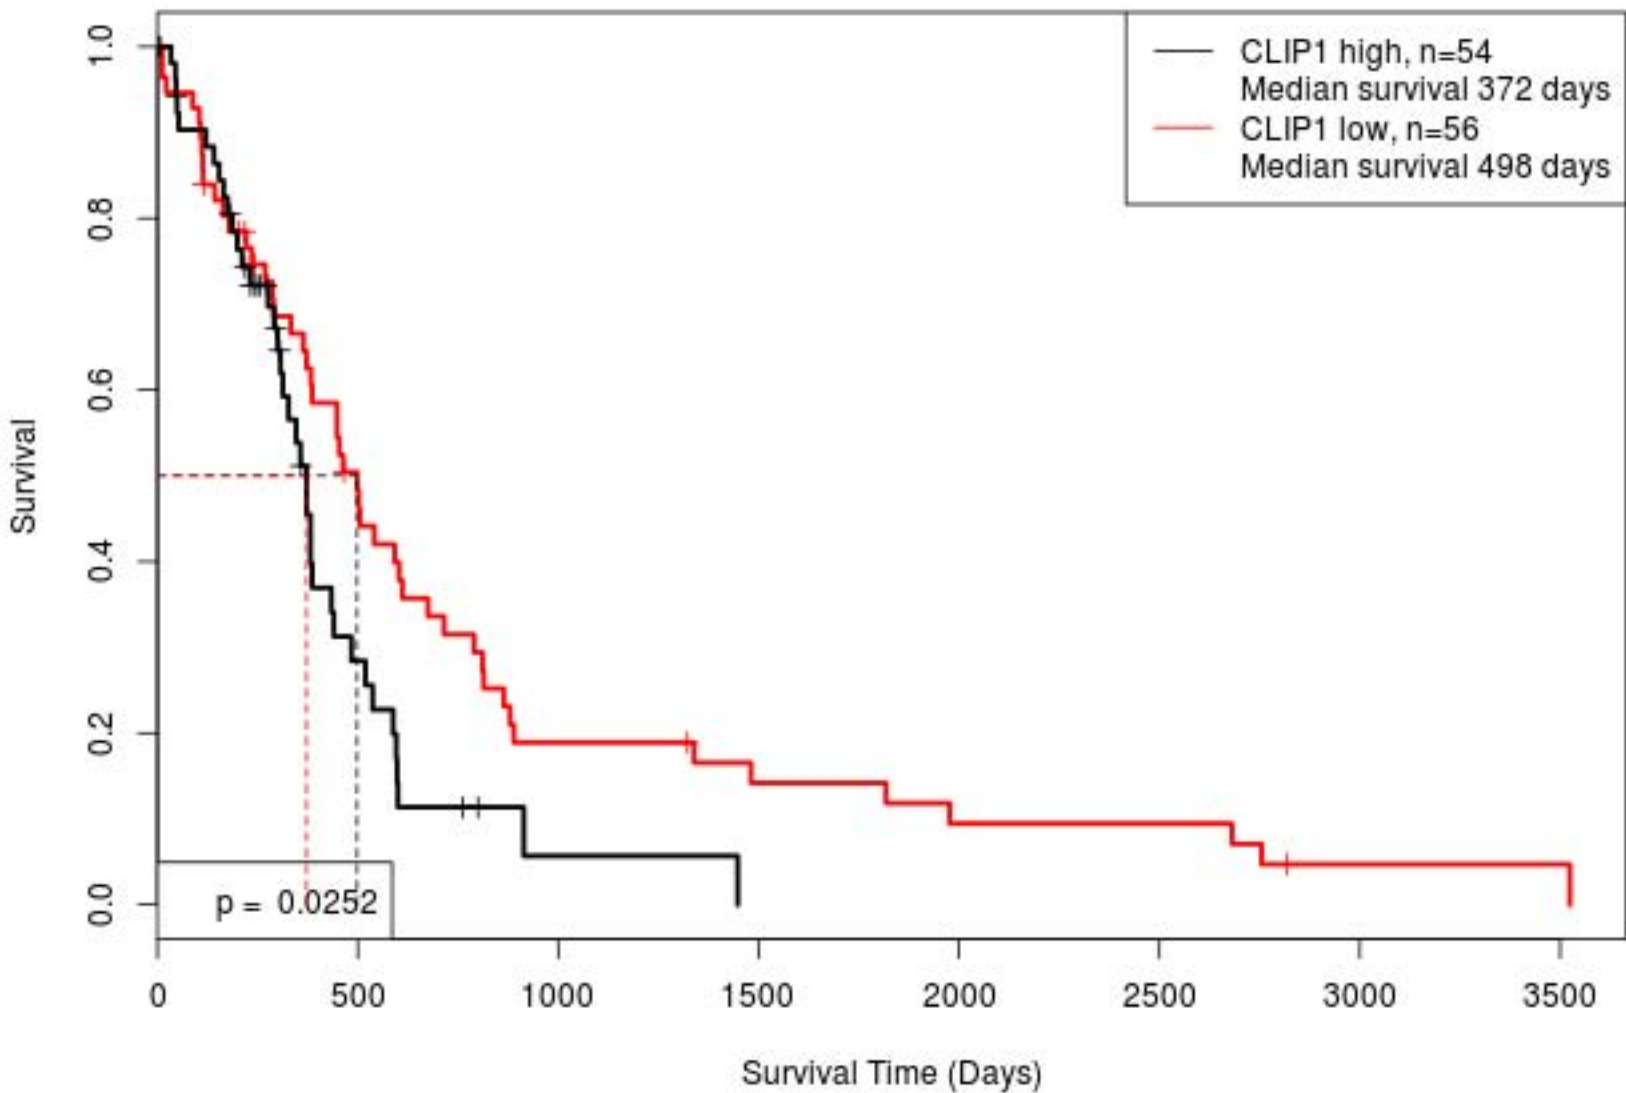



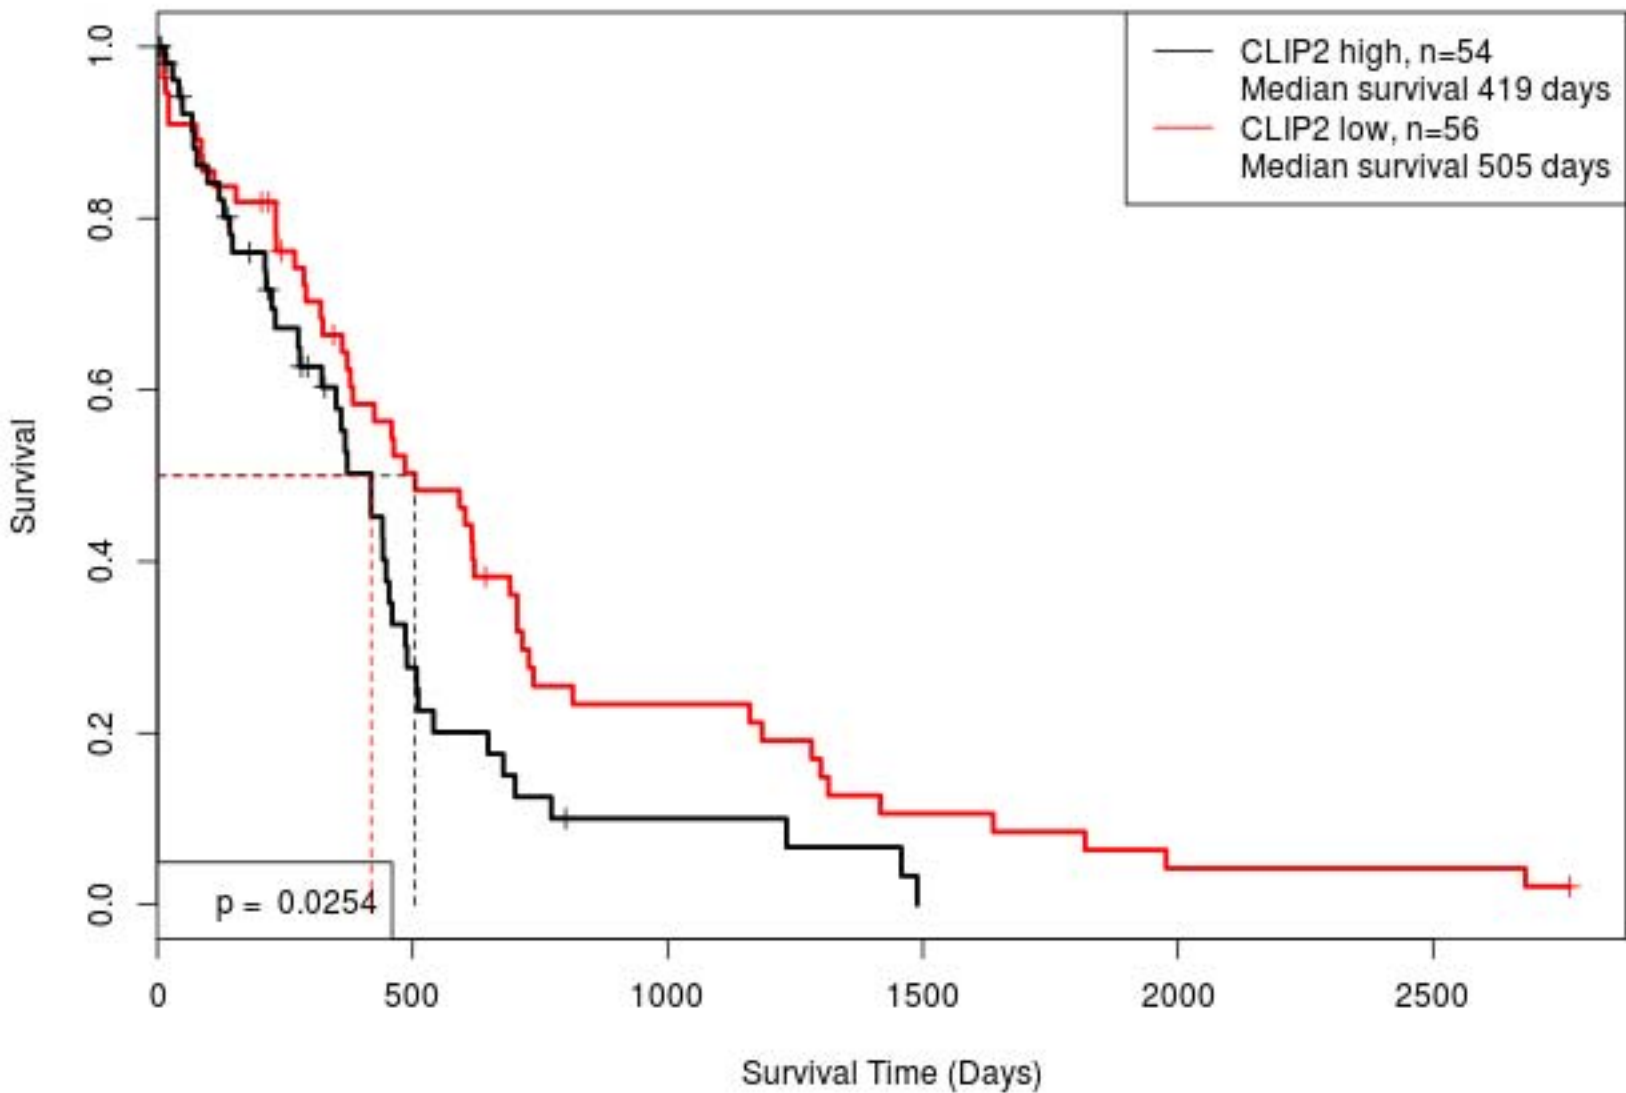

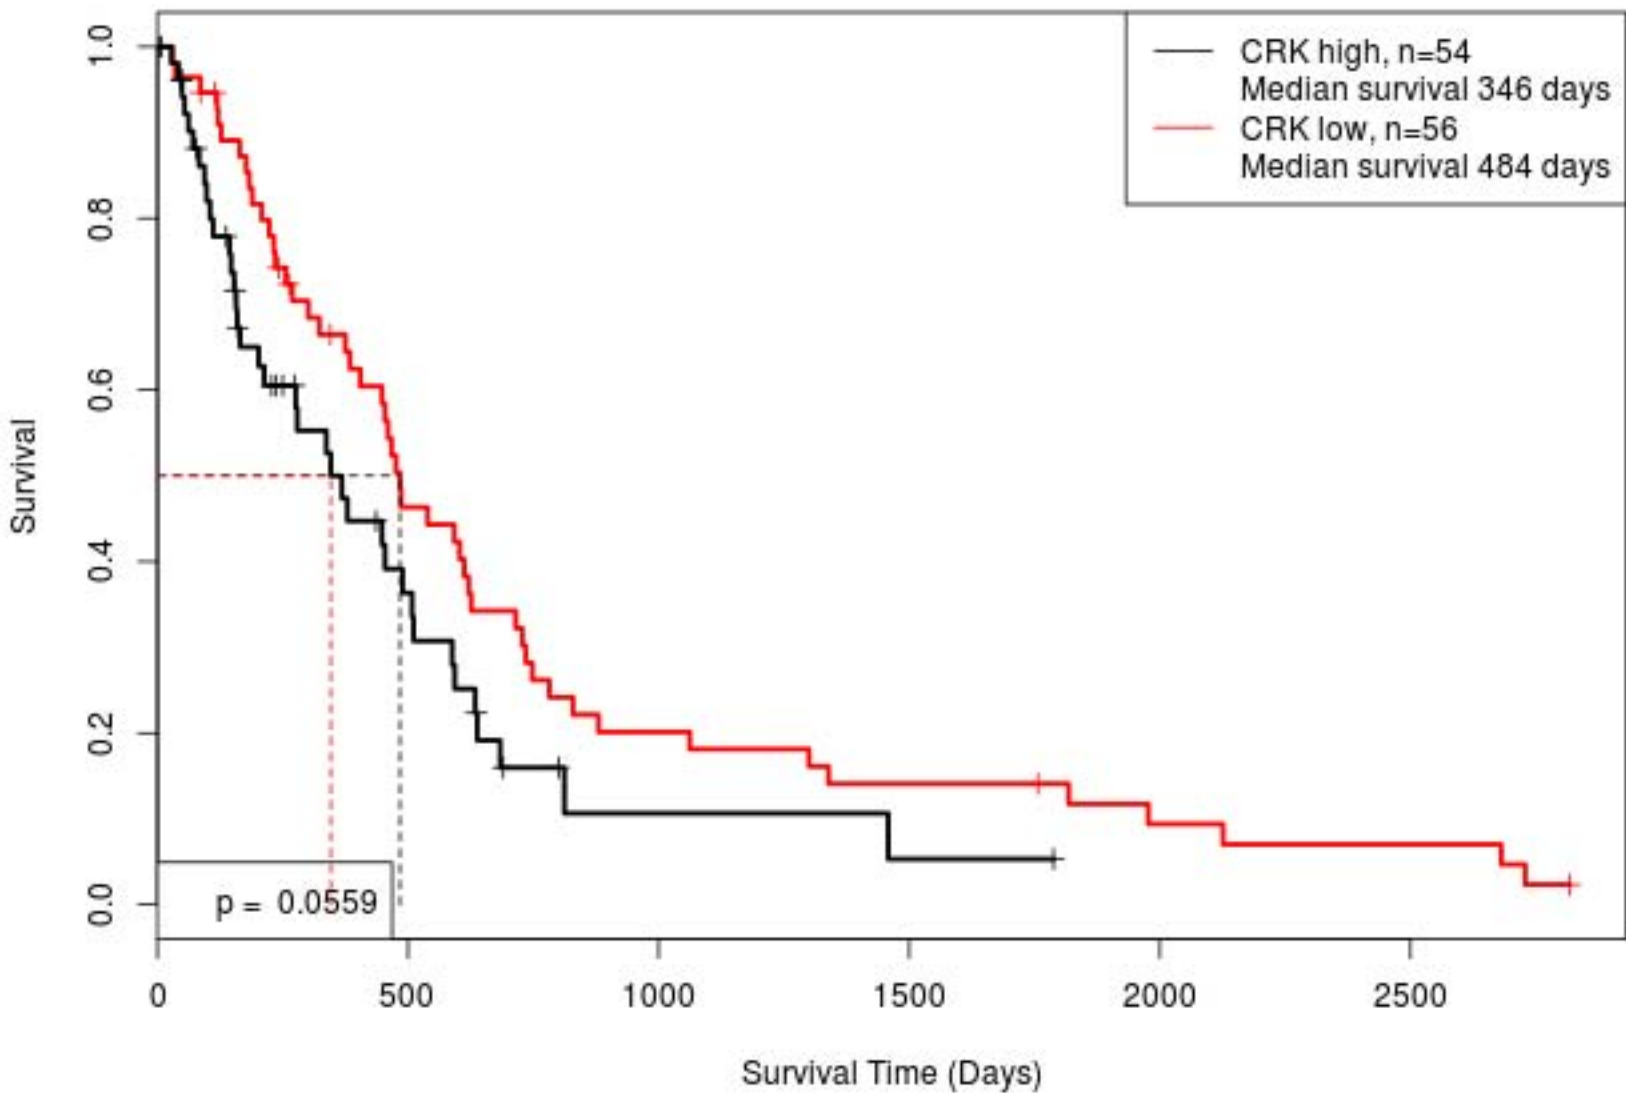

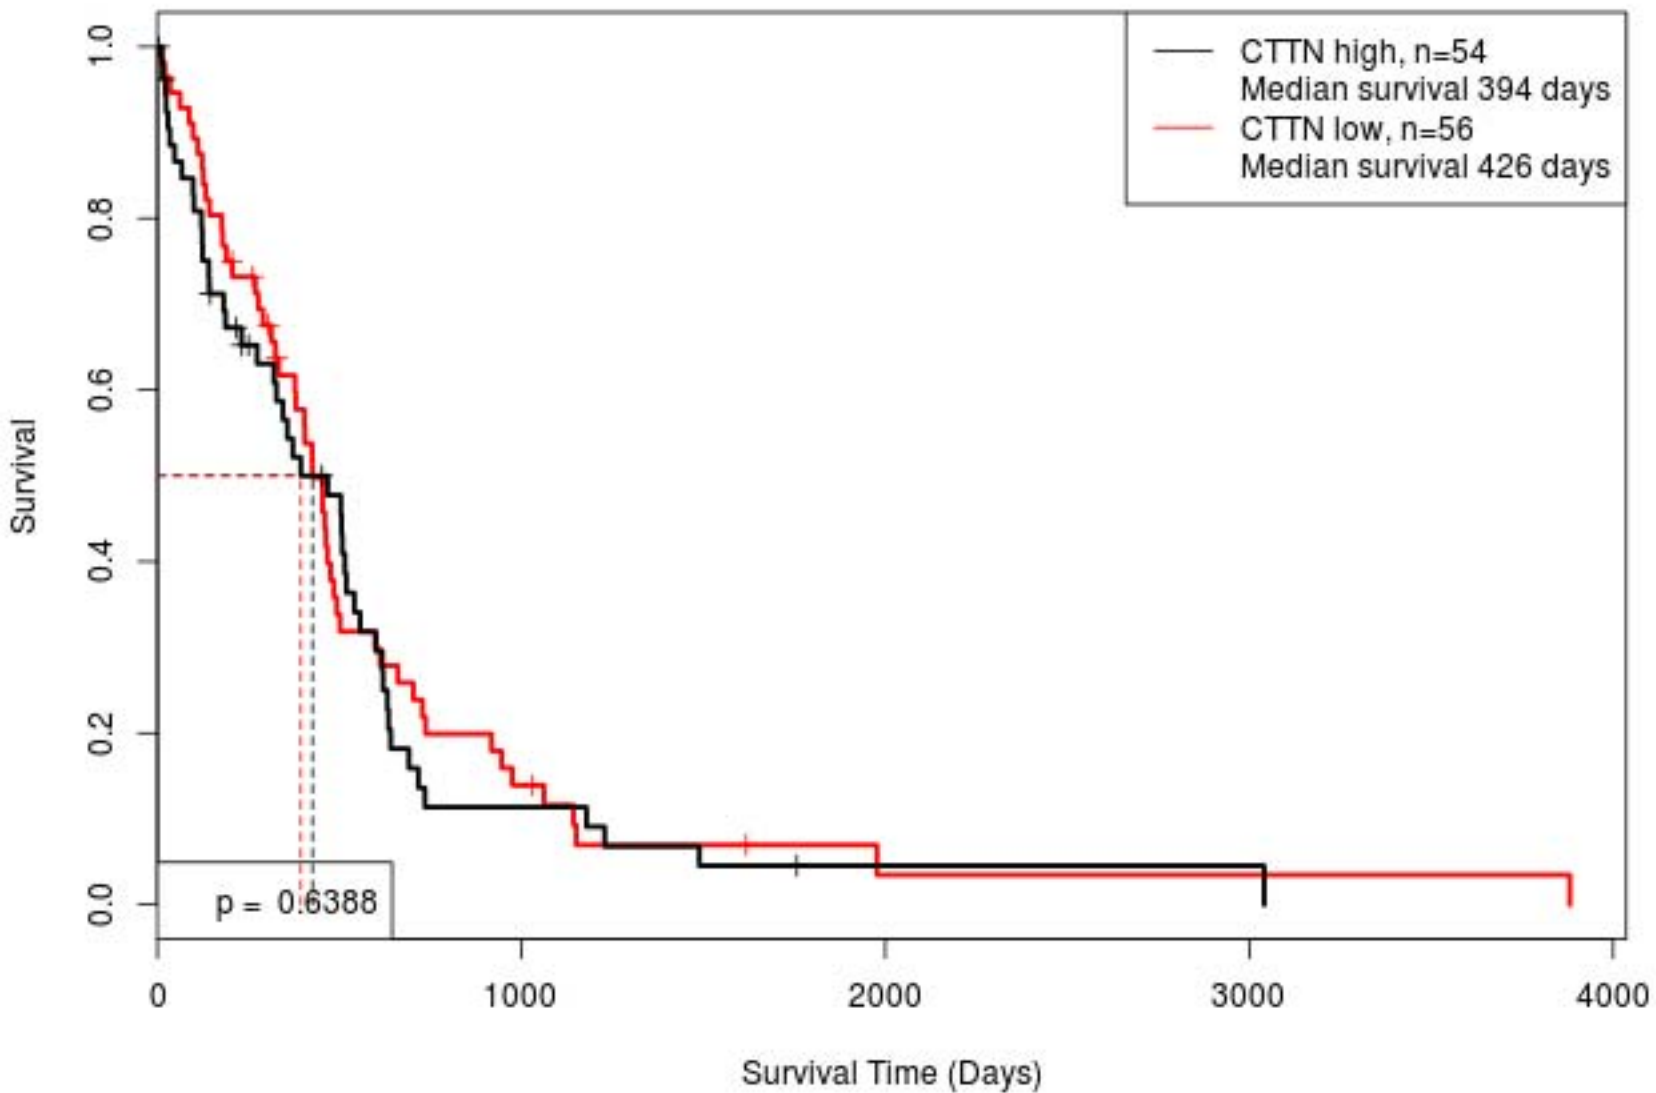

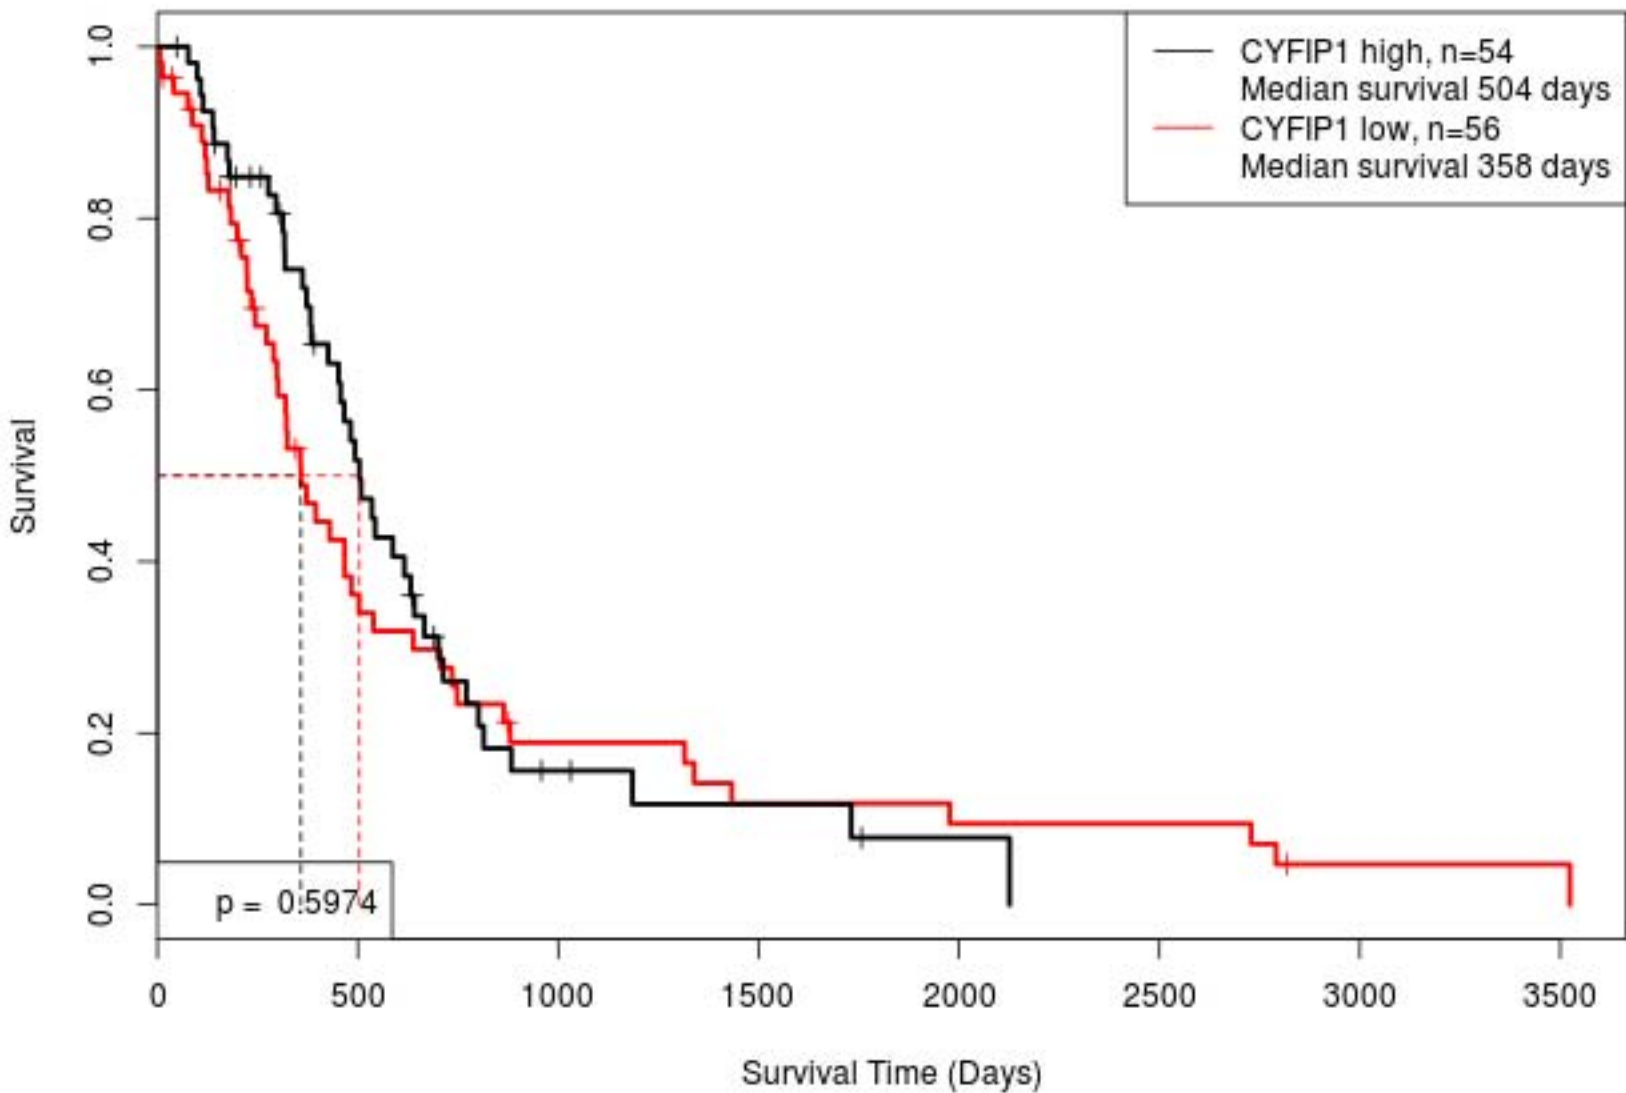

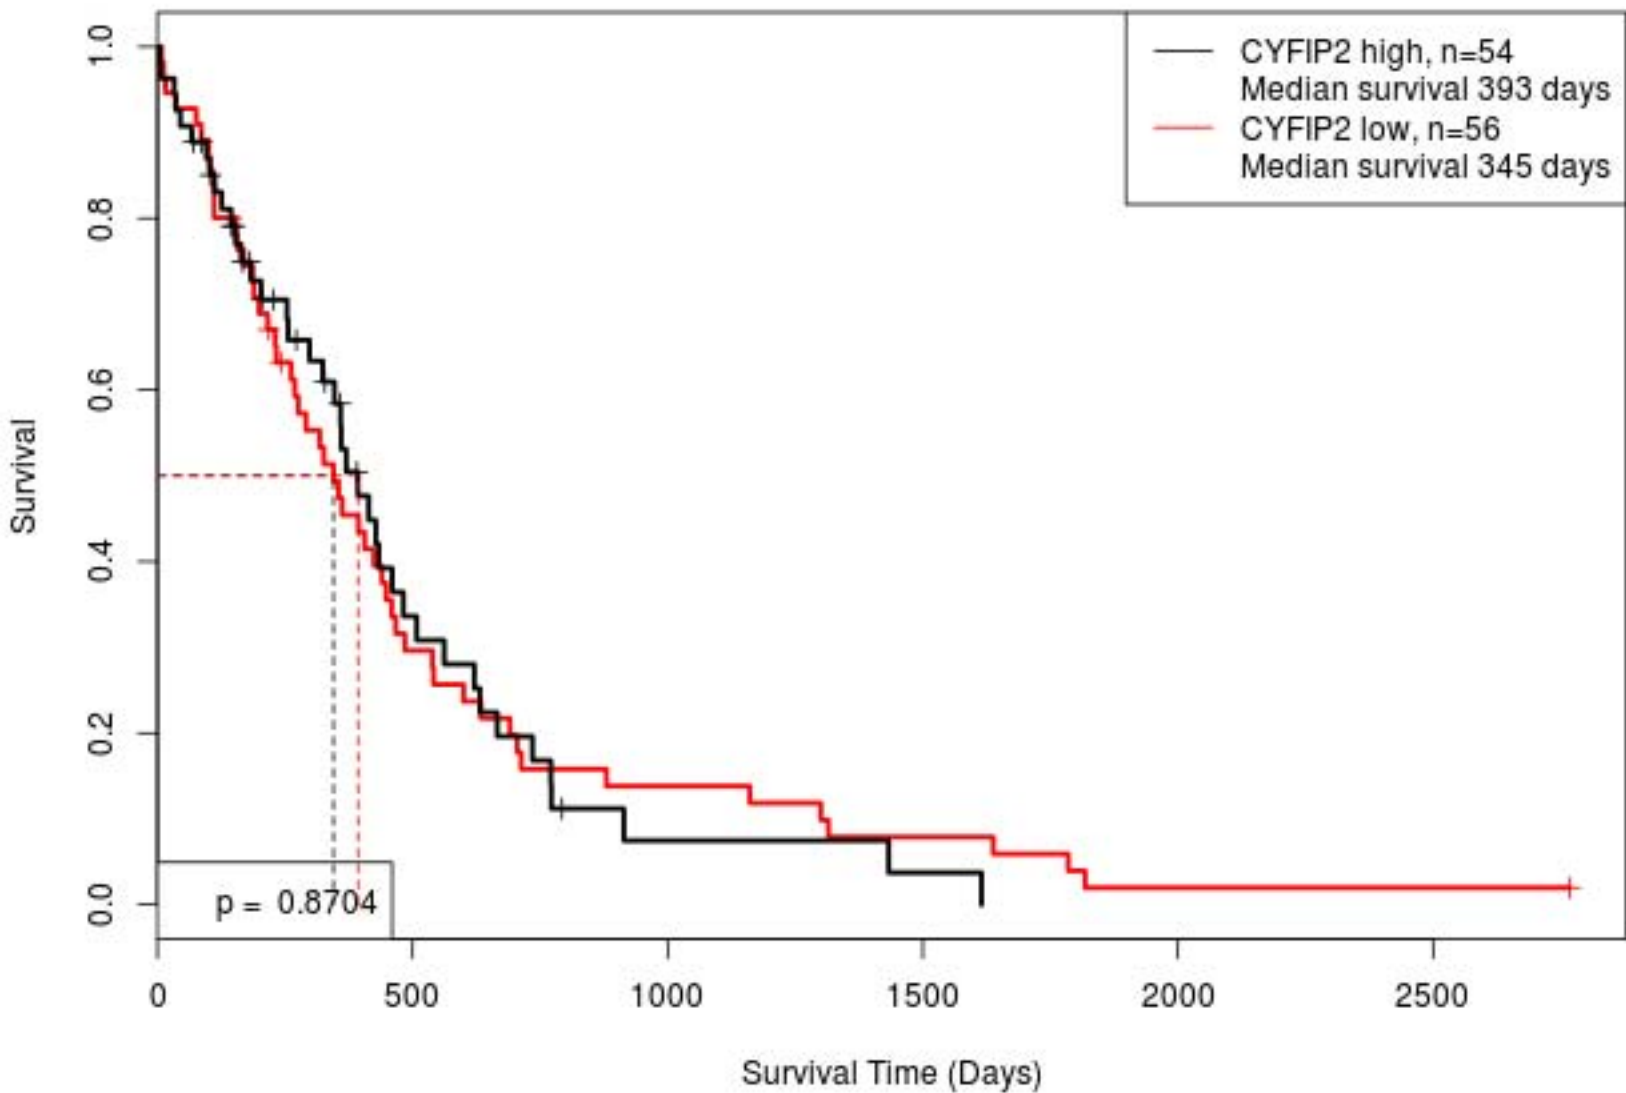

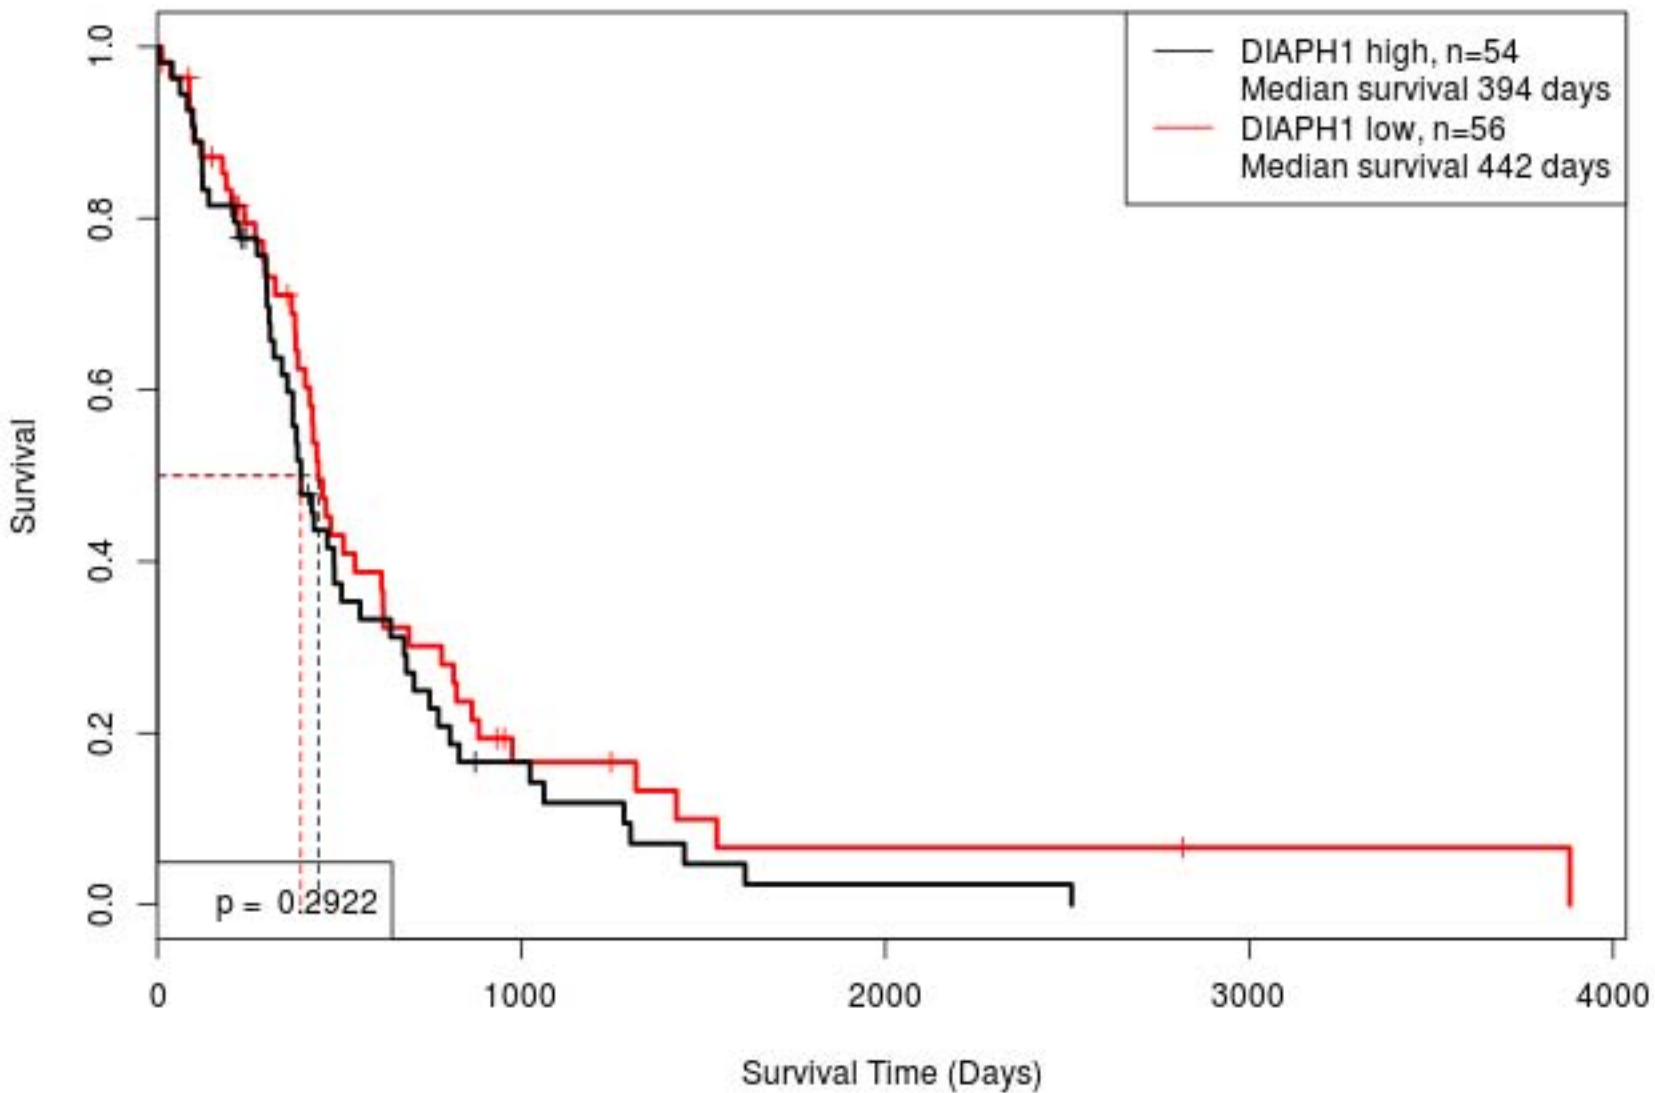

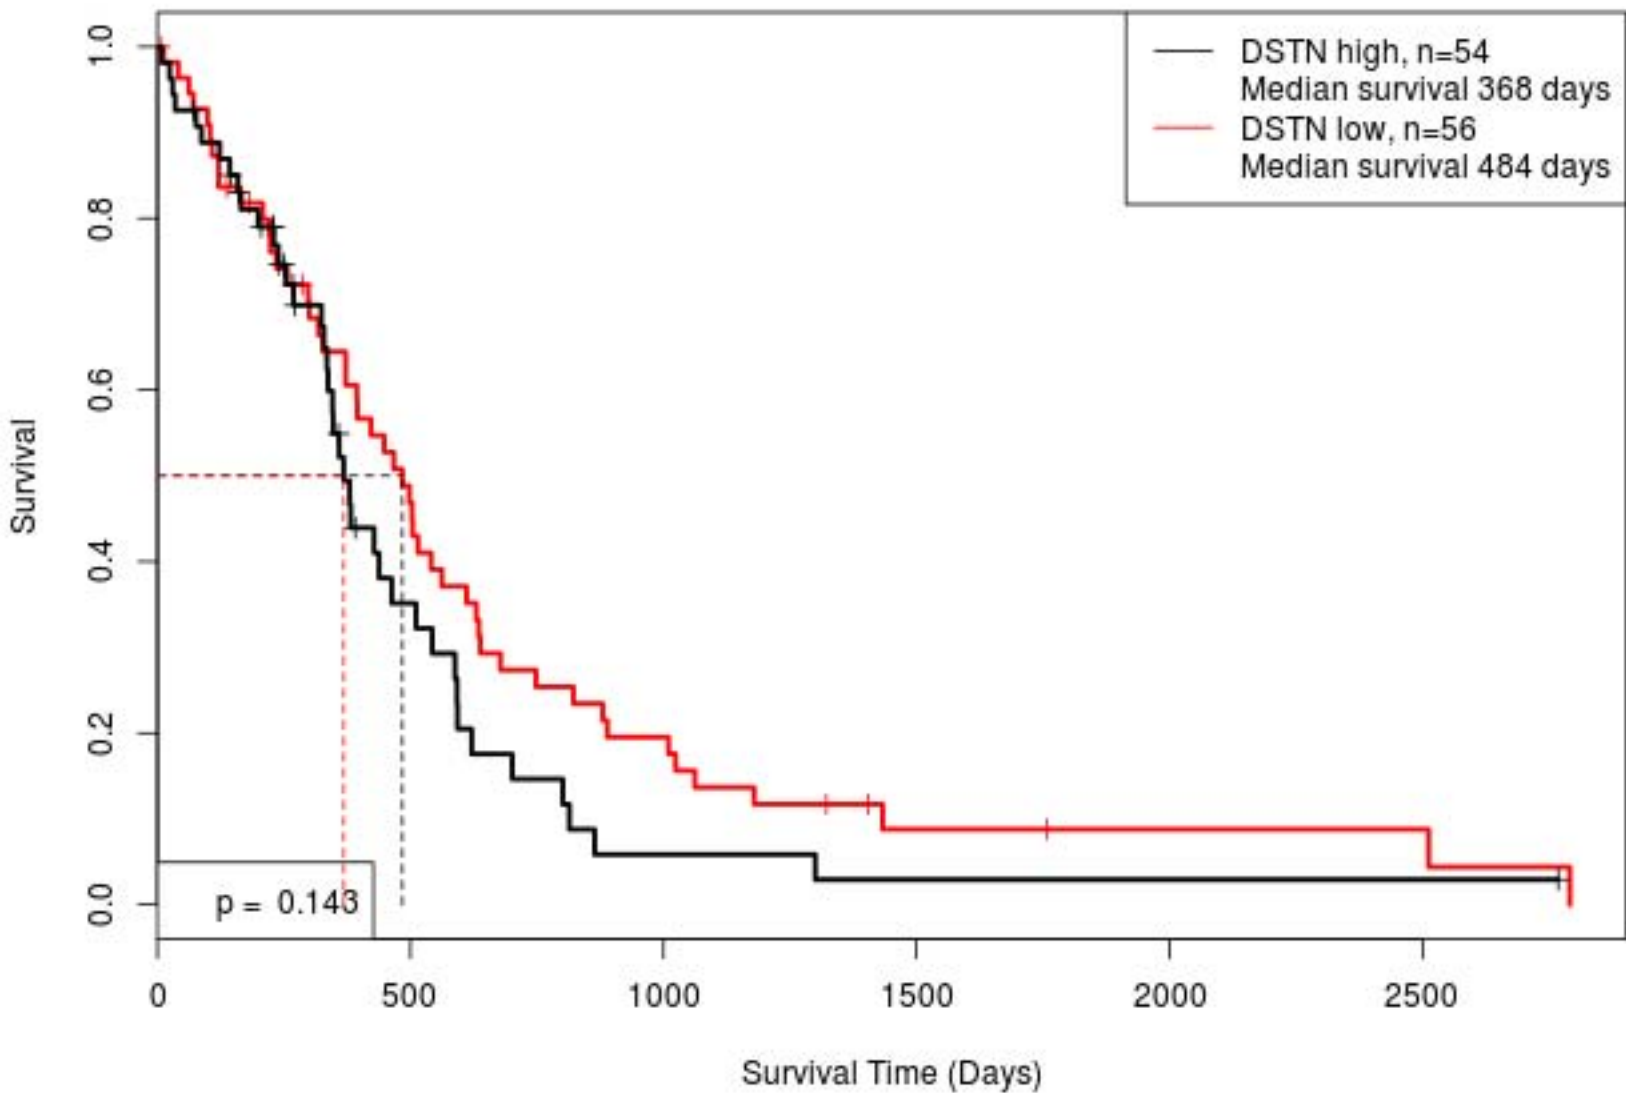

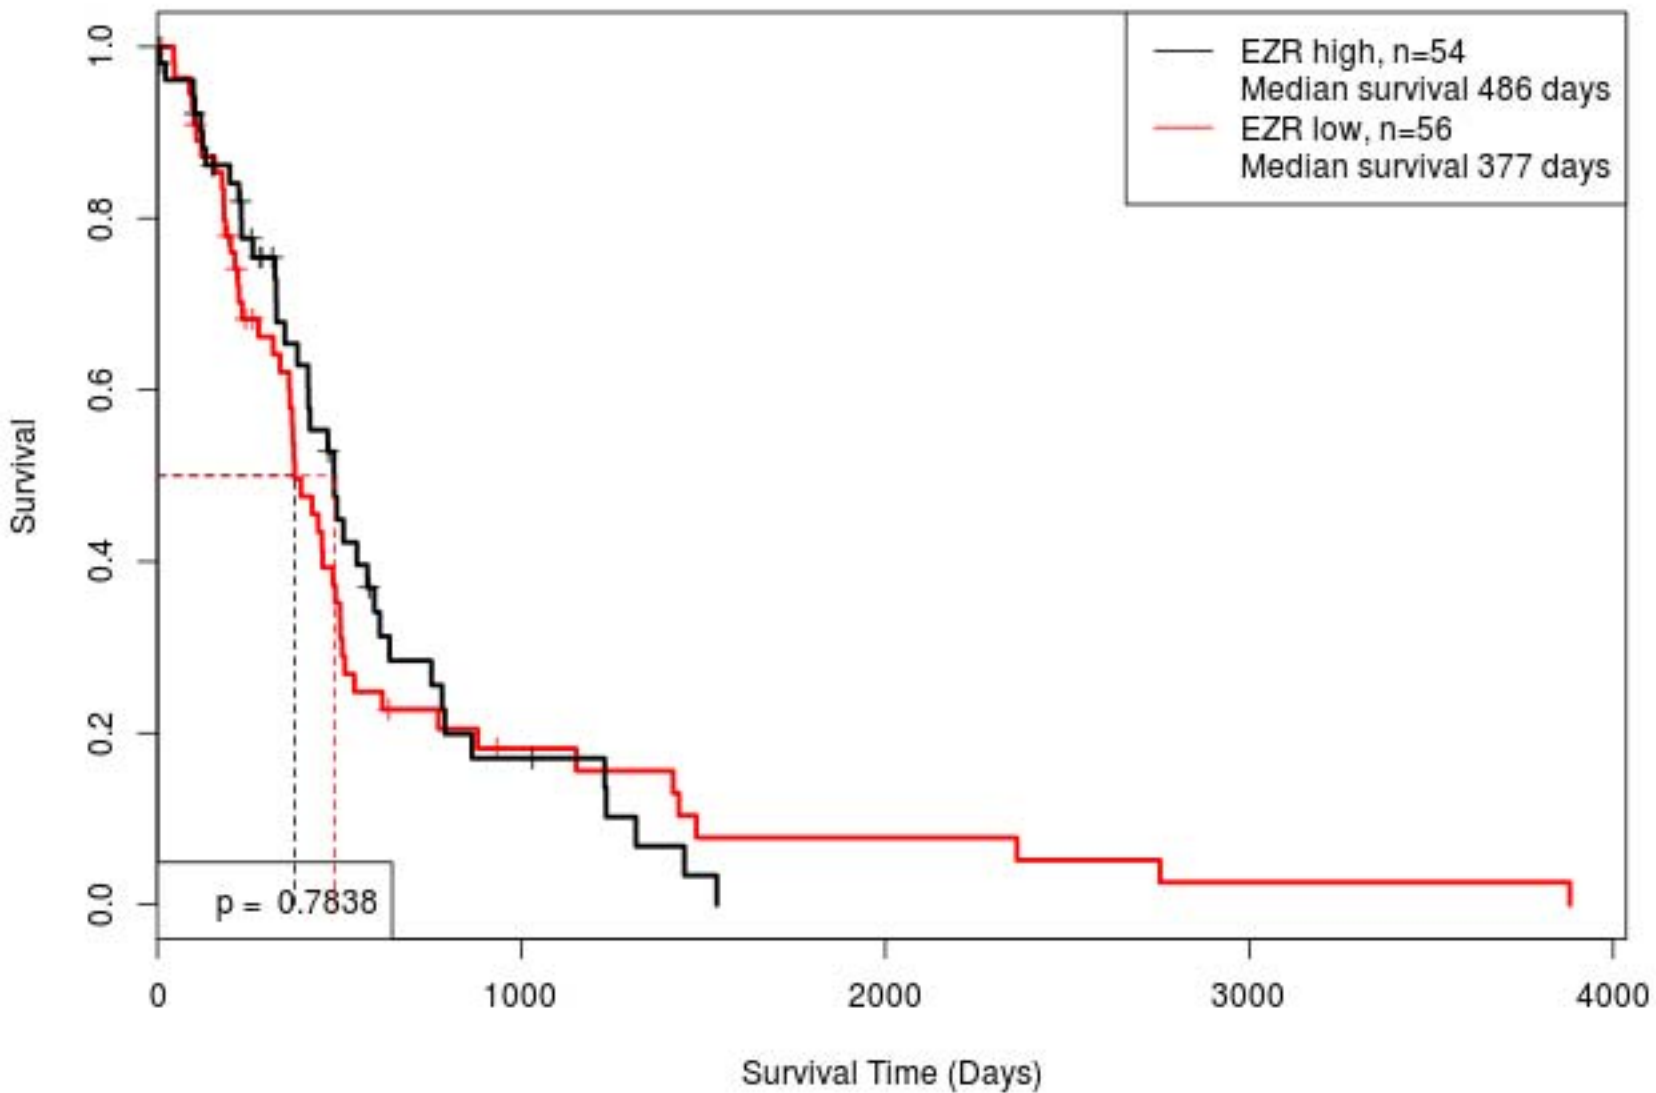



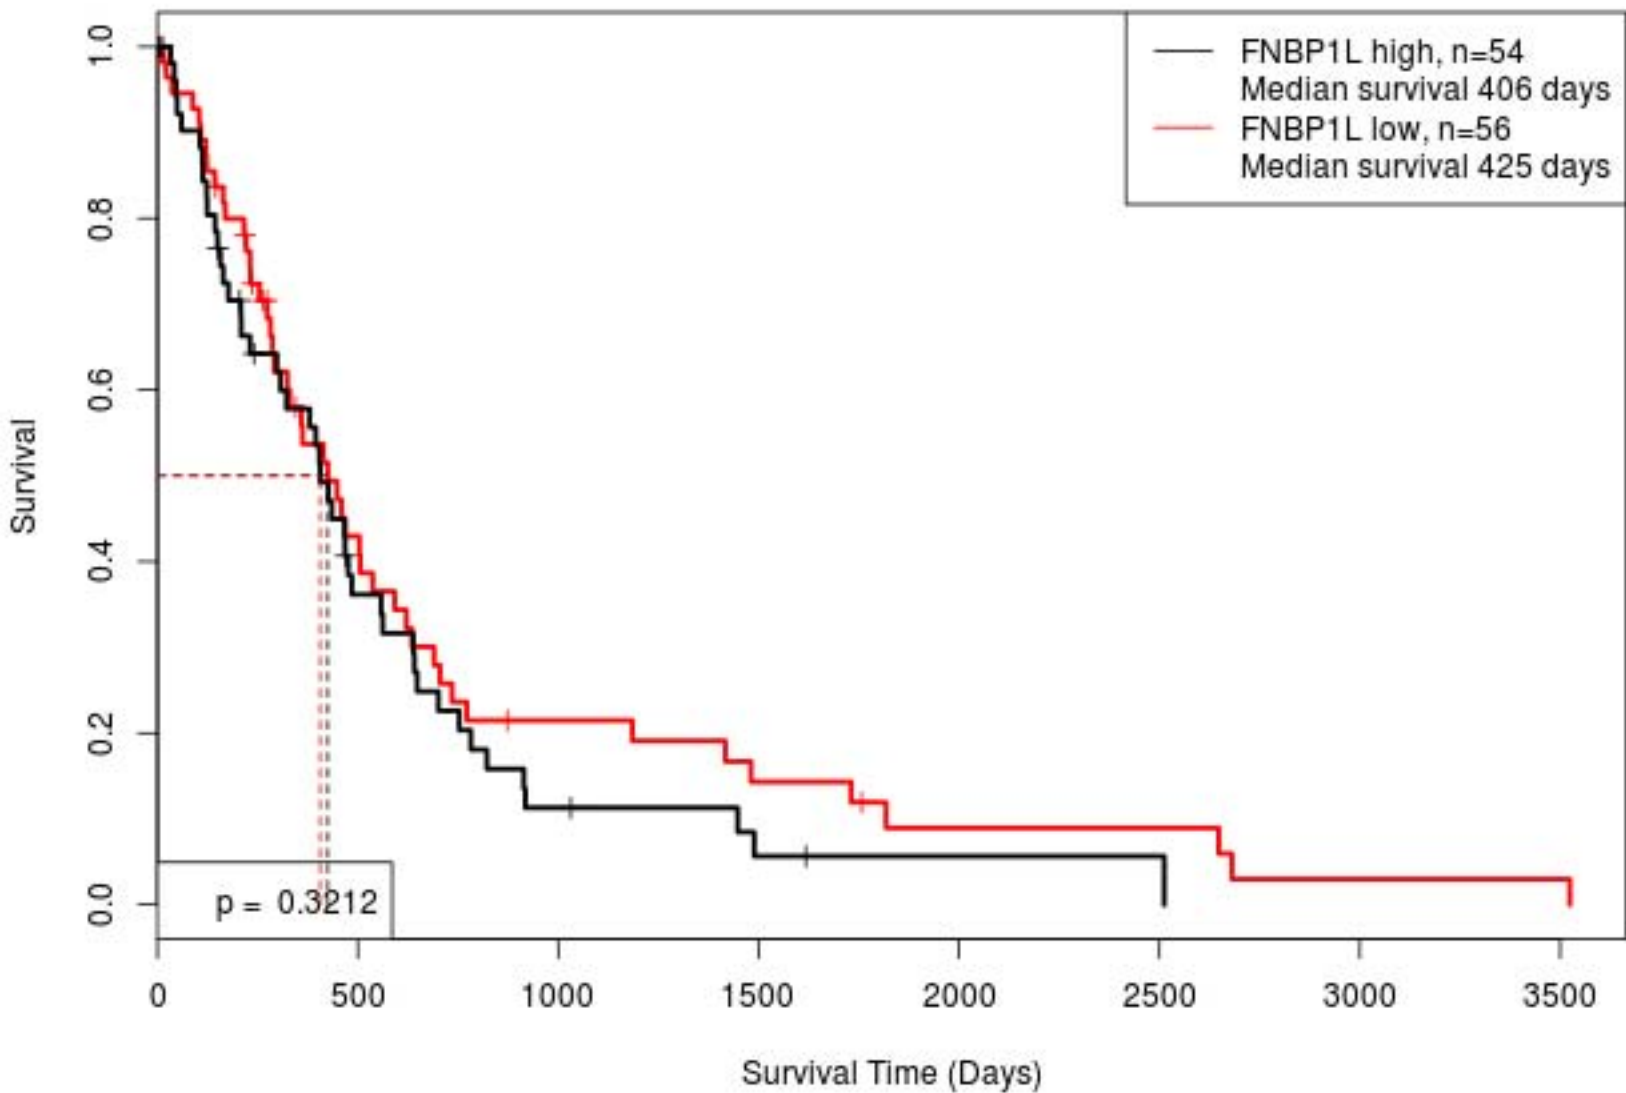

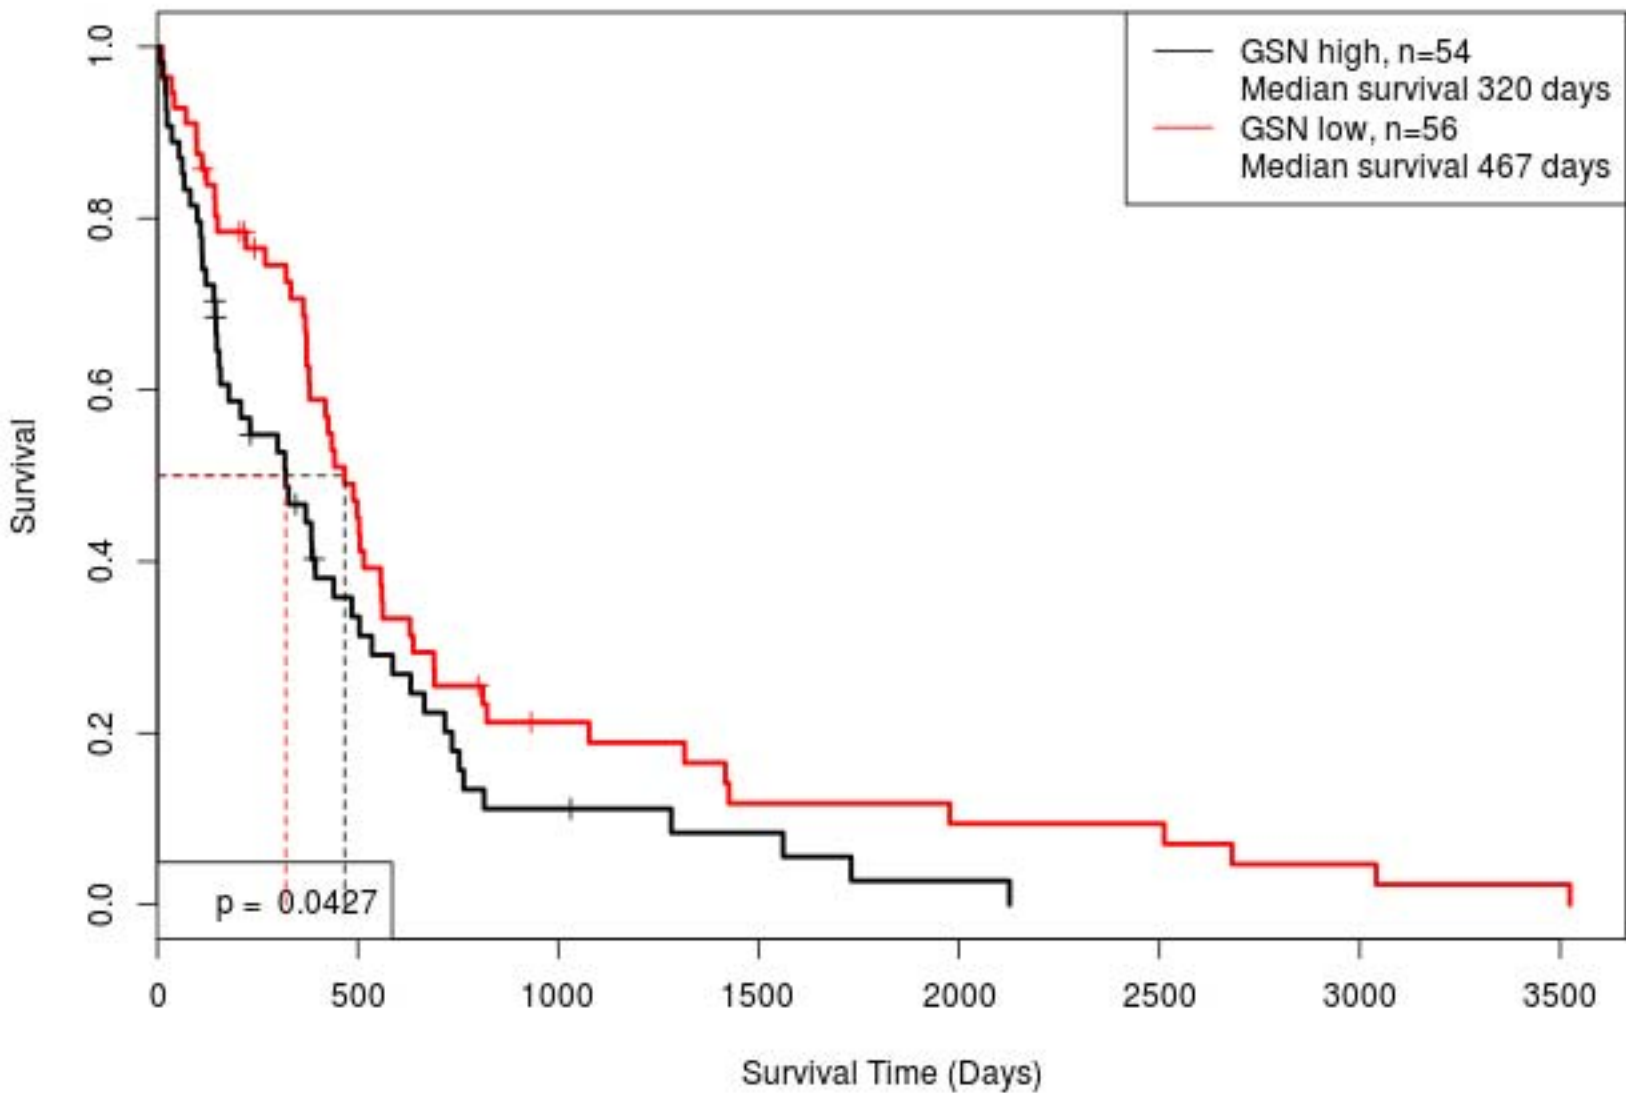

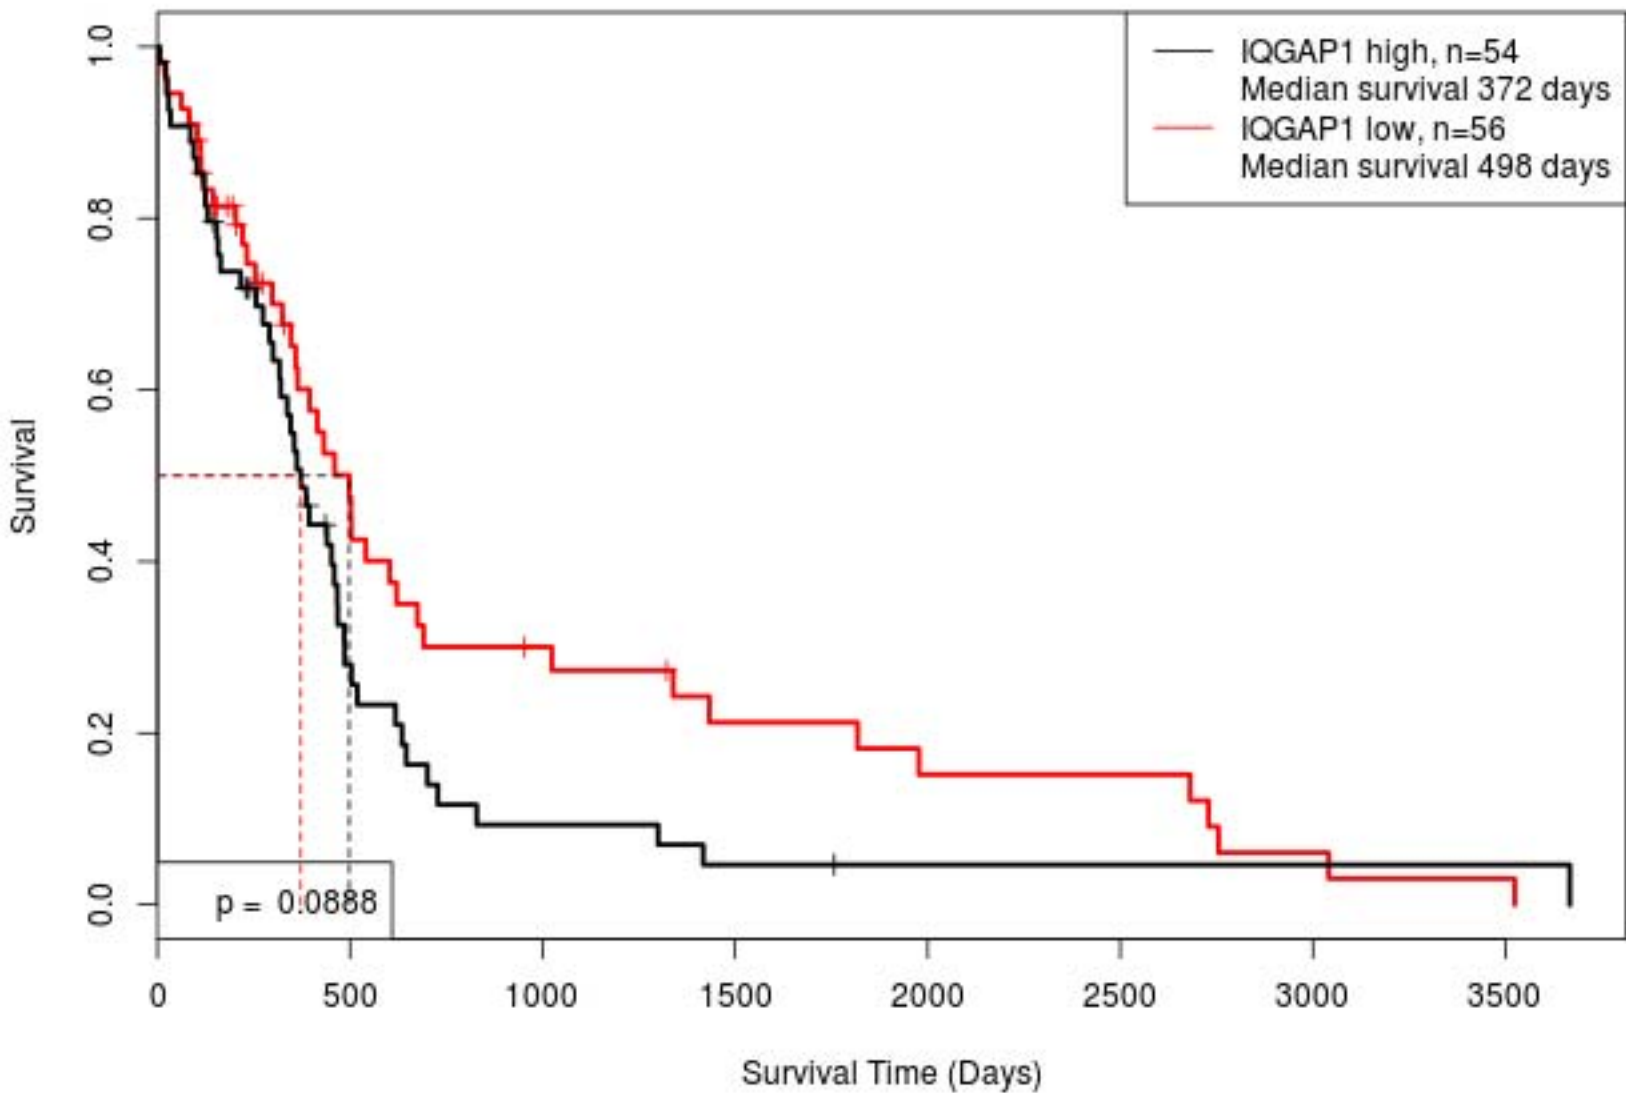

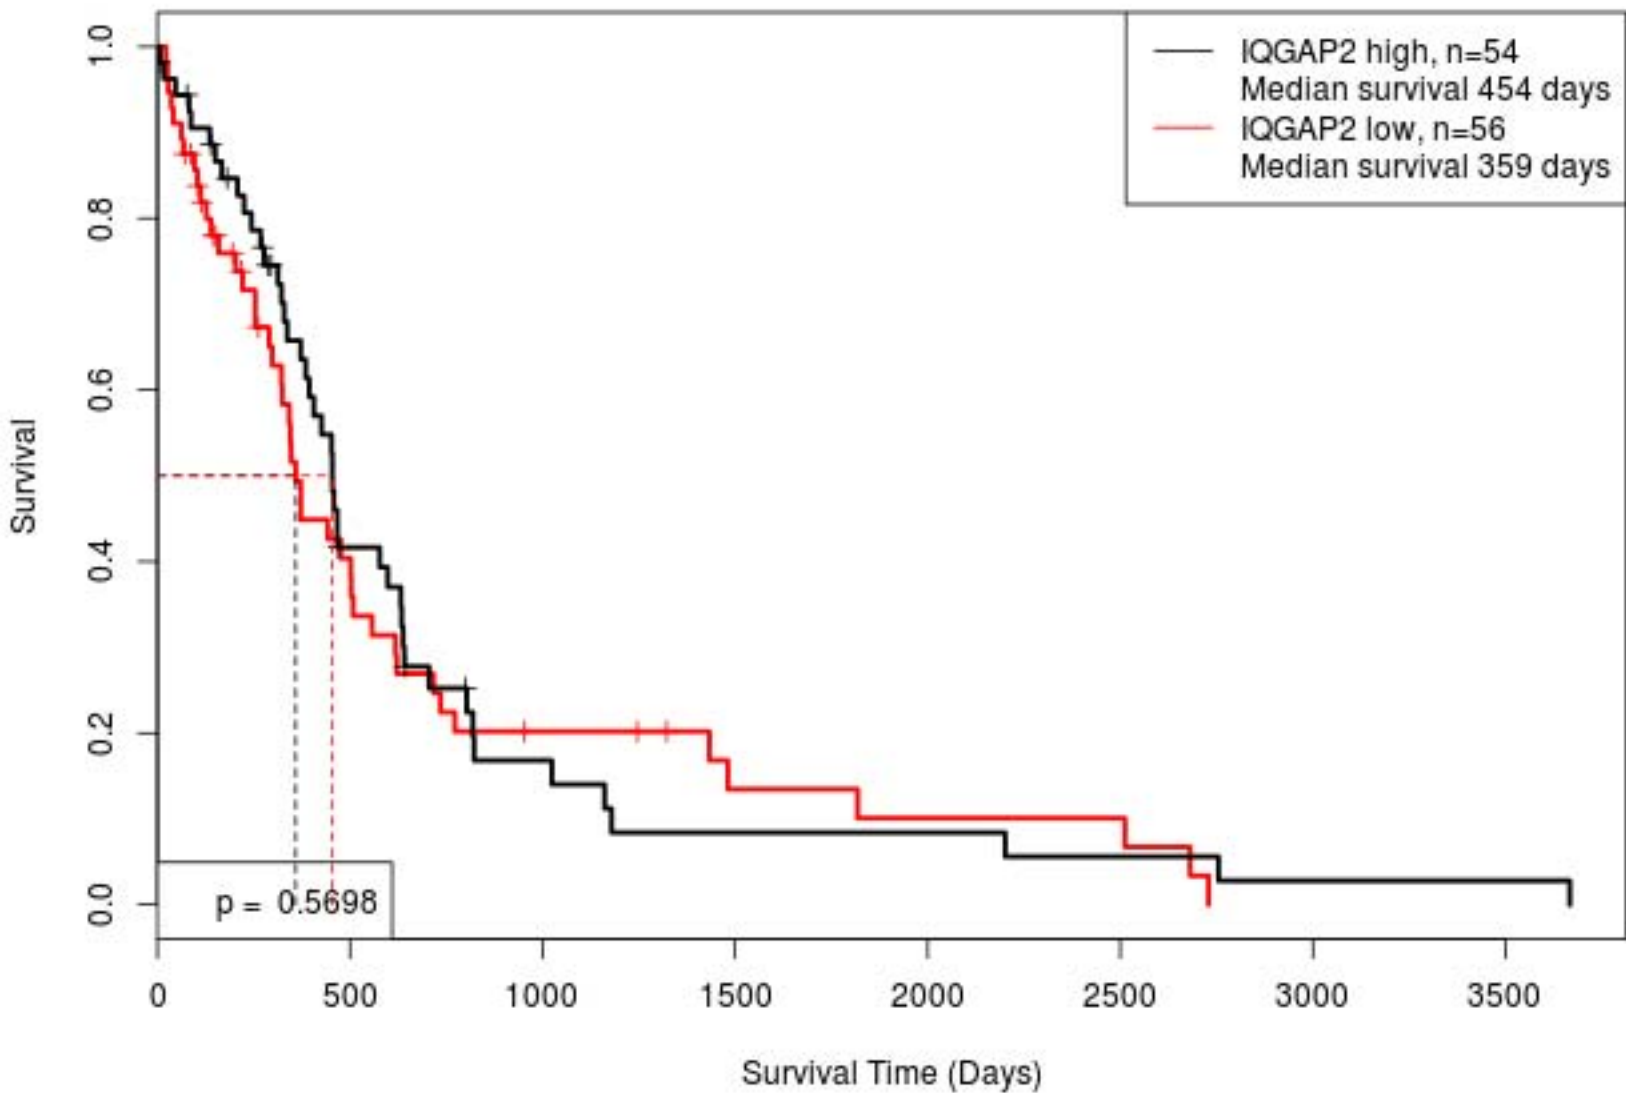

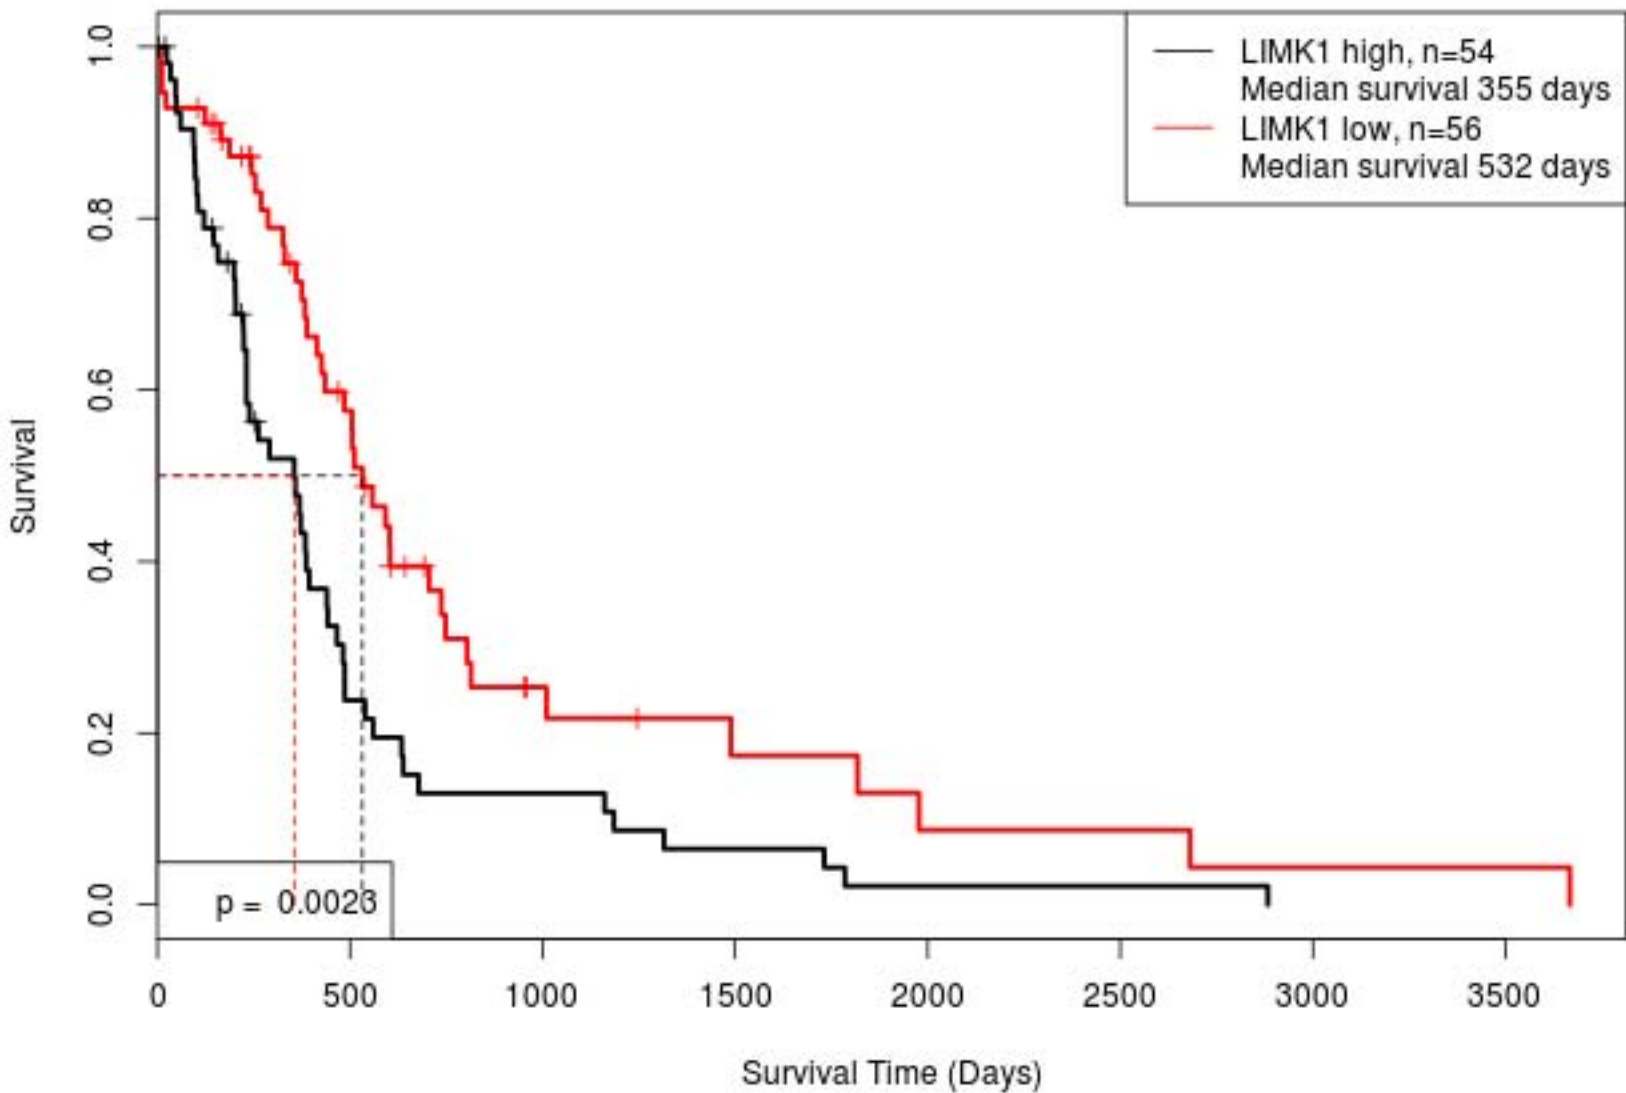

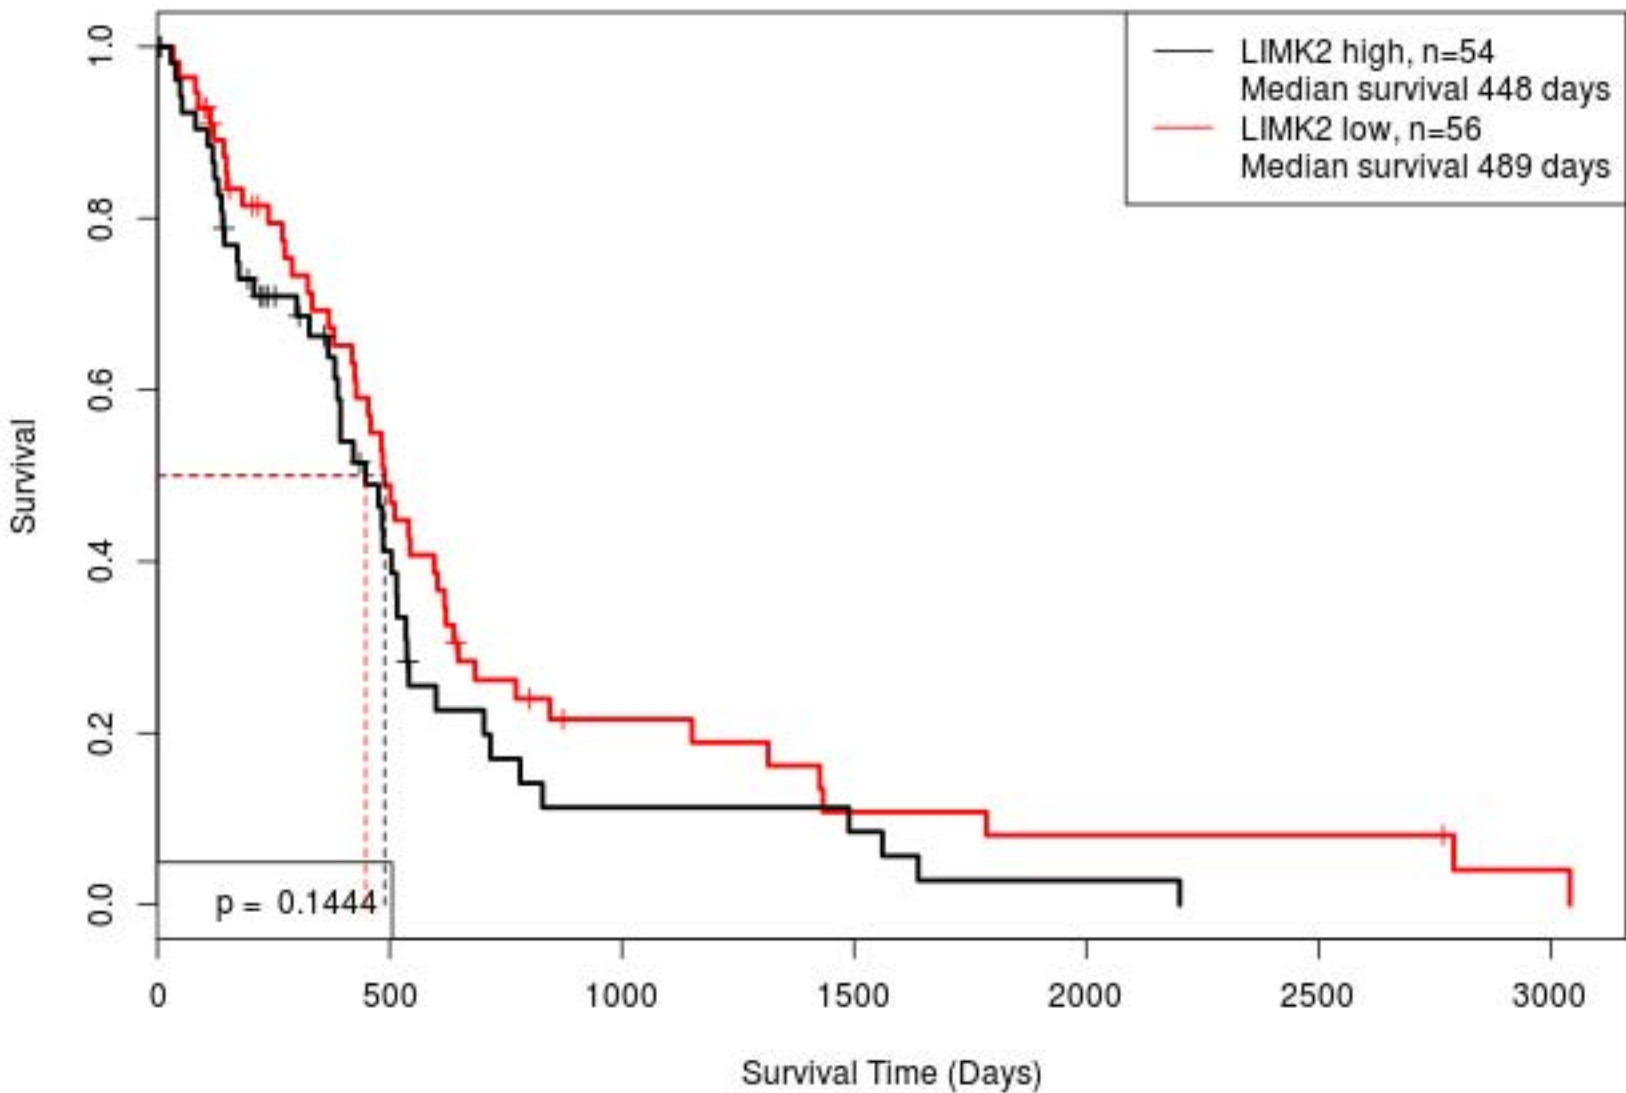

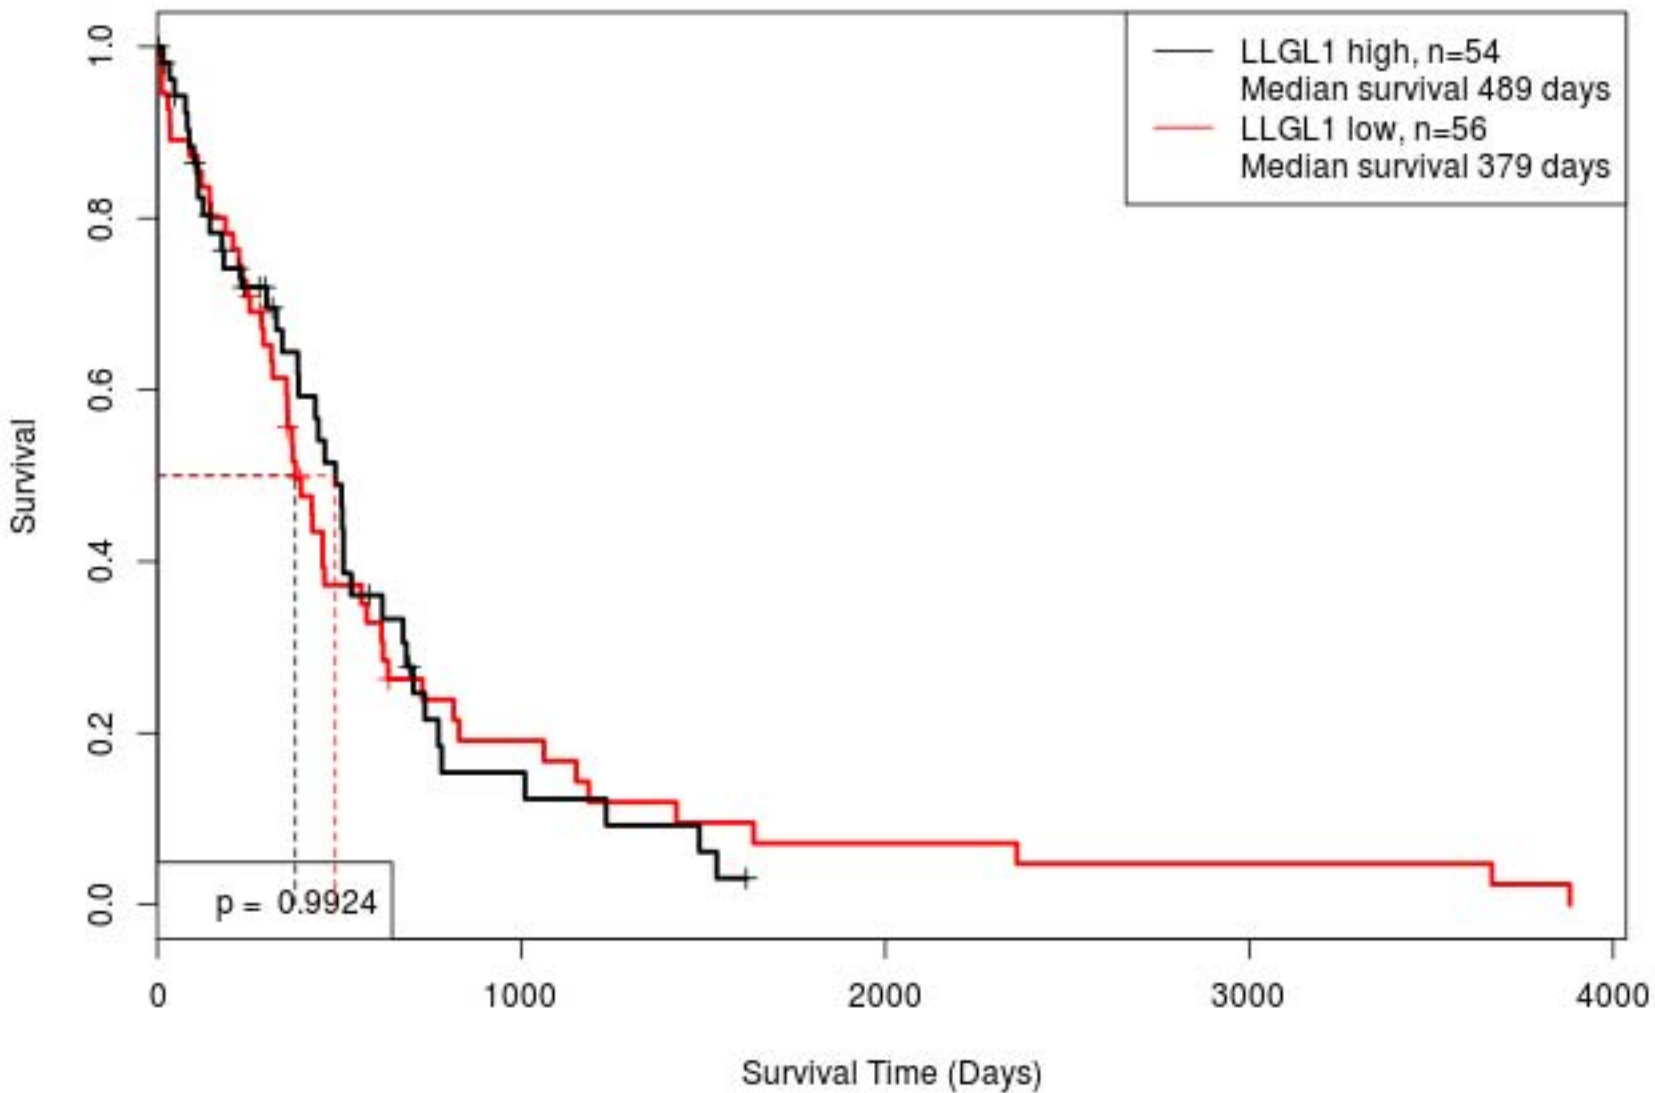

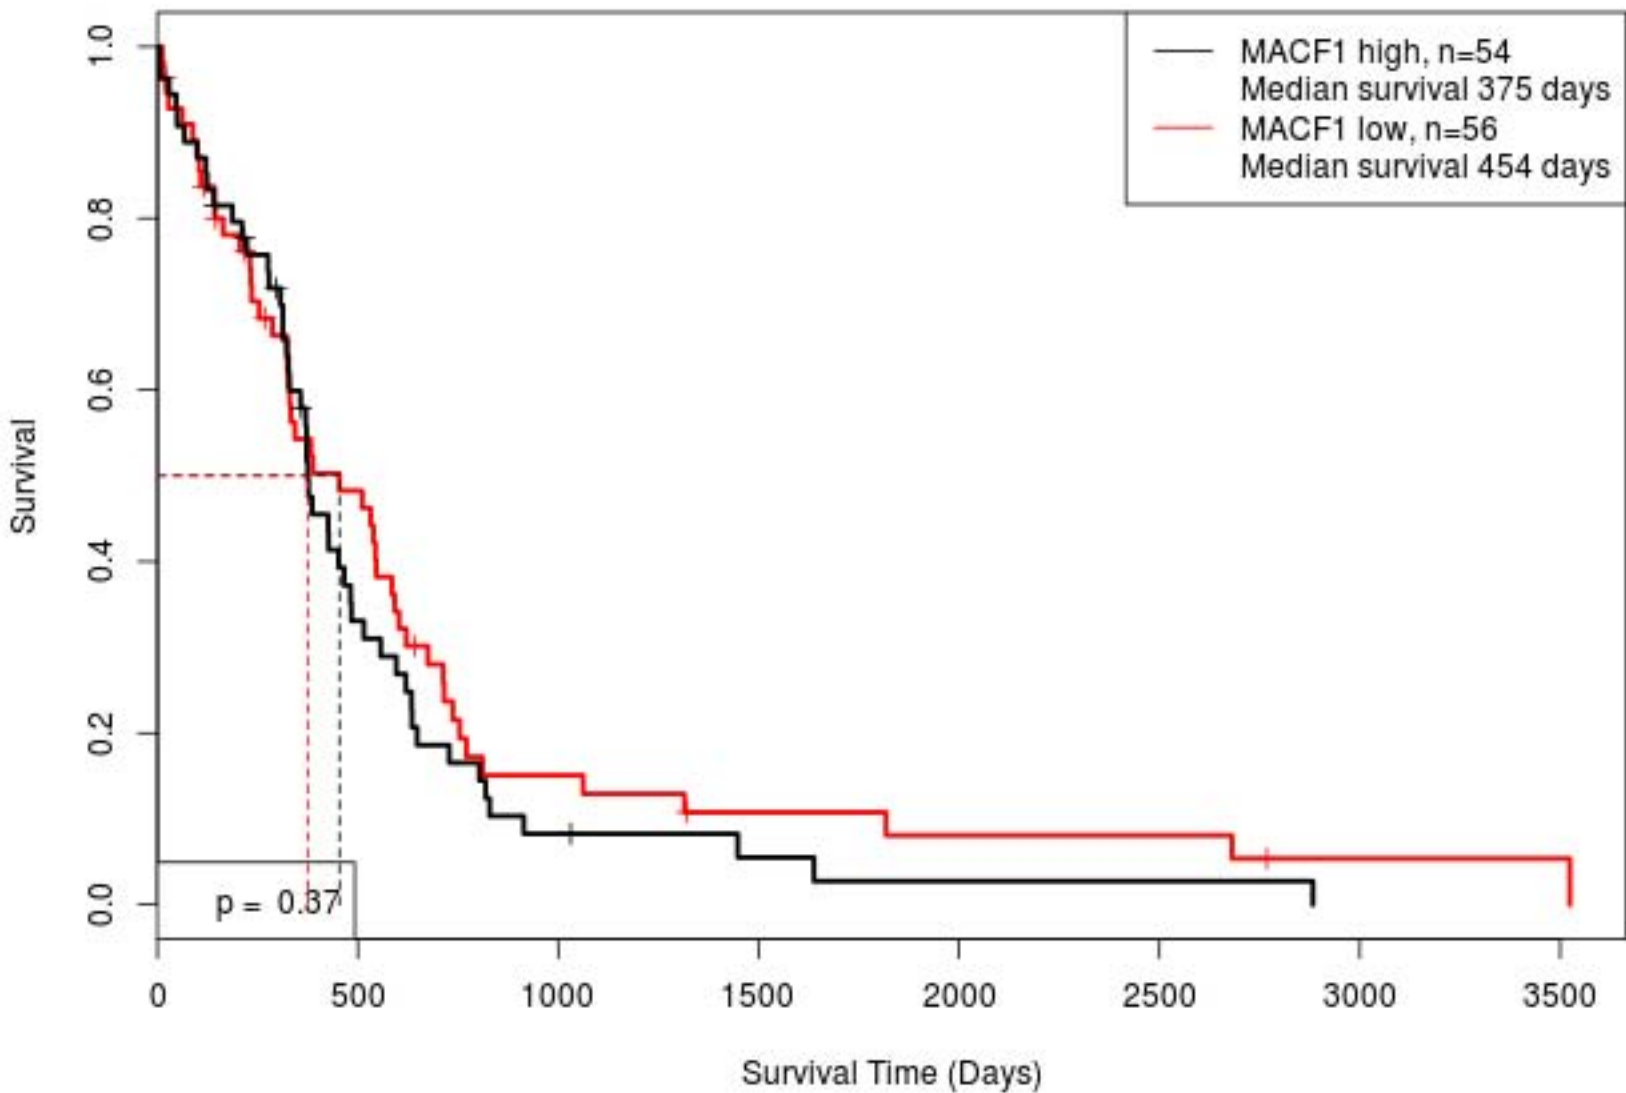



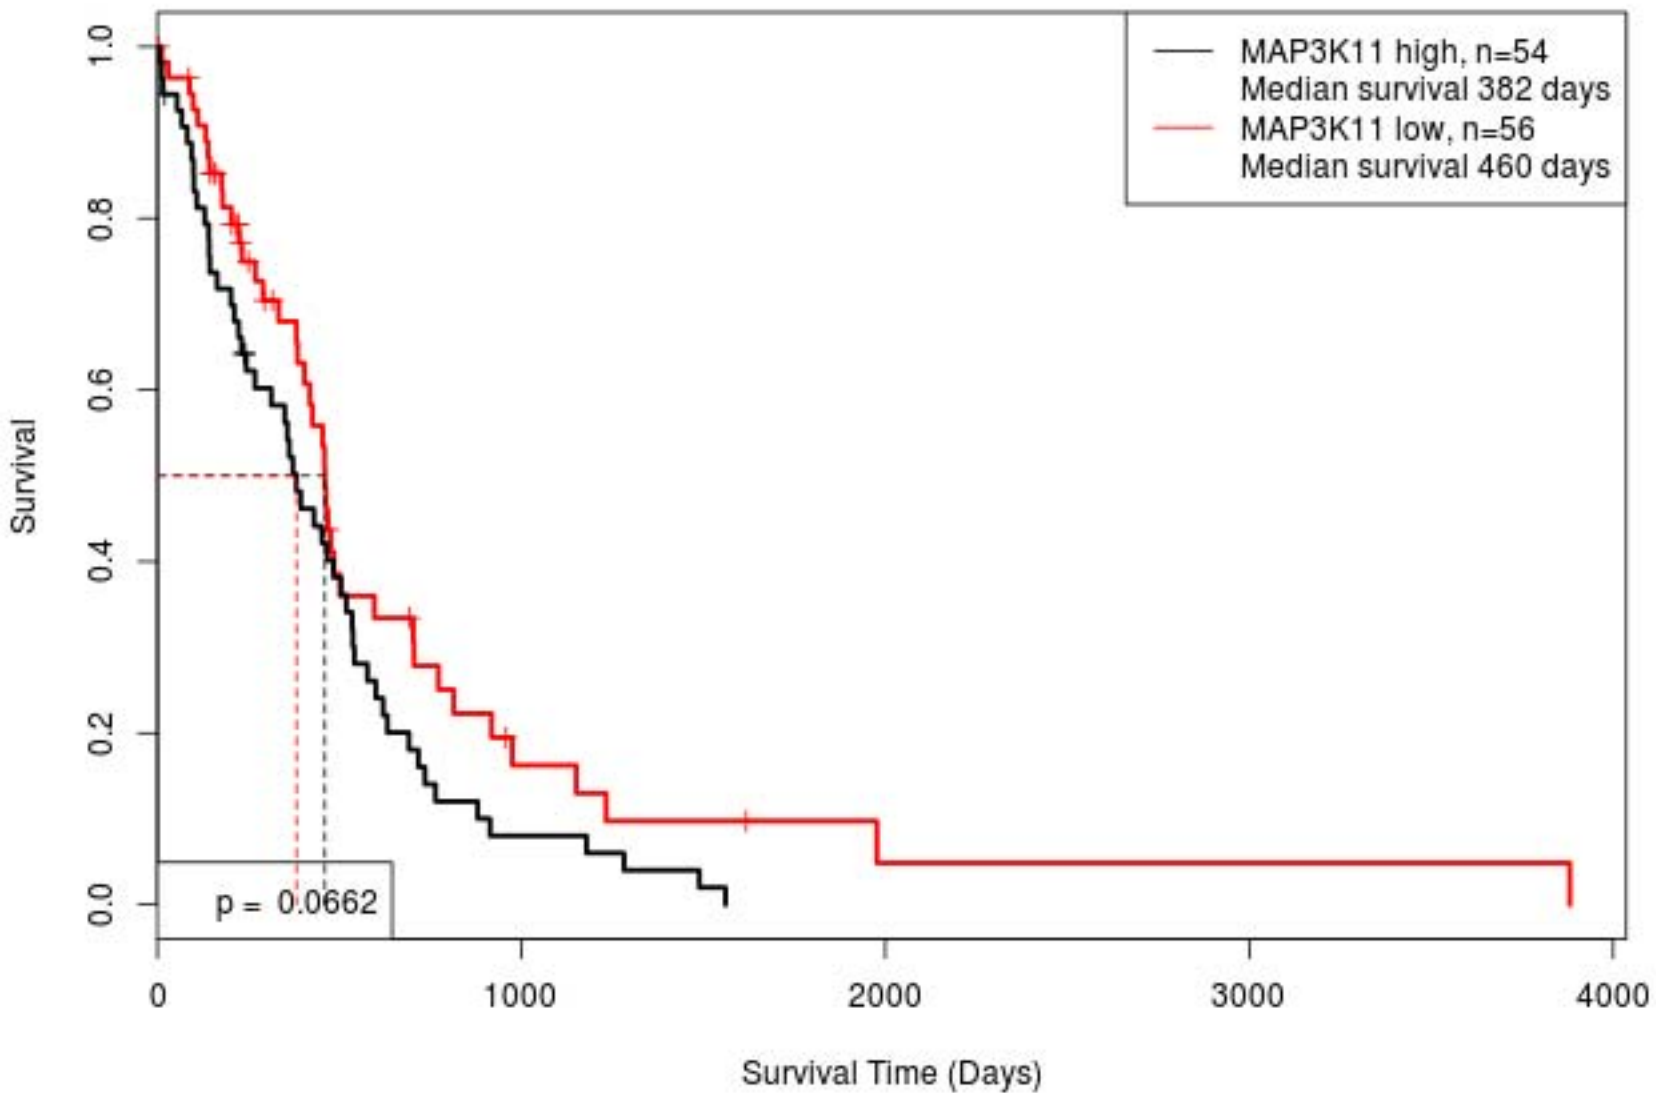

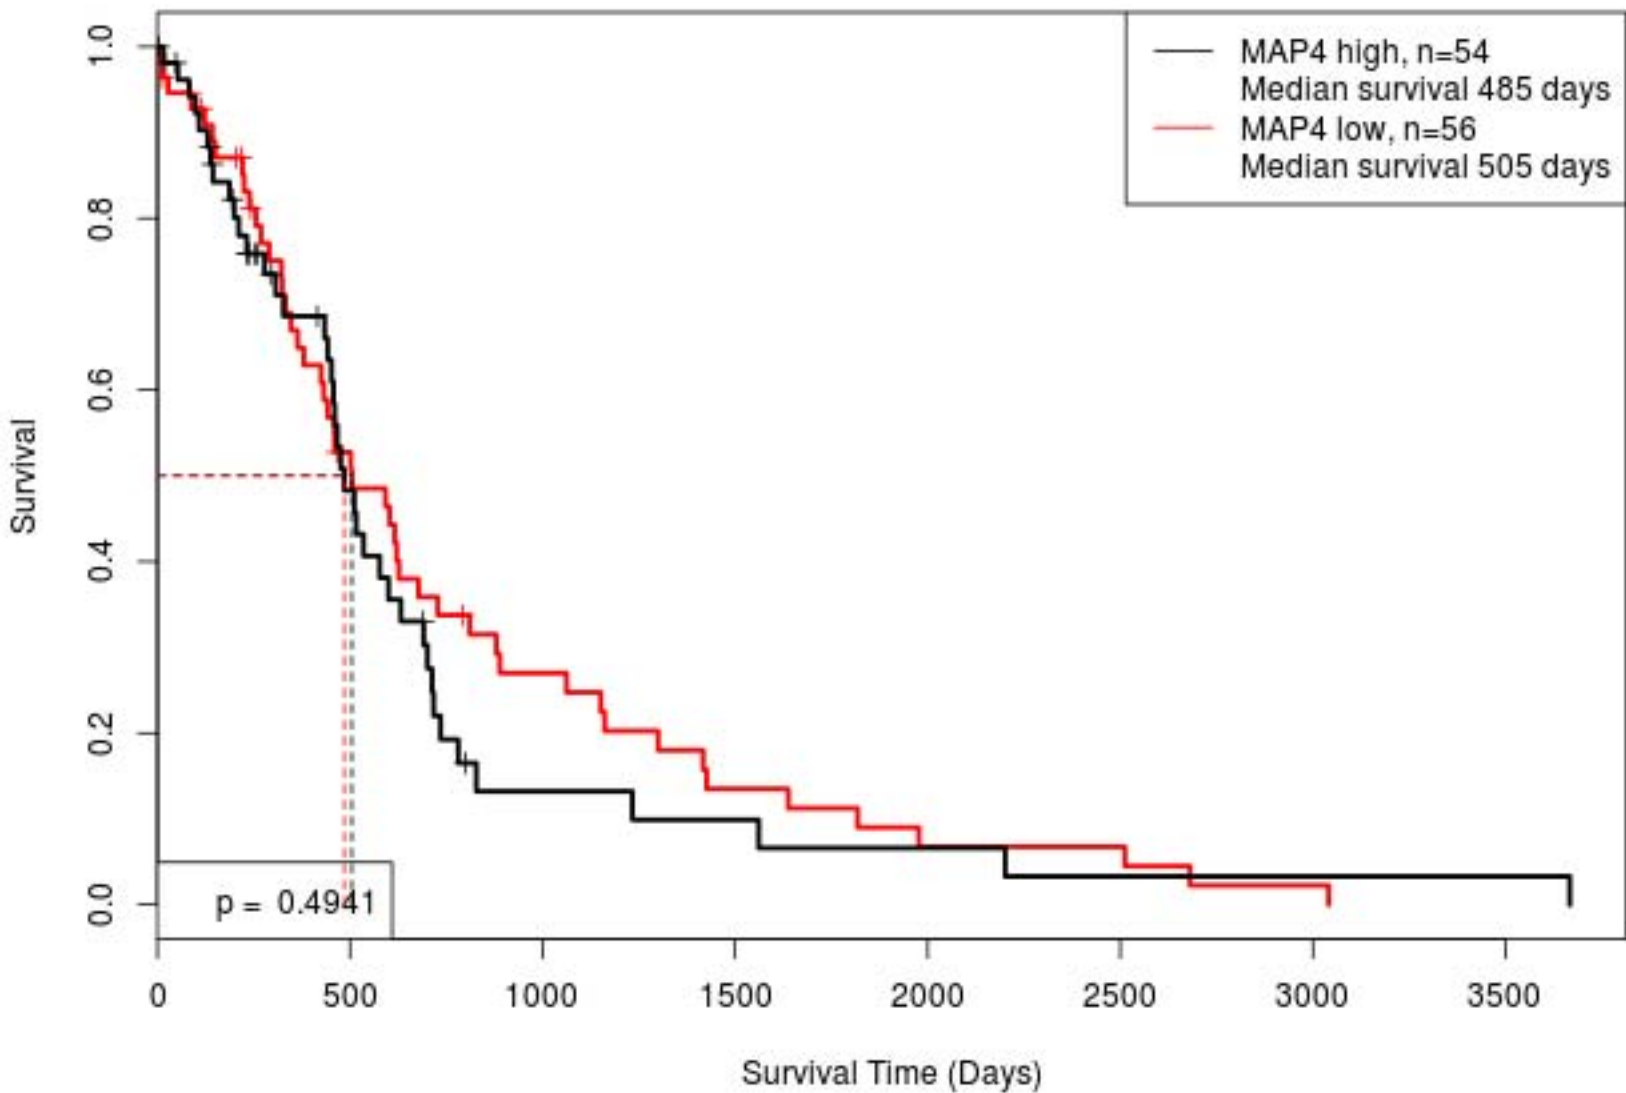

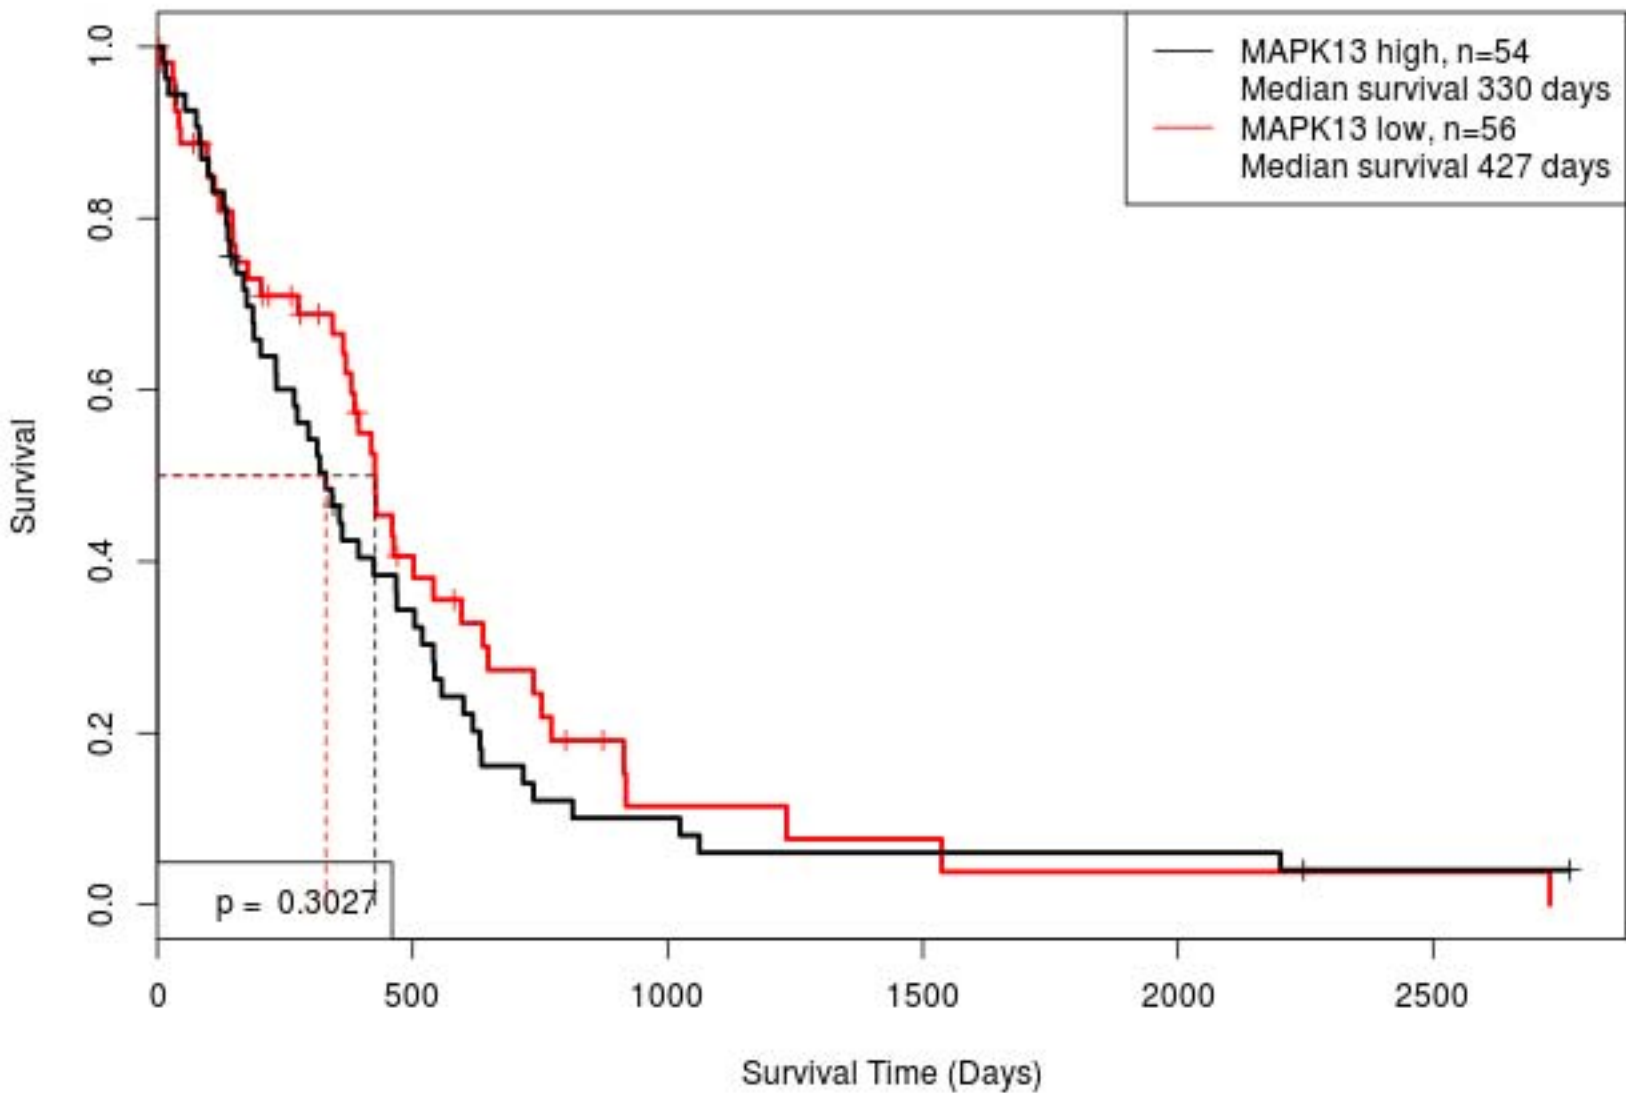

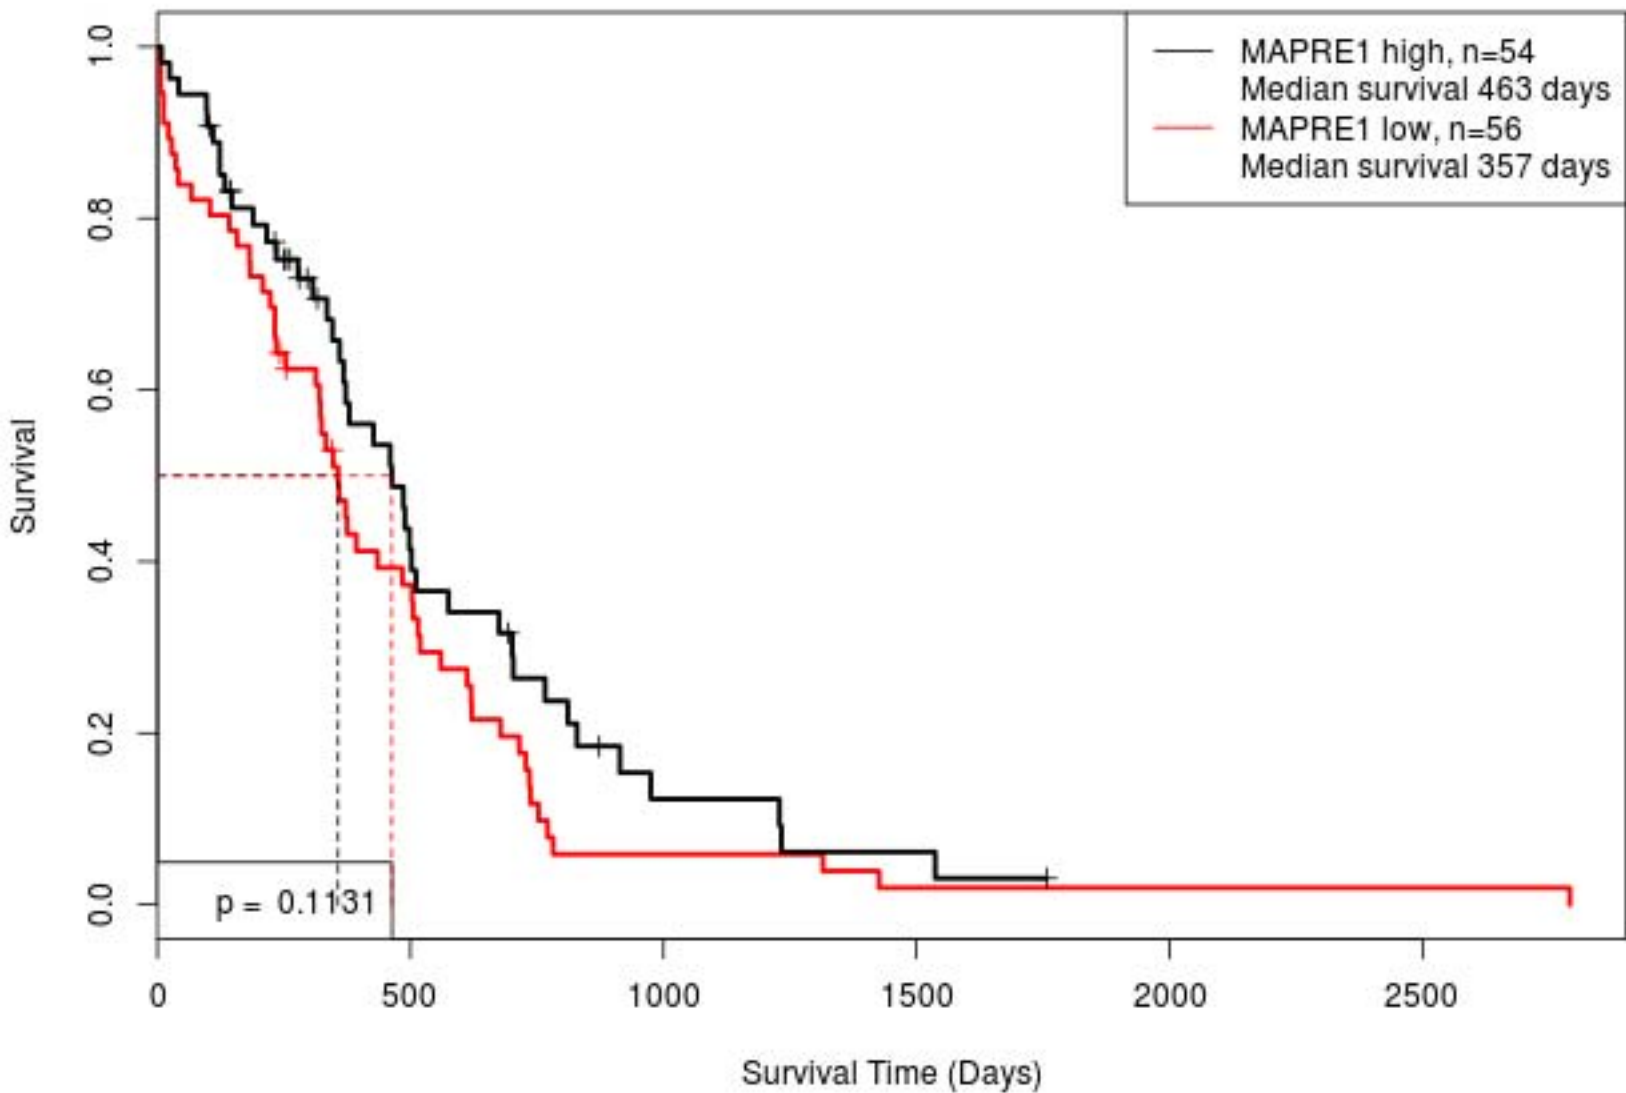

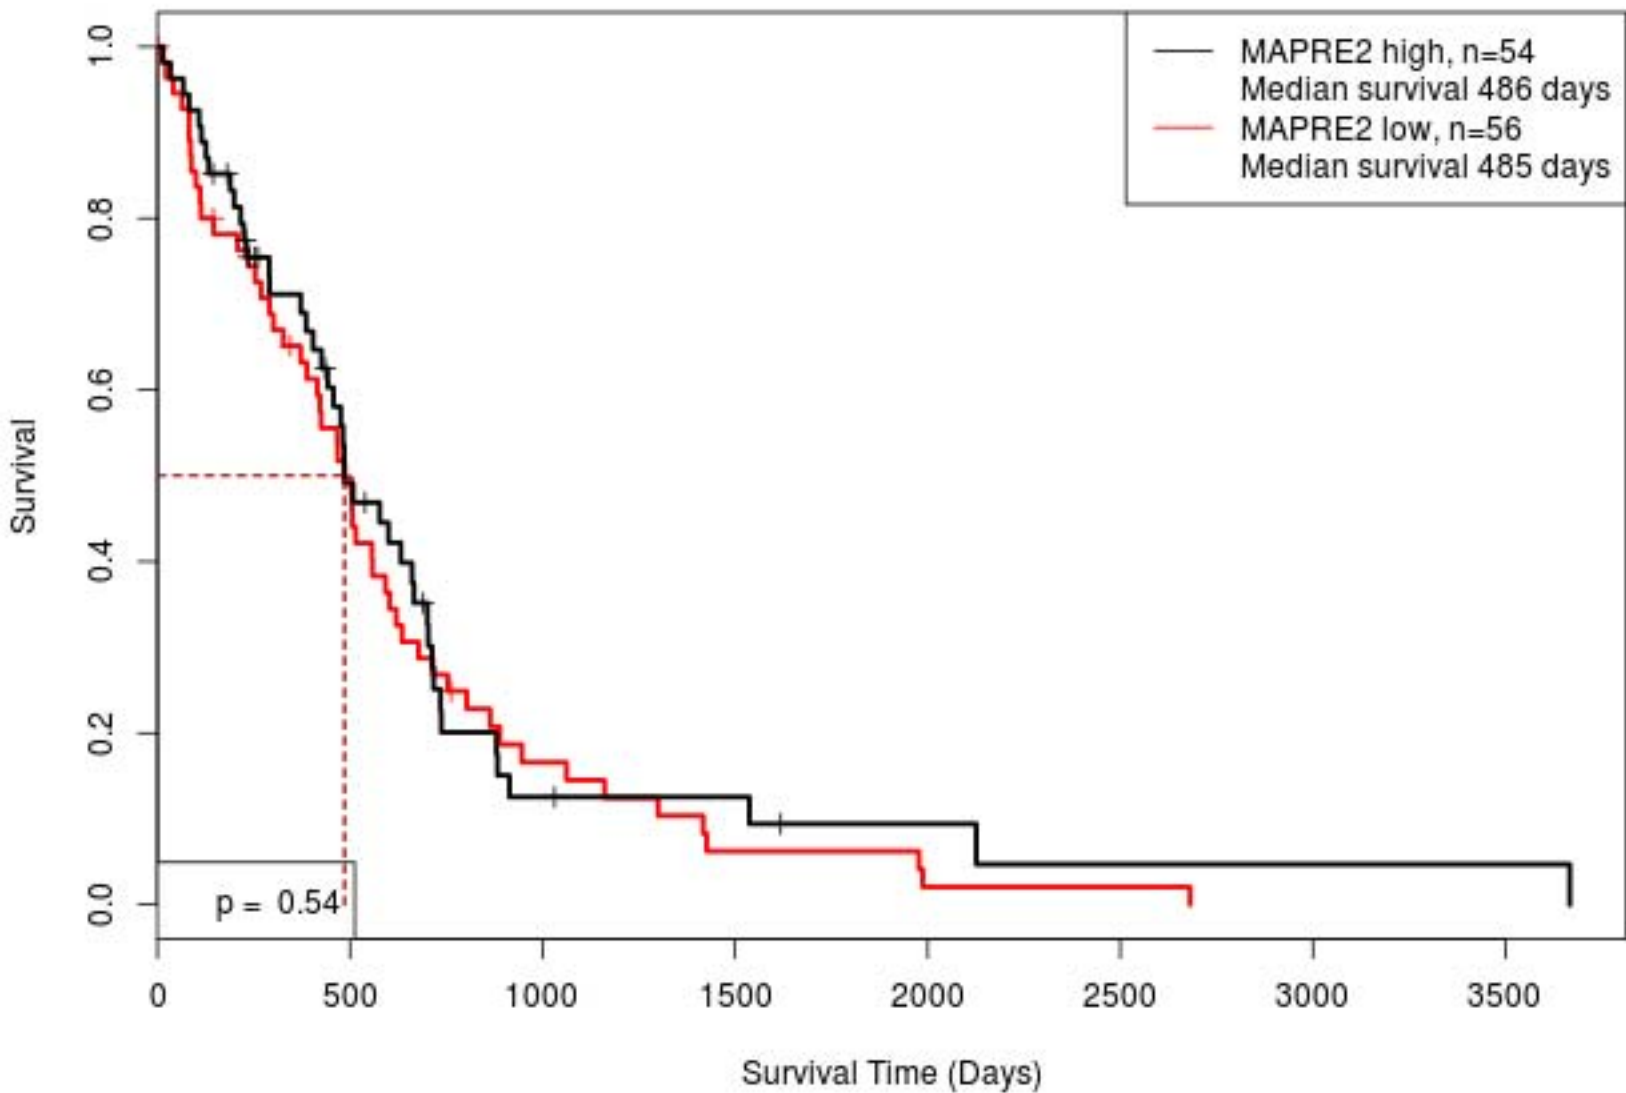

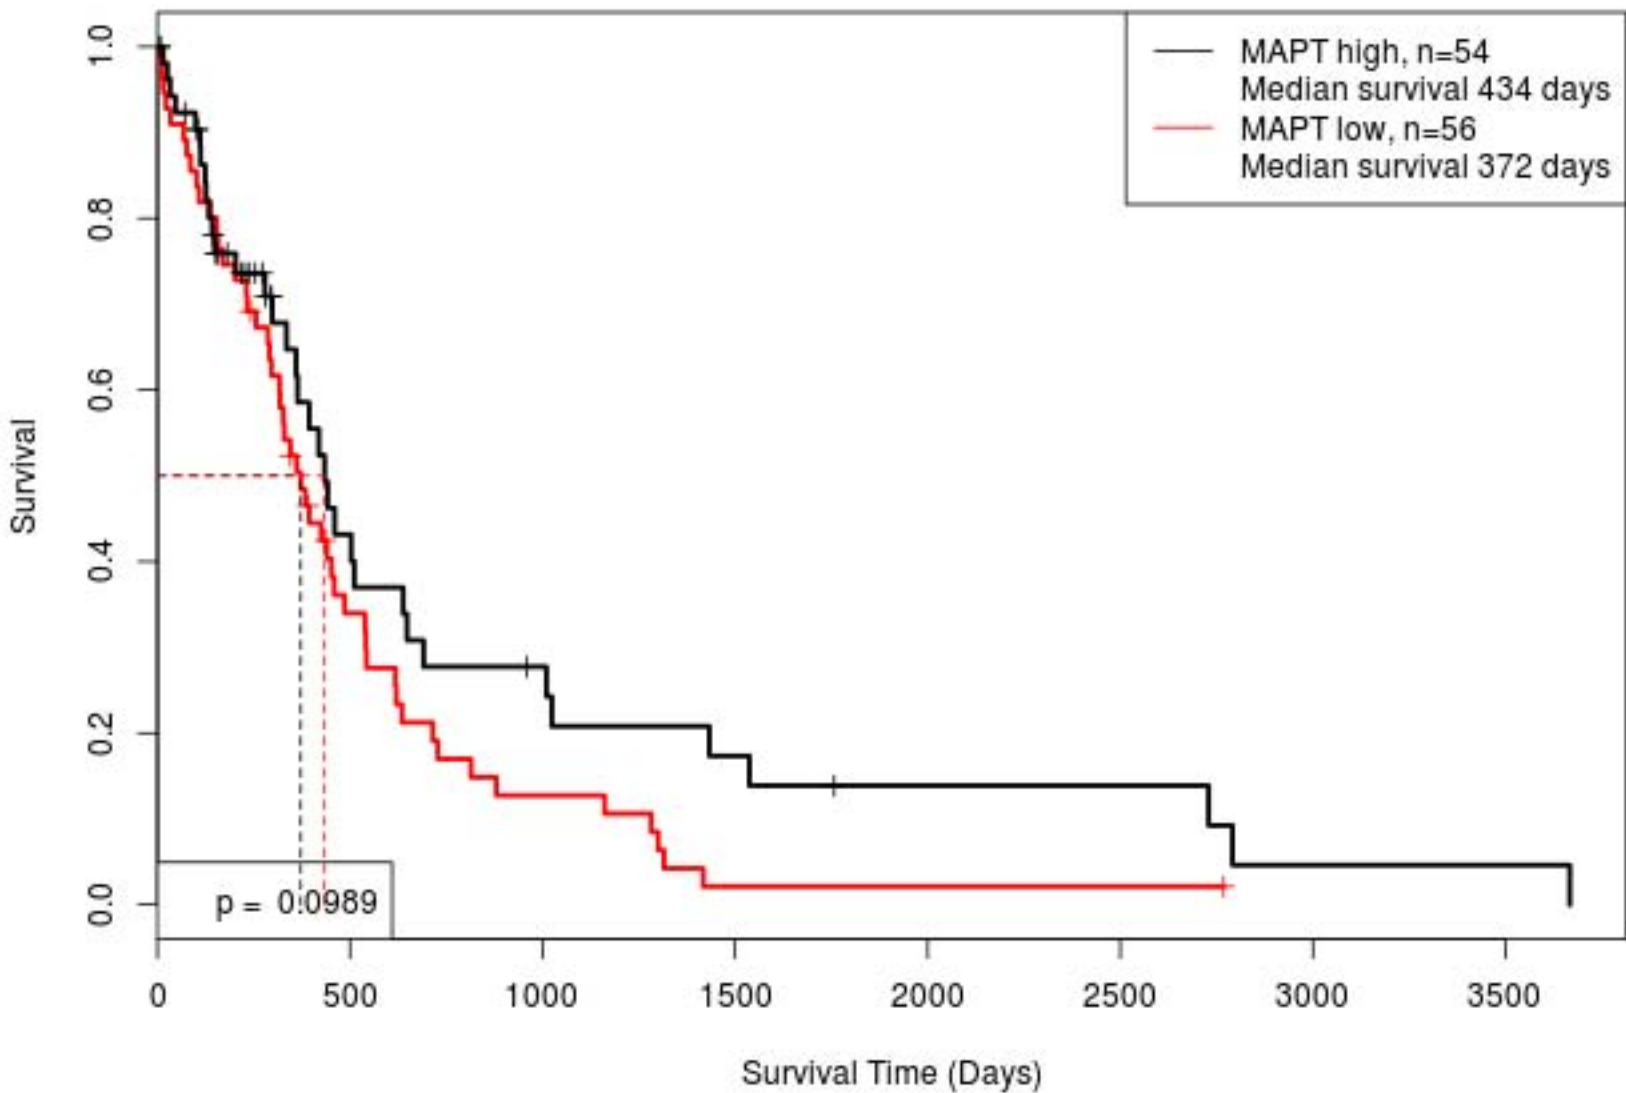

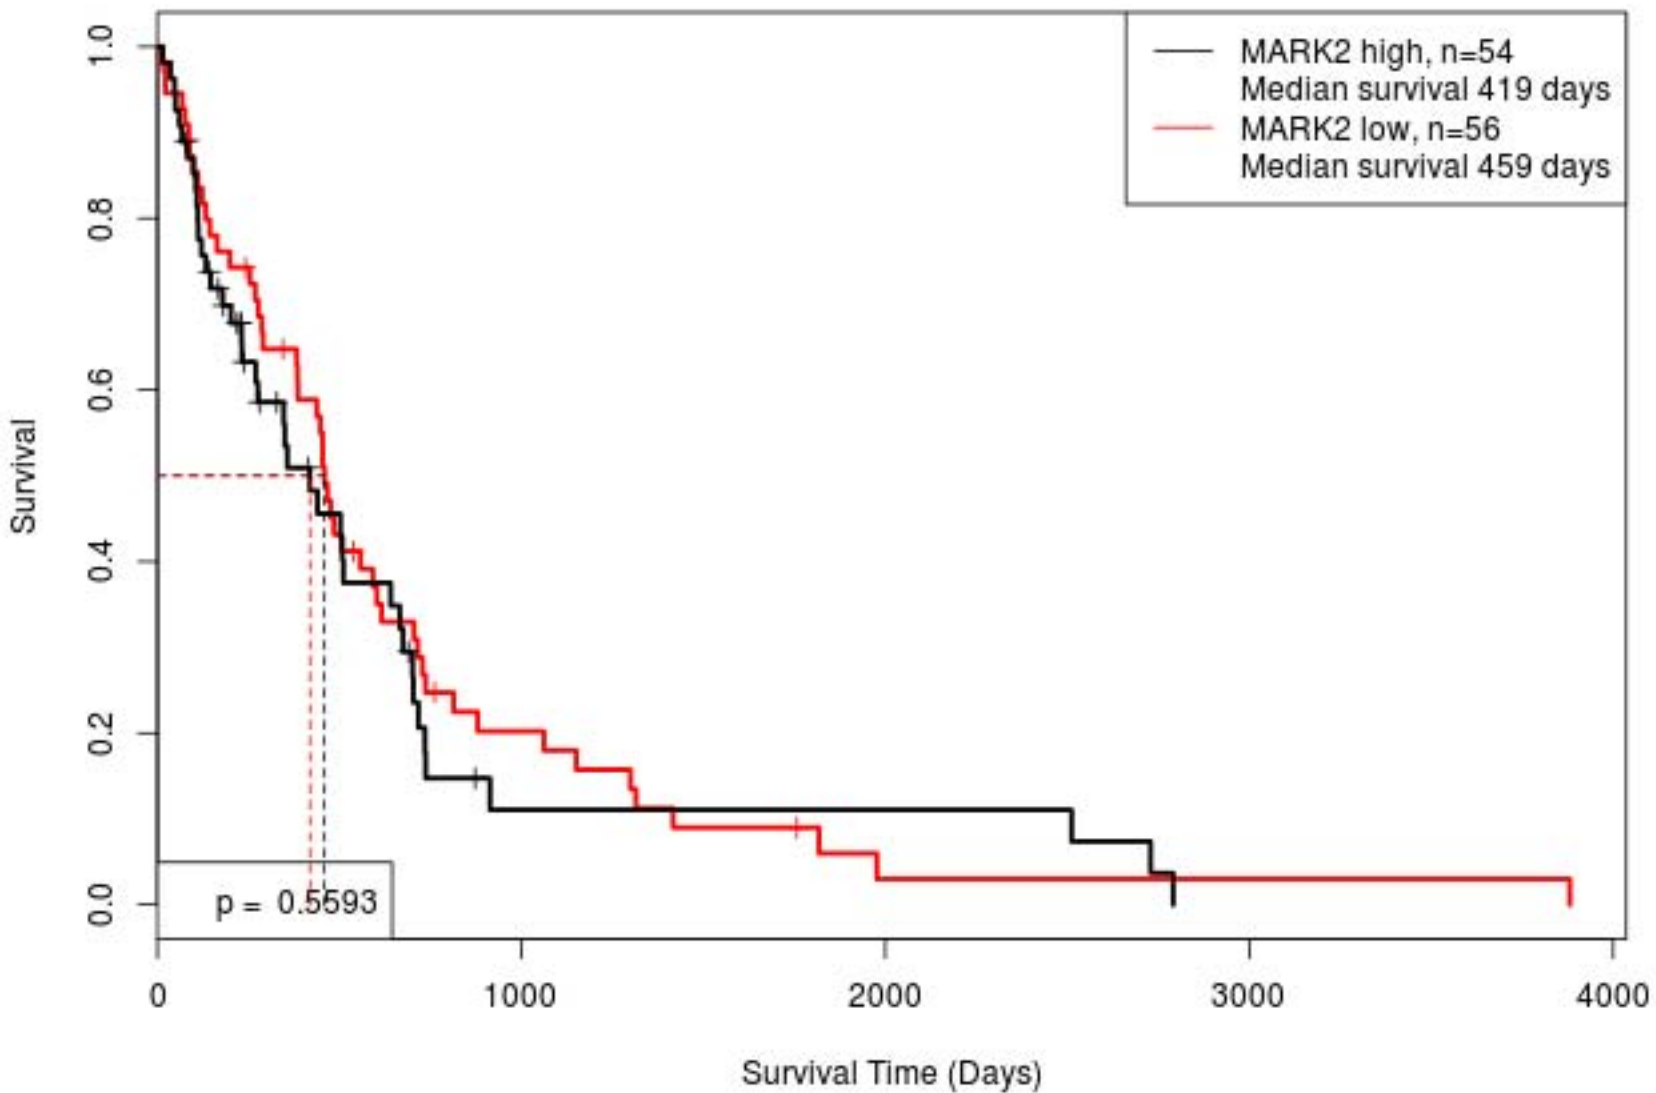

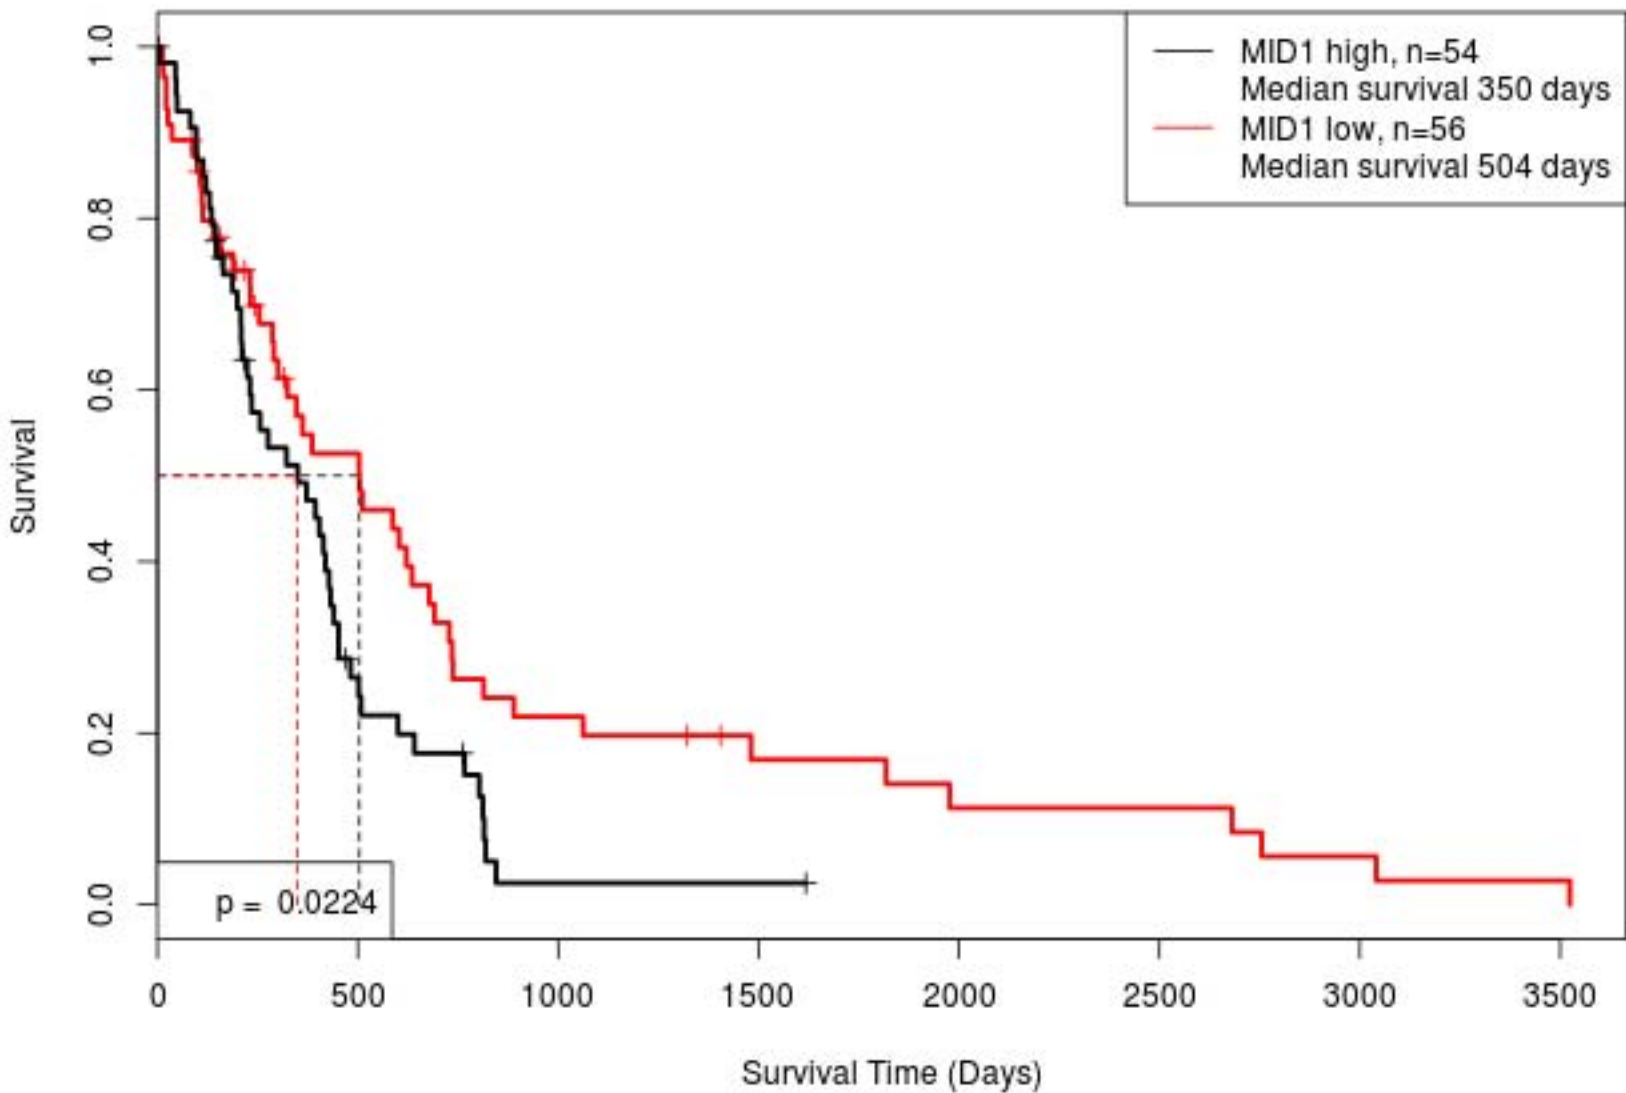



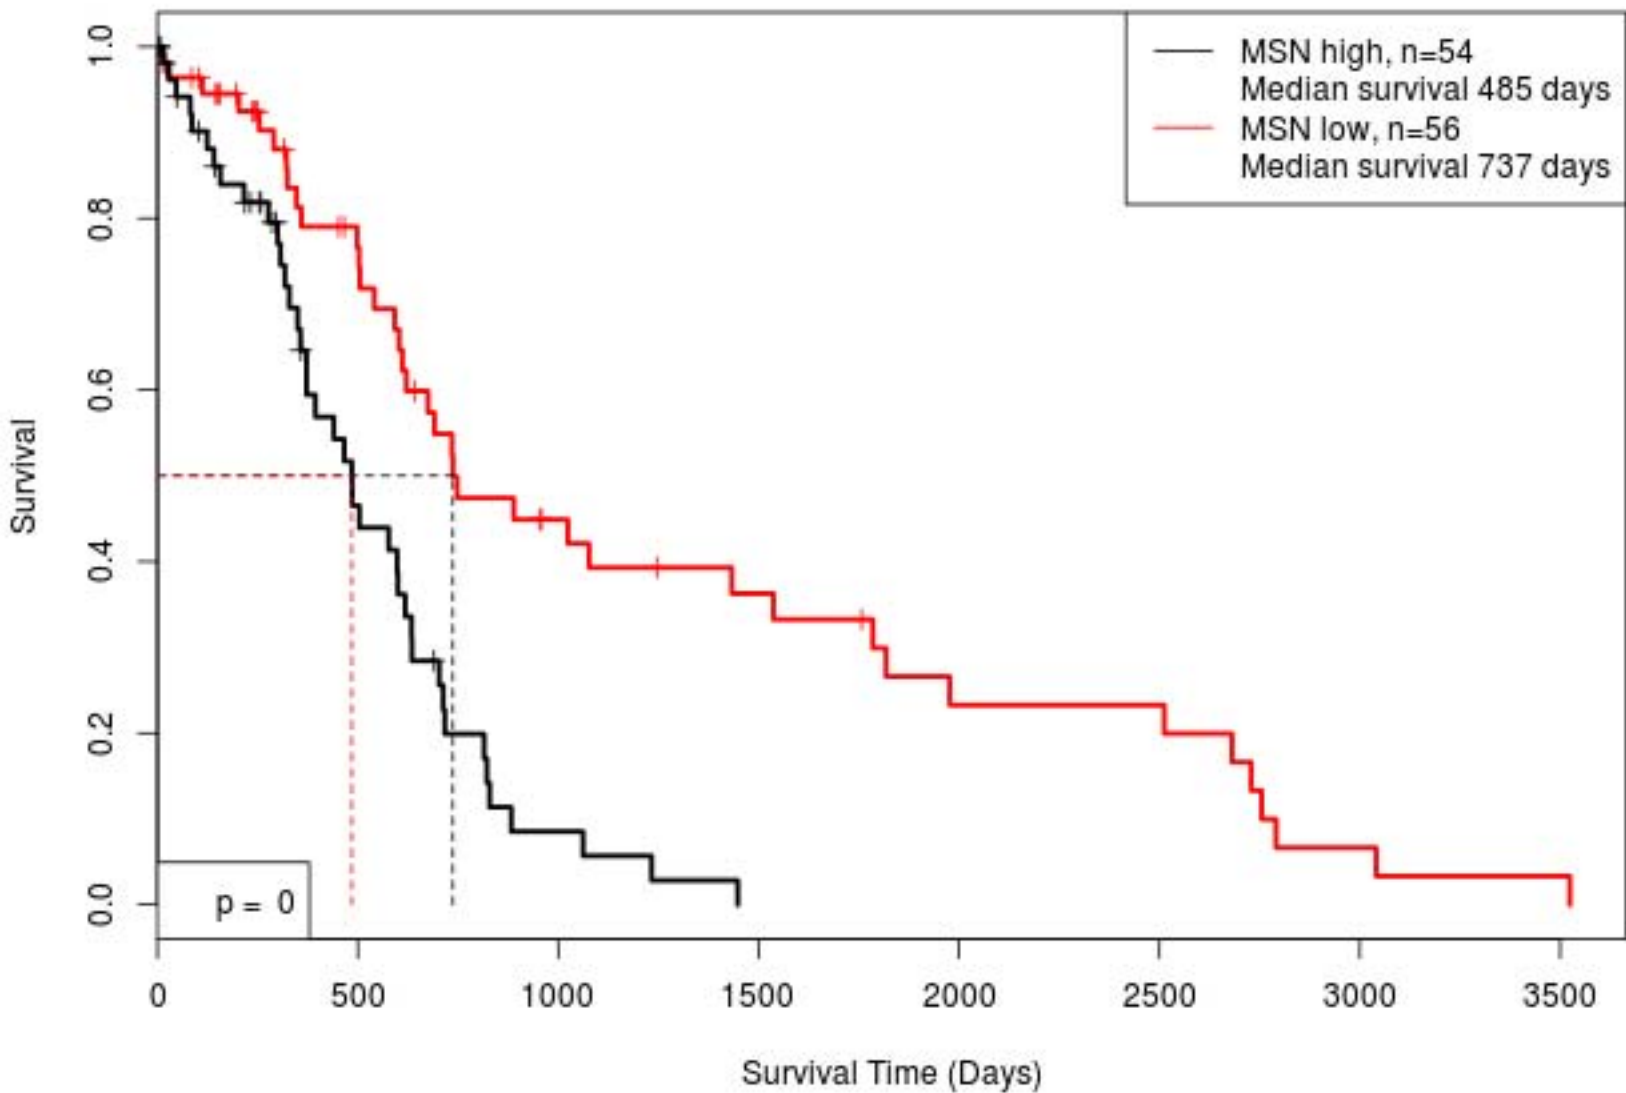

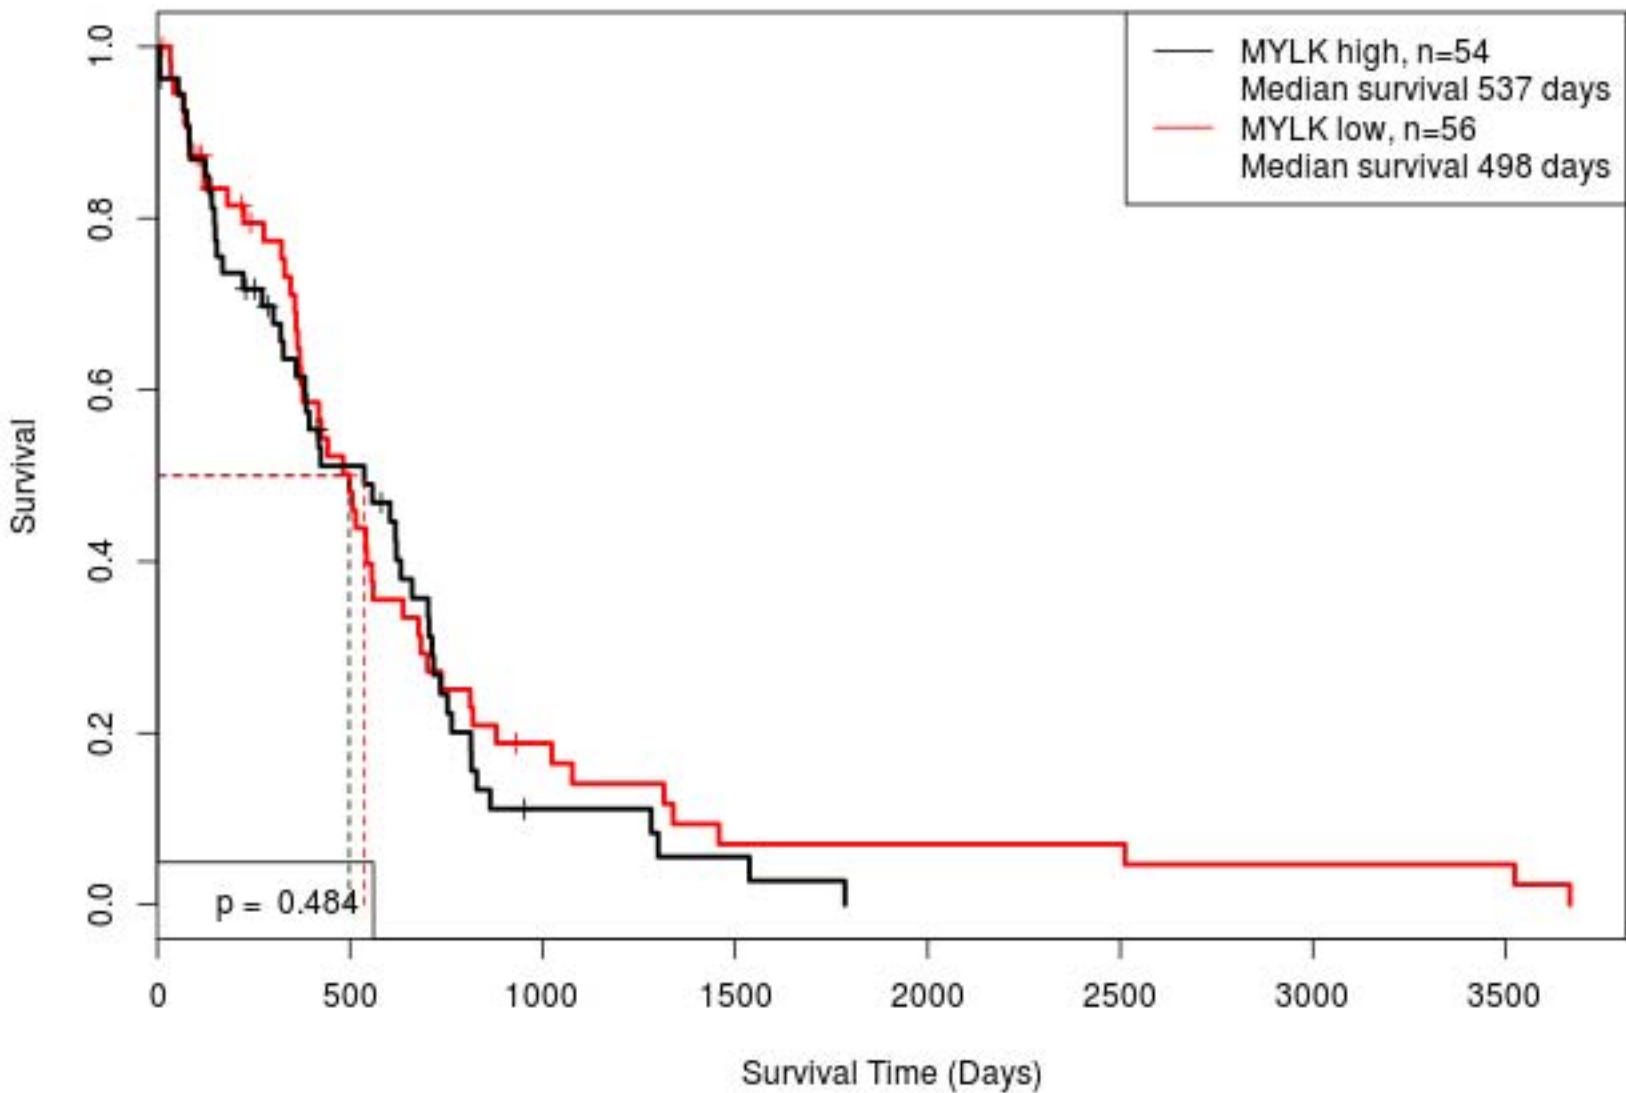

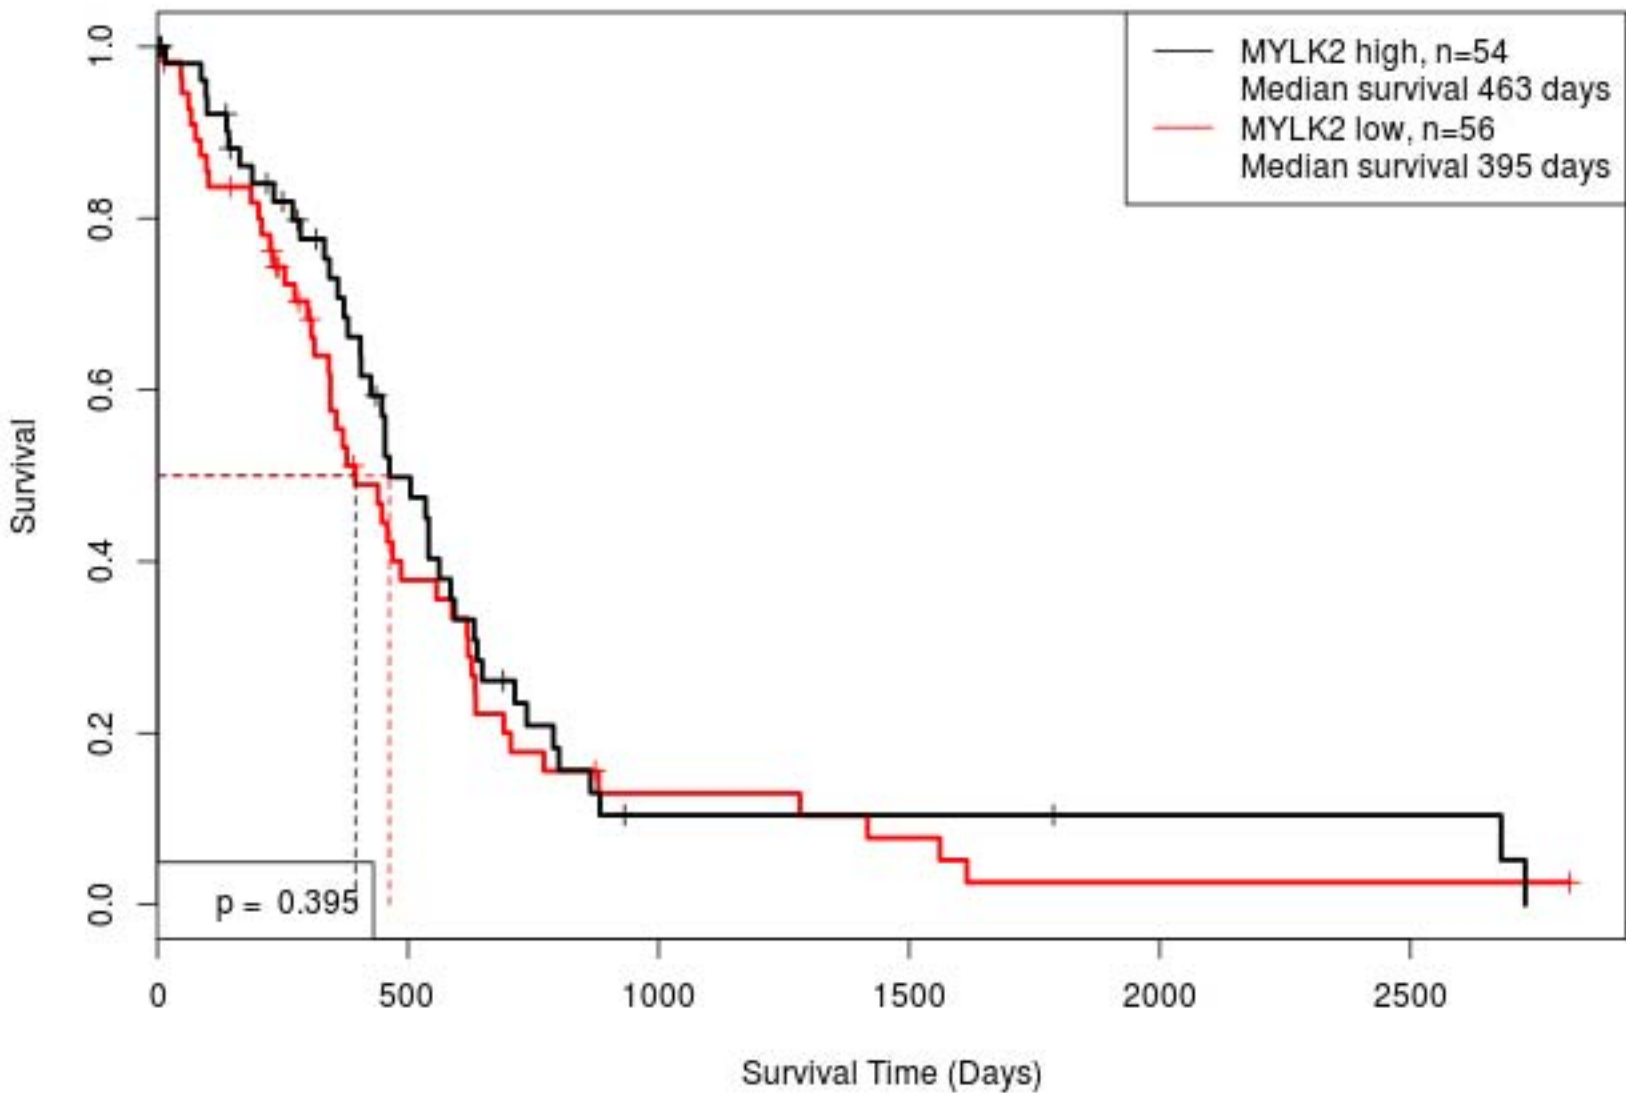

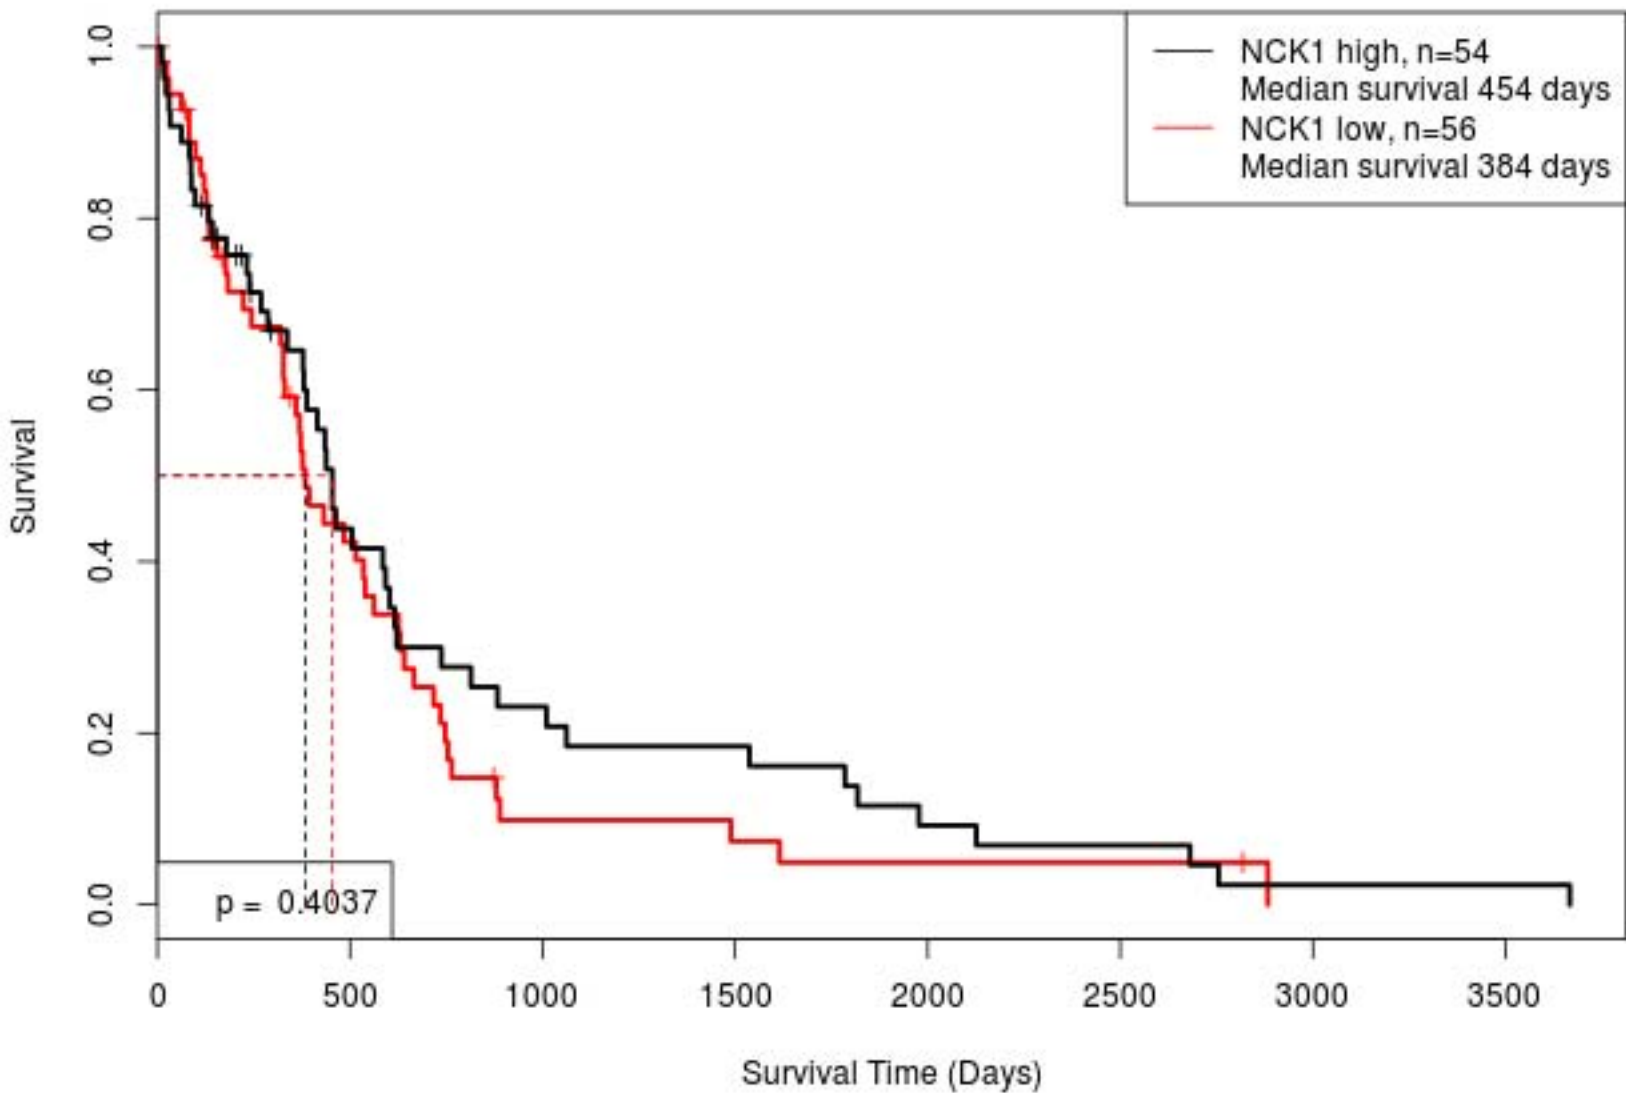

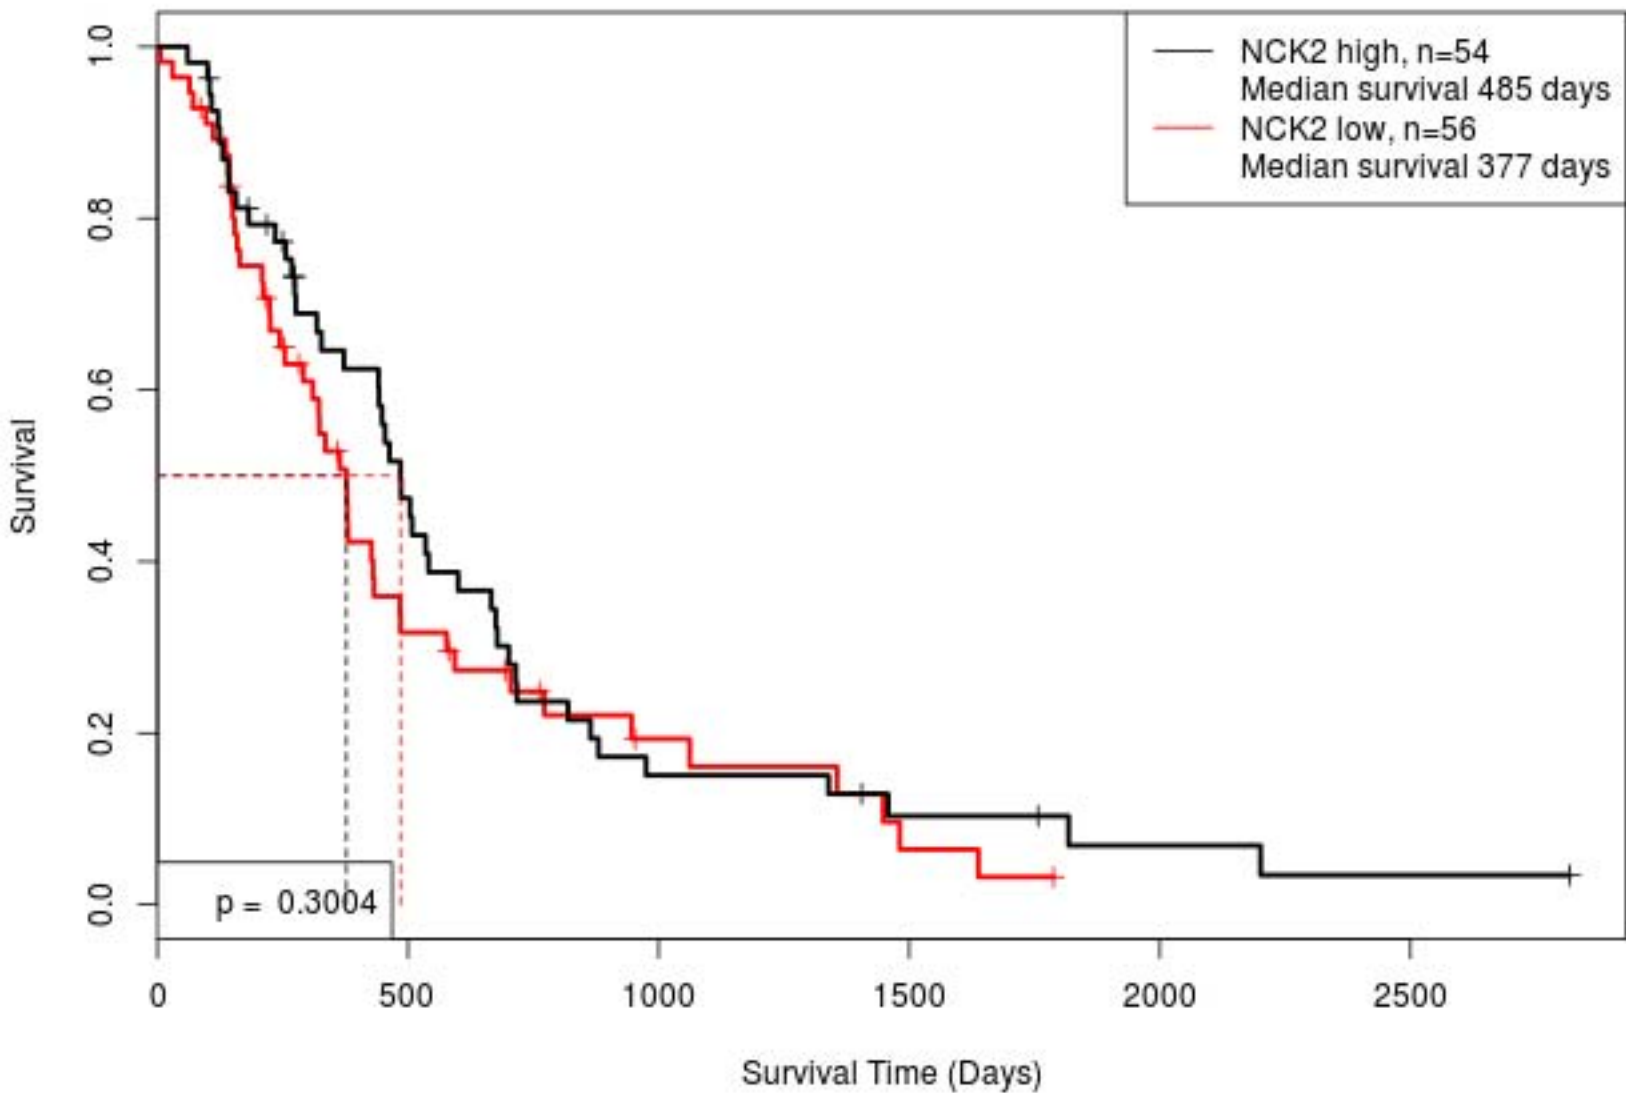

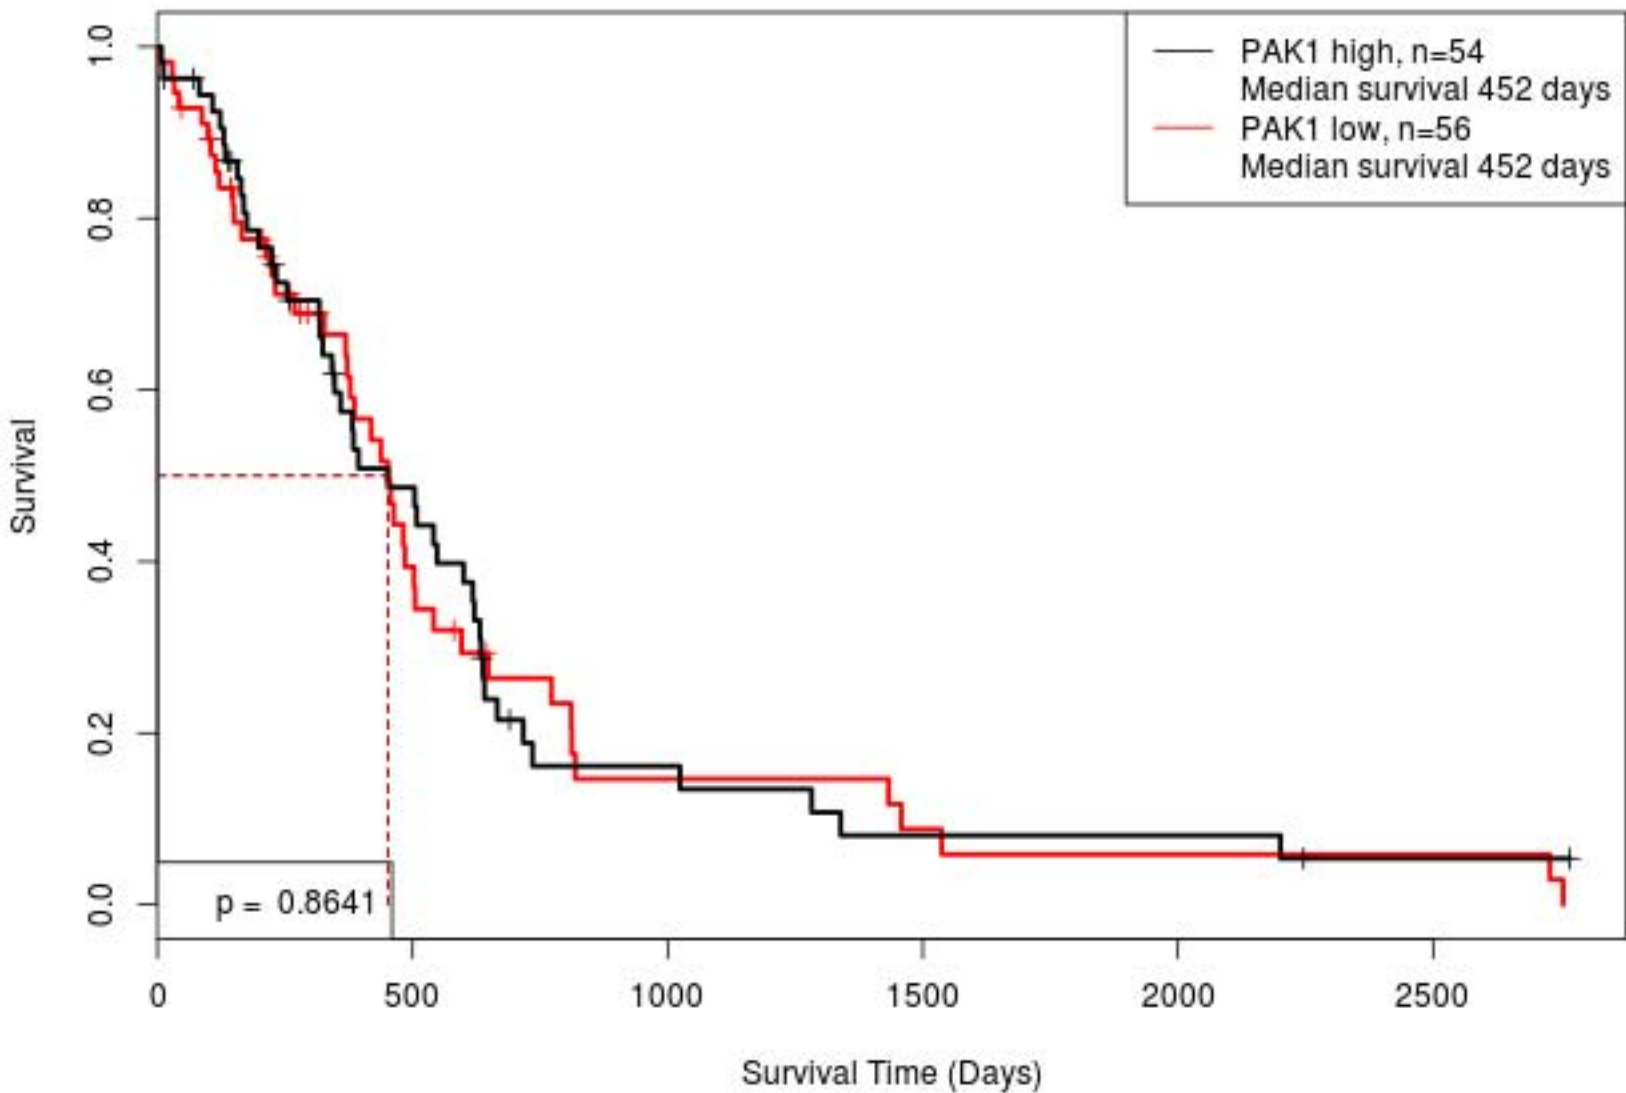

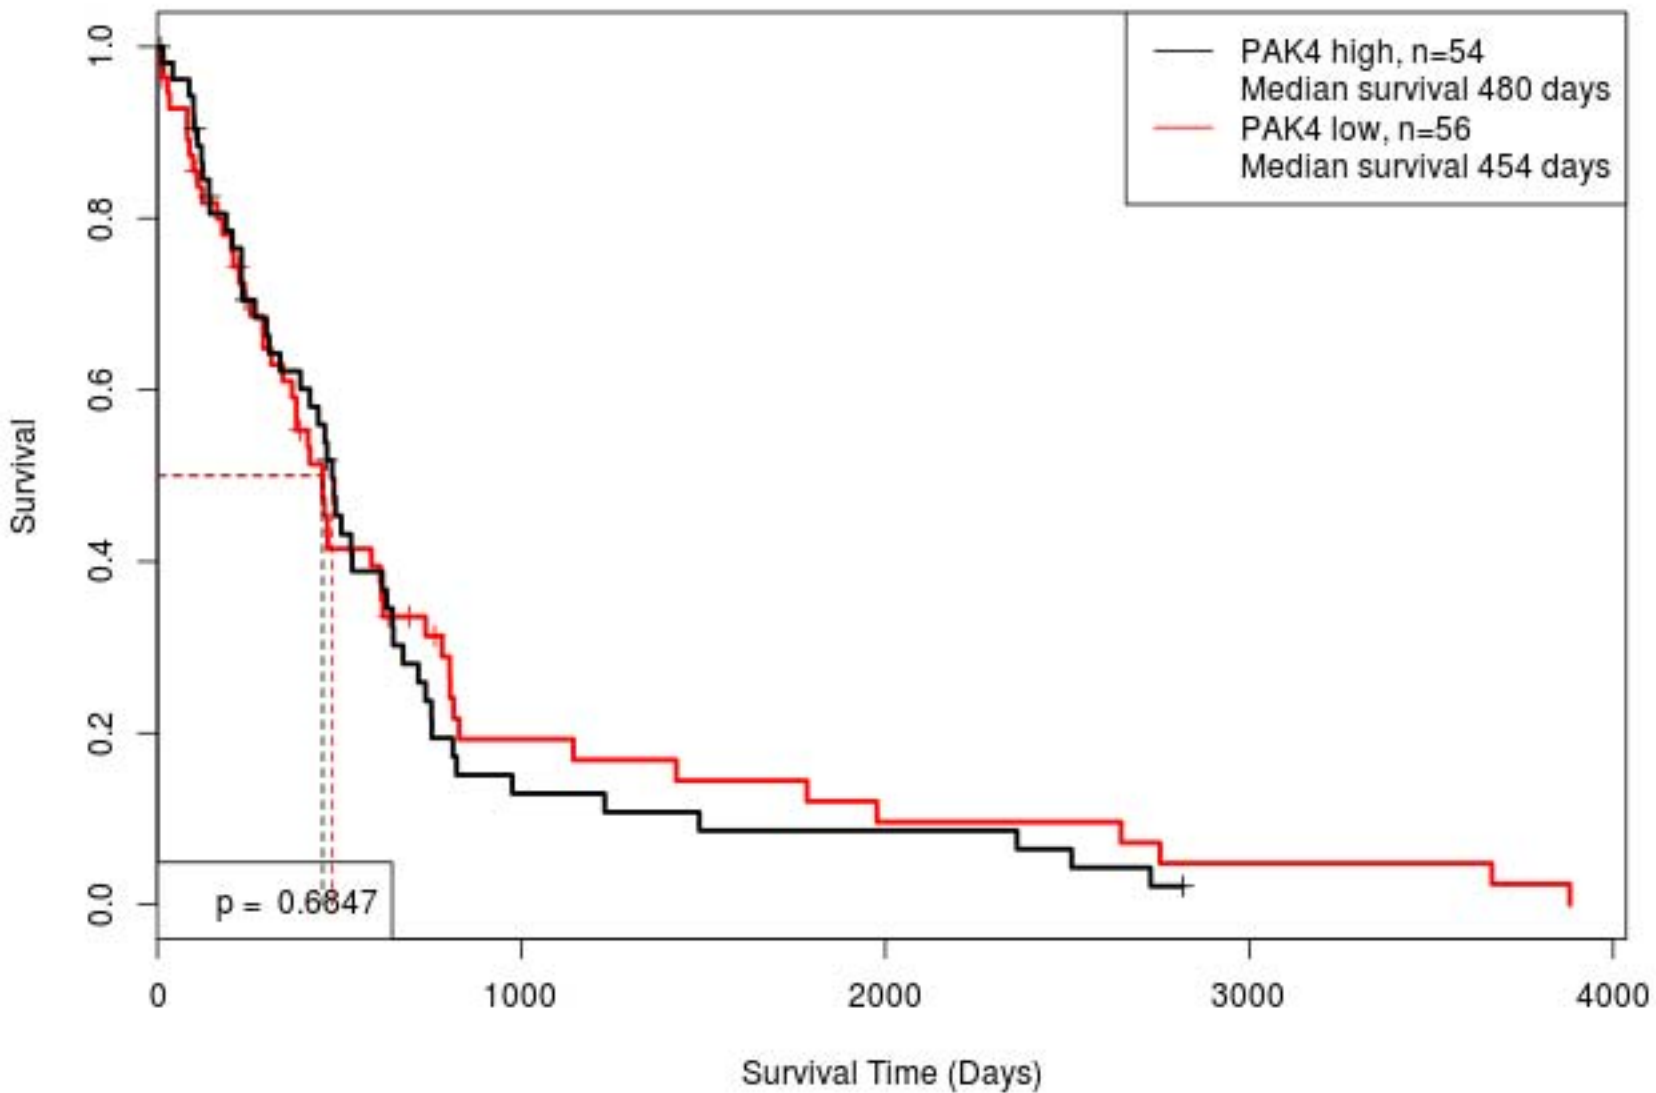

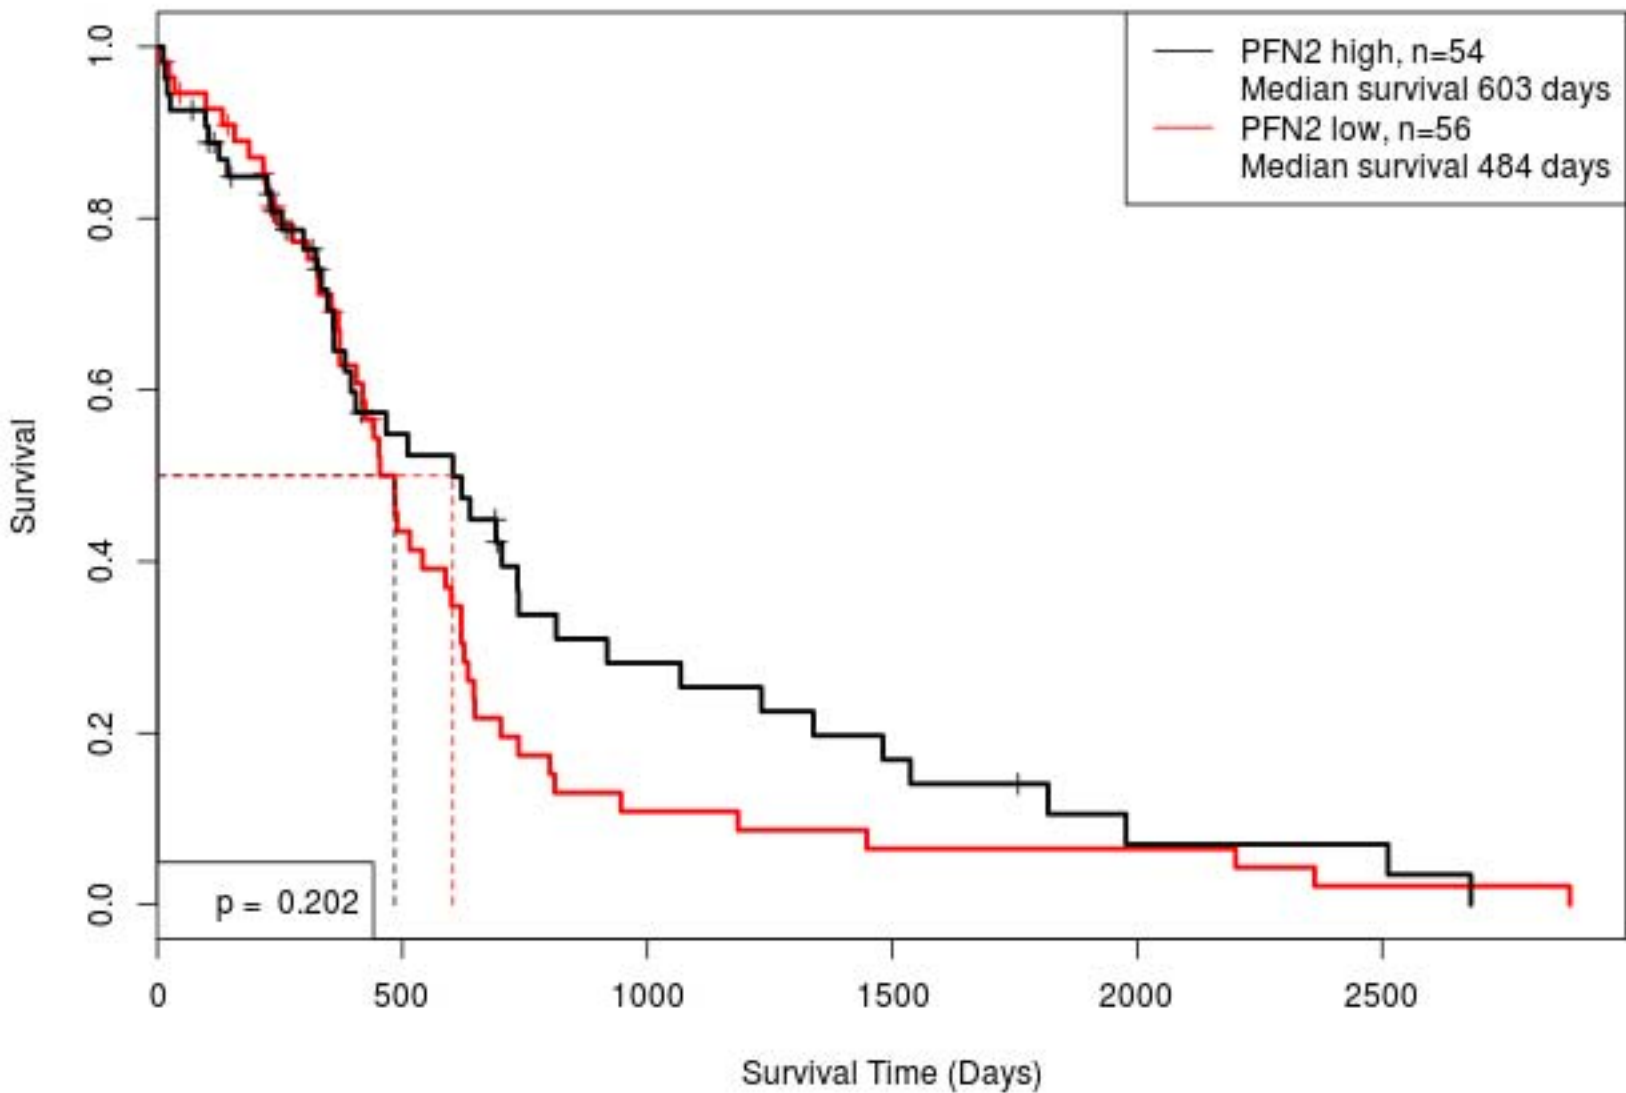



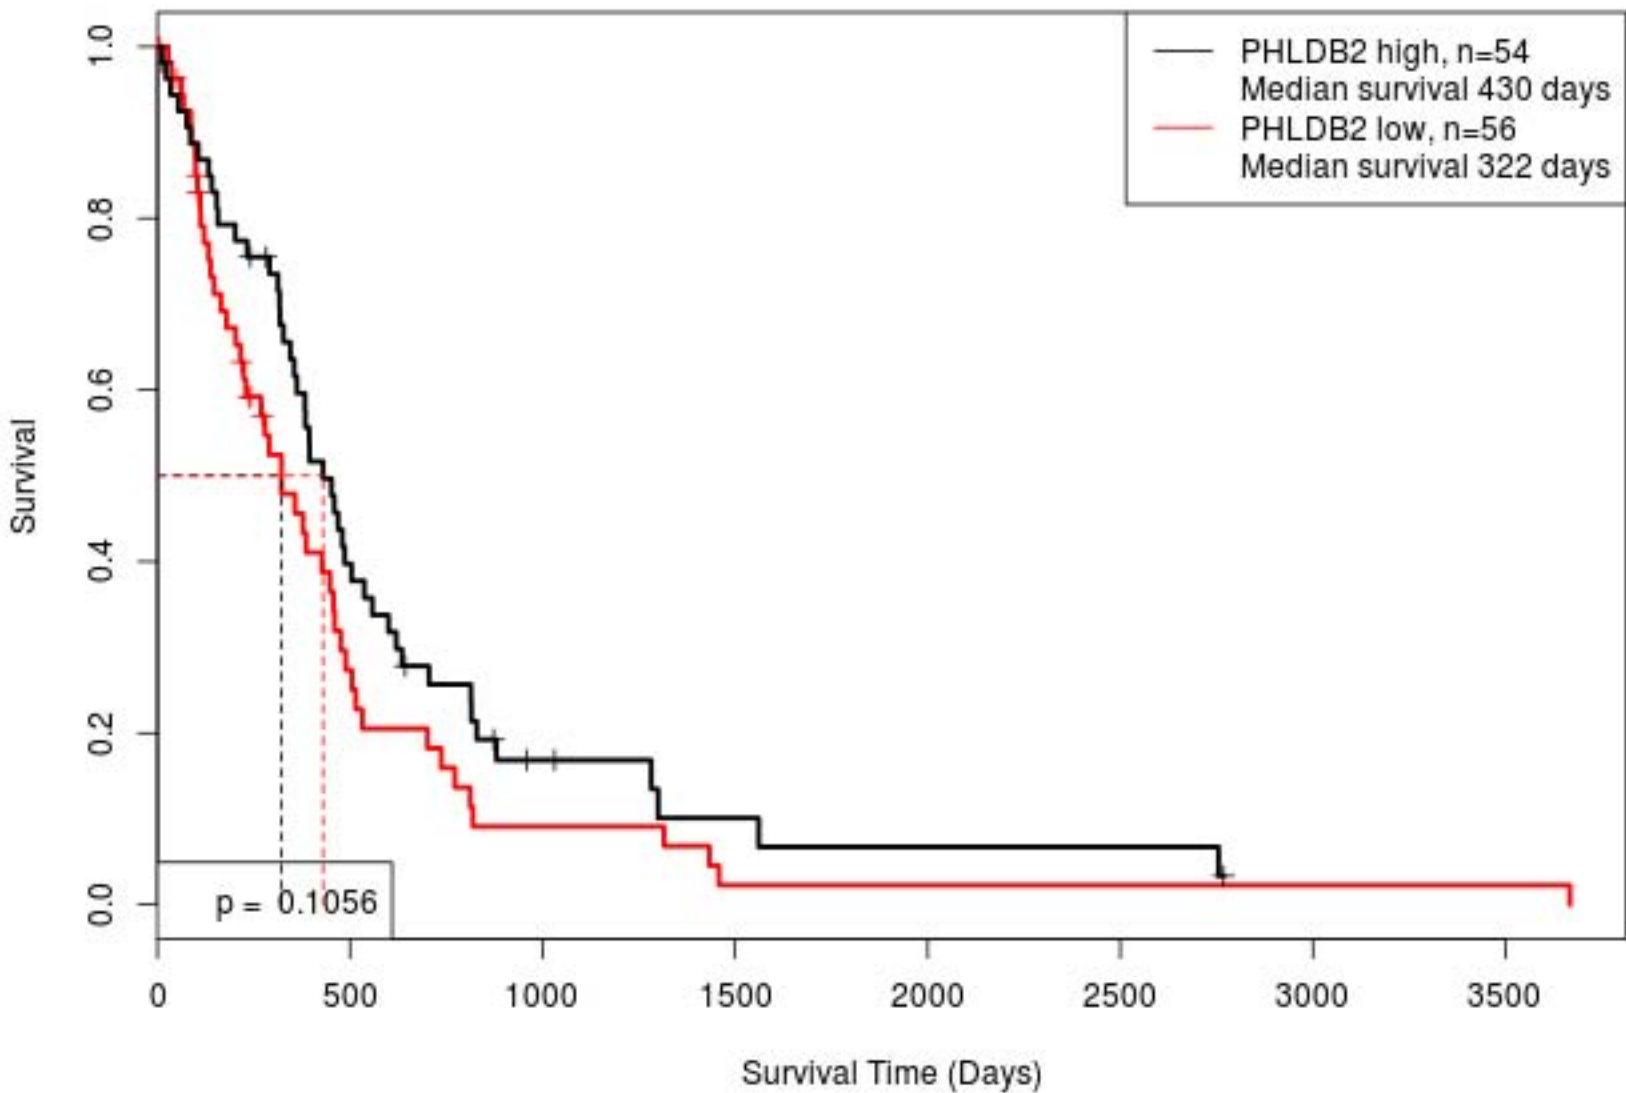

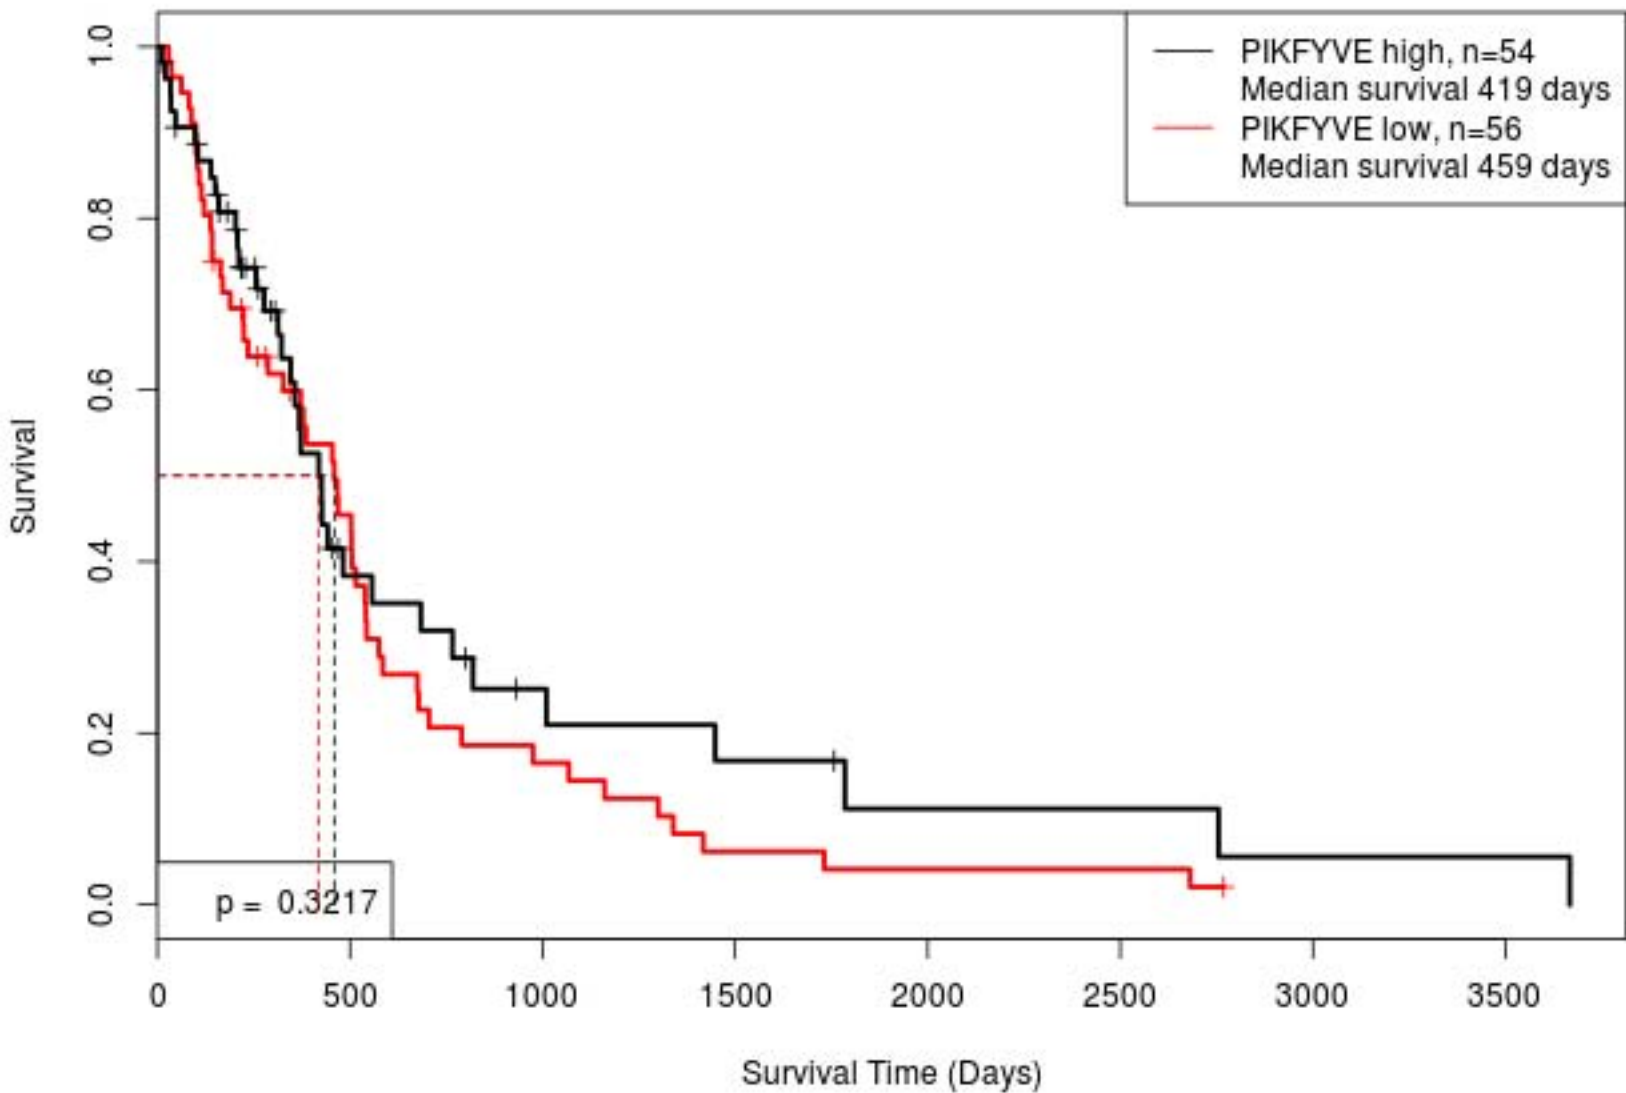

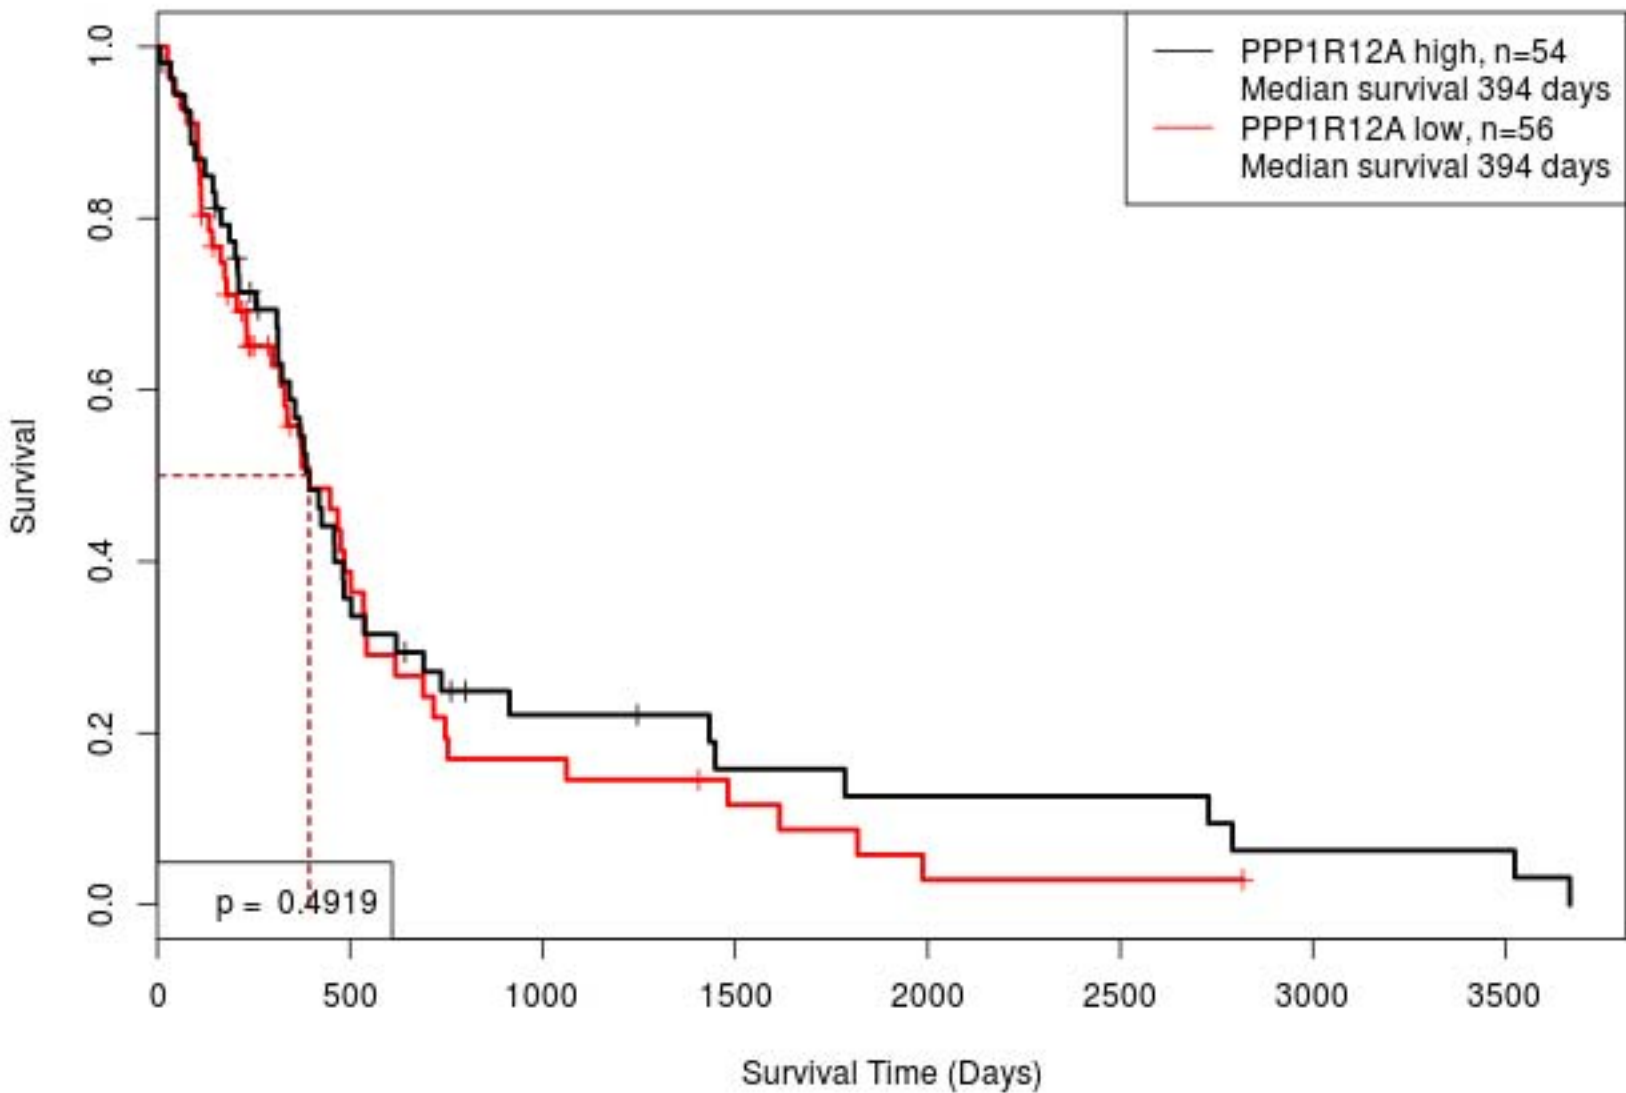

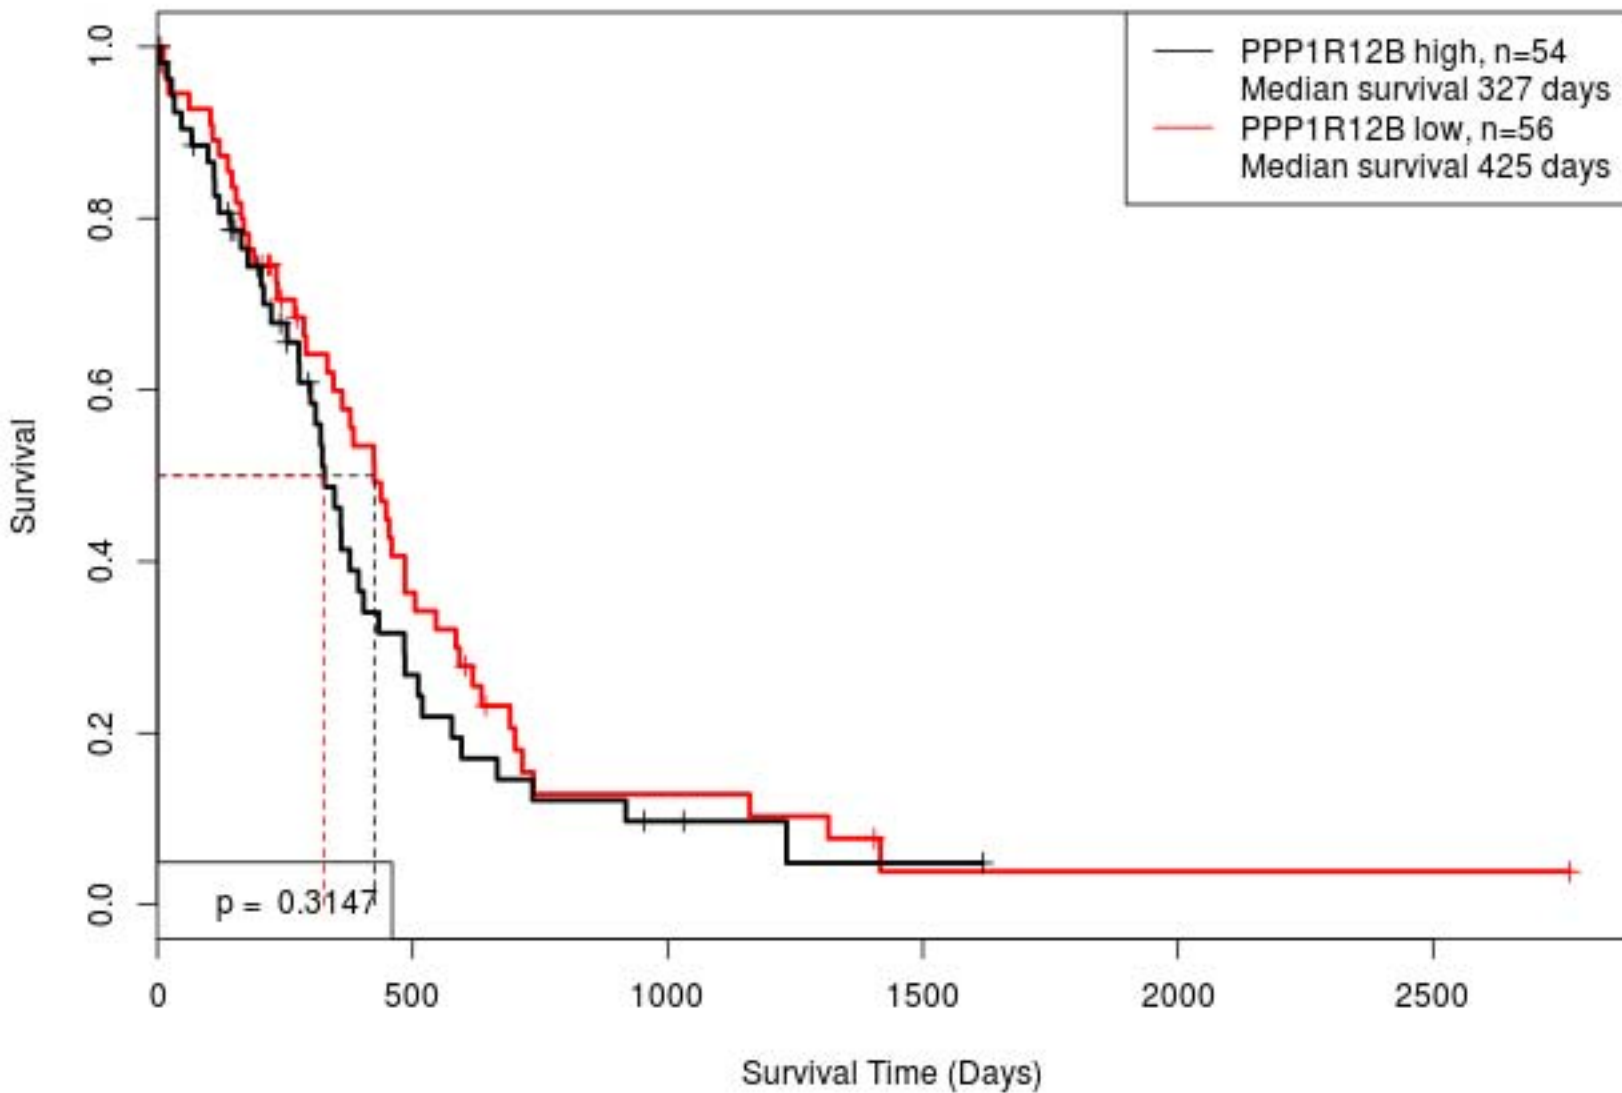

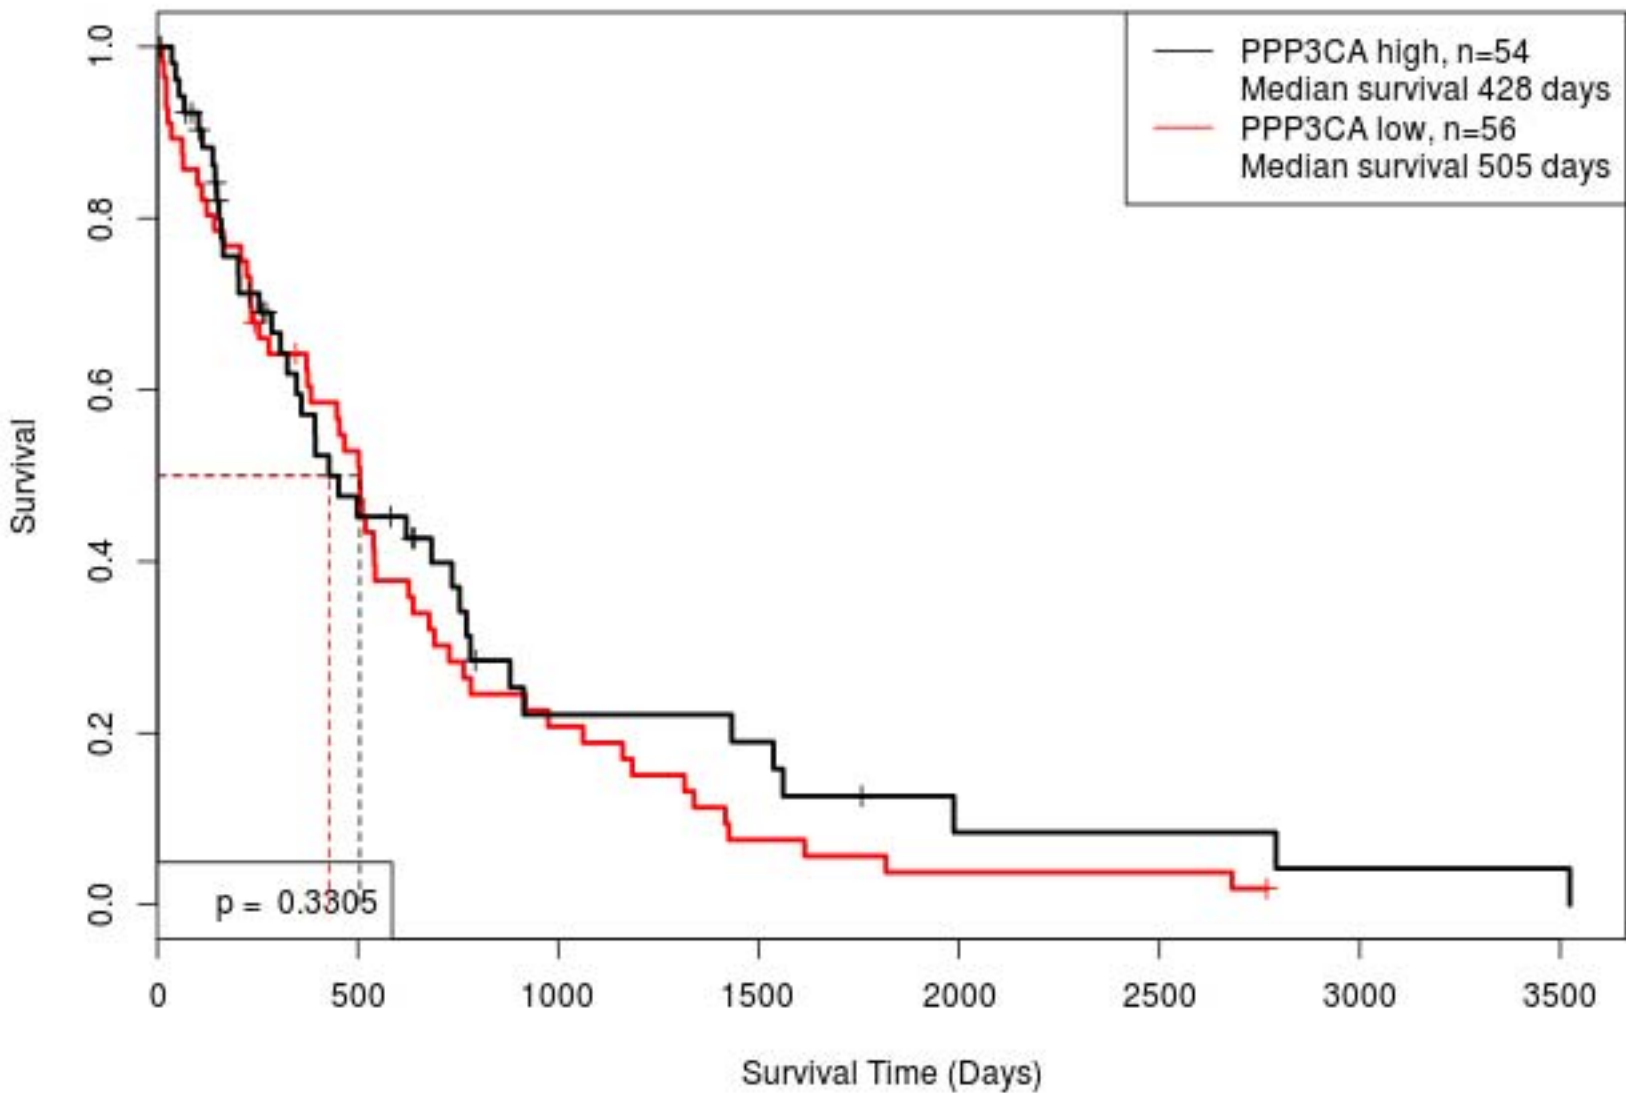

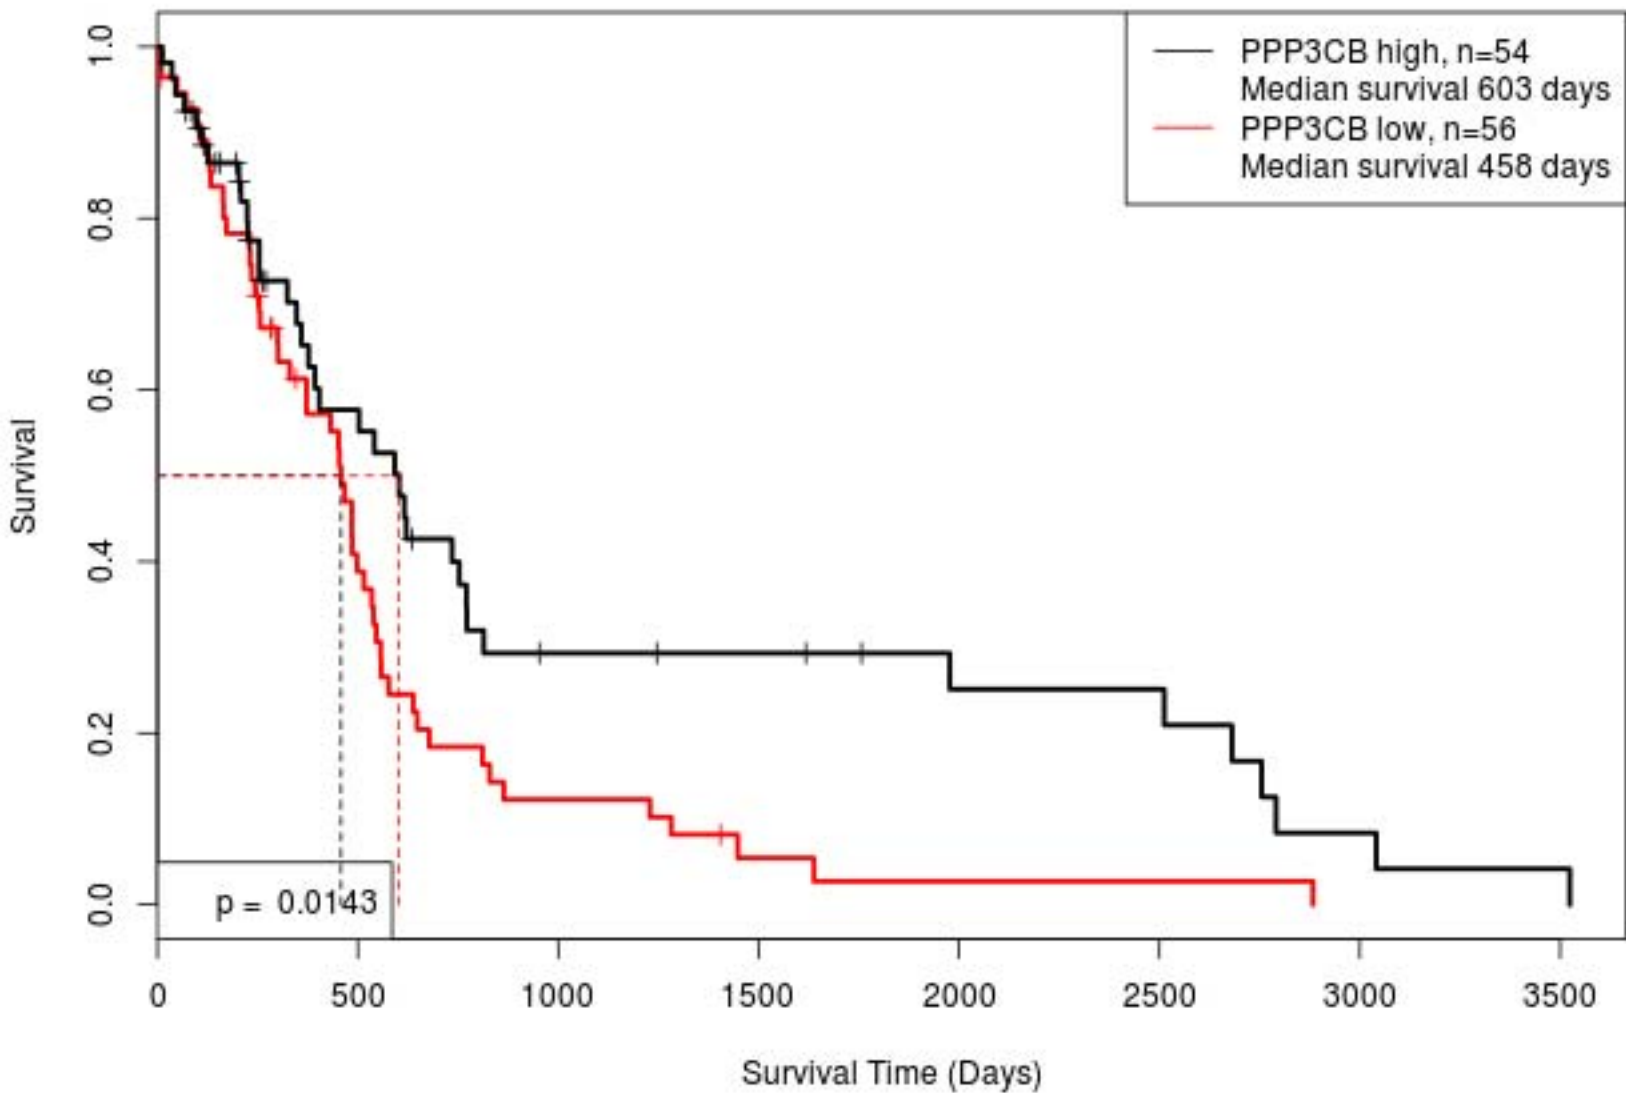

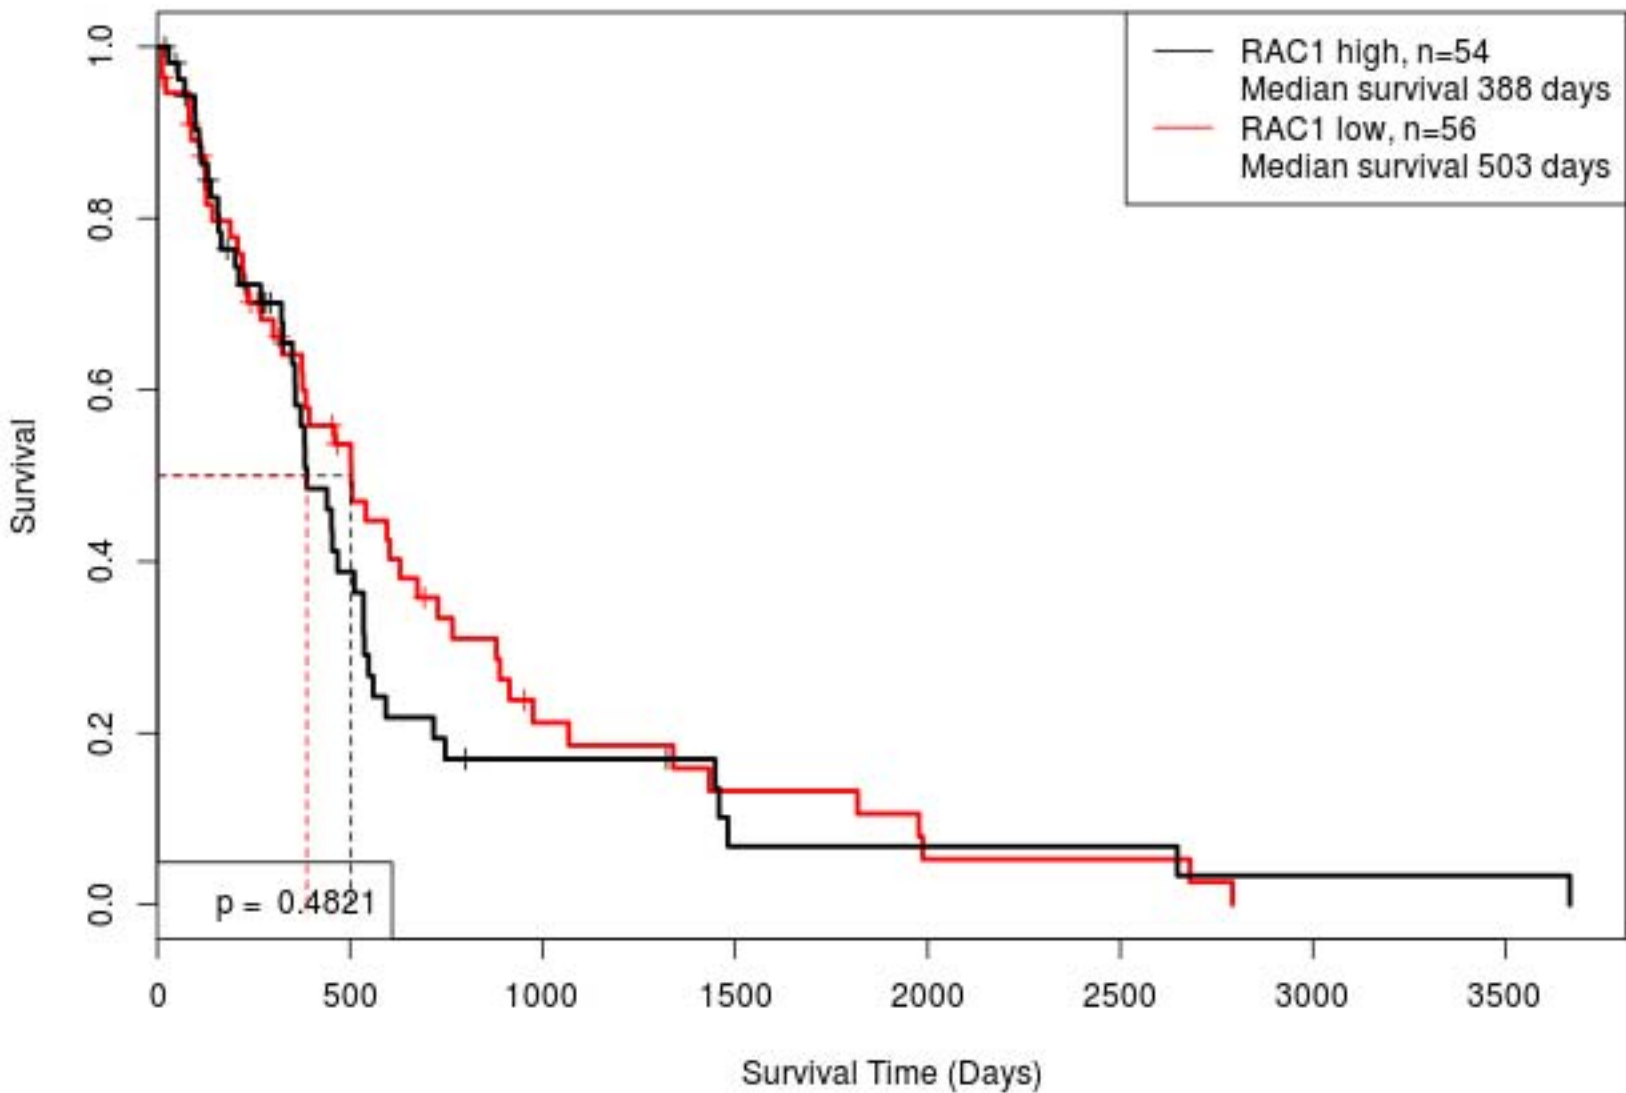

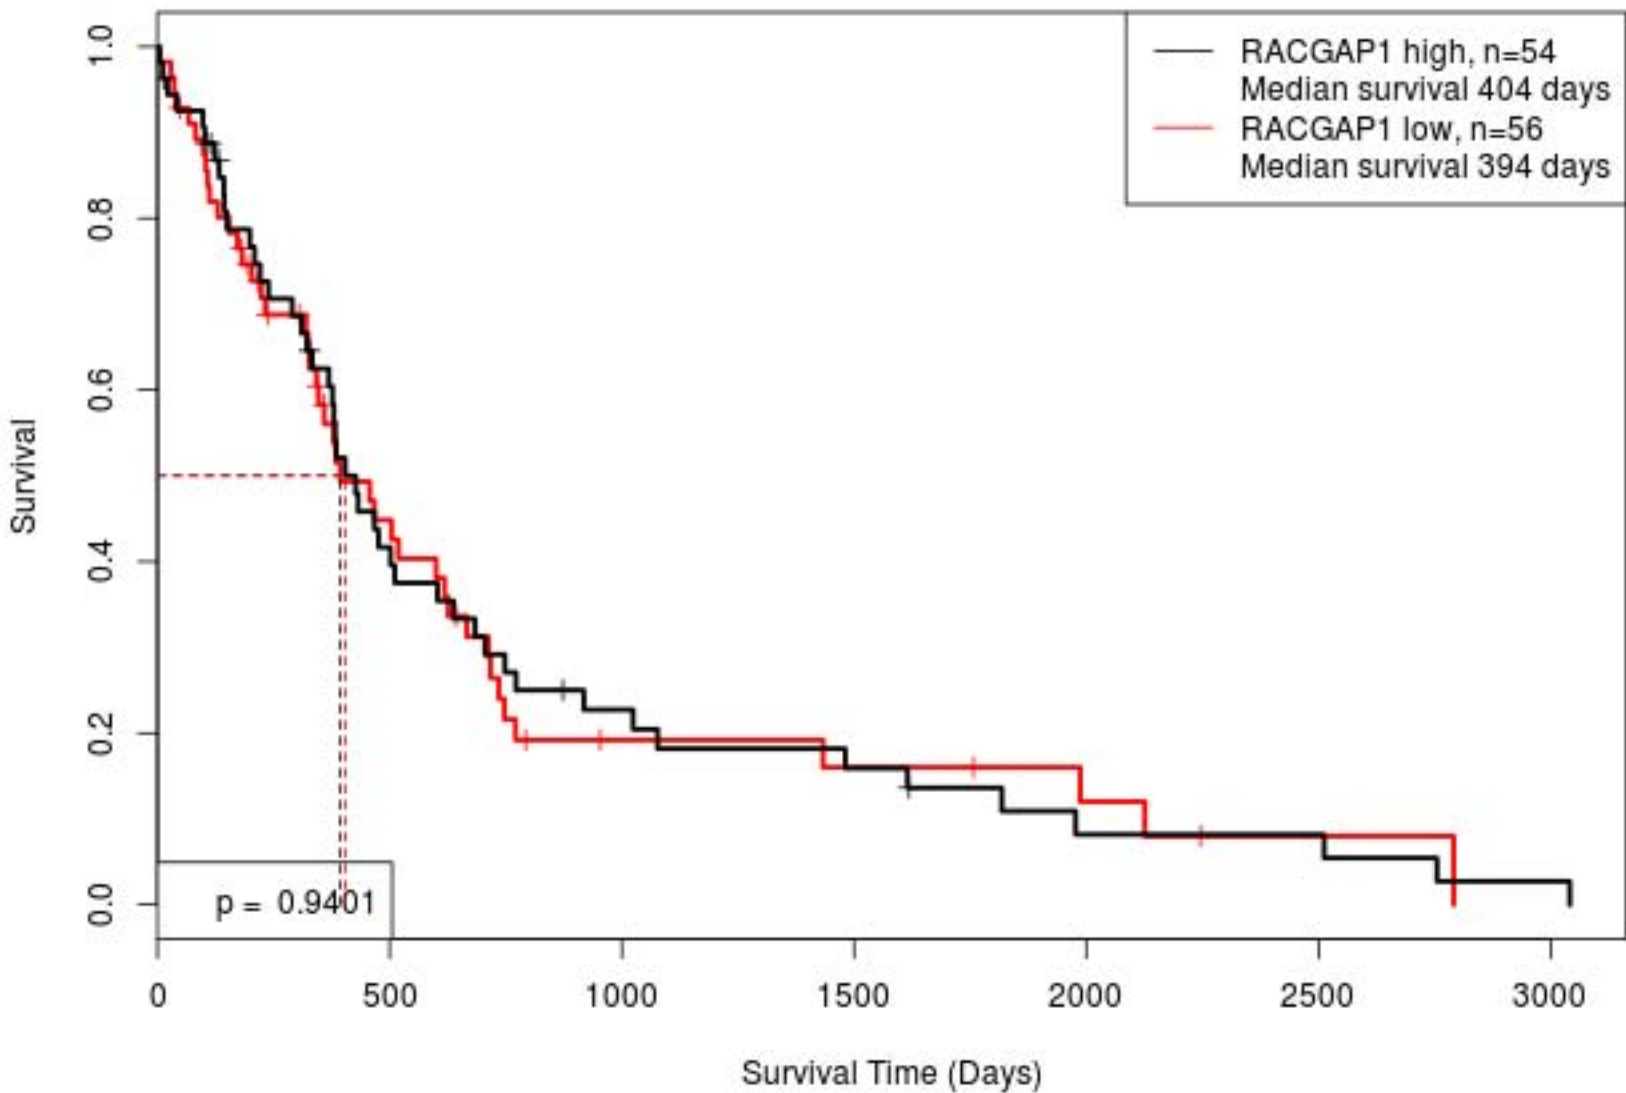



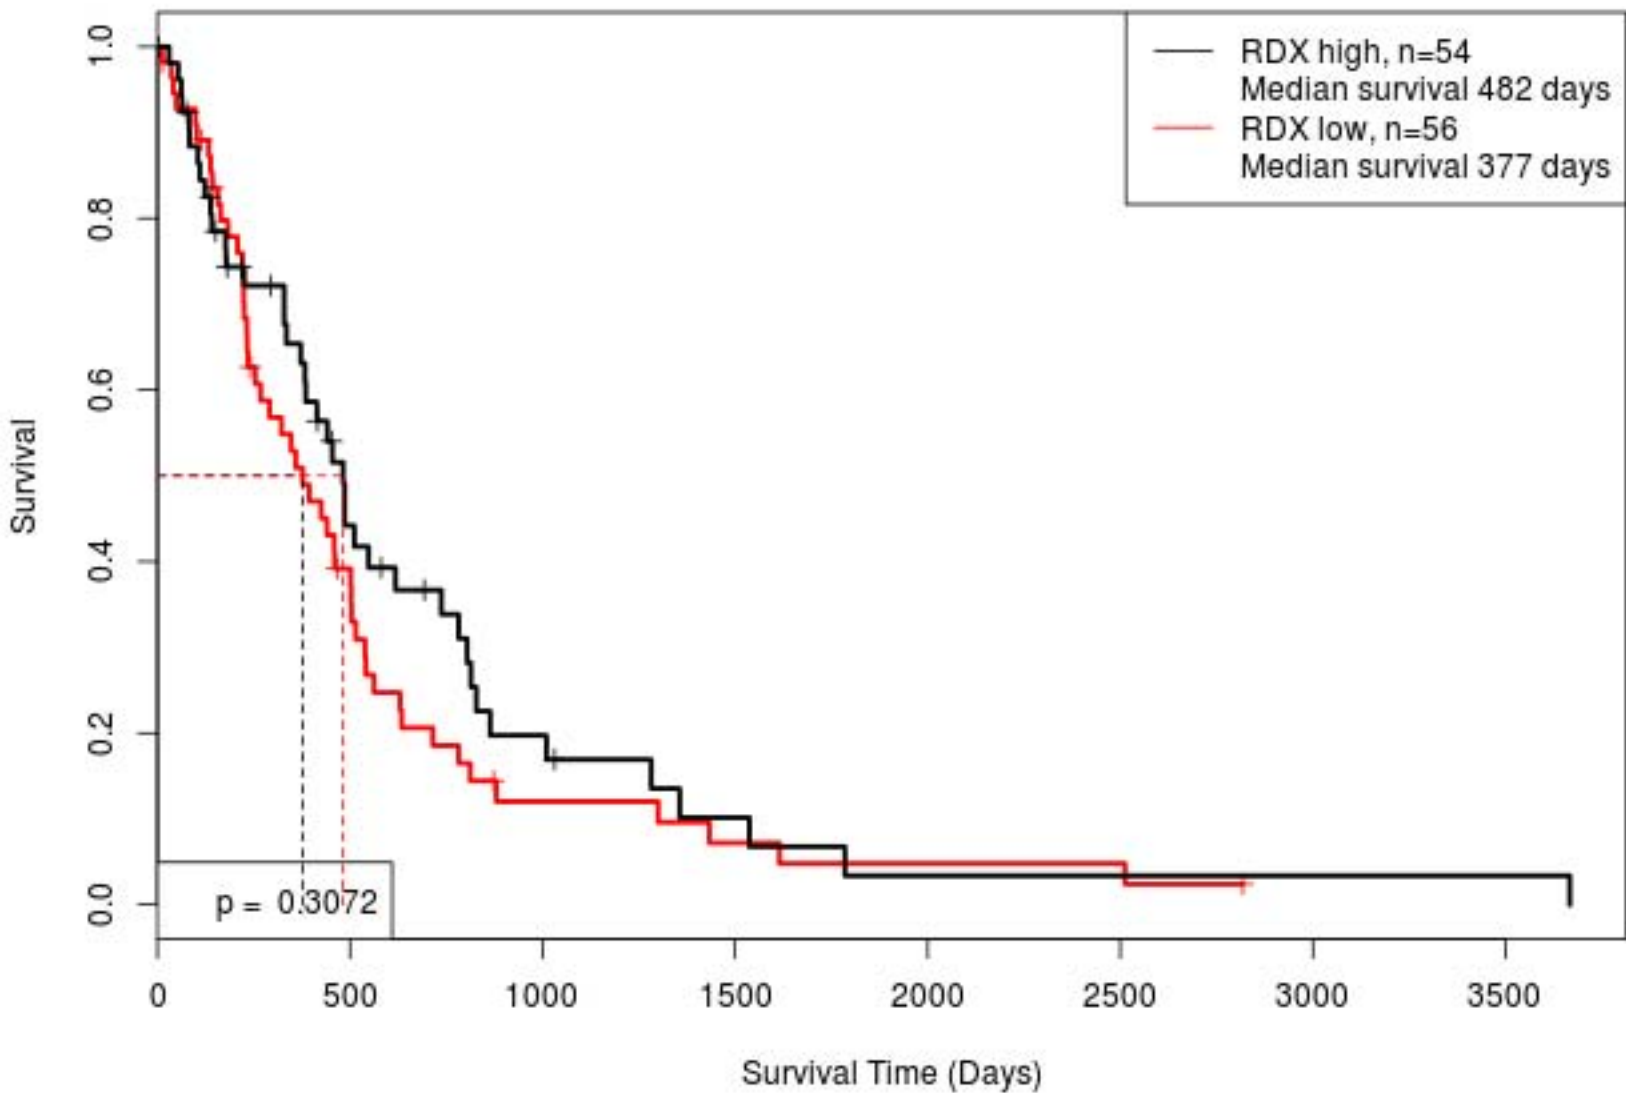

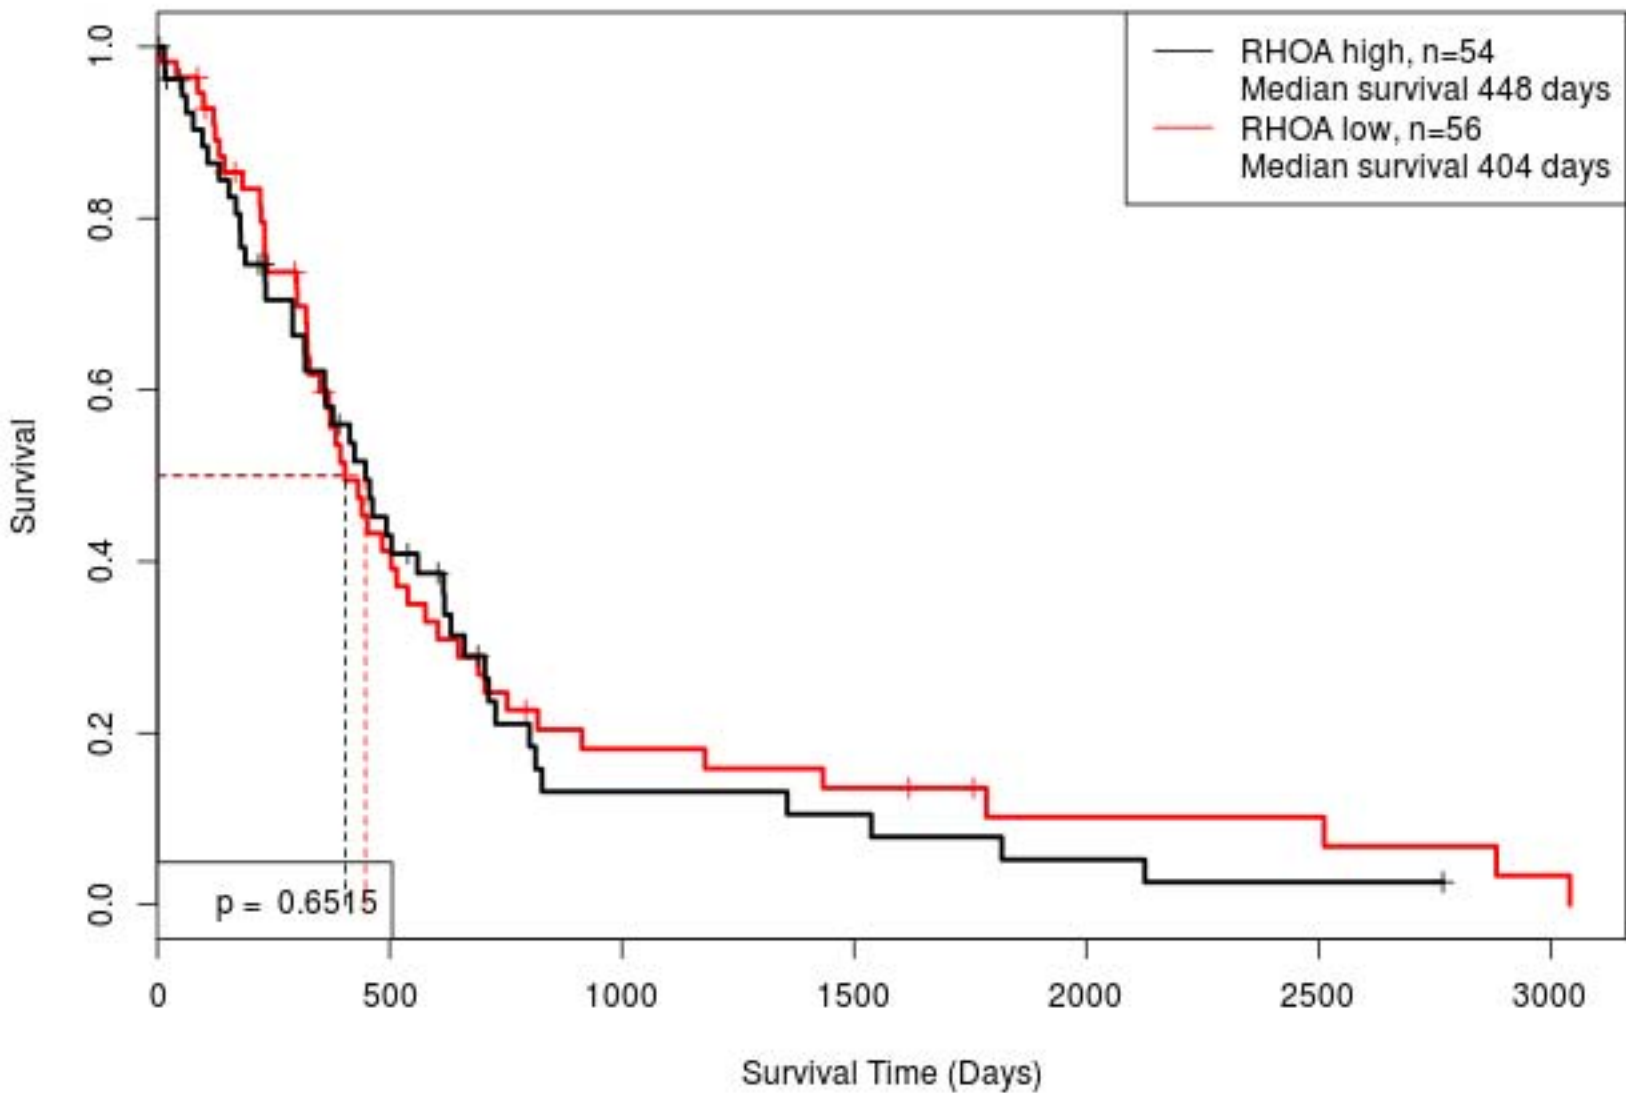

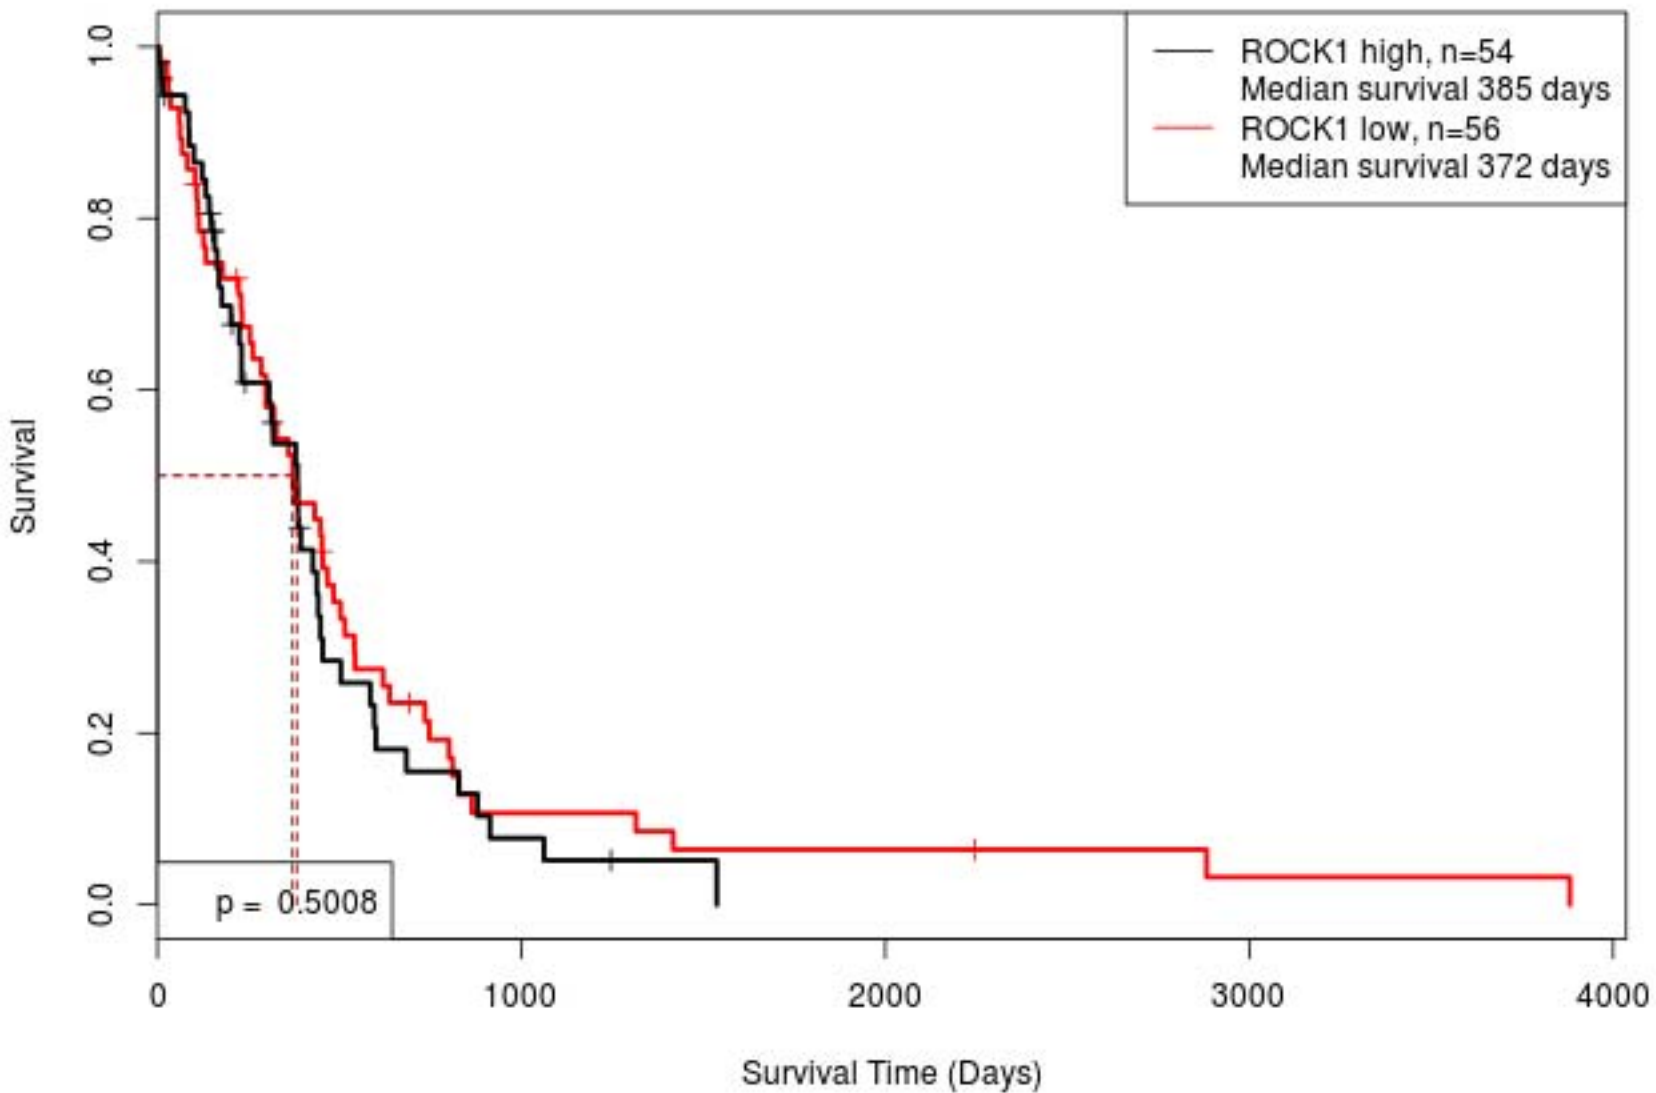

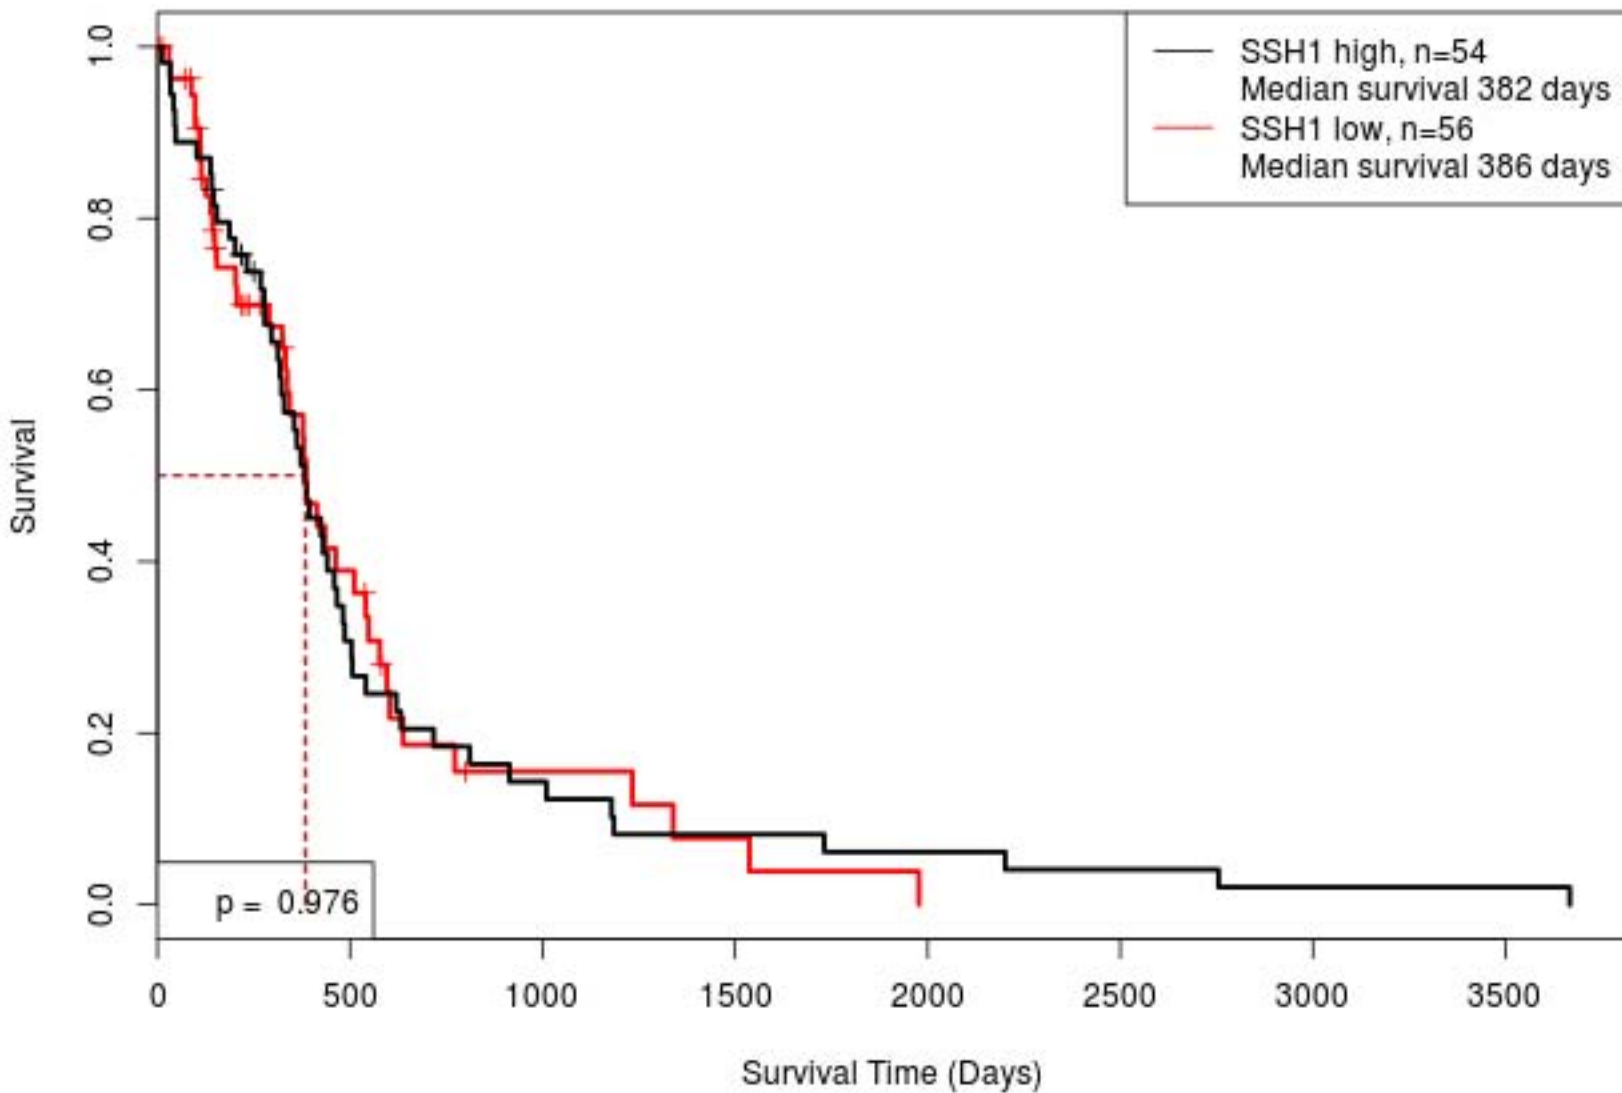

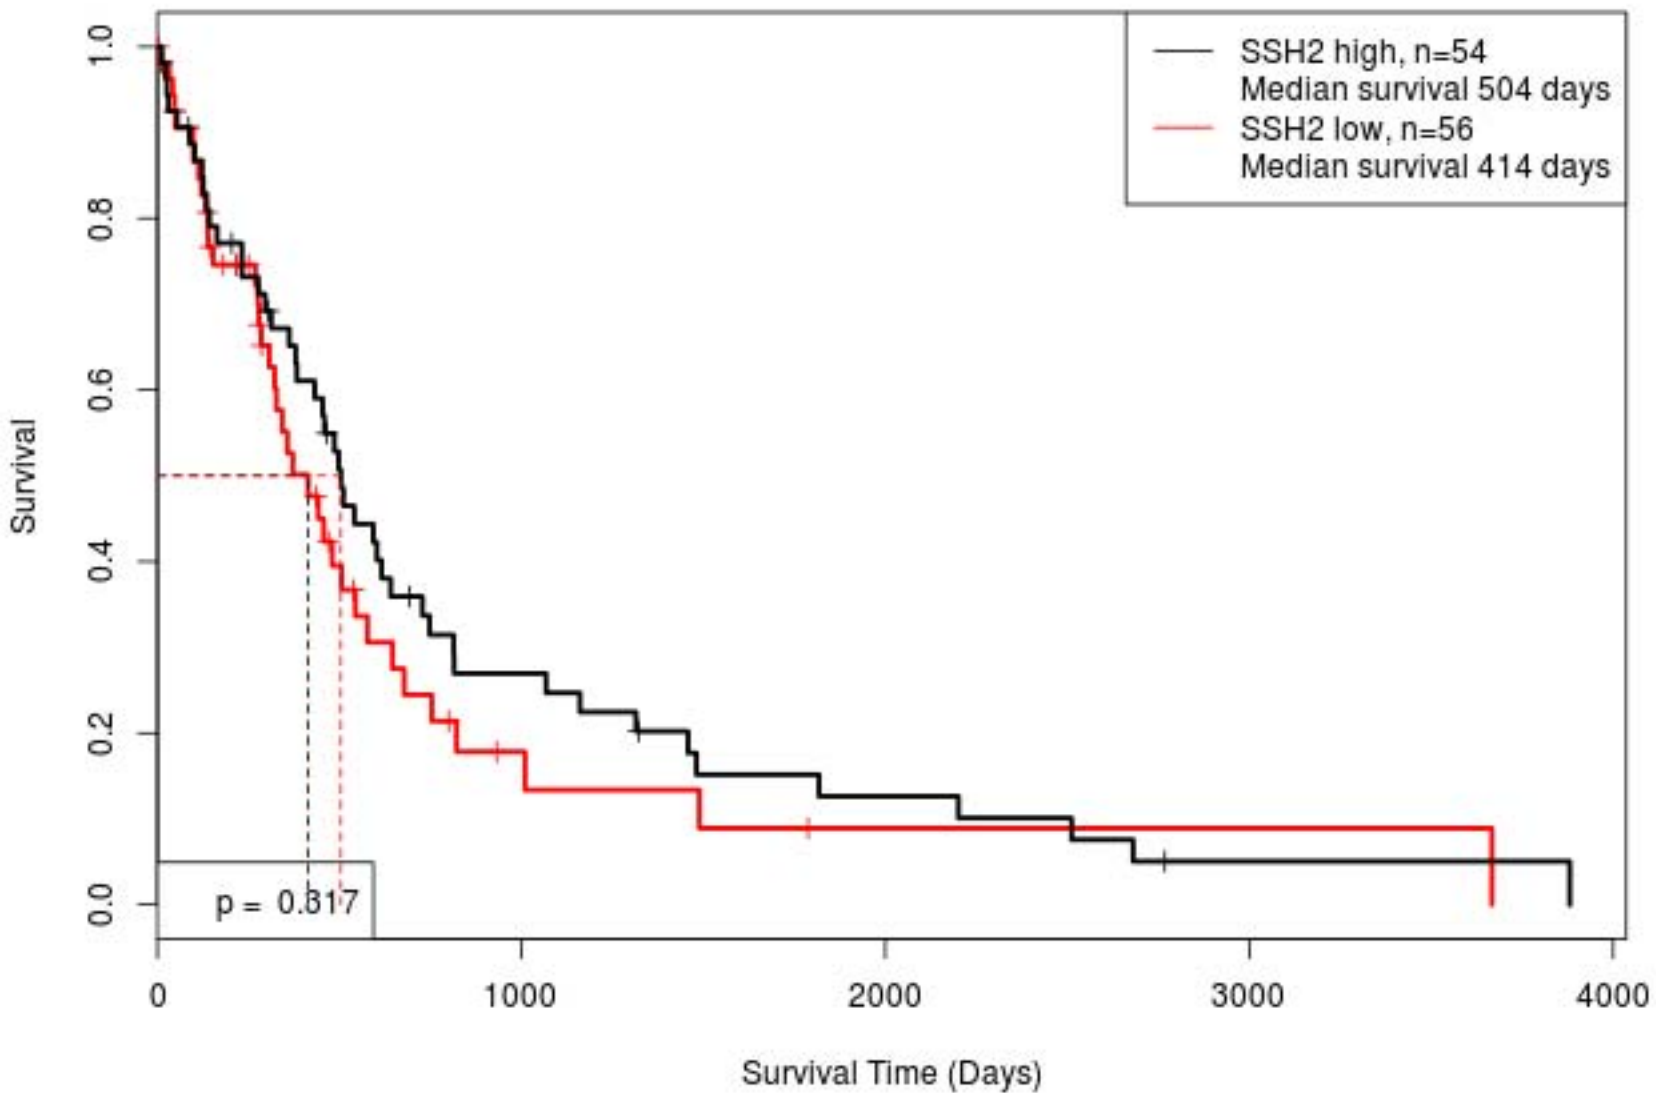

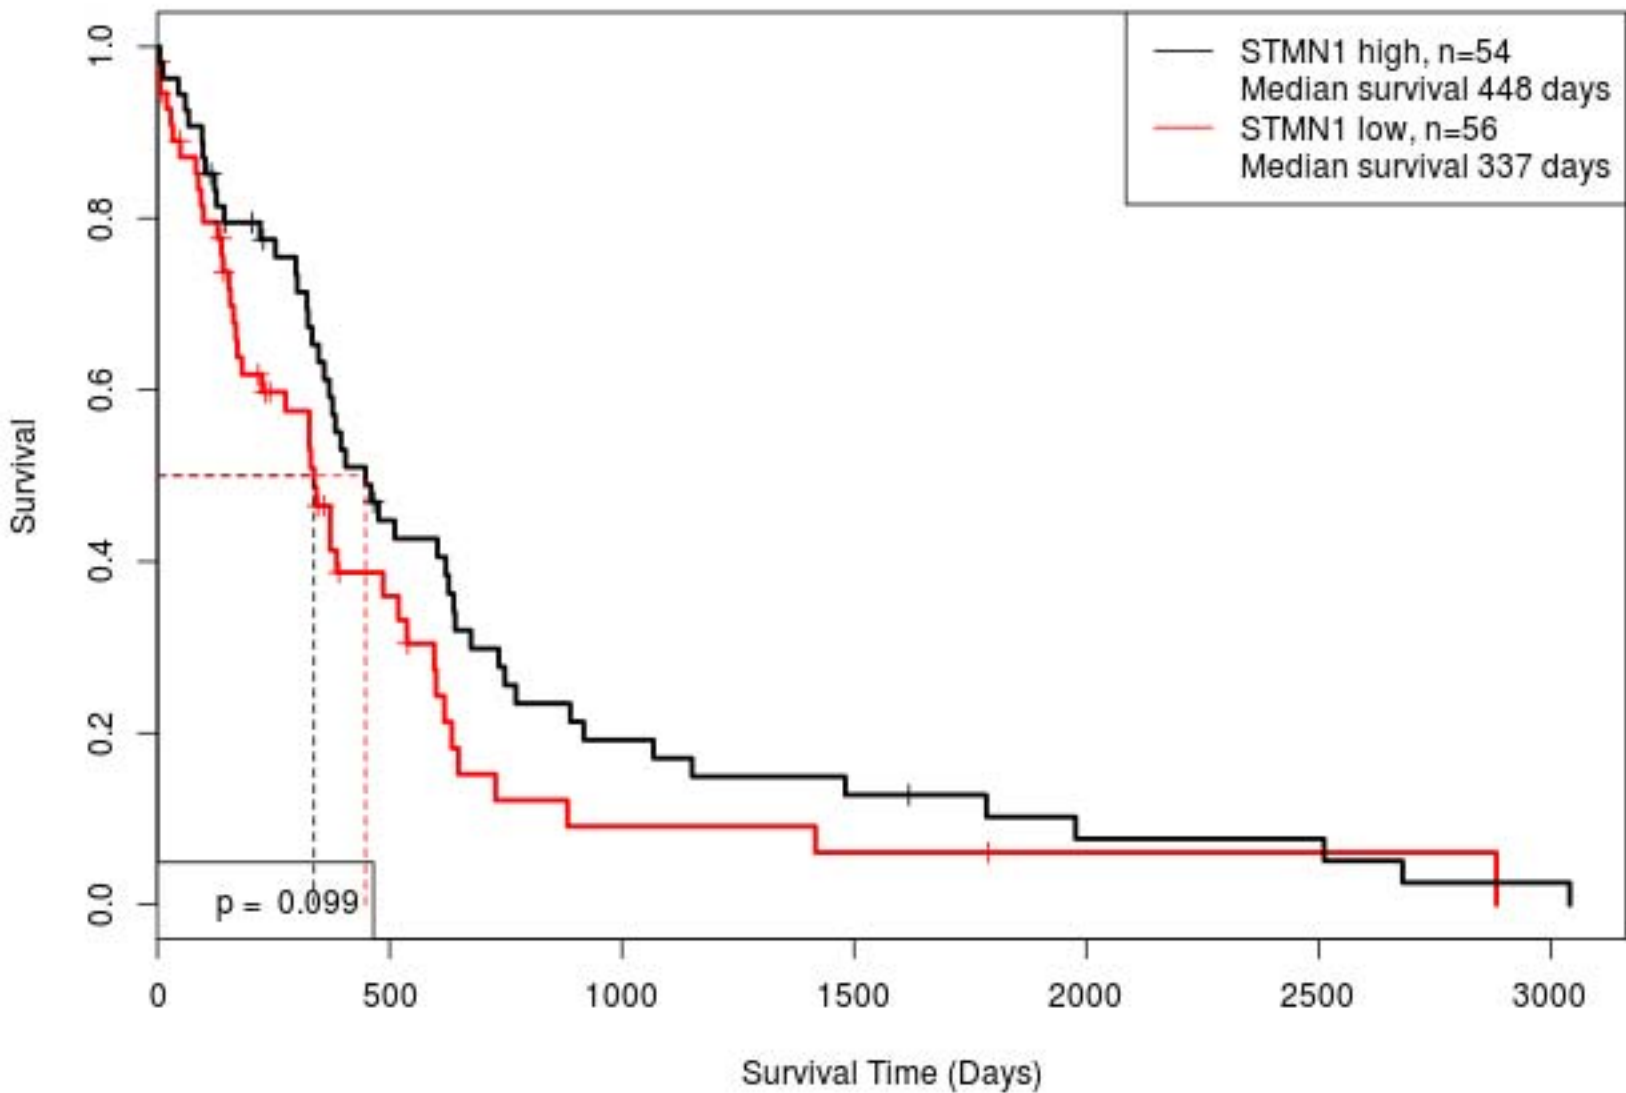

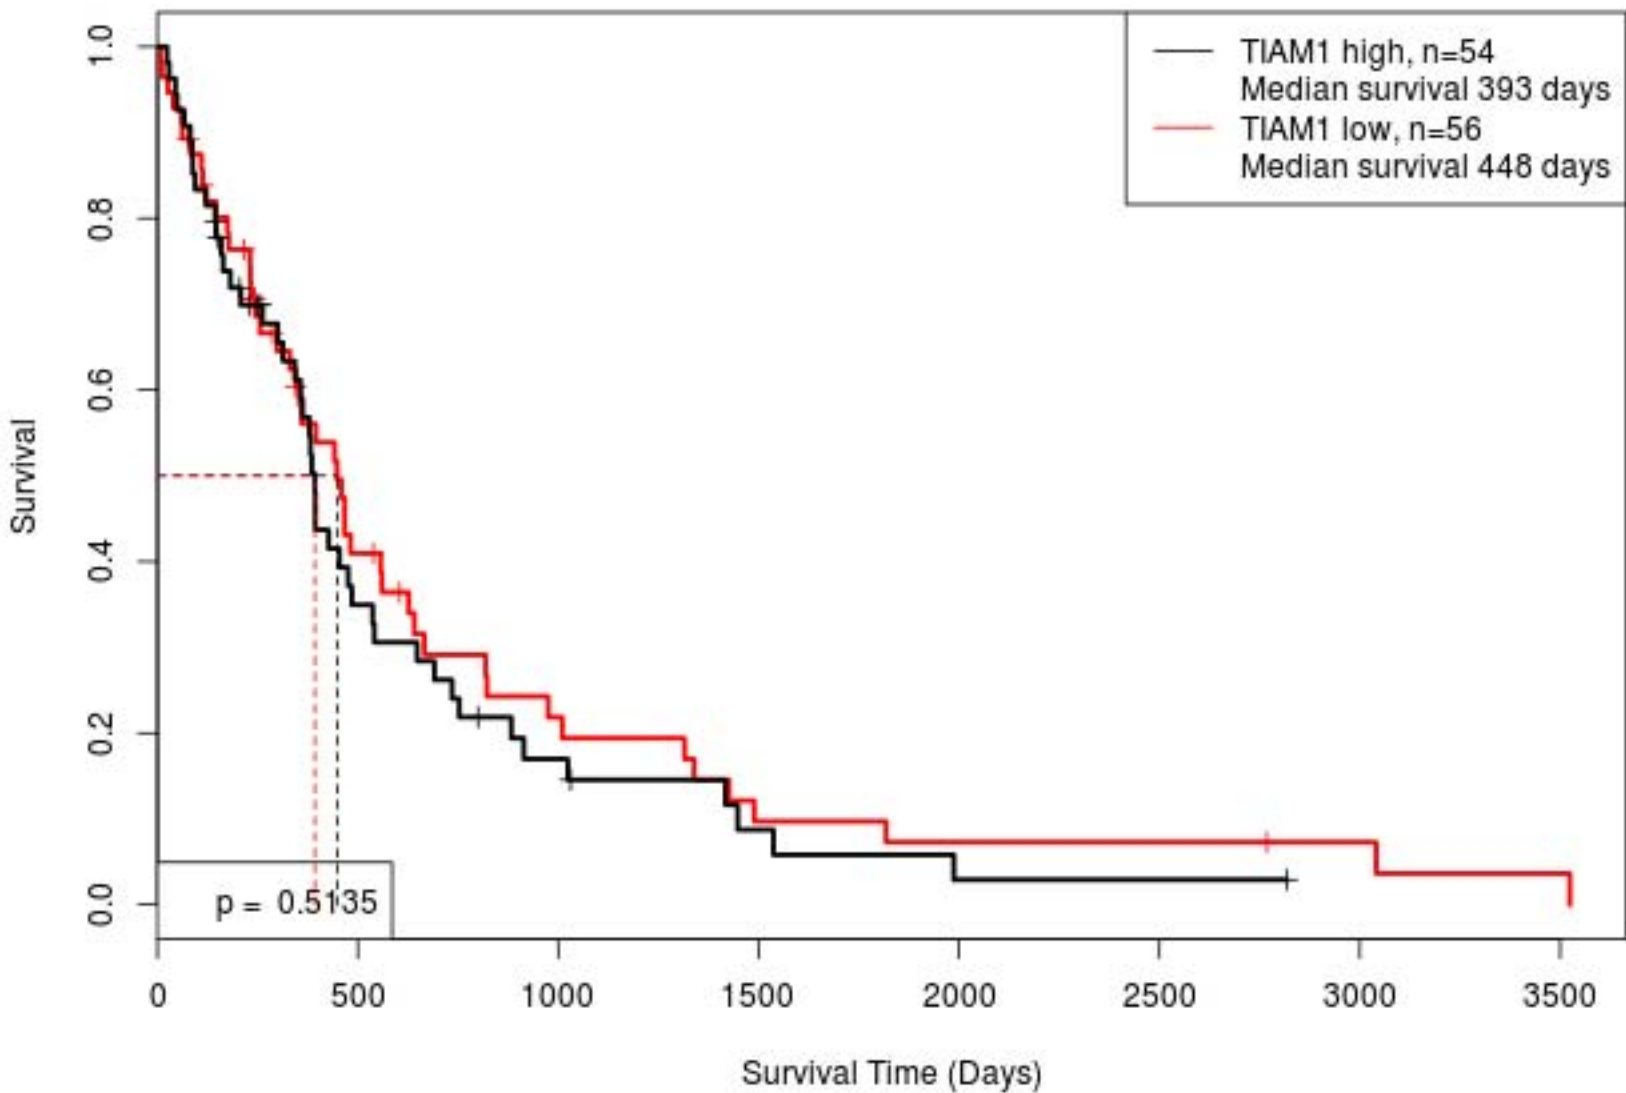

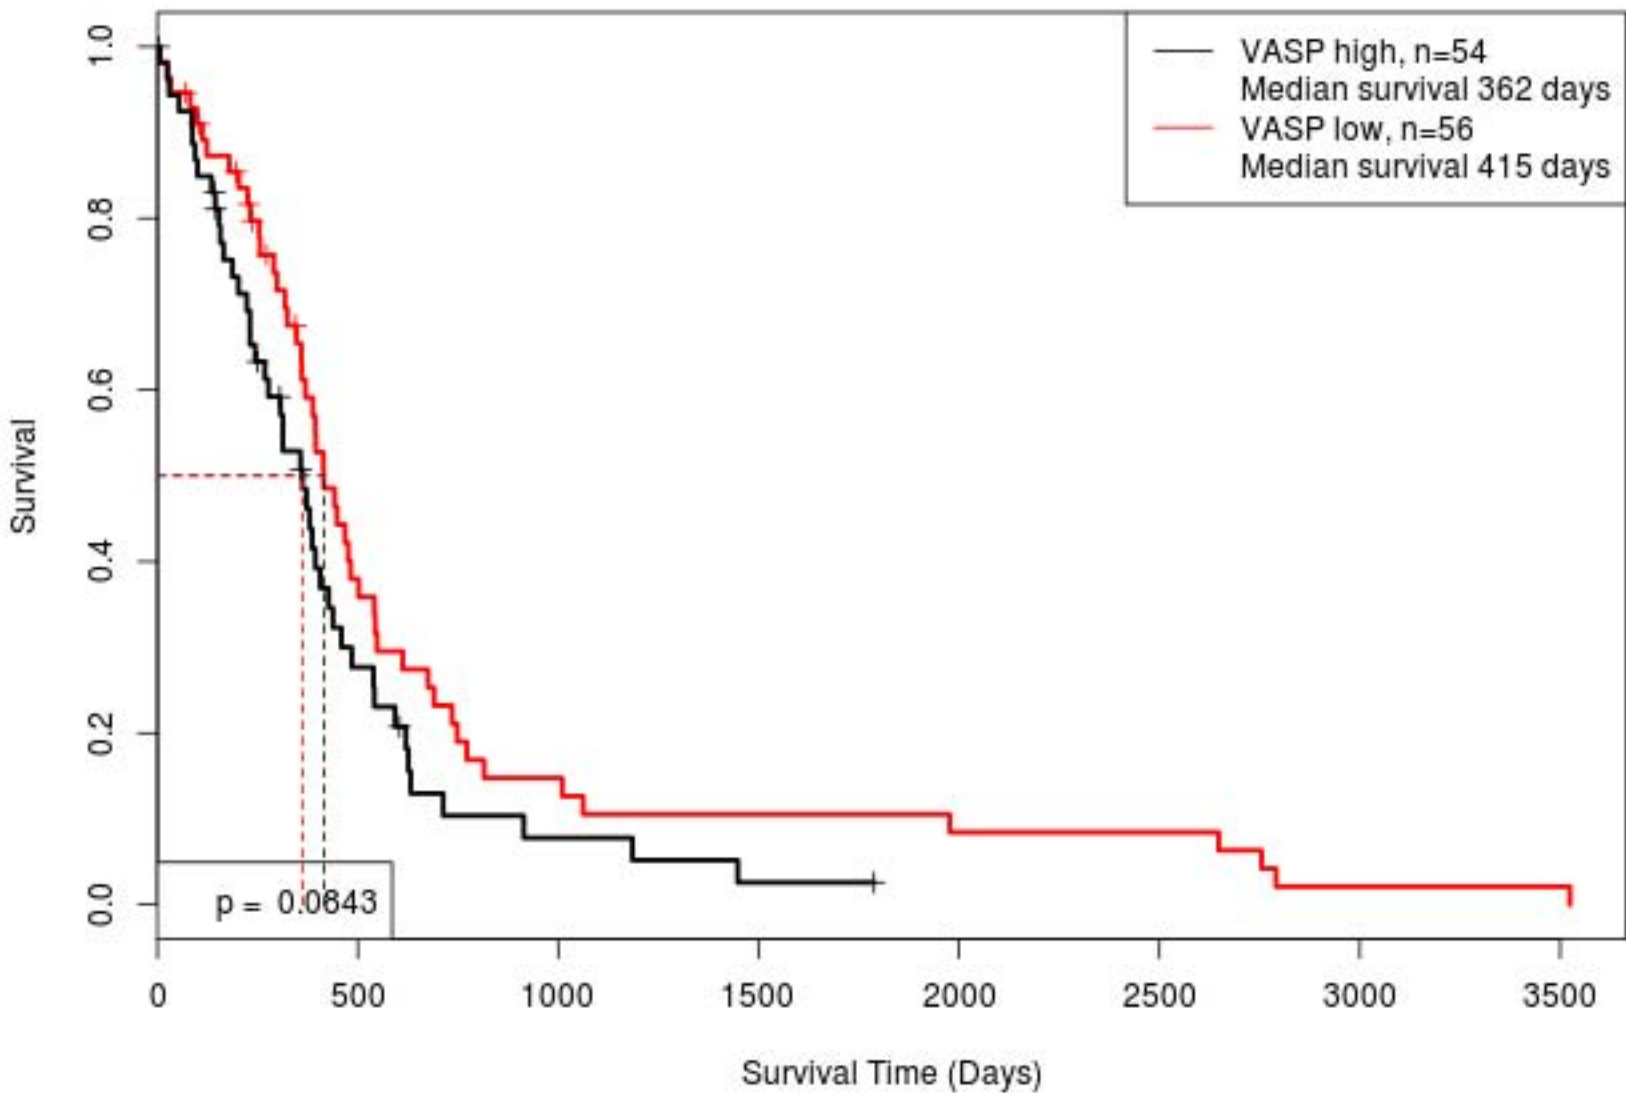



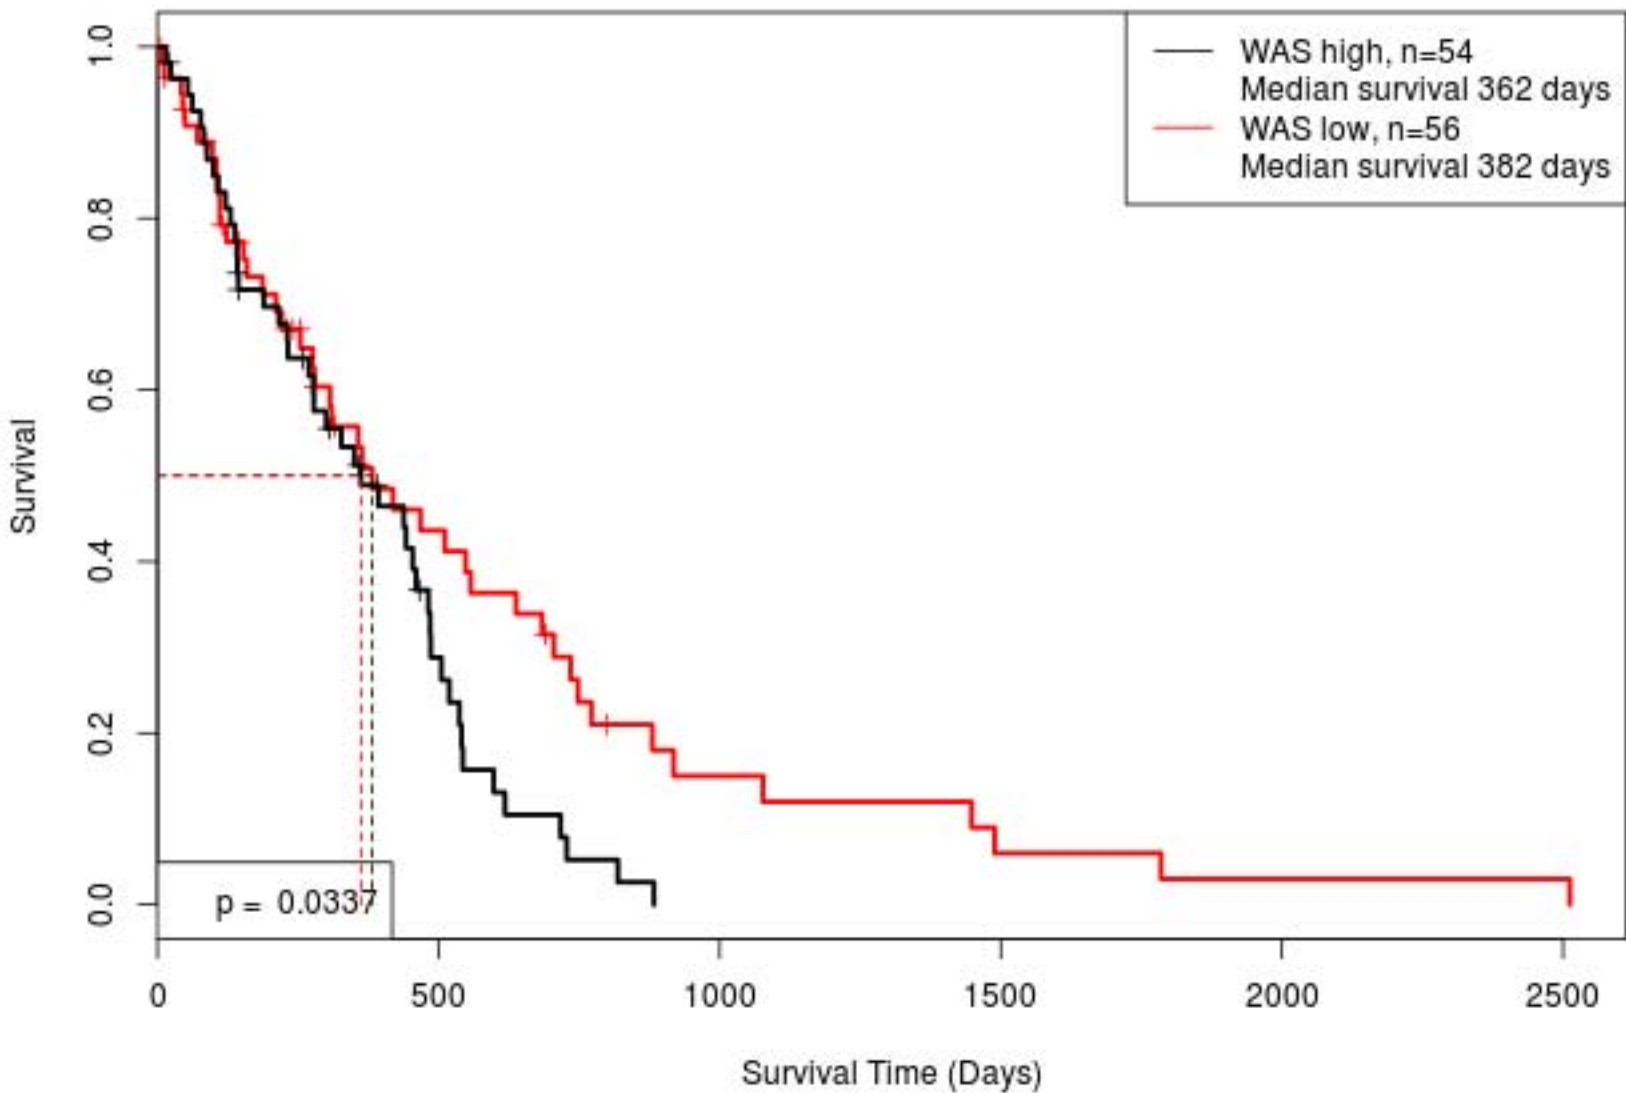

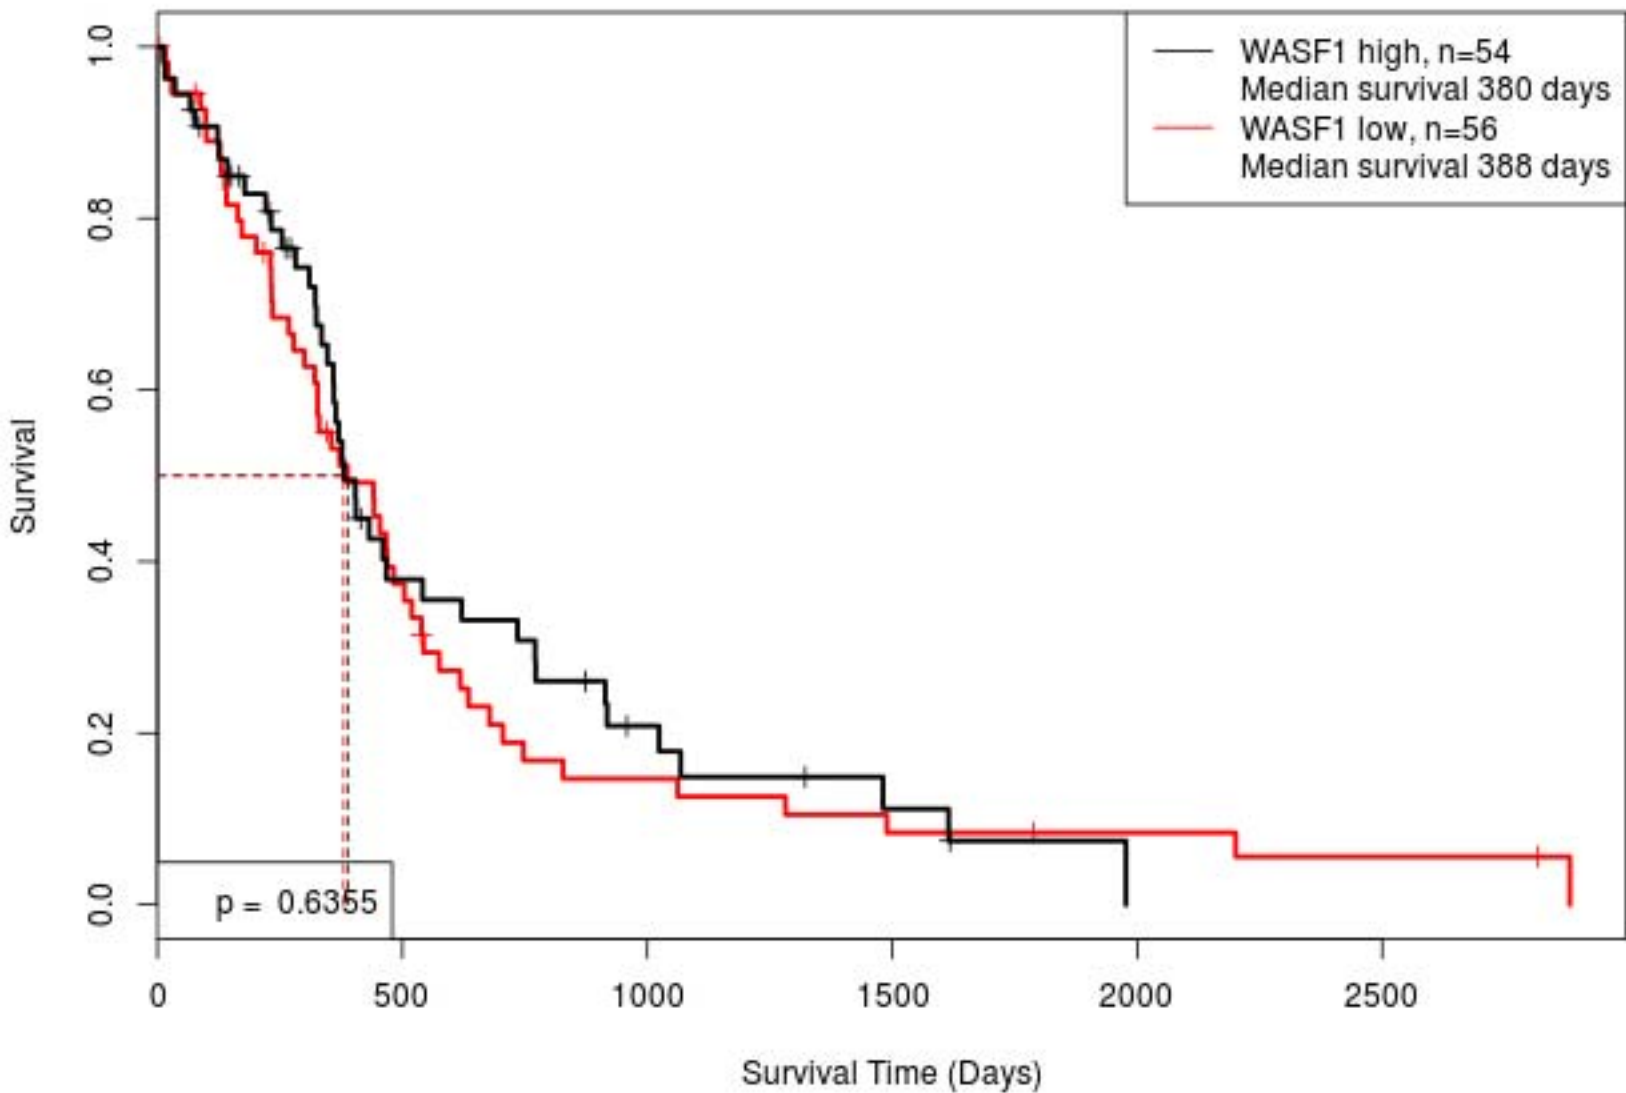

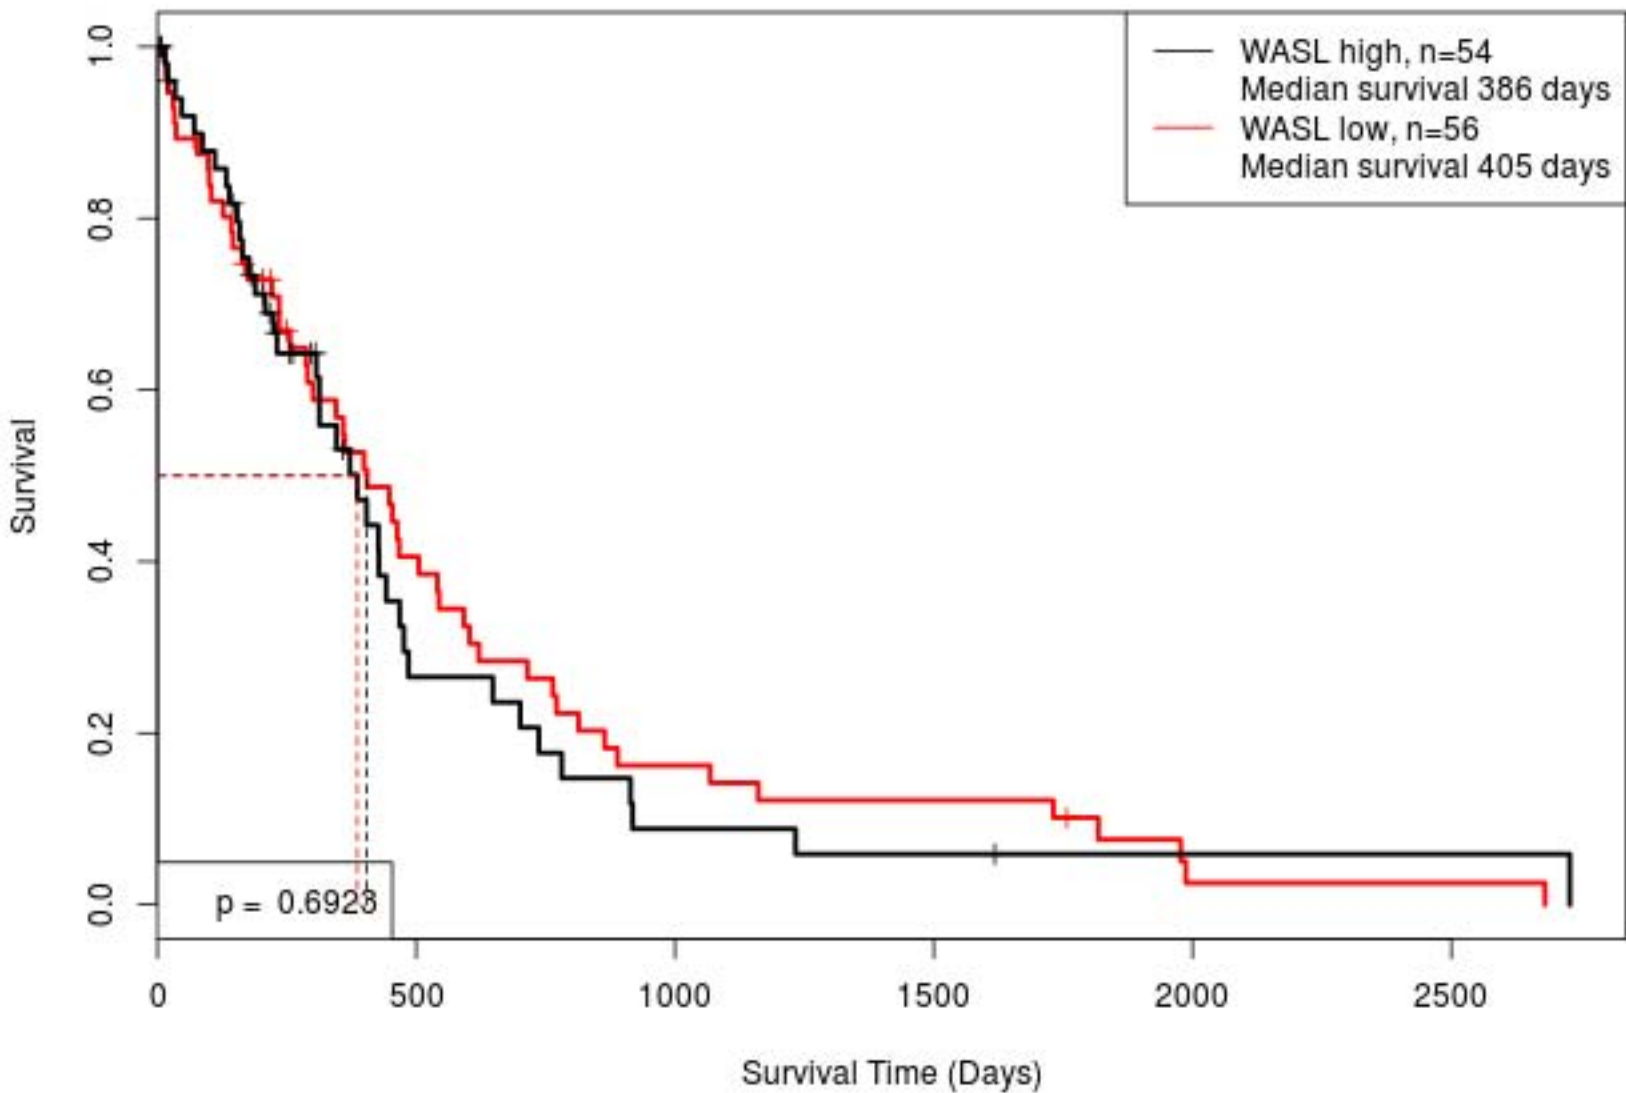

**Supplementary Figure 3.** Viability assay and immuno staining with anti-acetylated tubulin, phalloidin staining and DAPI staining of GBM cells exposed to sublethal concentration of temozolomide. Abbreviation: TMZ, temozolomide.

# Temozolomide Treatment and Cytoskeleton effect

2 Days

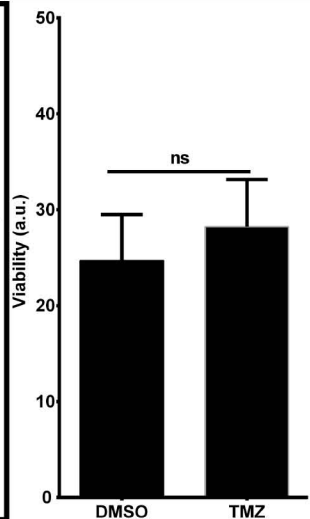

DMSO -2 Days

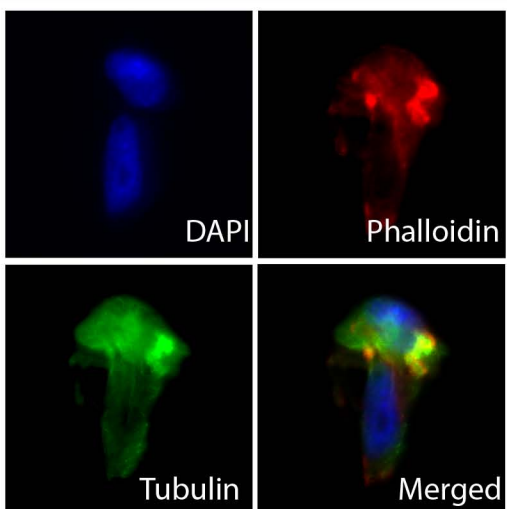

TMZ - 2 Days

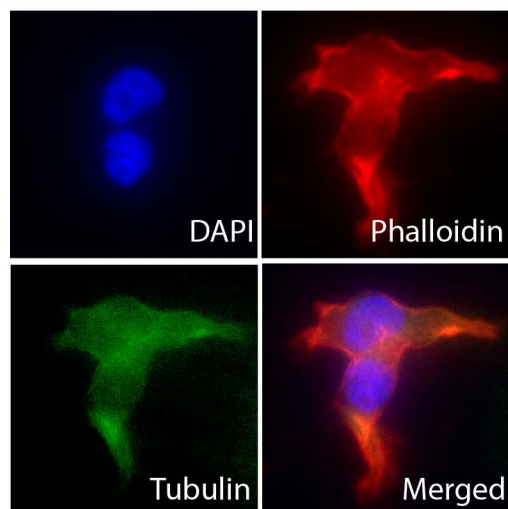

4 Days

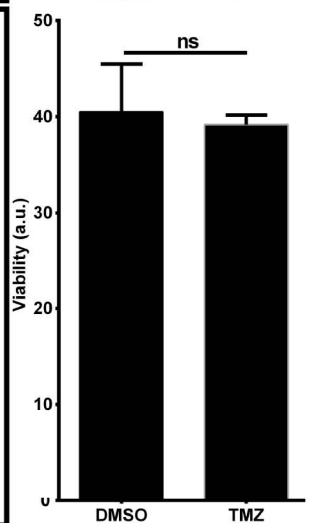

DMSO 4 Days

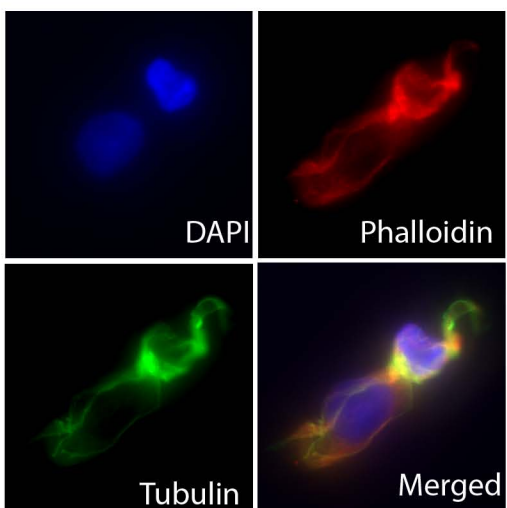

TMZ - 4 Days

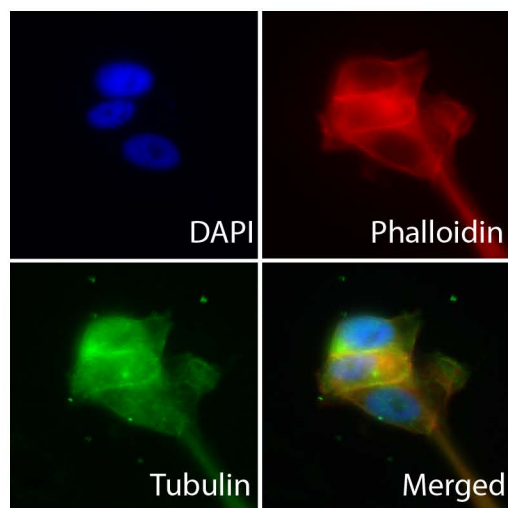

**Supplementary Table 1.** Gene list with fold change values and statistics (p-value) for all the datasets analysed here.

**Supplementary Table 1 showing Groups, Gene name and values for dataset used in Figure 1**

| Group           | Subgroup                                                                          | Gene                                                   | Gene Name                                                                               | Fold change (Tumor vs Normal)                       | p-paired (Tumor vs Normal)                                |                                         |              |             |
|-----------------|-----------------------------------------------------------------------------------|--------------------------------------------------------|-----------------------------------------------------------------------------------------|-----------------------------------------------------|-----------------------------------------------------------|-----------------------------------------|--------------|-------------|
| Actin Filaments | IP                                                                                | ACTR2                                                  | ARP2 actin-related protein 2 homolog (yeast)                                            | -1,073835449                                        | 0,455483458                                               |                                         |              |             |
|                 |                                                                                   | ACTR3                                                  | ARP3 actin-related protein 3 homolog (yeast)                                            | 1,504270418                                         | 0,0009155                                                 |                                         |              |             |
|                 |                                                                                   | ARPC1B                                                 | Actin Related Protein 2/3 Complex, Subunit 1B                                           | 2,906922396                                         | 0,001863115                                               |                                         |              |             |
|                 |                                                                                   | ARPC2                                                  | actin related protein 2/3 complex, subunit 2. 34kDa                                     | 1,079396338                                         | 0,176365232                                               |                                         |              |             |
|                 |                                                                                   | ARPC3                                                  | actin related protein 2/3 complex, subunit 3. 21kDa                                     | -1,044050354                                        | 0,643502179                                               |                                         |              |             |
|                 |                                                                                   | ARPC4                                                  | actin related protein 2/3 complex, subunit 4. 20kDa                                     | 1,259909509                                         | 0,046854047                                               |                                         |              |             |
|                 |                                                                                   | ARPC5                                                  | actin related protein 2/3 complex, subunit 5. 16kDa                                     | 1,409263608                                         | 0,00497167                                                |                                         |              |             |
|                 |                                                                                   | CALD1                                                  | Caldesmon 1                                                                             | 3,205977129                                         | 1,40935E-05                                               |                                         |              |             |
|                 |                                                                                   | CDC42EP3                                               | CDC42 Effector Protein (Rho GTPase Binding) 3                                           | -1,453285561                                        | 0,008479265                                               |                                         |              |             |
|                 |                                                                                   | CFL1                                                   | cofilin 1 (non-muscle)                                                                  | 1,645596696                                         | 0,023982924                                               |                                         |              |             |
|                 |                                                                                   | CYFIP1                                                 | cytoplasmic FMR1 interacting protein 1                                                  | 1,404888717                                         | 0,025109081                                               |                                         |              |             |
|                 |                                                                                   | CYFIP2                                                 | cytoplasmic FMR1 interacting protein 2                                                  | -4,810260509                                        | 1,06932E-09                                               |                                         |              |             |
|                 |                                                                                   | DIAPH1                                                 | diaphanous-related formin 1                                                             | 1,43994947                                          | 0,001519606                                               |                                         |              |             |
|                 |                                                                                   | DSTN                                                   | destrin (actin depolymerizing factor)                                                   | -1,857782582                                        | 5,36051E-07                                               |                                         |              |             |
|                 |                                                                                   | EZR                                                    | ezrin                                                                                   | N/A                                                 | N/A                                                       |                                         |              |             |
|                 |                                                                                   | FSCN2                                                  | fascin homolog 2, actin-bundling protein, retinal (Strongylocentrotus purpuratus)       | N/A                                                 | N/A                                                       |                                         |              |             |
|                 |                                                                                   | GSN                                                    | gelsolin                                                                                | 1,112789136                                         | 0,709080846                                               |                                         |              |             |
|                 |                                                                                   | IQGAP2                                                 | IQ Motif Containing GTPase Activating Protein 2                                         | 2,74804037                                          | 7,64335E-05                                               |                                         |              |             |
|                 |                                                                                   | MACF1                                                  | Microtubule-Actin Crosslinking Factor 1                                                 | -1,167367445                                        | 0,259876985                                               |                                         |              |             |
|                 |                                                                                   | PFN2                                                   | profilin 2                                                                              | -2,16349467                                         | 0,000129815                                               |                                         |              |             |
|                 |                                                                                   | RDX                                                    | radixin                                                                                 | 2,764613092                                         | 0,000635606                                               |                                         |              |             |
|                 |                                                                                   | SSH1                                                   | slingshot protein phosphatase 1                                                         | 1,029327282                                         | 0,650872594                                               |                                         |              |             |
|                 |                                                                                   | SSH2                                                   | slingshot protein phosphatase 2                                                         | 1,169892989                                         | 0,277768942                                               |                                         |              |             |
|                 |                                                                                   | WASF1                                                  | WAS protein family, member 1                                                            | -4,02396288                                         | 1,88158E-06                                               |                                         |              |             |
|                 |                                                                                   | WASL                                                   | Wiskott-Aldrich syndrome-like                                                           | -1,068542555                                        | 0,501791705                                               |                                         |              |             |
|                 |                                                                                   | VASP                                                   | vasodilator-stimulated phosphoprotein                                                   | 1,525254084                                         | 0,002909487                                               |                                         |              |             |
|                 |                                                                                   | Actin Filaments                                        | OR                                                                                      | ARAP1                                               | ArfGAP with RhoGAP domain, ankyrin repeat and PH domain 1 | N/A                                     | N/A          |             |
|                 |                                                                                   |                                                        |                                                                                         | ARFIP2                                              | ADP-ribosylation factor interacting protein 2             | 1,333546786                             | 0,017886494  |             |
| ARHGDB18        | Rho GDP Dissociation Inhibitor (GDI) Beta                                         |                                                        |                                                                                         | N/A                                                 | N/A                                                       |                                         |              |             |
| ARHGGEF11       | Rho guanine nucleotide exchange factor (GEF) 11                                   |                                                        |                                                                                         | -1,335574534                                        | 0,044884968                                               |                                         |              |             |
| ARPC4           | actin related protein 2/3 complex, subunit 4. 20kDa                               |                                                        |                                                                                         | 1,259909509                                         | 0,046854047                                               |                                         |              |             |
| CASK            | calcium/calmodulin-dependent serine protein kinase (MAGUK family)                 |                                                        |                                                                                         | 2,513877779                                         | 7,90035E-05                                               |                                         |              |             |
| CDC42           | cell division cycle 42                                                            |                                                        |                                                                                         | -1,698341557                                        | 1,81298E-05                                               |                                         |              |             |
| CDC42BPA        | CDC42 binding protein kinase alpha (DMPK-like)                                    |                                                        |                                                                                         | -1,432138592                                        | 0,000719385                                               |                                         |              |             |
| CFL1            | cofilin 1 (non-muscle)                                                            |                                                        |                                                                                         | 1,645596696                                         | 0,023982924                                               |                                         |              |             |
| CRK             | v- <i>crk</i> sarcoma virus CT10 oncogene homolog (avian)                         |                                                        |                                                                                         | 1,284086367                                         | 0,014514228                                               |                                         |              |             |
| DIAPH1          | diaphanous-related formin 1                                                       |                                                        |                                                                                         | 1,43994947                                          | 0,001519606                                               |                                         |              |             |
| DSTN            | destrin (actin depolymerizing factor)                                             |                                                        |                                                                                         | -1,857782582                                        | 5,36051E-07                                               |                                         |              |             |
| EZR             | ezrin                                                                             |                                                        |                                                                                         | N/A                                                 | N/A                                                       |                                         |              |             |
| FSCN2           | fascin homolog 2, actin-bundling protein, retinal (Strongylocentrotus purpuratus) |                                                        |                                                                                         | N/A                                                 | N/A                                                       |                                         |              |             |
| GSN             | gelsolin                                                                          |                                                        |                                                                                         | 1,112789136                                         | 0,709080846                                               |                                         |              |             |
| IQGAP1          | IQ motif containing GTPase activating protein 1                                   |                                                        |                                                                                         | 2,74804037                                          | 7,64335E-05                                               |                                         |              |             |
| LIMK1           | LIM domain kinase 1                                                               |                                                        |                                                                                         | -2,446843602                                        | 2,62139E-05                                               |                                         |              |             |
| LIMK2           | LIM domain kinase 2                                                               |                                                        |                                                                                         | -1,028411463                                        | 0,761874097                                               |                                         |              |             |
| NCK1            | NCK adaptor protein 1                                                             |                                                        |                                                                                         | 1,618789345                                         | 0,000479158                                               |                                         |              |             |
| PFN2            | profilin 2                                                                        |                                                        |                                                                                         | -2,16349467                                         | 0,000129815                                               |                                         |              |             |
| RDX             | radixin                                                                           |                                                        |                                                                                         | 2,764613092                                         | 0,000635606                                               |                                         |              |             |
| RHOA            | ras homolog family member A                                                       |                                                        |                                                                                         | 1,236798655                                         | 0,100369469                                               |                                         |              |             |
| ROCK1           | Rho-associated, coiled-coil containing protein kinase 1                           |                                                        |                                                                                         | 1,493960786                                         | 3,52551E-06                                               |                                         |              |             |
| SSH1            | slingshot protein phosphatase 1                                                   |                                                        |                                                                                         | 1,029327282                                         | 0,650872594                                               |                                         |              |             |
| SSH2            | slingshot protein phosphatase 2                                                   |                                                        |                                                                                         | 1,169892989                                         | 0,277768942                                               |                                         |              |             |
| Actin Filaments | P-D                                                                               |                                                        |                                                                                         | ACTR3                                               | ARP3 actin-related protein 3 homolog (yeast)              | 1,504270418                             | 0,0009155    |             |
|                 |                                                                                   |                                                        |                                                                                         | ARHGAP6                                             | Rho GTPase activating protein 6                           | -1,133600022                            | 0,437233372  |             |
|                 |                                                                                   |                                                        |                                                                                         | ARPC1B                                              | actin related protein 2/3 complex, subunit 1B. 41kDa      | 2,906922396                             | 0,001863115  |             |
|                 |                                                                                   | ARPC2                                                  | actin related protein 2/3 complex, subunit 2. 34kDa                                     | 1,079396338                                         | 0,176365232                                               |                                         |              |             |
|                 |                                                                                   | ARPC3                                                  | actin related protein 2/3 complex, subunit 3. 21kDa                                     | -1,044050354                                        | 0,643502179                                               |                                         |              |             |
|                 |                                                                                   | ARPC4                                                  | actin related protein 2/3 complex, subunit 4. 20kDa                                     | 1,259909509                                         | 0,046854047                                               |                                         |              |             |
|                 |                                                                                   | ARPC5                                                  | actin related protein 2/3 complex, subunit 5. 16kDa                                     | 1,409263608                                         | 0,00497167                                                |                                         |              |             |
|                 |                                                                                   | CDC42EP2                                               | CDC42 effector protein (Rho GTPase binding) 2                                           | -3,468782451                                        | 2,68607E-07                                               |                                         |              |             |
|                 |                                                                                   | DSTN                                                   | destrin (actin depolymerizing factor)                                                   | -1,857782582                                        | 5,36051E-07                                               |                                         |              |             |
|                 |                                                                                   | FNBP1L                                                 | formin binding protein 1-like                                                           | 1,691883081                                         | 0,00042507                                                |                                         |              |             |
|                 |                                                                                   | GSN                                                    | gelsolin                                                                                | 1,112789136                                         | 0,709080846                                               |                                         |              |             |
|                 |                                                                                   | NCK1                                                   | NCK adaptor protein 1                                                                   | 1,618789345                                         | 0,000479158                                               |                                         |              |             |
|                 |                                                                                   | NCK2                                                   | NCK adaptor protein 2                                                                   | -1,283161905                                        | 0,000300717                                               |                                         |              |             |
|                 |                                                                                   | PFN2                                                   | profilin 2                                                                              | -2,16349467                                         | 0,000129815                                               |                                         |              |             |
|                 |                                                                                   | PIKFYVE                                                | phosphoinositide kinase, FYVE finger containing                                         | N/A                                                 | N/A                                                       |                                         |              |             |
|                 |                                                                                   | RAC1                                                   | ras-related C3 botulinum toxin substrate 1 (rho family, small GTP binding protein Rac1) | 1,368129899                                         | 0,006899561                                               |                                         |              |             |
|                 |                                                                                   | WAS                                                    | Wiskott-Aldrich syndrome                                                                | -1,035461912                                        | 0,648709347                                               |                                         |              |             |
|                 |                                                                                   | WASF1                                                  | WAS protein family, member 1                                                            | -4,02396288                                         | 1,88158E-06                                               |                                         |              |             |
|                 |                                                                                   | WASL                                                   | Wiskott-Aldrich syndrome-like                                                           | -1,068542555                                        | 0,501791705                                               |                                         |              |             |
|                 |                                                                                   | Microtubules                                           | CC                                                                                      | ARFIP2                                              | ADP-ribosylation factor interacting protein 2             | 1,333546786                             | 0,017886494  |             |
|                 |                                                                                   |                                                        |                                                                                         | CLASP1                                              | cytoplasmic linker associated protein 1                   | -1,153968055                            | 0,178087875  |             |
|                 |                                                                                   |                                                        |                                                                                         | CTTN                                                | cortactin                                                 | 1,12049064                              | 0,091010693  |             |
|                 |                                                                                   |                                                        |                                                                                         | DSTN                                                | destrin (actin depolymerizing factor)                     | -1,857782582                            | 5,36051E-07  |             |
|                 |                                                                                   |                                                        |                                                                                         | EZR                                                 | ezrin                                                     | N/A                                     | N/A          |             |
|                 |                                                                                   |                                                        |                                                                                         | LLGL1                                               | lethal giant larvae homolog 1 (Drosophila)                | -1,101158545                            | 0,088364623  |             |
|                 |                                                                                   |                                                        |                                                                                         | MAPRE1                                              | microtubule-associated protein, RP/EB family, member 1    | 1,867360139                             | 9,74618E-09  |             |
|                 |                                                                                   |                                                        |                                                                                         | IP                                                  | CLASP1                                                    | cytoplasmic linker associated protein 1 | -1,153968055 | 0,178087875 |
|                 |                                                                                   |                                                        |                                                                                         |                                                     | CLASP2                                                    | cytoplasmic linker associated protein 2 | -2,223009787 | 2,1733E-06  |
| CLIP1           | CAP-GLY domain containing linker protein 1                                        |                                                        |                                                                                         |                                                     | -1,540032252                                              | 0,004227699                             |              |             |
| CLIP2           | CAP-GLY domain containing linker protein 2                                        |                                                        |                                                                                         |                                                     | 1,637255249                                               | 0,056297992                             |              |             |
| MACF1           | microtubule-actin crosslinking factor 1                                           |                                                        |                                                                                         |                                                     | -1,167367445                                              | 0,259876985                             |              |             |
| MAP4            | microtubule-associated protein 4                                                  |                                                        | 2,026102822                                                                             |                                                     | 0,000342443                                               |                                         |              |             |
| MAPRE1          | microtubule-associated protein, RP/EB family, member 1                            |                                                        | 1,867360139                                                                             |                                                     | 9,74618E-09                                               |                                         |              |             |
| MAPRE2          | microtubule-associated protein, RP/EB family, member 2                            |                                                        | -1,350502445                                                                            |                                                     | 0,005877551                                               |                                         |              |             |
| MAPT            | microtubule-associated protein tau                                                |                                                        | -2,092003283                                                                            |                                                     | 0,000123241                                               |                                         |              |             |
| MID1            | midline 1 (Opitz/BBB syndrome)                                                    |                                                        | 2,164802551                                                                             |                                                     | 0,004733856                                               |                                         |              |             |
| RACGAP1         | Rac GTPase activating protein 1                                                   |                                                        | 3,5627358                                                                               |                                                     | 1,31235E-05                                               |                                         |              |             |
| STMN1           | stathmin 1                                                                        |                                                        | -1,612619976                                                                            |                                                     | 0,00719846                                                |                                         |              |             |
| Microtubules    | OR                                                                                |                                                        | CLASP1                                                                                  | cytoplasmic linker associated protein 1             | -1,153968055                                              | 0,178087875                             |              |             |
|                 |                                                                                   |                                                        | MAPT                                                                                    | microtubule-associated protein tau                  | -2,092003283                                              | 0,000123241                             |              |             |
|                 |                                                                                   |                                                        | MID1                                                                                    | midline 1 (Opitz/BBB syndrome)                      | 2,164802551                                               | 0,004733856                             |              |             |
|                 |                                                                                   |                                                        | PHLDB2                                                                                  | pleckstrin homology-like domain, family B, member 2 | -1,13353699                                               | 0,702215381                             |              |             |
|                 | STMN1                                                                             |                                                        | stathmin 1                                                                              | -1,612619976                                        | 0,00719846                                                |                                         |              |             |
|                 | P-D                                                                               |                                                        | CLASP1                                                                                  | cytoplasmic linker associated protein 1             | -1,153968055                                              | 0,178087875                             |              |             |
|                 |                                                                                   |                                                        | CLASP2                                                                                  | cytoplasmic linker associated protein 2             | -2,223009787                                              | 2,1733E-06                              |              |             |
|                 |                                                                                   |                                                        | MAP4                                                                                    | microtubule-associated protein 4                    | 2,026102822                                               | 0,000342443                             |              |             |
| MAPRE1          |                                                                                   |                                                        | microtubule-associated protein, RP/EB family, member 1                                  | 1,867360139                                         | 9,74618E-09                                               |                                         |              |             |
| SP              | MAPRE2                                                                            | microtubule-associated protein, RP/EB family, member 2 | -1,350502445                                                                            | 0,005877551                                         |                                                           |                                         |              |             |
|                 | MAPT                                                                              | microtubule-associated protein tau                     | -2,092003283                                                                            | 0,000123241                                         |                                                           |                                         |              |             |
|                 | STMN1                                                                             | stathmin 1                                             | -1,612619976                                                                            | 0,00719846                                          |                                                           |                                         |              |             |
|                 | AURKA                                                                             | aurora kinase A                                        | 3,667852103                                                                             | 8,01778E-05                                         |                                                           |                                         |              |             |
| AURKB           | aurora kinase B                                                                   | N/A                                                    | N/A                                                                                     |                                                     |                                                           |                                         |              |             |
| CLASP1          | cytoplasmic linker associated protein 1                                           | -1,153968055                                           | 0,178087875                                                                             |                                                     |                                                           |                                         |              |             |
| CLASP2          | cytoplasmic linker associated protein 2                                           | -2,223009787                                           | 2,1733E-06                                                                              |                                                     |                                                           |                                         |              |             |
| CLIP1           | CAP-GLY domain containing linker protein 1                                        | -1,540032252                                           | 0,004227699                                                                             |                                                     |                                                           |                                         |              |             |

|                                      |                                                         |                                                                                         |                                                                                         |                                   |             |             |
|--------------------------------------|---------------------------------------------------------|-----------------------------------------------------------------------------------------|-----------------------------------------------------------------------------------------|-----------------------------------|-------------|-------------|
| Projections                          | AX                                                      | MAPRE1                                                                                  | microtubule-associated protein, RP/EB family, member 1                                  | 1,867360139                       | 9,74618E-09 |             |
|                                      |                                                         | RACGAP1                                                                                 | Rac GTPase activating protein 1                                                         | 3,5627358                         | 1,31235E-05 |             |
|                                      | FL                                                      | <b>Fold change (Tumor vs Normal)</b>                                                    |                                                                                         | <b>p-paired (Tumor vs Normal)</b> |             |             |
|                                      |                                                         | BAIAP2                                                                                  | BAI1-associated protein 2                                                               | -2,009296693                      | 4,14814E-11 |             |
|                                      |                                                         | CDK5                                                                                    | cyclin-dependent kinase 5                                                               | -2,055868754                      | 0,000117232 |             |
|                                      |                                                         | CDK5R1                                                                                  | cyclin-dependent kinase 5, regulatory subunit 1 (p35)                                   | -2,856023697                      | 7,39998E-08 |             |
|                                      |                                                         | CYFIP1                                                                                  | cytoplasmic FMR1 interacting protein 1                                                  | 1,404888717                       | 0,025109081 |             |
|                                      | G                                                       | CYFIP2                                                                                  | cytoplasmic FMR1 interacting protein 2                                                  | -4,810260509                      | 1,06932E-09 |             |
|                                      |                                                         | MAPT                                                                                    | microtubule-associated protein tau                                                      | -2,092003283                      | 0,000123241 |             |
|                                      |                                                         | <b>Fold change (Tumor vs Normal)</b>                                                    |                                                                                         | <b>p-paired (Tumor vs Normal)</b> |             |             |
|                                      |                                                         | ARAP1                                                                                   | BAI1-associated protein 2                                                               | N/A                               | N/A         |             |
|                                      |                                                         | BAIAP2                                                                                  | BAI1-associated protein 2                                                               | -2,009296693                      | 4,14814E-11 |             |
|                                      | LAM                                                     | CDC42                                                                                   | cell division cycle 42                                                                  | -1,698341557                      | 1,81298E-05 |             |
|                                      |                                                         | CDK5                                                                                    | cyclin-dependent kinase 5                                                               | -2,055868754                      | 0,000117232 |             |
|                                      |                                                         | EZR                                                                                     | ezrin                                                                                   | N/A                               | N/A         |             |
|                                      |                                                         | MSN                                                                                     | moesin                                                                                  | 2,808453914                       | 0,000121129 |             |
|                                      |                                                         | RDX                                                                                     | radixin                                                                                 | 2,764613092                       | 0,000635606 |             |
|                                      | MV                                                      | <b>Fold change (Tumor vs Normal)</b>                                                    |                                                                                         | <b>p-paired (Tumor vs Normal)</b> |             |             |
|                                      |                                                         | CDK5                                                                                    | cyclin-dependent kinase 5                                                               | -2,055868754                      | 0,000117232 |             |
|                                      |                                                         | CDK5R1                                                                                  | cyclin-dependent kinase 5, regulatory subunit 1 (p35)                                   | -2,856023697                      | 7,39998E-08 |             |
|                                      |                                                         | MAPT                                                                                    | microtubule-associated protein tau                                                      | -2,092003283                      | 0,000123241 |             |
|                                      |                                                         | <b>Fold change (Tumor vs Normal)</b>                                                    |                                                                                         | <b>p-paired (Tumor vs Normal)</b> |             |             |
|                                      |                                                         | ACTR3                                                                                   | ARP3 actin-related protein 3 homolog (yeast)                                            | 1,504270418                       | 0,0009155   |             |
|                                      |                                                         | ARFIP2                                                                                  | ADP-ribosylation factor interacting protein 2                                           | 1,333546786                       | 0,017886494 |             |
|                                      |                                                         | ARPC5                                                                                   | actin related protein 2/3 complex, subunit 5, 16kDa                                     | 1,409263608                       | 0,00497167  |             |
|                                      |                                                         | CDK5                                                                                    | cyclin-dependent kinase 5                                                               | -2,055868754                      | 0,000117232 |             |
|                                      |                                                         | CTTN                                                                                    | cortactin                                                                               | 1,12049064                        | 0,091010693 |             |
|                                      |                                                         | CYFIP1                                                                                  | cytoplasmic FMR1 interacting protein 1                                                  | 1,404888717                       | 0,025109081 |             |
|                                      |                                                         | CYFIP2                                                                                  | cytoplasmic FMR1 interacting protein 2                                                  | -4,810260509                      | 1,06932E-09 |             |
|                                      |                                                         | P                                                                                       | NCK1                                                                                    | NCK adaptor protein 1             | 1,618789345 | 0,000479158 |
|                                      | PPP1R12A                                                |                                                                                         | protein phosphatase 1, regulatory subunit 12A                                           | -1,18774202                       | 0,029222005 |             |
|                                      | PPP1R12B                                                |                                                                                         | protein phosphatase 1, regulatory subunit 12B                                           | -2,094004198                      | 1,6679E-06  |             |
|                                      | RAC1                                                    |                                                                                         | ras-related C3 botulinum toxin substrate 1 (rho family, small GTP binding protein Rac1) | 1,368129899                       | 0,006899561 |             |
| RDX                                  | radixin                                                 |                                                                                         | 2,764613092                                                                             | 0,000635606                       |             |             |
| WASL                                 | Wiskott-Aldrich syndrome-like                           |                                                                                         | -1,068542555                                                                            | 0,501791705                       |             |             |
| <b>Fold change (Tumor vs Normal)</b> |                                                         |                                                                                         | <b>p-paired (Tumor vs Normal)</b>                                                       |                                   |             |             |
| EZR                                  | ezrin                                                   |                                                                                         | N/A                                                                                     | N/A                               |             |             |
| MSN                                  | moesin                                                  |                                                                                         | 2,808453914                                                                             | 0,000121129                       |             |             |
| RDX                                  | radixin                                                 |                                                                                         | 2,764613092                                                                             | 0,000635606                       |             |             |
| RF                                   | <b>Fold change (Tumor vs Normal)</b>                    |                                                                                         | <b>p-paired (Tumor vs Normal)</b>                                                       |                                   |             |             |
|                                      | CDC42                                                   |                                                                                         | cell division cycle 42                                                                  | -1,698341557                      | 1,81298E-05 |             |
| CDC42EP2                             | CDC42 effector protein (Rho GTPase binding) 2           |                                                                                         | -3,468782451                                                                            | 2,68607E-07                       |             |             |
| CS-S-P                               | <b>Fold change (Tumor vs Normal)</b>                    |                                                                                         | <b>p-paired (Tumor vs Normal)</b>                                                       |                                   |             |             |
|                                      | ARFIP2                                                  | ADP-ribosylation factor interacting protein 2                                           | 1,333546786                                                                             | 0,017886494                       |             |             |
|                                      | CTTN                                                    | cortactin                                                                               | 1,12049064                                                                              | 0,091010693                       |             |             |
|                                      | CYFIP1                                                  | cytoplasmic FMR1 interacting protein 1                                                  | 1,404888717                                                                             | 0,025109081                       |             |             |
|                                      | CYFIP2                                                  | cytoplasmic FMR1 interacting protein 2                                                  | -4,810260509                                                                            | 1,06932E-09                       |             |             |
|                                      | EZR                                                     | ezrin                                                                                   | N/A                                                                                     | N/A                               |             |             |
|                                      | RAC1                                                    | ras-related C3 botulinum toxin substrate 1 (rho family, small GTP binding protein Rac1) | 1,368129899                                                                             | 0,006899561                       |             |             |
|                                      | RDX                                                     | radixin                                                                                 | 2,764613092                                                                             | 0,000635606                       |             |             |
|                                      | <b>Fold change (Tumor vs Normal)</b>                    |                                                                                         | <b>p-paired (Tumor vs Normal)</b>                                                       |                                   |             |             |
|                                      | ARAP1                                                   | ArfGAP with RhoGAP domain, ankyrin repeat and PH domain 1                               | N/A                                                                                     | N/A                               |             |             |
| ARHGEF11                             | Rho guanine nucleotide exchange factor (GEF) 11         | -1,335574534                                                                            | 0,044884968                                                                             |                                   |             |             |
| CDC42                                | cell division cycle 42                                  | -1,698341557                                                                            | 1,81298E-05                                                                             |                                   |             |             |
| CDC42EP2                             | CDC42 effector protein (Rho GTPase binding) 2           | -3,468782451                                                                            | 2,68607E-07                                                                             |                                   |             |             |
| CDC42EP3                             | CDC42 effector protein (Rho GTPase binding) 3           | -1,453285561                                                                            | 0,008479265                                                                             |                                   |             |             |
| CLASP1                               | cytoplasmic linker associated protein 1                 | -1,153968055                                                                            | 0,178087875                                                                             |                                   |             |             |
| CLASP2                               | cytoplasmic linker associated protein 2                 | -2,223009787                                                                            | 2,1733E-06                                                                              |                                   |             |             |
| CYFIP1                               | cytoplasmic FMR1 interacting protein 1                  | 1,404888717                                                                             | 0,025109081                                                                             |                                   |             |             |
| CYFIP2                               | cytoplasmic FMR1 interacting protein 2                  | -4,810260509                                                                            | 1,06932E-09                                                                             |                                   |             |             |
| EZR                                  | ezrin                                                   | N/A                                                                                     | N/A                                                                                     |                                   |             |             |
| LLGL1                                | lethal giant larvae homolog 1 (Drosophila)              | -1,101158545                                                                            | 0,088364623                                                                             |                                   |             |             |
| MARK2                                | MAP/microtubule affinity-regulating kinase 2            | -1,602813134                                                                            | 0,00113748                                                                              |                                   |             |             |
| MYLK2                                | myosin light chain kinase 2                             | -1,036532339                                                                            | 0,818797793                                                                             |                                   |             |             |
| SSH1                                 | slingshot protein phosphatase 2                         | 1,029327282                                                                             | 0,650872594                                                                             |                                   |             |             |
| CMM                                  | <b>Fold change (Tumor vs Normal)</b>                    |                                                                                         | <b>p-paired (Tumor vs Normal)</b>                                                       |                                   |             |             |
|                                      | ACTR2                                                   | ARP2 actin-related protein 2 homolog (yeast)                                            | -1,073835449                                                                            | 0,455483458                       |             |             |
|                                      | ACTR3                                                   | ARP3 actin-related protein 3 homolog (yeast)                                            | 1,504270418                                                                             | 0,0009155                         |             |             |
|                                      | ARAP1                                                   | ArfGAP with RhoGAP domain, ankyrin repeat and PH domain 1                               | N/A                                                                                     | N/A                               |             |             |
|                                      | ARFIP2                                                  | ADP-ribosylation factor interacting protein 2                                           | 1,333546786                                                                             | 0,017886494                       |             |             |
|                                      | ARHGDB18                                                | Rho GDP Dissociation Inhibitor (GDI) Beta                                               | N/A                                                                                     | N/A                               |             |             |
|                                      | ARHGEF11                                                | Rho guanine nucleotide exchange factor (GEF) 11                                         | -1,335574534                                                                            | 0,044884968                       |             |             |
|                                      | ARPC1B                                                  | actin related protein 2/3 complex, subunit 1B, 41kDa                                    | 2,906922396                                                                             | 0,001863115                       |             |             |
|                                      | ARPC2                                                   | actin related protein 2/3 complex, subunit 2, 34kDa                                     | 1,079396338                                                                             | 0,176365232                       |             |             |
|                                      | ARPC3                                                   | actin related protein 2/3 complex, subunit 3, 21kDa                                     | -1,044050354                                                                            | 0,643502179                       |             |             |
|                                      | ARPC5                                                   | actin related protein 2/3 complex, subunit 5, 16kDa                                     | 1,409263608                                                                             | 0,00497167                        |             |             |
|                                      | CALD1                                                   | caldesmon 1                                                                             | 3,205977129                                                                             | 1,40935E-05                       |             |             |
|                                      | CDK5                                                    | cyclin-dependent kinase 5                                                               | -2,055868754                                                                            | 0,000117232                       |             |             |
|                                      | CDK5R1                                                  | cyclin-dependent kinase 5, regulatory subunit 1 (p35)                                   | -2,856023697                                                                            | 7,39998E-08                       |             |             |
|                                      | DSTN                                                    | destrin (actin depolymerizing factor)                                                   | -1,857782582                                                                            | 5,36051E-07                       |             |             |
|                                      | MSN                                                     | moesin                                                                                  | 2,808453914                                                                             | 0,000121129                       |             |             |
|                                      | NCK1                                                    | NCK adaptor protein 1                                                                   | 1,618789345                                                                             | 0,000479158                       |             |             |
|                                      | PAK4                                                    | p21 protein (Cdc42/Rac)-activated kinase 4                                              | 1,192387393                                                                             | 0,054052728                       |             |             |
|                                      | RAC1                                                    | ras-related C3 botulinum toxin substrate 1 (rho family, small GTP binding protein Rac1) | 1,368129899                                                                             | 0,006899561                       |             |             |
|                                      | ROCK1                                                   | Rho-associated, coiled-coil containing protein kinase 1                                 | 1,493960786                                                                             | 3,52551E-06                       |             |             |
|                                      | WASF1                                                   | WAS protein family, member 1                                                            | -4,02396288                                                                             | 1,88158E-06                       |             |             |
|                                      | WASL                                                    | Wiskott-Aldrich syndrome-like                                                           | -1,068542555                                                                            | 0,501791705                       |             |             |
|                                      | Cell Cycle                                              | <b>Fold change (Tumor vs Normal)</b>                                                    |                                                                                         | <b>p-paired (Tumor vs Normal)</b> |             |             |
| AURKA                                |                                                         | aurora kinase A                                                                         | 3,667852103                                                                             | 8,01778E-05                       |             |             |
| AURKB                                |                                                         | aurora kinase B                                                                         | N/A                                                                                     | N/A                               |             |             |
| CCNA1                                |                                                         | cyclin A1                                                                               | -5,183452848                                                                            | 3,92901E-08                       |             |             |
| CCNB2                                |                                                         | cyclin B2                                                                               | 10,1492354                                                                              | 0,000334039                       |             |             |
| CIT                                  |                                                         | citron (rho-interacting, serine/threonine kinase 21)                                    | -2,7196239                                                                              | 1,94279E-05                       |             |             |
| CLASP1                               |                                                         | cytoplasmic linker associated protein 1                                                 | -1,153968055                                                                            | 0,178087875                       |             |             |
| CLASP2                               |                                                         | cytoplasmic linker associated protein 2                                                 | -2,223009787                                                                            | 2,1733E-06                        |             |             |
| CLIP1                                |                                                         | CAP-GLY domain containing linker protein 1                                              | -1,540032252                                                                            | 0,004227699                       |             |             |
| MAPRE1                               |                                                         | microtubule-associated protein, RP/EB family, member 1                                  | 1,867360139                                                                             | 9,74618E-09                       |             |             |
| MAPRE2                               |                                                         | microtubule-associated protein, RP/EB family, member 2                                  | -1,350502445                                                                            | 0,005877551                       |             |             |
| <b>Fold change (Tumor vs Normal)</b> |                                                         | <b>p-paired (Tumor vs Normal)</b>                                                       |                                                                                         |                                   |             |             |
| ARHGEF11                             |                                                         | Rho guanine nucleotide exchange factor (GEF) 11                                         | -1,335574534                                                                            | 0,044884968                       |             |             |
| AURKB                                |                                                         | aurora kinase B                                                                         | N/A                                                                                     | N/A                               |             |             |
| AURKC                                |                                                         | aurora kinase C                                                                         | 1,666446974                                                                             | 0,028995905                       |             |             |
| DSTN                                 | destrin (actin depolymerizing factor)                   | -1,857782582                                                                            | 5,36051E-07                                                                             |                                   |             |             |
| RACGAP1                              | Rac GTPase activating protein 1                         | 3,5627358                                                                               | 1,31235E-05                                                                             |                                   |             |             |
| ROCK1                                | Rho-associated, coiled-coil containing protein kinase 1 | 1,493960786                                                                             | 3,52551E-06                                                                             |                                   |             |             |
| Cal                                  | <b>Fold change (Tumor vs Normal)</b>                    |                                                                                         | <b>p-paired (Tumor vs Normal)</b>                                                       |                                   |             |             |
|                                      | BAIAP2                                                  | BAI1-associated protein 2                                                               | -2,009296693                                                                            | 4,14814E-11                       |             |             |
|                                      | MSN                                                     | moesin                                                                                  | 2,808453914                                                                             | 0,000121129                       |             |             |
|                                      | NCK1                                                    | NCK adaptor protein 1                                                                   | 1,618789345                                                                             | 0,000479158                       |             |             |
|                                      | NCK2                                                    | NCK adaptor protein 2                                                                   | -1,283161905                                                                            | 0,000300717                       |             |             |
| PAK1                                 | p21 protein (Cdc42/Rac)-activated kinase 1              | -3,411655019                                                                            | 1,93631E-06                                                                             |                                   |             |             |
| <b>Fold change (Tumor vs Normal)</b> |                                                         | <b>p-paired (Tumor vs Normal)</b>                                                       |                                                                                         |                                   |             |             |



|                      |                                                         |              |                                                                                         |                                      |                                   |
|----------------------|---------------------------------------------------------|--------------|-----------------------------------------------------------------------------------------|--------------------------------------|-----------------------------------|
|                      |                                                         | CALD1        | caldesmon 1                                                                             | 3,205977129                          | 1,40935E-05                       |
|                      |                                                         | CALM1        | calmodulin 1 (phosphorylase kinase, delta)                                              | -2,035309518                         | 1,27552E-05                       |
|                      |                                                         | CASK         | calcium/calmodulin-dependent serine protein kinase (MAGUK family)                       | 2,513877779                          | 7,90035E-05                       |
|                      |                                                         | IQGAP1       | IQ motif containing GTPase activating protein 1                                         | 2,74804037                           | 7,64335E-05                       |
|                      |                                                         | IQGAP2       | IQ motif containing GTPase activating protein 2                                         | 8,329465659                          | 0,000618624                       |
|                      |                                                         | MYLK         | myosin light chain kinase                                                               | -1,796372626                         | 0,000510053                       |
|                      |                                                         | MYLK2        | myosin light chain kinase 2                                                             | -1,036532339                         | 0,818797793                       |
|                      |                                                         | PPP3CA       | protein phosphatase 3, catalytic subunit, alpha isozyme                                 | -4,359838933                         | 6,14416E-08                       |
|                      |                                                         | PPP3CB       | protein phosphatase 3, catalytic subunit, beta isozyme                                  | -4,105229363                         | 1,18517E-09                       |
| <b>G-Prot</b>        | <b>G-Prot</b>                                           |              |                                                                                         | <b>Fold change (Tumor vs Normal)</b> | <b>p-paired (Tumor vs Normal)</b> |
|                      |                                                         | ARAP1        | ArfGAP with RhoGAP domain, ankyrin repeat and PH domain 1                               | N/A                                  | N/A                               |
|                      |                                                         | ARFIP2       | ADP-ribosylation factor interacting protein 2                                           | 1,333546786                          | 0,017886494                       |
|                      |                                                         | ARHGAP6      | Rho GTPase activating protein 6                                                         | -1,133600022                         | 0,437233372                       |
|                      |                                                         | ARHGDI8      | Rho GDP Dissociation Inhibitor (GDI) Beta                                               | N/A                                  | N/A                               |
|                      |                                                         | ARHGDF11     | Rho guanine nucleotide exchange factor (GEF) 11                                         | -1,335574534                         | 0,044884968                       |
|                      |                                                         | CDC42        | cell division cycle 42                                                                  | -1,698341557                         | 1,81298E-05                       |
|                      |                                                         | CDC42EP2     | CDC42 effector protein (Rho GTPase binding) 2                                           | -3,468782451                         | 2,68607E-07                       |
|                      |                                                         | CFL1         | cofilin 1 (non-muscle)                                                                  | 1,645596696                          | 0,023982924                       |
|                      |                                                         | CIT          | citron (rho-interacting, serine/threonine kinase 21)                                    | -2,7196239                           | 1,94279E-05                       |
|                      |                                                         | CYFIP1       | cytoplasmic FMR1 interacting protein 1                                                  | 1,404888717                          | 0,025109081                       |
|                      |                                                         | CYFIP2       | cytoplasmic FMR1 interacting protein 2                                                  | -4,810260509                         | 1,06932E-09                       |
|                      |                                                         | DIAPH1       | diaphanous-related formin 1                                                             | 1,43994947                           | 0,001519606                       |
|                      |                                                         | IQGAP1       | IQ motif containing GTPase activating protein 1                                         | 2,74804037                           | 7,64335E-05                       |
|                      |                                                         | IQGAP2       | IQ motif containing GTPase activating protein 2                                         | 8,329465659                          | 0,000618624                       |
|                      |                                                         | LIMK1        | LIM domain kinase 1                                                                     | -2,446843602                         | 2,62139E-05                       |
|                      |                                                         | LIMK2        | LIM domain kinase 2                                                                     | -1,028411463                         | 0,761874097                       |
|                      |                                                         | MAPK13       | mitogen-activated protein kinase 13                                                     | -1,132843673                         | 0,101824605                       |
|                      |                                                         | RAC1         | ras-related C3 botulinum toxin substrate 1 (rho family, small GTP binding protein Rac1) | 1,368129899                          | 0,006899561                       |
|                      |                                                         | RACGAP1      | Rac GTPase activating protein 1                                                         | 3,5627358                            | 1,31235E-05                       |
| RHOA                 | ras homolog family member A                             | 1,236798655  | 0,100369469                                                                             |                                      |                                   |
| ROCK1                | Rho-associated, coiled-coil containing protein kinase 1 | 1,493960786  | 3,52551E-06                                                                             |                                      |                                   |
| TIAM1                | T-cell lymphoma invasion and metastasis 1               | -1,873195325 | 2,35526E-06                                                                             |                                      |                                   |
| WAS                  | Wiskott-Aldrich syndrome                                | -1,035461912 | 0,648709347                                                                             |                                      |                                   |
| WASL                 | Wiskott-Aldrich syndrome-like                           | -1,068542555 | 0,501791705                                                                             |                                      |                                   |
| <b>Kin &amp; Pho</b> | <b>Kin &amp; Pho</b>                                    |              |                                                                                         | <b>Fold change (Tumor vs Normal)</b> | <b>p-paired (Tumor vs Normal)</b> |
|                      |                                                         | AURKA        | aurora kinase A                                                                         | 3,667852103                          | 8,01778E-05                       |
|                      |                                                         | AURKB        | aurora kinase B                                                                         | N/A                                  | N/A                               |
|                      |                                                         | AURKC        | aurora kinase C                                                                         | 1,666346974                          | 0,028995905                       |
|                      |                                                         | CASK         | calcium/calmodulin-dependent serine protein kinase (MAGUK family)                       | 2,513877779                          | 7,90035E-05                       |
|                      |                                                         | CDC42BPA     | CDC42 binding protein kinase alpha (DMPK-like)                                          | -1,432138592                         | 0,000719385                       |
|                      |                                                         | CDK5         | cyclin-dependent kinase 5                                                               | -2,05868754                          | 0,000117232                       |
|                      |                                                         | CDK5R1       | cyclin-dependent kinase 5, regulatory subunit 1 (p35)                                   | -2,856023697                         | 7,39998E-08                       |
|                      |                                                         | CIT          | citron (rho-interacting, serine/threonine kinase 21)                                    | -2,7196239                           | 1,94279E-05                       |
|                      |                                                         | LIMK1        | LIM domain kinase 1                                                                     | -2,446843602                         | 2,62139E-05                       |
|                      |                                                         | LIMK2        | LIM domain kinase 2                                                                     | -1,028411463                         | 0,761874097                       |
|                      |                                                         | MAP3K11      | mitogen-activated protein kinase kinase kinase 11                                       | 1,092101239                          | 0,279951147                       |
|                      |                                                         | MAPK13       | mitogen-activated protein kinase 13                                                     | -1,132843673                         | 0,101824605                       |
|                      |                                                         | MARK2        | MAP/microtubule affinity-regulating kinase 2                                            | -1,602813134                         | 0,00113748                        |
|                      |                                                         | MYLK         | myosin light chain kinase                                                               | -1,796372626                         | 0,000510053                       |
|                      |                                                         | MYLK2        | myosin light chain kinase 2                                                             | -1,036532339                         | 0,818797793                       |
|                      |                                                         | PAK1         | p21 protein (Cdc42/Rac)-activated kinase 1                                              | -3,411655019                         | 1,93631E-06                       |
|                      |                                                         | PAK4         | p21 protein (Cdc42/Rac)-activated kinase 4                                              | 1,192387393                          | 0,054052728                       |
|                      |                                                         | PPP1R12A     | protein phosphatase 1, regulatory subunit 12A                                           | -1,18774202                          | 0,102922005                       |
|                      |                                                         | PPP1R12B     | protein phosphatase 1, regulatory subunit 12B                                           | -2,094004198                         | 1,6679E-06                        |
| PPP3CA               | protein phosphatase 3, catalytic subunit, alpha isozyme | -4,359838933 | 6,14416E-08                                                                             |                                      |                                   |
| PPP3CB               | protein phosphatase 3, catalytic subunit, beta isozyme  | -4,105229363 | 1,18517E-09                                                                             |                                      |                                   |
| ROCK1                | Rho-associated, coiled-coil containing protein kinase 1 | 1,493960786  | 3,52551E-06                                                                             |                                      |                                   |
| SSH1                 | slingshot protein phosphatase 1                         | 1,029327282  | 0,650872594                                                                             |                                      |                                   |
| SSH2                 | slingshot protein phosphatase 2                         | 1,169892989  | 0,277768942                                                                             |                                      |                                   |

Supplementary Table 1 showing Groups, Gene name and values for dataset used in Figure 2

| Group | Sub-Group                                                          | Gene   | Gene Name                                       | Fold change (GSM vs Normal) | p-value (GSM vs Normal)                                            | Fold change (GSM C133 vs Normal C133) | p-value (GSM C133 vs Normal C133) | Fold change (GSM C133 vs Normal C133) | p-value (GSM C133 vs Normal C133) |             |            |
|-------|--------------------------------------------------------------------|--------|-------------------------------------------------|-----------------------------|--------------------------------------------------------------------|---------------------------------------|-----------------------------------|---------------------------------------|-----------------------------------|-------------|------------|
| Actin | Actin                                                              | ACTB   | Actin beta                                      | 1.4264328                   | 0.1729048                                                          | 1.140919                              | 0.8304251                         | 1.3797604                             | 0.2114283                         |             |            |
|       |                                                                    | ACTG1  | Actin gamma 1                                   | 1.1882852                   | 0.749025                                                           | 1.262802                              | 0.4618028                         | 1.217982                              | 0.264677                          |             |            |
|       |                                                                    | ACTA1  | Actin related protein 2/1 complex, subunit 1    | 1.05897756                  | 0.1729048                                                          | 1.1362847                             | 0.5614725                         | 1.5827886                             | 0.121209                          |             |            |
|       |                                                                    | ARPC1  | actin related protein 2/1 complex, subunit 2    | 1.21594813                  | 0.1729048                                                          | 1.21594813                            | 0.1729048                         | 1.4199715                             | 0.1686745                         |             |            |
|       |                                                                    | ARPC2  | actin related protein 2/1 complex, subunit 3    | 1.2897747                   | 0.1729048                                                          | 1.3970752                             | 0.0466445                         | 1.3878153                             | 0.4241307                         |             |            |
|       |                                                                    | ARPC3  | actin related protein 2/1 complex, subunit 4    | 1.282788159                 | 0.1729048                                                          | 1.282788159                           | 0.1729048                         | 1.282788159                           | 0.1729048                         |             |            |
|       |                                                                    | ARPC4  | actin related protein 2/1 complex, subunit 5    | 1.1705644                   | 0.4307282                                                          | 1.07083644                            | 0.87485425                        | 1.1255587                             | 0.3381179                         |             |            |
|       |                                                                    | CDL2   | cell division cycle 2                           | 1.21213717                  | 0.0513759                                                          | 1.21213717                            | 0.0513759                         | 0.969529                              | 0.2025129                         |             |            |
|       |                                                                    | CDL3   | CD242 effector protein (rho GTPase binding 3)   | 1.37689809                  | 0.0014339                                                          | 1.4590424                             | 0.0281682                         | 3.02411686                            | 0.0443504                         |             |            |
|       |                                                                    | COL1A1 | collagen 1 (non-muscle)                         | 1.5981635                   | 0.0046159                                                          | 1.7261729                             | 0.1770092                         | 2.3613036                             | 0.0800196                         |             |            |
| Actin | Actin                                                              | CTNNA1 | catenin (plasma membrane) interacting protein 1 | 2.71276252                  | 0.0007746                                                          | 2.71276252                            | 0.0007746                         | 2.71276252                            | 0.0007746                         |             |            |
|       |                                                                    | CTNNA2 | catenin (plasma membrane) interacting protein 2 | 1.74410254                  | 0.0098185                                                          | 1.5138418                             | 0.2804931                         | 2.0081885                             | 0.1292878                         |             |            |
|       |                                                                    | CTNNA3 | catenin (plasma membrane) interacting protein 3 | 1.04651257                  | 0.1729048                                                          | 1.04651257                            | 0.1729048                         | 1.0855386                             | 0.2624893                         |             |            |
|       |                                                                    | CTNNA4 | catenin (plasma membrane) interacting protein 4 | 1.40866567                  | 0.0513759                                                          | 1.5013263                             | 0.09751562                        | 1.44211289                            | 0.03061673                        |             |            |
|       |                                                                    | CTNNA5 | catenin (plasma membrane) interacting protein 5 | 1.44706412                  | 0.0014339                                                          | 1.44706412                            | 0.0014339                         | 1.63070625                            | 0.24340896                        |             |            |
|       |                                                                    | ESR1   | estrogen receptor                               | 1.60217511                  | 0.0014339                                                          | 1.4310658                             | 0.39710827                        | 1.8004889                             | 0.1340466                         |             |            |
|       |                                                                    | ESR2   | estrogen receptor                               | 1.00029151                  | 0.1729048                                                          | 1.1309898                             | 0.1729048                         | 1.2187455                             | 0.1752598                         |             |            |
|       |                                                                    | IQGAP1 | IQ motif containing GTPase activating protein 1 | 1.44235638                  | 0.2844188                                                          | 1.4025471                             | 0.4865509                         | 1.4847953                             | 0.6830394                         |             |            |
|       |                                                                    | MLK1   | microtubule-actin crosslinking factor 1         | 1.5471721                   | 0.3471727                                                          | 1.4083856                             | 0.9572949                         | 1.0638763                             | 0.2153104                         |             |            |
|       |                                                                    | PRK2   | protein tyrosine kinase 2                       | 1.0587495                   | 0.1729048                                                          | 1.0587495                             | 0.1729048                         | 1.0587495                             | 0.1729048                         |             |            |
| Actin | Actin                                                              | RAF1   | raf-1                                           | 1.23278657                  | 0.14377081                                                         | 1.2810056                             | 0.1377875                         | 2.4807692                             | 0.0222567                         |             |            |
|       |                                                                    | SH2B1  | sh2b domain phosphatase 1                       | 1.43174837                  | 0.2804709                                                          | 1.3957002                             | 0.3128998                         | 1.6207747                             | 0.0324949                         |             |            |
|       |                                                                    | SH3BP1 | sh3 domain phosphatase 2                        | 1.41378956                  | 0.2200493                                                          | 1.4738754                             | 0.4743035                         | 2.7716651                             | 0.5267391                         |             |            |
|       |                                                                    | SH3BP2 | sh3 domain phosphatase 1                        | 1.38051144                  | 0.3037696                                                          | 1.2680775                             | 0.5630073                         | 1.2944158                             | 0.4123091                         |             |            |
|       |                                                                    | WALK1  | Wiskott-Aldrich syndrome like 1                 | 2.4488543                   | 0.0014339                                                          | 2.3776966                             | 0.15700147                        | 1.5385996                             | 0.1582996                         |             |            |
|       |                                                                    | WALK2  | Wiskott-Aldrich syndrome like 2                 | 2.15273747                  | 0.1248217                                                          | 2.7390289                             | 0.15776244                        | 1.6735038                             | 0.6666509                         |             |            |
|       |                                                                    | Actin  | Actin                                           | ARFAP1                      | ARF GAP with RhoGAP domain, ankyrin repeat and PDZ domain 1        | 1.41431311                            | 0.1729048                         | 1.8266584                             | 0.1717705                         | 1.0006889   | 0.9402979  |
|       |                                                                    |        |                                                 | ARHGAP1                     | ADP-ribosylation factor interacting protein 1                      | 1.06744999                            | 0.38339572                        | 1.0341971                             | 0.85109285                        | 1.1772182   | 0.49609279 |
|       |                                                                    |        |                                                 | ARHGAP2                     | Rho GTPase activating protein 2                                    | 1.09743022                            | 0.30073864                        | 1.09743022                            | 0.30073864                        | 1.09743022  | 0.30073864 |
|       |                                                                    |        |                                                 | ARHGAP3                     | Rho guanine nucleotide exchange factor (GEF) 11                    | 1.028719754                           | 0.26180933                        | 1.028719754                           | 0.26180933                        | 1.028719754 | 0.26180933 |
| CAK1  | calcium/calmodulin-dependent serine protein kinase (CaMKII family) |        |                                                 | 1.15181217                  | 0.1451417                                                          | 1.5467199                             | 0.2848377                         | 1.15181217                            | 0.1451417                         |             |            |
| CDCA1 | cell division cycle 1                                              |        |                                                 | 1.21758602                  | 0.0014339                                                          | 1.4972914                             | 0.0466445                         | 1.9984819                             | 0.0443508                         |             |            |
| CDCA2 | CDCA2 binding protein alpha (DMPK-like)                            |        |                                                 | 1.39916335                  | 0.0041569                                                          | 1.7264729                             | 0.1770092                         | 2.3613036                             | 0.0800196                         |             |            |
| CDCA3 | CDCA3                                                              |        |                                                 | 1.17138718                  | 0.1729048                                                          | 1.17138718                            | 0.1729048                         | 1.17138718                            | 0.1729048                         |             |            |
| DLG1  | disheg domain like protein 1                                       |        |                                                 | 1.04651257                  | 0.1729048                                                          | 1.04651257                            | 0.1729048                         | 1.04651257                            | 0.1729048                         |             |            |
| DISP1 | disheg domain like protein 2                                       |        |                                                 | 1.04651257                  | 0.1729048                                                          | 1.04651257                            | 0.1729048                         | 1.04651257                            | 0.1729048                         |             |            |
| Actin | Actin                                                              | EZR    | estrogen receptor                               | 1.44176412                  | 0.0014339                                                          | 1.44176412                            | 0.0014339                         | 1.63070625                            | 0.24340896                        |             |            |
|       |                                                                    | ESR1   | estrogen receptor                               | 1.60217511                  | 0.0014339                                                          | 1.4310658                             | 0.39710827                        | 1.8004889                             | 0.1340466                         |             |            |
|       |                                                                    | ESR2   | estrogen receptor                               | 1.00029151                  | 0.1729048                                                          | 1.1309898                             | 0.1729048                         | 1.2187455                             | 0.1752598                         |             |            |
|       |                                                                    | IQGAP1 | IQ motif containing GTPase activating protein 1 | 1.44235638                  | 0.2844188                                                          | 1.4025471                             | 0.4865509                         | 1.4847953                             | 0.6830394                         |             |            |
|       |                                                                    | MLK1   | microtubule-actin crosslinking factor 1         | 1.5471721                   | 0.3471727                                                          | 1.4083856                             | 0.9572949                         | 1.0638763                             | 0.2153104                         |             |            |
|       |                                                                    | PRK2   | protein tyrosine kinase 2                       | 1.0587495                   | 0.1729048                                                          | 1.0587495                             | 0.1729048                         | 1.0587495                             | 0.1729048                         |             |            |
|       |                                                                    | RAF1   | raf-1                                           | 1.23278657                  | 0.14377081                                                         | 1.2810056                             | 0.1377875                         | 2.4807692                             | 0.0222567                         |             |            |
|       |                                                                    | SH2B1  | sh2b domain phosphatase 1                       | 1.43174837                  | 0.2804709                                                          | 1.3957002                             | 0.3128998                         | 1.6207747                             | 0.0324949                         |             |            |
|       |                                                                    | SH3BP1 | sh3 domain phosphatase 2                        | 1.41378956                  | 0.2200493                                                          | 1.4738754                             | 0.4743035                         | 2.7716651                             | 0.5267391                         |             |            |
|       |                                                                    | SH3BP2 | sh3 domain phosphatase 1                        | 1.38051144                  | 0.3037696                                                          | 1.2680775                             | 0.5630073                         | 1.2944158                             | 0.4123091                         |             |            |
| Actin | Actin                                                              | WALK1  | Wiskott-Aldrich syndrome like 1                 | 2.4488543                   | 0.0014339                                                          | 2.3776966                             | 0.15700147                        | 1.5385996                             | 0.1582996                         |             |            |
|       |                                                                    | WALK2  | Wiskott-Aldrich syndrome like 2                 | 2.15273747                  | 0.1248217                                                          | 2.7390289                             | 0.15776244                        | 1.6735038                             | 0.6666509                         |             |            |
|       |                                                                    | Actin  | Actin                                           | ARFAP1                      | ARF GAP with RhoGAP domain, ankyrin repeat and PDZ domain 1        | 1.41431311                            | 0.1729048                         | 1.8266584                             | 0.1717705                         | 1.0006889   | 0.9402979  |
|       |                                                                    |        |                                                 | ARHGAP1                     | ADP-ribosylation factor interacting protein 1                      | 1.06744999                            | 0.38339572                        | 1.0341971                             | 0.85109285                        | 1.1772182   | 0.49609279 |
|       |                                                                    |        |                                                 | ARHGAP2                     | Rho GTPase activating protein 2                                    | 1.09743022                            | 0.30073864                        | 1.09743022                            | 0.30073864                        | 1.09743022  | 0.30073864 |
|       |                                                                    |        |                                                 | ARHGAP3                     | Rho guanine nucleotide exchange factor (GEF) 11                    | 1.028719754                           | 0.26180933                        | 1.028719754                           | 0.26180933                        | 1.028719754 | 0.26180933 |
|       |                                                                    |        |                                                 | CAK1                        | calcium/calmodulin-dependent serine protein kinase (CaMKII family) | 1.15181217                            | 0.1451417                         | 1.5467199                             | 0.2848377                         | 1.15181217  | 0.1451417  |
|       |                                                                    |        |                                                 | CDCA1                       | cell division cycle 1                                              | 1.21758602                            | 0.0014339                         | 1.4972914                             | 0.0466445                         | 1.9984819   | 0.0443508  |
|       |                                                                    |        |                                                 | CDCA2                       | CDCA2 binding protein alpha (DMPK-like)                            | 1.39916335                            | 0.0041569                         | 1.7264729                             | 0.1770092                         | 2.3613036   | 0.0800196  |
|       |                                                                    |        |                                                 | CDCA3                       | CDCA3                                                              | 1.17138718                            | 0.1729048                         | 1.17138718                            | 0.1729048                         | 1.17138718  | 0.1729048  |
| DLG1  | disheg domain like protein 1                                       |        |                                                 | 1.04651257                  | 0.1729048                                                          | 1.04651257                            | 0.1729048                         | 1.04651257                            | 0.1729048                         |             |            |
| DISP1 | disheg domain like protein 2                                       |        |                                                 | 1.04651257                  | 0.1729048                                                          | 1.04651257                            | 0.1729048                         | 1.04651257                            | 0.1729048                         |             |            |
| Actin | Actin                                                              | EZR    | estrogen receptor                               | 1.44176412                  | 0.0014339                                                          | 1.44176412                            | 0.0014339                         | 1.63070625                            | 0.24340896                        |             |            |
|       |                                                                    | ESR1   | estrogen receptor                               | 1.60217511                  | 0.0014339                                                          | 1.4310658                             | 0.39710827                        | 1.8004889                             | 0.1340466                         |             |            |
|       |                                                                    | ESR2   | estrogen receptor                               | 1.00029151                  | 0.1729048                                                          | 1.1309898                             | 0.1729048                         | 1.2187455                             | 0.1752598                         |             |            |
|       |                                                                    | IQGAP1 | IQ motif containing GTPase activating protein 1 | 1.44235638                  | 0.2844188                                                          | 1.4025471                             | 0.4865509                         | 1.4847953                             | 0.6830394                         |             |            |
|       |                                                                    | MLK1   | microtubule-actin crosslinking factor 1         | 1.5471721                   | 0.3471727                                                          | 1.4083856                             | 0.9572949                         | 1.0638763                             | 0.2153104                         |             |            |
|       |                                                                    | PRK2   | protein tyrosine kinase 2                       | 1.0587495                   | 0.1729048                                                          | 1.0587495                             | 0.1729048                         | 1.0587495                             | 0.1729048                         |             |            |
|       |                                                                    | RAF1   | raf-1                                           | 1.23278657                  | 0.14377081                                                         | 1.2810056                             | 0.1377875                         | 2.4807692                             | 0.0222567                         |             |            |
|       |                                                                    | SH2B1  | sh2b domain phosphatase 1                       | 1.43174837                  | 0.2804709                                                          | 1.3957002                             | 0.3128998                         | 1.6207747                             | 0.0324949                         |             |            |
|       |                                                                    | SH3BP1 | sh3 domain phosphatase 2                        | 1.41378956                  | 0.2200493                                                          | 1.4738754                             | 0.4743035                         | 2.7716651                             | 0.5267391                         |             |            |
|       |                                                                    | SH3BP2 | sh3 domain phosphatase 1                        | 1.38051144                  | 0.3037696                                                          | 1.2680775                             | 0.5630073                         | 1.2944158                             | 0.4123091                         |             |            |
| Actin | Actin                                                              | WALK1  | Wiskott-Aldrich syndrome like 1                 | 2.4488543                   | 0.0014339                                                          | 2.3776966                             | 0.15700147                        | 1.5385996                             | 0.1582996                         |             |            |
|       |                                                                    | WALK2  | Wiskott-Aldrich syndrome like 2                 | 2.15273747                  | 0.1248217                                                          | 2.7390289                             | 0.15776244                        | 1.6735038                             | 0.6666509                         |             |            |
|       |                                                                    | Actin  | Actin                                           | ARFAP1                      | ARF GAP with RhoGAP domain, ankyrin repeat and PDZ domain 1        | 1.41431311                            | 0.1729048                         | 1.8266584                             | 0.1717705                         | 1.0006889   | 0.9402979  |
|       |                                                                    |        |                                                 | ARHGAP1                     | ADP-ribosylation factor interacting protein 1                      | 1.06744999                            | 0.38339572                        | 1.0341971                             | 0.85109285                        | 1.1772182   | 0.49609279 |
|       |                                                                    |        |                                                 | ARHGAP2                     | Rho GTPase activating protein 2                                    | 1.09743022                            | 0.30073864                        | 1.09743022                            | 0.30073864                        | 1.09743022  | 0.30073864 |
|       |                                                                    |        |                                                 | ARHGAP3                     | Rho guanine nucleotide exchange factor (GEF) 11                    | 1.028719754                           | 0.26180933                        | 1.028719754                           | 0.26180933                        | 1.028719754 | 0.26180933 |
|       |                                                                    |        |                                                 | CAK1                        | calcium/calmodulin-dependent serine protein kinase (CaMKII family) | 1.15181217                            | 0.1451417                         | 1.5467199                             | 0.2848377                         | 1.15181217  | 0.1451417  |
|       |                                                                    |        |                                                 | CDCA1                       | cell division cycle 1                                              | 1.21758602                            | 0.0014339                         | 1.4972914                             | 0.0466445                         | 1.9984819   | 0.0443508  |
|       |                                                                    |        |                                                 | CDCA2                       | CDCA2 binding protein alpha (DMPK-like)                            | 1.39916335                            | 0.0041569                         | 1.7264729                             | 0.1770092                         | 2.3613036   | 0.0800196  |
|       |                                                                    |        |                                                 | CDCA3                       | CDCA3                                                              | 1.17138718                            | 0.1729048                         | 1.17138718                            | 0.1729048                         | 1.17138718  | 0.1729048  |
| DLG1  | disheg domain like protein 1                                       |        |                                                 | 1.04651257                  | 0.1729048                                                          | 1.04651257                            | 0.1729048                         | 1.04651257                            | 0.1729048                         |             |            |
| DISP1 | disheg domain like protein 2                                       |        |                                                 | 1.04651257                  | 0.1729048                                                          | 1.04651257                            | 0.1729048                         | 1.04651257                            | 0.1729048                         |             |            |
| Actin | Actin                                                              | EZR    | estrogen receptor                               | 1.44176412                  | 0.0014339                                                          | 1.44176412                            | 0.0014339                         | 1.63070625                            | 0.24340896                        |             |            |
|       |                                                                    | ESR1   | estrogen receptor                               | 1.60217511                  | 0.0014339                                                          | 1.4310658                             | 0.39710827                        | 1.8004889                             | 0.1340466                         |             |            |
|       |                                                                    | ESR2   | estrogen receptor                               | 1.00029151                  | 0.1729048                                                          | 1.1309898                             | 0.1729048                         | 1.2187455                             | 0.1752598                         |             |            |
|       |                                                                    | IQGAP1 | IQ motif containing GTPase activating protein 1 | 1.44235638                  | 0.2844188                                                          | 1.4025471                             | 0.4865509                         | 1.4847953                             | 0.6830394                         |             |            |
|       |                                                                    | MLK1   | microtubule-actin crosslinking factor 1         | 1.5471721                   | 0.3471727                                                          | 1.4083856                             | 0.9572949                         | 1.0638763                             | 0.2153104                         |             |            |
|       |                                                                    | PRK2   | protein tyrosine kinase 2                       | 1.0587495                   | 0.1729048                                                          | 1.0587495                             | 0.1729048                         | 1.0587495                             | 0.1729048                         |             |            |
|       |                                                                    | RAF1   | raf-1                                           | 1.23278657                  | 0.14377081                                                         | 1.2810056                             | 0.1377875                         | 2.4807692                             | 0.0222567                         |             |            |
|       |                                                                    | SH2B1  | sh2b domain phosphatase 1                       | 1.43174837                  | 0.2804709                                                          | 1.3957002                             | 0.3128998                         | 1.6207747                             | 0.0324949                         |             |            |
|       |                                                                    | SH3BP1 | sh3 domain phosphatase 2                        | 1.41378956                  | 0.2200493                                                          | 1.4738754                             | 0.4743035                         | 2.7716651                             | 0.5267391                         |             |            |
|       |                                                                    | SH3BP2 | sh3 domain phosphatase 1                        | 1.38051144                  | 0.3037696                                                          | 1.2680775                             | 0.5630073                         | 1.2944158                             | 0.4123091                         |             |            |
| Actin | Actin                                                              | WALK1  | Wiskott-Aldrich syndrome like 1                 | 2.4488543                   | 0.0014339                                                          | 2.3776966                             | 0.15700147                        | 1.5385996                             | 0.1582996                         |             |            |
|       |                                                                    | WALK2  | Wiskott-Aldrich syndrome like 2                 | 2.15273747                  | 0.1248217                                                          | 2.7390289                             | 0.15776244                        | 1.6735038                             | 0.6666509                         |             |            |
|       |                                                                    | Actin  | Actin                                           | ARFAP1                      | ARF GAP with RhoGAP domain, ankyrin repeat and PDZ domain 1        | 1.41431311                            | 0.1729048                         | 1.8266584                             | 0.1717705                         | 1.0006889   | 0.9402979  |
|       |                                                                    |        |                                                 | ARHGAP1                     | ADP-ribosylation factor interacting protein 1                      | 1.06744999                            | 0.38339572                        | 1.0341971                             | 0.85109285                        | 1.1772182   | 0.49609279 |
|       |                                                                    |        |                                                 | ARHGAP2                     | Rho GTPase activating protein 2                                    | 1.09743022                            | 0.30073864                        | 1.09743022                            | 0.30073864                        | 1.09743022  | 0.30073864 |
|       |                                                                    |        |                                                 | ARHGAP3                     | Rho guanine nucleotide exchange factor (GEF) 11                    | 1.028719754                           | 0.26180933                        | 1.028719754                           | 0.26180933                        | 1.02871     |            |

| Gene       | Protein                                                                              | Accession                                                         | RefSeq                      | UniProt                  | Ensembl                                   | Ensembl                                | Ensembl                                   | Ensembl                                | Ensembl |
|------------|--------------------------------------------------------------------------------------|-------------------------------------------------------------------|-----------------------------|--------------------------|-------------------------------------------|----------------------------------------|-------------------------------------------|----------------------------------------|---------|
| M          | WAPF5                                                                                | WAP5 protein family, member 1                                     | 1,38025144                  | 0.20370936               | 1,36007075                                | 0.56208793                             | 1,39947478                                | 0.44220951                             |         |
|            | WAPL1                                                                                | Wiskott-Aldrich syndrome like                                     | 2,44800312                  | 0.27706666               | 2,37706666                                | 0.56208793                             | 2,12076509                                | 0.18420996                             |         |
|            | AURKA                                                                                | aurora kinase A                                                   | Fold change (GBM vs Normal) | p-paired (GBM vs Normal) | Fold change (GBM CD133+ vs Normal CD133+) | p-paired (GBM CD133+ vs Normal CD133+) | Fold change (GBM CD133+ vs Normal CD133+) | p-paired (GBM CD133+ vs Normal CD133+) |         |
|            | AURKB                                                                                | aurora kinase B                                                   | -1,12520038                 | 0.01622006               | N/A                                       | 0.33042043                             | N/A                                       | 0.01622006                             |         |
|            | CCND3                                                                                | cyclin A1                                                         | -5,4829204                  | 0.00340112               | -1,46792038                               | 0.02862291                             | N/A                                       | 0.02862291                             |         |
|            | CTT                                                                                  | ctnnb1 (cytoskeleton interacting, serine/threonine kinase 2)      | 1,13778113                  | 0.10466205               | 1,20240535                                | 0.41300328                             | 1,06427783                                | 0.20971781                             |         |
|            | CLIP1                                                                                | cytoplasmic linker associated protein 1                           | 1,48148412                  | 0.10818641               | 1,32128625                                | 0.00178251                             | 1,62224485                                | 0.07906677                             |         |
|            | CLIP2                                                                                | cytoplasmic linker associated protein 2                           | 1,33474662                  | 0.04837947               | 1,26342455                                | 0.15720936                             | 1,39697638                                | 0.14603347                             |         |
|            | CLIP3                                                                                | cytoplasmic linker associated protein 3                           | 1,50848163                  | 0.04837947               | 1,36007075                                | 0.12744688                             | 1,79970541                                | 0.29765477                             |         |
|            | MAP2K1                                                                               | CAP-GLY domain containing linker protein 1                        | 1,19697125                  | 0.22477891               | 1,12001188                                | 0.90026235                             | 1,37220525                                | 0.70650282                             |         |
| Cell Cycle | MAP2K2                                                                               | microtubule-associated protein, RFB/FY family, member 1           | 1,64109468                  | 0.18489785               | 1,80594314                                | 0.61476821                             | 1,41573882                                | 0.16270954                             |         |
|            | MAP2K3                                                                               | microtubule-associated protein, RFB/FY family, member 2           | 2,88740718                  | 0.01211169               | 3,33899852                                | 0.14227947                             | 2,58808058                                | 0.01211251                             |         |
|            | AHEF1E2                                                                              | Rho guanine nucleotide exchange factor (GEF) 11                   | Fold change (GBM vs Normal) | p-paired (GBM vs Normal) | Fold change (GBM CD133+ vs Normal CD133+) | p-paired (GBM CD133+ vs Normal CD133+) | Fold change (GBM CD133+ vs Normal CD133+) | p-paired (GBM CD133+ vs Normal CD133+) |         |
|            | AURKB                                                                                | aurora kinase B                                                   | -1,09754022                 | 0.70207864               | -1,08779137                               | 0.86154101                             | -1,58830206                               | 0.06091567                             |         |
|            | AURKC                                                                                | aurora kinase C                                                   | 2,58862785                  | 0.06280706               | 2,74688522                                | 0.26205498                             | 2,39648864                                | 0.20745111                             |         |
|            | SOX1                                                                                 | ectopic factor (dysplasia-inducing factor)                        | 1,54088667                  | 0.10808504               | 1,32612663                                | 0.08712652                             | 1,14622288                                | 0.03005073                             |         |
|            | RACGAP1                                                                              | Rac GTPase activating protein 1                                   | -1,89007976                 | 0.04956474               | -1,57246663                               | 0.45397706                             | -2,52319337                               | 0.13327275                             |         |
|            | ROCK1                                                                                | rho-associated, coiled-coil containing protein kinase 1           | 1,02096413                  | 0.15789055               | 1,07010623                                | 0.10709304                             | 1,11030206                                | 0.12370489                             |         |
|            | CA                                                                                   | BAI1-associated protein 2                                         | Fold change (GBM vs Normal) | p-paired (GBM vs Normal) | Fold change (GBM CD133+ vs Normal CD133+) | p-paired (GBM CD133+ vs Normal CD133+) | Fold change (GBM CD133+ vs Normal CD133+) | p-paired (GBM CD133+ vs Normal CD133+) |         |
|            | BAIAP2                                                                               | BAI1-associated protein 2                                         | 1,74152049                  | 0.19200066               | -1,10314276                               | 0.14250668                             | 1,73699374                                | 0.13889206                             |         |
| MON        | moose                                                                                | 1,76148478                                                        | 0.03262228                  | -1,40429219              | 0.11387802                                | 1,93009148                             | 0.10740606                                |                                        |         |
| NCK1       | NCK adaptor protein 1                                                                | 1,33851216                                                        | 0.15501077                  | 3,70778685               | 0.48292622                                | 2,8437391                              | 0.42914638                                |                                        |         |
| NCK2       | NCK adaptor protein 2                                                                | -1,50500782                                                       | 0.16557717                  | -1,07837541              | 0.79805489                                | -1,13407031                            | 0.64242308                                |                                        |         |
| FAK2       | p121 protein (Cdk4/Rac1)-activated kinase 1                                          | 1,23027815                                                        | 0.15029129                  | 1,41376683               | 0.26432727                                | 1,64156536                             | 0.43863364                                |                                        |         |
| Cell       | Cal                                                                                  | caldesmon 1                                                       | Fold change (GBM vs Normal) | p-paired (GBM vs Normal) | Fold change (GBM CD133+ vs Normal CD133+) | p-paired (GBM CD133+ vs Normal CD133+) | Fold change (GBM CD133+ vs Normal CD133+) | p-paired (GBM CD133+ vs Normal CD133+) |         |
|            | CALD1                                                                                | caldesmon 1                                                       | 8,21937717                  | 0.04301861               | 8,84138881                                | 0.30456658                             | 9,0695678                                 | 0.25023729                             |         |
|            | CALB                                                                                 | calmodulin 1 (highlybasic kinase, delta)                          | 1,89189198                  | 0.01813598               | 1,80939908                                | 0.36100599                             | 1,89951227                                | 0.10309762                             |         |
|            | CKSK                                                                                 | calcium/calmodulin-dependent serine protein kinase (MAGUK Family) | -1,15181127                 | 0.14518712               | -1,54874799                               | 0.28483737                             | 1,1148747                                 | 0.04491718                             |         |
|            | EGAPF                                                                                | IQ motif containing OTFase activating protein 1                   | -1,44220538                 | 0.09256347               | -1,40247165                               | 0.35171457                             | -1,44874763                               | 0.17171738                             |         |
|            | EGAPF2                                                                               | IQ motif containing OTFase activating protein 2                   | 1,34383717                  | 0.28447188               | 1,29827815                                | 0.44885604                             | 1,54972691                                | 0.28002064                             |         |
|            | MYLK                                                                                 | myosin light chain kinase                                         | 1,34383717                  | 0.4517707                | 1,53793238                                | 0.45816119                             | 1,21041481                                | 0.80399416                             |         |
|            | MYLK2                                                                                | myosin light chain kinase 2                                       | 1,37942072                  | 0.26221972               | 1,64848766                                | 0.36572002                             | 1,13807817                                | 0.77984442                             |         |
|            | PPP3CA                                                                               | protein phosphatase 3, catalytic subunit, alpha isotype           | 1,70084132                  | 0.00817184               | 1,70247877                                | 0.23227718                             | 1,71193104                                | 0.16108832                             |         |
|            | PPP3CB                                                                               | protein phosphatase 3, catalytic subunit, beta isotype            | 1,12154751                  | 0.01010876               | 1,41376683                                | 0.01005649                             | 1,64156536                                | 0.01718422                             |         |
| G-Protein  | AMPA1                                                                                | AMPA with RhoGAP domain, interring repeat and PH domain 1         | Fold change (GBM vs Normal) | p-paired (GBM vs Normal) | Fold change (GBM CD133+ vs Normal CD133+) | p-paired (GBM CD133+ vs Normal CD133+) | Fold change (GBM CD133+ vs Normal CD133+) | p-paired (GBM CD133+ vs Normal CD133+) |         |
|            | AMPA2                                                                                | AMPA with RhoGAP domain, interring protein 2                      | 1,41431211                  | 0.14784726               | 1,8286584                                 | 0.17171705                             | 1,00056889                                | 0.09412276                             |         |
|            | ARHGAP1                                                                              | RAP1-ribosylation factor interacting protein 2                    | -1,08744499                 | 0.18330572               | -1,03419371                               | 0.81520625                             | -1,17721482                               | 0.46002329                             |         |
|            | ARHGAP2                                                                              | Rho GTPase activating protein 6                                   | 1,40846276                  | 0.01601831               | 1,21747815                                | 0.12179642                             | 1,71870157                                | 0.19060207                             |         |
|            | ARHGAP29                                                                             | Rho GTPase activating protein 29                                  | N/A                         | N/A                      | N/A                                       | N/A                                    | N/A                                       | N/A                                    |         |
|            | ARHGAP31                                                                             | Rho guanine nucleotide exchange factor (GEF) 11                   | -1,09744522                 | 0.70207864               | -1,08779137                               | 0.86154101                             | -1,58830206                               | 0.06091567                             |         |
|            | CDCK2                                                                                | cell division cycle 2                                             | 1,81792878                  | 0.04662182               | 1,48042993                                | 0.40607024                             | 1,31225245                                | 0.16880831                             |         |
|            | CDCK2L1                                                                              | CDCK2-like nuclear exchange factor (GEF) 11                       | 1,28134504                  | 0.26502706               | 1,0917365                                 | 0.05036007                             | 1,81807128                                | 0.40059236                             |         |
|            | CLL1                                                                                 | collin 1 (non-muscle)                                             | 1,98016185                  | 0.00341629               | 1,72681729                                | 0.17700942                             | 1,36113036                                | 0.04483104                             |         |
|            | CTF                                                                                  | ctnnb1 (cytoskeleton interacting, serine/threonine kinase 2)      | 1,48148412                  | 0.10818641               | 1,32128625                                | 0.01779291                             | 1,62324875                                | 0.07370885                             |         |
| CYFP1      | cytoplasmic FMR1 interacting protein 2                                               | 2,12126202                                                        | 0.09719484                  | 2,71310167               | 0.32261645                                | 2,13228844                             | 0.25610705                                |                                        |         |
| CYFP2      | cytoplasmic FMR1 interacting protein 1                                               | 1,74811024                                                        | 0.01981836                  | 1,51181418               | 0.28044931                                | 2,00810865                             | 0.11294878                                |                                        |         |
| EGAPF1     | EGAPF1-related domain 1                                                              | 1,04641217                                                        | 0.15116817                  | 1,00800706               | 0.44819811                                | 1,08154866                             | 0.26614813                                |                                        |         |
| EGAPF2     | IQ motif containing OTFase activating protein 1                                      | -1,44220538                                                       | 0.09256347                  | -1,40247165              | 0.35171457                                | -1,44874763                            | 0.17171738                                |                                        |         |
| EGAPF3     | IQ motif containing OTFase activating protein 2                                      | 1,32220514                                                        | 0.28447188                  | 1,29827815               | 0.44885604                                | 1,54972691                             | 0.28002064                                |                                        |         |
| LMNK1      | LIM domain kinase 1                                                                  | 1,42415121                                                        | 0.14363303                  | 1,43444425               | 0.40083704                                | 1,43442316                             | 0.39384874                                |                                        |         |
| LMNK2      | LIM domain kinase 2                                                                  | 1,29570348                                                        | 0.10735088                  | 1,07485189               | 0.19193468                                | 1,96398804                             | 0.15702286                                |                                        |         |
| MAPK13     | mitogen-activated protein kinase 13                                                  | 1,12280063                                                        | 0.80734682                  | 1,18730170               | 0.71888281                                | -1,03135313                            | 0.41818668                                |                                        |         |
| NCK1       | rho-associated, coiled-coil substrate 1 (rho family, viral GTP binding protein Rac1) | 1,70715472                                                        | 0.17191112                  | 1,79637973               | 0.15182447                                | 1,63807391                             | 0.15848713                                |                                        |         |
| RACGAP1    | Rac GTPase activating protein 1                                                      | -1,89007976                                                       | 0.04956474                  | -1,57246663              | 0.45397706                                | -2,52319337                            | 0.13327275                                |                                        |         |
| RAC2       | ras homolog family member A                                                          | -1,70996446                                                       | 0.14052817                  | -1,64609615              | 0.43428032                                | -1,79418096                            | 0.14463877                                |                                        |         |
| ROCK1      | rho-associated, coiled-coil containing protein kinase 1                              | 1,02096413                                                        | 0.15789055                  | 1,07010623               | 0.10709304                                | 1,11030206                             | 0.12370489                                |                                        |         |
| TNFRSF1    | T-cell lymphoma invasion and metastasis 1                                            | -2,63730078                                                       | 0.02673111                  | -1,96512579              | 0.31150463                                | -3,49344548                            | 0.07984804                                |                                        |         |
| WNT5       | Wiskott-Aldrich syndrome                                                             | 1,38816041                                                        | 0.44849007                  | 1,14652151               | 0.78770514                                | 2,10582442                             | 0.13513346                                |                                        |         |
| WNT5B      | Wiskott-Aldrich syndrome like                                                        | 2,44880432                                                        | 0.26879333                  | 2,73789666               | 0.52700147                                | 2,12875699                             | 0.18259996                                |                                        |         |
| Kin & Pho  | AURKB                                                                                | aurora kinase B                                                   | Fold change (GBM vs Normal) | p-paired (GBM vs Normal) | Fold change (GBM CD133+ vs Normal CD133+) | p-paired (GBM CD133+ vs Normal CD133+) | Fold change (GBM CD133+ vs Normal CD133+) | p-paired (GBM CD133+ vs Normal CD133+) |         |
|            | AURKA                                                                                | aurora kinase A                                                   | -2,13250038                 | 0.01622006               | -1,54614125                               | 0.33042043                             | -3,06121249                               | 0.01622006                             |         |
|            | AURKC                                                                                | aurora kinase C                                                   | N/A                         | N/A                      | N/A                                       | N/A                                    | N/A                                       | N/A                                    |         |
|            | CKSK                                                                                 | calcium/calmodulin-dependent serine protein kinase (MAGUK Family) | 2,58862785                  | 0.02821705               | 2,74688522                                | 0.26205498                             | 2,39648864                                | 0.20745111                             |         |
|            | CDK20A                                                                               | CDK2 binding protein kinase alpha (DMPK-like)                     | 1,15181127                  | 0.14518712               | 1,54874799                                | 0.28483737                             | 1,1148747                                 | 0.04491718                             |         |
|            | CKK1                                                                                 | cyclin-dependent kinase 5                                         | 1,21738892                  | 0.17131811               | 1,49729314                                | 0.34540592                             | 1,09848519                                | 0.42408585                             |         |
|            | CKK2                                                                                 | cyclin-dependent kinase 2                                         | 1,44779133                  | 0.24130911               | 1,63841179                                | 0.40346645                             | 1,25733821                                | 0.11613101                             |         |
|            | CKK3L1                                                                               | cyclin-dependent kinase 5, regulatory subunit 1 (p35)             | 2,33793447                  | 0.03630996               | 1,59849882                                | 0.19708803                             | 3,68502821                                | 0.20490469                             |         |
|            | CTT                                                                                  | ctnnb1 (cytoskeleton interacting, serine/threonine kinase 2)      | 1,48148412                  | 0.10818641               | 1,32128625                                | 0.01779291                             | 1,62324875                                | 0.07370885                             |         |
|            | LMNK1                                                                                | LIM domain kinase 1                                               | 1,42415121                  | 0.14363303               | 1,43444425                                | 0.40083704                             | 1,43442316                                | 0.39384874                             |         |
| LMNK2      | LIM domain kinase 2                                                                  | 1,29570348                                                        | 0.10735088                  | 1,07485189               | 0.19193468                                | 1,96398804                             | 0.15702286                                |                                        |         |
| MAPK11     | mitogen-activated protein kinase kinase 11                                           | 2,3641907                                                         | 0.20268087                  | 1,81310451               | 0.49110429                                | 2,9310671                              | 0.44916566                                |                                        |         |
| MAPK12     | mitogen-activated protein kinase 12                                                  | 1,12280063                                                        | 0.80734682                  | 1,18730170               | 0.71888281                                | -1,03135313                            | 0.41818668                                |                                        |         |
| MAPK13     | MAP3/interleukin-6/erythropoietin kinase 2                                           | 2,04936646                                                        | 0.18558074                  | 1,79713471               | 0.51913852                                | 2,38894073                             | 0.44002064                                |                                        |         |
| MYLK       | myosin light chain kinase                                                            | 1,34383717                                                        | 0.4517707                   | 1,53793238               | 0.45816119                                | 1,21041481                             | 0.80399416                                |                                        |         |
| MYLK2      | myosin light chain kinase 2                                                          | 1,37942072                                                        | 0.26221972                  | 1,64848766               | 0.36572002                                | 1,13807817                             | 0.77984442                                |                                        |         |
| PAK1       | p21 protein (Cdk4/Rac1)-activated kinase 1                                           | 2,19257815                                                        | 0.15092127                  | 2,16847292               | 0.41510394                                | 2,64072757                             | 0.42885364                                |                                        |         |
| PAK2       | p21 protein (Cdk4/Rac1)-activated kinase 2                                           | 1,24043126                                                        | 0.10453164                  | 1,2773682                | 0.3129191                                 | 1,22912262                             | 0.17370955                                |                                        |         |
| PPP3CA     | protein phosphatase 3, catalytic subunit, alpha isotype                              | 1,70084132                                                        | 0.00817184                  | 1,70247877               | 0.23227718                                | 1,71193104                             | 0.16108832                                |                                        |         |
| PPP3CB     | protein phosphatase 3, catalytic subunit, beta isotype                               | 1,12154751                                                        | 0.01010876                  | 1,41376683               | 0.01005649                                | 1,64156536                             | 0.01718422                                |                                        |         |
| ROCK1      | rho-associated, coiled-coil containing protein kinase 1                              | 1,02096413                                                        | 0.15789055                  | 1,07010623               | 0.10709304                                | 1,11030206                             | 0.12370489                                |                                        |         |
| SH3        | SH3 domain protein phosphatase 1                                                     | 1,41347837                                                        | 0.11094812                  | 1,41376683               | 0.11094812                                | 1,62207409                             | 0.15128988                                |                                        |         |
| SH3L1      | SH3 domain protein phosphatase 2                                                     | 1,41376683                                                        | 0.22004293                  | 1,41376683               | 0.47493764                                | 1,62207409                             | 0.15128988                                |                                        |         |

**Supplementary Table 1 showing Groups, Gene name and values for dataset used in Figure 3**

| Group           | Subgroup                                                                                | Gene            | Gene Name                                                                         | Fold change (Stem v Differentiation) | p-paired (Stem v Differentiation)                      |              |                                                     |              |                                                       |              |             |
|-----------------|-----------------------------------------------------------------------------------------|-----------------|-----------------------------------------------------------------------------------|--------------------------------------|--------------------------------------------------------|--------------|-----------------------------------------------------|--------------|-------------------------------------------------------|--------------|-------------|
| Actin Filaments | IP                                                                                      | ACTR2           | ARP2 actin-related protein 2 homolog (yeast)                                      | -1,503602234                         | 0,351306589                                            |              |                                                     |              |                                                       |              |             |
|                 |                                                                                         | ACTR3           | ARP3 actin-related protein 3 homolog (yeast)                                      | -1,364659104                         | 0,045988538                                            |              |                                                     |              |                                                       |              |             |
|                 |                                                                                         | ARPC1B          | Actin Related Protein 2/3 Complex, Subunit 1B                                     | -2,035619024                         | 0,233502008                                            |              |                                                     |              |                                                       |              |             |
|                 |                                                                                         | ARPC2           | actin related protein 2/3 complex, subunit 2. 34kDa                               | -1,519073566                         | 0,068624421                                            |              |                                                     |              |                                                       |              |             |
|                 |                                                                                         | ARPC3           | actin related protein 2/3 complex, subunit 3. 21kDa                               | -1,246892199                         | 0,136944137                                            |              |                                                     |              |                                                       |              |             |
|                 |                                                                                         | ARPC4           | actin related protein 2/3 complex, subunit 4. 20kDa                               | 1,039243684                          | 0,903294477                                            |              |                                                     |              |                                                       |              |             |
|                 |                                                                                         | ARPC5           | actin related protein 2/3 complex, subunit 5. 16kDa                               | -1,242616715                         | 0,653671905                                            |              |                                                     |              |                                                       |              |             |
|                 |                                                                                         | CALD1           | Caldesmon 1                                                                       | -1,856108445                         | 0,14922611                                             |              |                                                     |              |                                                       |              |             |
|                 |                                                                                         | CDC42EP3        | CDC42 Effector Protein (Rho GTPase Binding) 3                                     | -1,861738951                         | 0,246473074                                            |              |                                                     |              |                                                       |              |             |
|                 |                                                                                         | CFL1            | cofilin 1 (non-muscle)                                                            | -1,136897626                         | 0,40051435                                             |              |                                                     |              |                                                       |              |             |
|                 |                                                                                         | CYFIP1          | cytoplasmic FMR1 interacting protein 1                                            | 1,137896182                          | 0,681131705                                            |              |                                                     |              |                                                       |              |             |
|                 |                                                                                         | CYFIP2          | cytoplasmic FMR1 interacting protein 2                                            | 1,596264494                          | 0,543958341                                            |              |                                                     |              |                                                       |              |             |
|                 |                                                                                         | DIAPH1          | diaphanous-related formin 1                                                       | 1,007075561                          | 0,952344888                                            |              |                                                     |              |                                                       |              |             |
|                 |                                                                                         | DSTN            | destrin (actin depolymerizing factor)                                             | -1,408392969                         | 0,077267785                                            |              |                                                     |              |                                                       |              |             |
|                 |                                                                                         | EZR             | ezrin                                                                             | -1,596251198                         | 0,334766835                                            |              |                                                     |              |                                                       |              |             |
|                 |                                                                                         | FSCN2           | fascin homolog 2, actin-bundling protein, retinal (Strongylocentrotus purpuratus) | -1,257740252                         | 0,099187828                                            |              |                                                     |              |                                                       |              |             |
|                 |                                                                                         | GSN             | gelsolin                                                                          | -1,319072362                         | 0,394984075                                            |              |                                                     |              |                                                       |              |             |
|                 |                                                                                         | IQGAP2          | IQ Motif Containing GTPase Activating Protein 2                                   | -1,277927816                         | 0,483096003                                            |              |                                                     |              |                                                       |              |             |
|                 |                                                                                         | MACF1           | Microtubule-Actin Crosslinking Factor 1                                           | 1,23177917                           | 0,449561642                                            |              |                                                     |              |                                                       |              |             |
|                 |                                                                                         | PFN2            | profilin 2                                                                        | -1,095099233                         | 0,705155655                                            |              |                                                     |              |                                                       |              |             |
|                 |                                                                                         | RDX             | radixin                                                                           | -2,038936169                         | 0,455088797                                            |              |                                                     |              |                                                       |              |             |
|                 |                                                                                         | SSH1            | slingshot protein phosphatase 1                                                   | -1,040441469                         | 0,934539012                                            |              |                                                     |              |                                                       |              |             |
|                 |                                                                                         | SSH2            | slingshot protein phosphatase 2                                                   | -1,40249594                          | 0,018442329                                            |              |                                                     |              |                                                       |              |             |
|                 |                                                                                         | WASF1           | WAS protein family, member 1                                                      | 1,328340735                          | 0,514233374                                            |              |                                                     |              |                                                       |              |             |
|                 |                                                                                         | WASL            | Wiskott-Aldrich syndrome-like                                                     | 1,114032853                          | 0,839941625                                            |              |                                                     |              |                                                       |              |             |
|                 |                                                                                         | VASP            | vasodilator-stimulated phosphoprotein                                             | -2,088668126                         | 0,257062298                                            |              |                                                     |              |                                                       |              |             |
| Actin Filaments | OR                                                                                      | ARAP1           | ArfGAP with RhoGAP domain, ankyrin repeat and PH domain 1                         | -1,236389918                         | 0,353293392                                            |              |                                                     |              |                                                       |              |             |
|                 |                                                                                         | ARFIP2          | ADP-ribosylation factor interacting protein 2                                     | -1,234152222                         | 0,155549477                                            |              |                                                     |              |                                                       |              |             |
|                 |                                                                                         | ARHGDI8         | Rho GDP Dissociation Inhibitor (GDI) Beta                                         | N/A                                  | N/A                                                    |              |                                                     |              |                                                       |              |             |
|                 |                                                                                         | ARHGGEF1        | Rho guanine nucleotide exchange factor (GEF) 11                                   | 1,157847151                          | 0,028047868                                            |              |                                                     |              |                                                       |              |             |
|                 |                                                                                         | ARPC4           | actin related protein 2/3 complex, subunit 4. 20kDa                               | 1,039243684                          | 0,903294477                                            |              |                                                     |              |                                                       |              |             |
|                 |                                                                                         | CASK            | calcium/calmodulin-dependent serine protein kinase (MAGUK family)                 | 1,211771774                          | 0,451319174                                            |              |                                                     |              |                                                       |              |             |
|                 |                                                                                         | CDC42           | cell division cycle 42                                                            | -3,098634622                         | 0,377793227                                            |              |                                                     |              |                                                       |              |             |
|                 |                                                                                         | CDC42BPA        | CDC42 binding protein kinase alpha (DMPK-like)                                    | -1,268682948                         | 0,54196111                                             |              |                                                     |              |                                                       |              |             |
|                 |                                                                                         | CFL1            | cofilin 1 (non-muscle)                                                            | -1,136897626                         | 0,40051435                                             |              |                                                     |              |                                                       |              |             |
|                 |                                                                                         | CRK             | v-crk sarcoma virus CT10 oncogene homolog (avian)                                 | 1,123194942                          | 0,38316088                                             |              |                                                     |              |                                                       |              |             |
|                 |                                                                                         | DIAPH1          | diaphanous-related formin 1                                                       | 1,007075561                          | 0,952344888                                            |              |                                                     |              |                                                       |              |             |
|                 |                                                                                         | DSTN            | destrin (actin depolymerizing factor)                                             | -1,408392969                         | 0,077267785                                            |              |                                                     |              |                                                       |              |             |
|                 |                                                                                         | EZR             | ezrin                                                                             | -1,596251198                         | 0,334766835                                            |              |                                                     |              |                                                       |              |             |
|                 |                                                                                         | FSCN2           | fascin homolog 2, actin-bundling protein, retinal (Strongylocentrotus purpuratus) | -1,257740252                         | 0,099187828                                            |              |                                                     |              |                                                       |              |             |
|                 |                                                                                         | GSN             | gelsolin                                                                          | -1,319072362                         | 0,394984075                                            |              |                                                     |              |                                                       |              |             |
|                 |                                                                                         | IQGAP1          | IQ motif containing GTPase activating protein 1                                   | -1,550087076                         | 0,144930732                                            |              |                                                     |              |                                                       |              |             |
|                 |                                                                                         | LIMK1           | LIM domain kinase 1                                                               | -1,12698585                          | 0,241706114                                            |              |                                                     |              |                                                       |              |             |
|                 |                                                                                         | LIMK2           | LIM domain kinase 2                                                               | -1,519073566                         | 0,302910245                                            |              |                                                     |              |                                                       |              |             |
|                 |                                                                                         | NCK1            | NCK adaptor protein 1                                                             | 1,217411578                          | 0,275239235                                            |              |                                                     |              |                                                       |              |             |
|                 |                                                                                         | PFN2            | profilin 2                                                                        | -1,095099233                         | 0,705155655                                            |              |                                                     |              |                                                       |              |             |
|                 |                                                                                         | RDX             | radixin                                                                           | -2,038936169                         | 0,455088797                                            |              |                                                     |              |                                                       |              |             |
|                 |                                                                                         | RHOA            | ras homolog family member A                                                       | 1,024025274                          | 0,930295928                                            |              |                                                     |              |                                                       |              |             |
|                 |                                                                                         | ROCK1           | Rho-associated, coiled-coil containing protein kinase 1                           | 1,031891352                          | 0,838245327                                            |              |                                                     |              |                                                       |              |             |
|                 |                                                                                         | SSH1            | slingshot protein phosphatase 1                                                   | -1,040441469                         | 0,934539012                                            |              |                                                     |              |                                                       |              |             |
|                 |                                                                                         | SSH2            | slingshot protein phosphatase 2                                                   | -1,40249594                          | 0,018442329                                            |              |                                                     |              |                                                       |              |             |
|                 |                                                                                         | Actin Filaments | P-D                                                                               | ACTR3                                | ARP3 actin-related protein 3 homolog (yeast)           | -1,364659104 | 0,045988538                                         |              |                                                       |              |             |
| ARHGAP6         | Rho GTPase activating protein 6                                                         |                 |                                                                                   | 4,041287117                          | 0,269730554                                            |              |                                                     |              |                                                       |              |             |
| ARPC1B          | actin related protein 2/3 complex, subunit 1B. 41kDa                                    |                 |                                                                                   | -2,035619024                         | 0,233502008                                            |              |                                                     |              |                                                       |              |             |
| ARPC2           | actin related protein 2/3 complex, subunit 2. 34kDa                                     |                 |                                                                                   | -1,519073566                         | 0,068624421                                            |              |                                                     |              |                                                       |              |             |
| ARPC3           | actin related protein 2/3 complex, subunit 3. 21kDa                                     |                 |                                                                                   | -1,246892199                         | 0,136944137                                            |              |                                                     |              |                                                       |              |             |
| ARPC4           | actin related protein 2/3 complex, subunit 4. 20kDa                                     |                 |                                                                                   | 1,039243684                          | 0,903294477                                            |              |                                                     |              |                                                       |              |             |
| ARPC5           | actin related protein 2/3 complex, subunit 5. 16kDa                                     |                 |                                                                                   | -1,242616715                         | 0,653671905                                            |              |                                                     |              |                                                       |              |             |
| CDC42EP2        | CDC42 effector protein (Rho GTPase binding) 2                                           |                 |                                                                                   | -1,494002645                         | 0,079772878                                            |              |                                                     |              |                                                       |              |             |
| DSTN            | destrin (actin depolymerizing factor)                                                   |                 |                                                                                   | -1,408392969                         | 0,077267785                                            |              |                                                     |              |                                                       |              |             |
| FNBP1L          | formin binding protein 1-like                                                           |                 |                                                                                   | 1,392401921                          | 0,371224511                                            |              |                                                     |              |                                                       |              |             |
| GSN             | gelsolin                                                                                |                 |                                                                                   | -1,319072362                         | 0,394984075                                            |              |                                                     |              |                                                       |              |             |
| NCK1            | NCK adaptor protein 1                                                                   |                 |                                                                                   | 1,217411578                          | 0,275239235                                            |              |                                                     |              |                                                       |              |             |
| NCK2            | NCK adaptor protein 2                                                                   |                 |                                                                                   | 1,361239843                          | 0,471943662                                            |              |                                                     |              |                                                       |              |             |
| PFN2            | profilin 2                                                                              |                 |                                                                                   | -1,095099233                         | 0,705155655                                            |              |                                                     |              |                                                       |              |             |
| PIKFYVE         | phosphoinositide kinase, FYVE finger containing                                         |                 |                                                                                   | 1,019008089                          | 0,79111798                                             |              |                                                     |              |                                                       |              |             |
| RAC1            | ras-related C3 botulinum toxin substrate 1 (rho family, small GTP binding protein Rac1) |                 |                                                                                   | 1,188269816                          | 0,45114209                                             |              |                                                     |              |                                                       |              |             |
| WAS             | Wiskott-Aldrich syndrome                                                                |                 |                                                                                   | -1,213942957                         | 0,344056056                                            |              |                                                     |              |                                                       |              |             |
| WASF1           | WAS protein family, member 1                                                            |                 |                                                                                   | 1,328340735                          | 0,514233374                                            |              |                                                     |              |                                                       |              |             |
| WASL            | Wiskott-Aldrich syndrome-like                                                           |                 |                                                                                   | 1,114032853                          | 0,839941625                                            |              |                                                     |              |                                                       |              |             |
| Microtubules    | CC                                                                                      |                 |                                                                                   | ARFIP2                               | ADP-ribosylation factor interacting protein 2          | -1,234152222 | 0,155549477                                         |              |                                                       |              |             |
|                 |                                                                                         |                 |                                                                                   | CLASP1                               | cytoplasmic linker associated protein 1                | 1,061998045  | 0,868801082                                         |              |                                                       |              |             |
|                 |                                                                                         |                 |                                                                                   | CTTN                                 | cortactin                                              | -1,311864269 | 0,031778958                                         |              |                                                       |              |             |
|                 |                                                                                         |                 |                                                                                   | DSTN                                 | destrin (actin depolymerizing factor)                  | -1,408392969 | 0,077267785                                         |              |                                                       |              |             |
|                 |                                                                                         |                 |                                                                                   | EZR                                  | ezrin                                                  | -1,596251198 | 0,334766835                                         |              |                                                       |              |             |
|                 |                                                                                         |                 |                                                                                   | LLGL1                                | lethal giant larvae homolog 1 (Drosophila)             | -1,128544056 | 0,269171582                                         |              |                                                       |              |             |
|                 |                                                                                         |                 |                                                                                   | MAPRE1                               | microtubule-associated protein, RP/EB family, member 1 | -1,037168917 | 0,908769208                                         |              |                                                       |              |             |
|                 |                                                                                         | Microtubules    | IP                                                                                | CLASP1                               | cytoplasmic linker associated protein 1                | 1,061998045  | 0,868801082                                         |              |                                                       |              |             |
|                 |                                                                                         |                 |                                                                                   | CLASP2                               | cytoplasmic linker associated protein 2                | 2,834464354  | 0,157080972                                         |              |                                                       |              |             |
|                 |                                                                                         |                 |                                                                                   | CLIP1                                | CAP-GLY domain containing linker protein 1             | 1,345938836  | 0,336549573                                         |              |                                                       |              |             |
|                 |                                                                                         |                 |                                                                                   | CLIP2                                | CAP-GLY domain containing linker protein 2             | 1,399518962  | 0,497165165                                         |              |                                                       |              |             |
|                 |                                                                                         |                 |                                                                                   | MACF1                                | microtubule-actin crosslinking factor 1                | 1,23177917   | 0,449561642                                         |              |                                                       |              |             |
|                 |                                                                                         |                 |                                                                                   | MAP4                                 | microtubule-associated protein 4                       | -1,073879882 | 0,756696819                                         |              |                                                       |              |             |
|                 |                                                                                         |                 |                                                                                   | MAPRE1                               | microtubule-associated protein, RP/EB family, member 1 | -1,037168917 | 0,908769208                                         |              |                                                       |              |             |
|                 |                                                                                         |                 |                                                                                   | MAPRE2                               | microtubule-associated protein, RP/EB family, member 2 | 1,112404355  | 0,655329185                                         |              |                                                       |              |             |
|                 |                                                                                         |                 |                                                                                   | MAPT                                 | microtubule-associated protein tau                     | 3,070129918  | 0,107065844                                         |              |                                                       |              |             |
|                 |                                                                                         |                 |                                                                                   | MID1                                 | midline 1 (Optiz/BBB syndrome)                         | 1,118441587  | 0,730462803                                         |              |                                                       |              |             |
|                 |                                                                                         |                 |                                                                                   | RACGAP1                              | Rac GTPase activating protein 1                        | -1,154046397 | 0,438821409                                         |              |                                                       |              |             |
|                 |                                                                                         |                 |                                                                                   | STMN1                                | stathmin 1                                             | -1,493790433 | 0,098942573                                         |              |                                                       |              |             |
|                 |                                                                                         |                 |                                                                                   | Microtubules                         | OR                                                     | CLASP1       | cytoplasmic linker associated protein 1             | 1,061998045  | 0,868801082                                           |              |             |
|                 |                                                                                         |                 |                                                                                   |                                      |                                                        | MAPT         | microtubule-associated protein tau                  | 3,070129918  | 0,107065844                                           |              |             |
|                 |                                                                                         |                 |                                                                                   |                                      |                                                        | MID1         | midline 1 (Optiz/BBB syndrome)                      | 1,118441587  | 0,730462803                                           |              |             |
|                 |                                                                                         |                 |                                                                                   |                                      |                                                        | PHLD82       | pleckstrin homology-like domain, family B, member 2 | 1,128441515  | 0,047595136                                           |              |             |
|                 |                                                                                         |                 |                                                                                   |                                      |                                                        | STMN1        | stathmin 1                                          | -1,493790433 | 0,098942573                                           |              |             |
|                 |                                                                                         |                 |                                                                                   |                                      |                                                        | Microtubules | P-D                                                 | CLASP1       | cytoplasmic linker associated protein 1               | 1,061998045  | 0,868801082 |
|                 |                                                                                         |                 |                                                                                   |                                      |                                                        |              |                                                     | CLASP2       | cytoplasmic linker associated protein 2               | 2,834464354  | 0,157080972 |
| MAP4            | microtubule-associated protein 4                                                        |                 |                                                                                   |                                      |                                                        |              |                                                     | -1,073879882 | 0,756696819                                           |              |             |
| MAPRE1          | microtubule-associated protein, RP/EB family, member 1                                  |                 |                                                                                   |                                      |                                                        |              |                                                     | -1,037168917 | 0,908769208                                           |              |             |
| MAPRE2          | microtubule-associated protein, RP/EB family, member 2                                  |                 |                                                                                   |                                      |                                                        |              |                                                     | 1,112404355  | 0,655329185                                           |              |             |
| MAPT            | microtubule-associated protein tau                                                      |                 |                                                                                   |                                      |                                                        |              |                                                     | 3,070129918  | 0,107065844                                           |              |             |
| STMN1           | stathmin 1                                                                              |                 |                                                                                   |                                      |                                                        |              |                                                     | -1,493790433 | 0,098942573                                           |              |             |
| Microtubules    | SP                                                                                      |                 |                                                                                   |                                      |                                                        |              |                                                     | AURKA        | aurora kinase A                                       | -2,0000549   | 0,089832412 |
|                 |                                                                                         |                 |                                                                                   |                                      |                                                        |              |                                                     | AURKB        | aurora kinase B                                       | N/A          | N/A         |
|                 |                                                                                         | CLASP1          | cytoplasmic linker associated protein 1                                           |                                      |                                                        |              |                                                     | 1,061998045  | 0,868801082                                           |              |             |
|                 |                                                                                         | CLASP2          | cytoplasmic linker associated protein 2                                           |                                      |                                                        |              |                                                     | 2,834464354  | 0,157080972                                           |              |             |
|                 |                                                                                         | CLIP1           | CAP-GLY domain containing linker protein 1                                        |                                      |                                                        |              |                                                     | 1,345938836  | 0,336549573                                           |              |             |
|                 |                                                                                         | MAPRE1          | microtubule-associated protein, RP/EB family, member 1                            |                                      |                                                        |              |                                                     | -1,037168917 | 0,908769208                                           |              |             |
|                 |                                                                                         | RACGAP1         | Rac GTPase activating protein 1                                                   |                                      |                                                        |              |                                                     | -1,154046397 | 0,438821409                                           |              |             |
|                 |                                                                                         | Microtubules    | AX                                                                                |                                      |                                                        |              |                                                     | BAIAP2       | BAI1-associated protein 2                             | -1,621716993 | 0,0484634   |
|                 |                                                                                         |                 |                                                                                   |                                      |                                                        |              |                                                     | CDK5         | cyclin-dependent kinase 5                             | -1,133171035 | 0,339107101 |
|                 |                                                                                         |                 |                                                                                   |                                      |                                                        |              |                                                     | CDK5R1       | cyclin-dependent kinase 5, regulatory subunit 1 (p35) | 5,676197133  | 0,155534829 |

|             |                                                                                         |              |                                                                                         |                                                                                         |                                                         |              |                           |
|-------------|-----------------------------------------------------------------------------------------|--------------|-----------------------------------------------------------------------------------------|-----------------------------------------------------------------------------------------|---------------------------------------------------------|--------------|---------------------------|
| Projections | FL                                                                                      | CYFIP1       | cytoplasmic FMR1 interacting protein 1                                                  | 1,137896182                                                                             | 0,681131705                                             |              |                           |
|             |                                                                                         | CYFIP2       | cytoplasmic FMR1 interacting protein 2                                                  | 1,596264494                                                                             | 0,543958341                                             |              |                           |
|             |                                                                                         | MAPT         | microtubule-associated protein tau                                                      | 3,070129918                                                                             | 0,107065844                                             |              |                           |
|             | G                                                                                       | FL           | ARAP1                                                                                   |                                                                                         | -1,236389918                                            | 0,352939392  |                           |
|             |                                                                                         |              | BAIAP2                                                                                  | BAI1-associated protein 2                                                               | -1,621176993                                            | 0,0484634    |                           |
|             |                                                                                         |              | CDC42                                                                                   | cell division cycle 42                                                                  | -3,098634622                                            | 0,377793227  |                           |
|             |                                                                                         |              | CDK5                                                                                    | cyclin-dependent kinase 5                                                               | -1,133171035                                            | 0,339107101  |                           |
|             |                                                                                         |              | EZR                                                                                     | ezrin                                                                                   | -1,596251198                                            | 0,334766835  |                           |
|             |                                                                                         |              | MSN                                                                                     | moesin                                                                                  | -1,28585033                                             | 0,099852236  |                           |
|             |                                                                                         |              | RDX                                                                                     | radixin                                                                                 | -2,038936169                                            | 0,455088797  |                           |
|             | LAM                                                                                     | G            | CDK5                                                                                    | cyclin-dependent kinase 5                                                               | -1,133171035                                            | 0,339107101  |                           |
|             |                                                                                         |              | CDK5R1                                                                                  | cyclin-dependent kinase 5, regulatory subunit 1 (p35)                                   | 5,676197133                                             | 0,155534829  |                           |
|             |                                                                                         |              | MAPT                                                                                    | microtubule-associated protein tau                                                      | 3,070129918                                             | 0,107065844  |                           |
|             | MV                                                                                      | LAM          | ACTR3                                                                                   | ARP3 actin-related protein 3 homolog (yeast)                                            | -1,364659104                                            | 0,045988538  |                           |
|             |                                                                                         |              | ARFIP2                                                                                  | ADP-ribosylation factor interacting protein 2                                           | -1,234152222                                            | 0,155549477  |                           |
|             |                                                                                         |              | ARPC5                                                                                   | actin related protein 2/3 complex, subunit 5, 16kDa                                     | -1,242616715                                            | 0,652671905  |                           |
|             |                                                                                         |              | CDK5                                                                                    | cyclin-dependent kinase 5                                                               | -1,133171035                                            | 0,339107101  |                           |
|             |                                                                                         |              | CTTN                                                                                    | cortactin                                                                               | -1,311864269                                            | 0,031778958  |                           |
|             |                                                                                         |              | CYFIP1                                                                                  | cytoplasmic FMR1 interacting protein 1                                                  | 1,137896182                                             | 0,681131705  |                           |
|             |                                                                                         |              | CYFIP2                                                                                  | cytoplasmic FMR1 interacting protein 2                                                  | 1,596264494                                             | 0,543958341  |                           |
|             |                                                                                         |              | NCK1                                                                                    | NCK adaptor protein 1                                                                   | 1,217411578                                             | 0,275239235  |                           |
|             |                                                                                         |              | PPP1R12A                                                                                | protein phosphatase 1, regulatory subunit 12A                                           | -1,409612442                                            | 0,460024068  |                           |
|             |                                                                                         |              | PPP1R12B                                                                                | protein phosphatase 1, regulatory subunit 12B                                           | -1,036232149                                            | 0,822408557  |                           |
|             |                                                                                         |              | RAC1                                                                                    | ras-related C3 botulinum toxin substrate 1 (rho family, small GTP binding protein Rac1) | 1,188269816                                             | 0,45114209   |                           |
|             |                                                                                         |              | RDX                                                                                     | radixin                                                                                 | -2,038936169                                            | 0,455088797  |                           |
|             |                                                                                         |              | WASL                                                                                    | Wiskott-Aldrich syndrome-like                                                           | 1,114032853                                             | 0,839941625  |                           |
|             |                                                                                         |              | P                                                                                       | MV                                                                                      | EZR                                                     | ezrin        | -1,596251198              |
| MSN         | moesin                                                                                  | -1,28585033  |                                                                                         |                                                                                         | 0,099852236                                             |              |                           |
| RDX         | radixin                                                                                 | -2,038936169 |                                                                                         |                                                                                         | 0,455088797                                             |              |                           |
| RF          | P                                                                                       | CDC42        | cell division cycle 42                                                                  | -3,098634622                                                                            | 0,377793227                                             |              |                           |
|             |                                                                                         | CDC42EP2     | CDC42 effector protein (Rho GTPase binding) 2                                           | -1,494002645                                                                            | 0,079772878                                             |              |                           |
| CS-S-P      | RF                                                                                      | ARFIP2       | ADP-ribosylation factor interacting protein 2                                           | -1,234152222                                                                            | 0,155549477                                             |              |                           |
|             |                                                                                         | CTTN         | cortactin                                                                               | -1,311864269                                                                            | 0,031778958                                             |              |                           |
|             |                                                                                         | CYFIP1       | cytoplasmic FMR1 interacting protein 1                                                  | 1,137896182                                                                             | 0,681131705                                             |              |                           |
|             |                                                                                         | CYFIP2       | cytoplasmic FMR1 interacting protein 2                                                  | 1,596264494                                                                             | 0,543958341                                             |              |                           |
|             |                                                                                         | EZR          | ezrin                                                                                   | -1,596251198                                                                            | 0,334766835                                             |              |                           |
|             |                                                                                         | RAC1         | ras-related C3 botulinum toxin substrate 1 (rho family, small GTP binding protein Rac1) | 1,188269816                                                                             | 0,45114209                                              |              |                           |
| CMM         | CS-S-P                                                                                  | RDX          | radixin                                                                                 | -2,038936169                                                                            | 0,455088797                                             |              |                           |
|             |                                                                                         | ARAP1        | ArfGAP with RhoGAP domain, ankyrin repeat and PH domain 1                               | -1,236389918                                                                            | 0,352939392                                             |              |                           |
|             |                                                                                         | ARHGEF11     | Rho guanine nucleotide exchange factor (GEF) 11                                         | 1,157847151                                                                             | 0,032047868                                             |              |                           |
|             |                                                                                         | CDC42        | cell division cycle 42                                                                  | -3,098634622                                                                            | 0,377793227                                             |              |                           |
|             |                                                                                         | CDC42EP2     | CDC42 effector protein (Rho GTPase binding) 2                                           | -1,494002645                                                                            | 0,079772878                                             |              |                           |
|             |                                                                                         | CDC42EP3     | CDC42 effector protein (Rho GTPase binding) 3                                           | -1,861738951                                                                            | 0,246473074                                             |              |                           |
|             |                                                                                         | CLASP1       | cytoplasmic linker associated protein 1                                                 | 1,061998045                                                                             | 0,868801082                                             |              |                           |
|             |                                                                                         | CLASP2       | cytoplasmic linker associated protein 2                                                 | 2,834464354                                                                             | 0,157080972                                             |              |                           |
|             |                                                                                         | CYFIP1       | cytoplasmic FMR1 interacting protein 1                                                  | 1,137896182                                                                             | 0,681131705                                             |              |                           |
|             |                                                                                         | CYFIP2       | cytoplasmic FMR1 interacting protein 2                                                  | 1,596264494                                                                             | 0,543958341                                             |              |                           |
|             |                                                                                         | EZR          | ezrin                                                                                   | -1,596251198                                                                            | 0,334766835                                             |              |                           |
|             |                                                                                         | LLGL1        | lethal giant larvae homolog 1 (Drosophila)                                              | -1,128544056                                                                            | 0,269171582                                             |              |                           |
|             |                                                                                         | MARK2        | MAP/microtubule affinity-regulating kinase 2                                            | -1,273126325                                                                            | 0,129975017                                             |              |                           |
|             |                                                                                         | MYLK2        | myosin light chain kinase 2                                                             | -1,092614735                                                                            | 0,424341208                                             |              |                           |
|             |                                                                                         | SSH1         | slingshot protein phosphatase 2                                                         | -1,04041469                                                                             | 0,934539012                                             |              |                           |
|             |                                                                                         | M            | CMM                                                                                     | ACTR2                                                                                   | ARP2 actin-related protein 2 homolog (yeast)            | -1,503602234 | 0,315306589               |
|             |                                                                                         |              |                                                                                         | ACTR3                                                                                   | ARP3 actin-related protein 3 homolog (yeast)            | -1,364659104 | 0,045988538               |
| ARAP1       | ArfGAP with RhoGAP domain, ankyrin repeat and PH domain 1                               |              |                                                                                         | -1,236389918                                                                            | 0,352939392                                             |              |                           |
| ARFIP2      | ADP-ribosylation factor interacting protein 2                                           |              |                                                                                         | -1,234152222                                                                            | 0,155549477                                             |              |                           |
| ARHGDB8     | Rho GDP Dissociation Inhibitor (GDI) Beta                                               |              |                                                                                         | N/A                                                                                     | N/A                                                     |              |                           |
| ARHGEF11    | Rho guanine nucleotide exchange factor (GEF) 11                                         |              |                                                                                         | 1,157847151                                                                             | 0,032047868                                             |              |                           |
| ARPC1B      | actin related protein 2/3 complex, subunit 1B, 41kDa                                    |              |                                                                                         | -2,035619024                                                                            | 0,23502008                                              |              |                           |
| ARPC2       | actin related protein 2/3 complex, subunit 2, 34kDa                                     |              |                                                                                         | -1,519073566                                                                            | 0,068624421                                             |              |                           |
| ARPC3       | actin related protein 2/3 complex, subunit 3, 21kDa                                     |              |                                                                                         | -1,246892199                                                                            | 0,136944137                                             |              |                           |
| ARPC5       | actin related protein 2/3 complex, subunit 5, 16kDa                                     |              |                                                                                         | -1,242616715                                                                            | 0,652671905                                             |              |                           |
| CALD1       | caldesmon 1                                                                             |              |                                                                                         | -1,856108445                                                                            | 0,14922611                                              |              |                           |
| CDK5        | cyclin-dependent kinase 5                                                               |              |                                                                                         | -1,133171035                                                                            | 0,339107101                                             |              |                           |
| CDK5R1      | cyclin-dependent kinase 5, regulatory subunit 1 (p35)                                   |              |                                                                                         | 5,676197133                                                                             | 0,155534829                                             |              |                           |
| DSTN        | destrin (actin depolymerizing factor)                                                   |              |                                                                                         | -1,408392969                                                                            | 0,077267785                                             |              |                           |
| MSN         | moesin                                                                                  |              |                                                                                         | -1,28585033                                                                             | 0,099852236                                             |              |                           |
| NCK1        | NCK adaptor protein 1                                                                   |              |                                                                                         | 1,217411578                                                                             | 0,275239235                                             |              |                           |
| PAK4        | p21 protein (Cdc42/Rac)-activated kinase 4                                              |              |                                                                                         | -1,330618918                                                                            | 0,230576043                                             |              |                           |
| RAC1        | ras-related C3 botulinum toxin substrate 1 (rho family, small GTP binding protein Rac1) | 1,188269816  | 0,45114209                                                                              |                                                                                         |                                                         |              |                           |
| ROCK1       | Rho-associated, coiled-coil containing protein kinase 1                                 | 1,031891352  | 0,838245327                                                                             |                                                                                         |                                                         |              |                           |
| WASF1       | WAS protein family, member 1                                                            | 1,328340735  | 0,514233374                                                                             |                                                                                         |                                                         |              |                           |
| WASL        | Wiskott-Aldrich syndrome-like                                                           | 1,114032853  | 0,839941625                                                                             |                                                                                         |                                                         |              |                           |
| Cell Cycle  | M                                                                                       | AURKA        | aurora kinase A                                                                         | -2,000549                                                                               | 0,089832412                                             |              |                           |
|             |                                                                                         | AURKB        | aurora kinase B                                                                         | N/A                                                                                     | N/A                                                     |              |                           |
|             |                                                                                         | CCNA1        | cyclin A1                                                                               | -2,904782041                                                                            | 0,305380186                                             |              |                           |
|             |                                                                                         | CCNB2        | cyclin B2                                                                               | -1,063396901                                                                            | 0,512263489                                             |              |                           |
|             |                                                                                         | CIT          | citron (rho-interacting, serine/threonine kinase 21)                                    | -1,196914076                                                                            | 0,401912233                                             |              |                           |
|             |                                                                                         | CLASP1       | cytoplasmic linker associated protein 1                                                 | 1,061998045                                                                             | 0,868801082                                             |              |                           |
|             |                                                                                         | CLASP2       | cytoplasmic linker associated protein 2                                                 | 2,834464354                                                                             | 0,157080972                                             |              |                           |
|             |                                                                                         | CLIP1        | CAP-GLY domain containing linker protein 1                                              | 1,345938836                                                                             | 0,336549573                                             |              |                           |
|             |                                                                                         | MAPRE1       | microtubule-associated protein, RP/EB family, member 1                                  | -1,037168917                                                                            | 0,908769208                                             |              |                           |
|             |                                                                                         | MAPRE2       | microtubule-associated protein, RP/EB family, member 2                                  | 1,112404355                                                                             | 0,655329185                                             |              |                           |
|             |                                                                                         | CA           | CK                                                                                      | ARHGEF11                                                                                | Rho guanine nucleotide exchange factor (GEF) 11         | 1,157847151  | 0,032047868               |
|             |                                                                                         |              |                                                                                         | AURKB                                                                                   | aurora kinase B                                         | N/A          | N/A                       |
|             |                                                                                         |              |                                                                                         | AURKC                                                                                   | aurora kinase C                                         | -1,069101124 | 0,683372277               |
|             |                                                                                         |              |                                                                                         | DSTN                                                                                    | destrin (actin depolymerizing factor)                   | -1,408392969 | 0,077267785               |
|             |                                                                                         |              |                                                                                         | RACGAP1                                                                                 | Rho GTPase activating protein 1                         | -1,154046397 | 0,438821409               |
|             |                                                                                         |              |                                                                                         | ROCK1                                                                                   | Rho-associated, coiled-coil containing protein kinase 1 | 1,031891352  | 0,838245327               |
|             |                                                                                         |              |                                                                                         | Cal                                                                                     | CA                                                      | BAIAP2       | BAI1-associated protein 2 |
| MSN         | moesin                                                                                  | -1,28585033  | 0,099852236                                                                             |                                                                                         |                                                         |              |                           |
| NCK1        | NCK adaptor protein 1                                                                   | 1,217411578  | 0,275239235                                                                             |                                                                                         |                                                         |              |                           |
| NCK2        | NCK adaptor protein 2                                                                   | 1,361139843  | 0,471943662                                                                             |                                                                                         |                                                         |              |                           |
| G-Prot      | Cal                                                                                     | PAK1         | p21 protein (Cdc42/Rac)-activated kinase 1                                              | -1,049636184                                                                            | 0,69563444                                              |              |                           |
|             |                                                                                         | CALD1        | caldesmon 1                                                                             | -1,856108445                                                                            | 0,14922611                                              |              |                           |
|             |                                                                                         | CALM1        | calmodulin 1 (phosphorylase kinase, delta)                                              | 1,495960899                                                                             | 0,48990544                                              |              |                           |
|             |                                                                                         | CASK         | calcium/calmodulin-dependent serine protein kinase (MAGUK family)                       | 1,311777174                                                                             | 0,451319417                                             |              |                           |
|             |                                                                                         | IQGAP1       | IQ motif containing GTPase activating protein 1                                         | -1,550087076                                                                            | 0,144930732                                             |              |                           |
|             |                                                                                         | IQGAP2       | IQ motif containing GTPase activating protein 2                                         | -1,277927816                                                                            | 0,483096003                                             |              |                           |
|             |                                                                                         | MYLK         | myosin light chain kinase                                                               | -1,470396193                                                                            | 0,447098435                                             |              |                           |
| MYLK2       | myosin light chain kinase 2                                                             | -1,092614735 | 0,424341208                                                                             |                                                                                         |                                                         |              |                           |
| PPP3CA      | protein phosphatase 3, catalytic subunit, alpha isozyme                                 | -1,273230036 | 0,229834996                                                                             |                                                                                         |                                                         |              |                           |
| PPP3CB      | protein phosphatase 3, catalytic subunit, beta isozyme                                  | 1,126069229  | 0,688322699                                                                             |                                                                                         |                                                         |              |                           |
| G-Prot      | G-Prot                                                                                  | ARAP1        | ArfGAP with RhoGAP domain, ankyrin repeat and PH domain 1                               | -1,236389918                                                                            | 0,352939392                                             |              |                           |
|             |                                                                                         | ARFIP2       | ADP-ribosylation factor interacting protein 2                                           | -1,234152222                                                                            | 0,155549477                                             |              |                           |

|           |                               |                                      |                                                                                         |              |             |
|-----------|-------------------------------|--------------------------------------|-----------------------------------------------------------------------------------------|--------------|-------------|
| Kin & Pho | Kin & Pho                     | ARHGAP6                              | Rho GTPase activating protein 6                                                         | 4,041287117  | 0,269730554 |
|           |                               | ARHGD1B                              | Rho GDP Dissociation Inhibitor (GDI) Beta                                               | N/A          | N/A         |
|           |                               | ARHGEF11                             | Rho guanine nucleotide exchange factor (GEF) 11                                         | 1,157847151  | 0,032047868 |
|           |                               | CDC42                                | cell division cycle 42                                                                  | -3,098634622 | 0,377793227 |
|           |                               | CDC42EP2                             | CDC42 effector protein (Rho GTPase binding) 2                                           | -1,494002645 | 0,079772878 |
|           |                               | CFL1                                 | cofilin 1 (non-muscle)                                                                  | -1,136897626 | 0,40051435  |
|           |                               | CIT                                  | citron (rho-interacting, serine/threonine kinase 21)                                    | -1,196914076 | 0,401912233 |
|           |                               | CYFIP1                               | cytoplasmic FMR1 interacting protein 1                                                  | 1,137896182  | 0,681131705 |
|           |                               | CYFIP2                               | cytoplasmic FMR1 interacting protein 2                                                  | 1,596264494  | 0,543958341 |
|           |                               | DIAPH1                               | diaphanous-related formin 1                                                             | 1,007075561  | 0,952344888 |
|           |                               | IQGAP1                               | IQ motif containing GTPase activating protein 1                                         | -1,550087076 | 0,144930732 |
|           |                               | IQGAP2                               | IQ motif containing GTPase activating protein 2                                         | -1,277927816 | 0,483096003 |
|           |                               | LIMK1                                | LIM domain kinase 1                                                                     | -1,12698585  | 0,241706114 |
|           |                               | LIMK2                                | LIM domain kinase 2                                                                     | -1,497858604 | 0,302910245 |
|           |                               | MAPK13                               | mitogen-activated protein kinase 13                                                     | -1,169063329 | 0,301090941 |
|           |                               | RAC1                                 | ras-related C3 botulinum toxin substrate 1 (rho family, small GTP binding protein Rac1) | 1,188269816  | 0,45114209  |
|           |                               | RACGAP1                              | Rac GTPase activating protein 1                                                         | -1,154046397 | 0,438821409 |
|           |                               | RHOA                                 | ras homolog family member A                                                             | 1,024052574  | 0,930925928 |
|           |                               | ROCK1                                | Rho-associated, coiled-coil containing protein kinase 1                                 | 1,031891352  | 0,838245327 |
|           |                               | TIAM1                                | T-cell lymphoma invasion and metastasis 1                                               | -1,430644316 | 0,426416601 |
|           |                               | WAS                                  | Wiskott-Aldrich syndrome                                                                | -1,213442957 | 0,344056056 |
| WASL      | Wiskott-Aldrich syndrome-like | 1,114032853                          | 0,839941625                                                                             |              |             |
|           |                               | Fold change (Stem v Differentiation) | p-paired (Stem v Differentiation)                                                       |              |             |
|           |                               | -2,0000549                           | 0,089832412                                                                             |              |             |
|           |                               | N/A                                  | N/A                                                                                     |              |             |
|           |                               | -1,069101124                         | 0,683372277                                                                             |              |             |
|           |                               | 1,311777174                          | 0,451519417                                                                             |              |             |
|           |                               | -1,268682948                         | 0,541596111                                                                             |              |             |
|           |                               | -1,133171035                         | 0,339107101                                                                             |              |             |
|           |                               | 5,676197133                          | 0,155534829                                                                             |              |             |
|           |                               | -1,196914076                         | 0,401912233                                                                             |              |             |
|           |                               | -1,12698585                          | 0,241706114                                                                             |              |             |
|           |                               | -1,497858604                         | 0,302910245                                                                             |              |             |
|           |                               | -1,13035059                          | 0,274890011                                                                             |              |             |
|           |                               | -1,169063329                         | 0,301090941                                                                             |              |             |
|           |                               | -1,273126325                         | 0,129975017                                                                             |              |             |
|           |                               | -1,470396193                         | 0,447098435                                                                             |              |             |
|           |                               | -1,092614735                         | 0,424341208                                                                             |              |             |
|           |                               | -1,049636184                         | 0,69563444                                                                              |              |             |
|           |                               | -1,330618918                         | 0,230576043                                                                             |              |             |
|           |                               | -1,409612442                         | 0,460024068                                                                             |              |             |
|           |                               | -1,036232149                         | 0,822408557                                                                             |              |             |
|           |                               | -1,273230036                         | 0,229834996                                                                             |              |             |
|           |                               | 1,126069229                          | 0,688322699                                                                             |              |             |
|           |                               | 1,031891352                          | 0,838245327                                                                             |              |             |
|           |                               | -1,040441469                         | 0,934539012                                                                             |              |             |
|           |                               | -1,40249594                          | 0,018442329                                                                             |              |             |
